# Supplementary material for: Motor System Oligodendroglia Atlas Reveals Activation States Associated with Region-Specific Vulnerability in ALS
Source: Research Square preprint supplement (doi:10.21203/rs.3.rs-8351425/v1), 2026-01-07
Supplement: Supplementary file 1 [file 0617e58b2a69701208ee82fd.xlsx]

## Sheet: Supplementary_Information
Table	Info
Table S1	Sample Level Metadata of the Motor Cortex and Spinal Cord Single-nuclei RNA Sequencing Data
Table S2	Sample Level Metadata and the Protein Concentrations of the CSF Data
Table S3	Marker Genes of the Motor Cortex and Spinal Cord Oligodendrocyte Subclusters
Table S4	Marker Genes of the Motor Cortex and Spinal Cord OPC Subclusters
Table S5	Marker Genes of the Motor Cortex and Spinal Cord Oligodendrocyte Activation States
Table S6	DEGs Motor Cortex Oligodendrocytes C9ALS vs. Control
Table S7	DEGs Motor Cortex Oligodendrocytes sALS vs. Control
Table S8	DEGs Spinal Cord Oligodendrocytes C9ALS vs. Control
Table S9	DEGs Spinal Cord Oligodendrocytes sALS vs. Control
Table S10	Up GO Terms of the DEGs Motor Cortex Oligodendrocytes C9ALS vs. Control
Table S11	Up GO Terms of the DEGs Spinal Cord Oligodendrocytes C9ALS vs. Control
Table S12	Down GO Terms of the DEGs Spinal Cord Oligodendrocytes C9ALS vs. Control
Table S13	Up GO Terms of the DEGs Spinal Cord Oligodendrocytes sALS vs. Control
Table S14	DEGs Motor Cortex OPCs C9ALS vs. Control
Table S15	DEGs Motor Cortex OPCs sALS vs. Control
Table S16	DEGs Spinal Cord OPCs C9ALS vs. Control
Table S17	DEGs Spinal Cord OPCs sALS vs. Control
Table S18	Up GO Terms of the DEGs Spinal Cord OPCs C9ALS vs. Control
Table S19	Down GO Terms of the DEGs Spinal Cord OPCs C9ALS vs. Control
Table S20	Up GO Terms of the DEGs Spinal Cord OPCs C9ALS vs. Control
Table S21	Down GO Terms of the DEGs Spinal Cord OPCs C9ALS vs. Control
Table S22	Color Palette Used in the Figures.

## Sheet: MC_SC_SnRNAseq_Sample_Metadata
Sample_ID	Dataset	Publcation	Status	Age	Age_Type	Sex	Organism	Region	Subregion	Matter	Tissue	Enrichment	Enrichment_Cell
Bakken_MC_H18_30_001	Bakken_2021_MC_Control	https://doi.org/10.1038/s41586-021-03465-8	Control	60	Adult	Female	Homo_Sapiens	Brain	Motor_Cortex	Both	Brain_Motor_Cortex_Both	Yes	Neurons
Bakken_MC_H18_30_002	Bakken_2021_MC_Control	https://doi.org/10.1038/s41586-021-03465-8	Control	50	Adult	Male	Homo_Sapiens	Brain	Motor_Cortex	Both	Brain_Motor_Cortex_Both	Yes	Neurons
Donovan_SC_HSC05	Donovan_2024_SC_Control	https://doi.org/10.1016/j.celrep.2024.113683	Control	49	Adult	Female	Homo_Sapiens	Spinal_Cord	Lumbar_Dorsal_Horn	Gray_Matter	Spinal_Cord_Lumbar_Dorsal_Horn_Gray_Matter	Yes	Microglia
Donovan_SC_S1	Donovan_2024_SC_Control	https://doi.org/10.1016/j.celrep.2024.113683	Control	43	Adult	Male	Homo_Sapiens	Spinal_Cord	Lumbar_Dorsal_Horn	Gray_Matter	Spinal_Cord_Lumbar_Dorsal_Horn_Gray_Matter	Yes	Microglia
Gautier_SC_S1_Replicate_1	Gautier_2023_SC_Control	https://doi.org/10.1016/j.neuron.2023.10.035	Control	56	Adult	Male	Homo_Sapiens	Spinal_Cord	Cervical	Not_Mentioned	Spinal_Cord_Cervical_Not_Mentioned	Yes	Neurons
Gautier_SC_S2_Replicate_2	Gautier_2023_SC_Control	https://doi.org/10.1016/j.neuron.2023.10.035	Control	56	Adult	Male	Homo_Sapiens	Spinal_Cord	Cervical	Not_Mentioned	Spinal_Cord_Cervical_Not_Mentioned	Yes	Neurons
Georgopoulou_MC_C9ALS_1	Georgopoulou_2025_MC_Control_ALS	https://doi.org/10.1038/s41593-025-02075-1	C9ALS	48	Adult	Male	Homo_Sapiens	Brain	Motor_Cortex	Both	Brain_Motor_Cortex_Both	No	Not_Applicable
Georgopoulou_MC_C9ALS_2	Georgopoulou_2025_MC_Control_ALS	https://doi.org/10.1038/s41593-025-02075-1	C9ALS	57	Adult	Male	Homo_Sapiens	Brain	Motor_Cortex	Both	Brain_Motor_Cortex_Both	No	Not_Applicable
Georgopoulou_MC_C9ALS_3	Georgopoulou_2025_MC_Control_ALS	https://doi.org/10.1038/s41593-025-02075-1	C9ALS	55	Adult	Male	Homo_Sapiens	Brain	Motor_Cortex	Both	Brain_Motor_Cortex_Both	No	Not_Applicable
Georgopoulou_MC_C9ALS_4	Georgopoulou_2025_MC_Control_ALS	https://doi.org/10.1038/s41593-025-02075-1	C9ALS	57	Adult	Female	Homo_Sapiens	Brain	Motor_Cortex	Both	Brain_Motor_Cortex_Both	No	Not_Applicable
Georgopoulou_MC_C9ALS_5	Georgopoulou_2025_MC_Control_ALS	https://doi.org/10.1038/s41593-025-02075-1	C9ALS	49	Adult	Male	Homo_Sapiens	Brain	Motor_Cortex	Both	Brain_Motor_Cortex_Both	No	Not_Applicable
Georgopoulou_MC_Control_1	Georgopoulou_2025_MC_Control_ALS	https://doi.org/10.1038/s41593-025-02075-1	Control	64	Adult	Male	Homo_Sapiens	Brain	Motor_Cortex	Both	Brain_Motor_Cortex_Both	No	Not_Applicable
Georgopoulou_MC_Control_2	Georgopoulou_2025_MC_Control_ALS	https://doi.org/10.1038/s41593-025-02075-1	Control	58	Adult	Male	Homo_Sapiens	Brain	Motor_Cortex	Both	Brain_Motor_Cortex_Both	No	Not_Applicable
Georgopoulou_MC_Control_3	Georgopoulou_2025_MC_Control_ALS	https://doi.org/10.1038/s41593-025-02075-1	Control	70	Adult	Male	Homo_Sapiens	Brain	Motor_Cortex	Both	Brain_Motor_Cortex_Both	No	Not_Applicable
Georgopoulou_MC_Control_4	Georgopoulou_2025_MC_Control_ALS	https://doi.org/10.1038/s41593-025-02075-1	Control	72	Adult	Male	Homo_Sapiens	Brain	Motor_Cortex	Both	Brain_Motor_Cortex_Both	No	Not_Applicable
Georgopoulou_MC_Control_5	Georgopoulou_2025_MC_Control_ALS	https://doi.org/10.1038/s41593-025-02075-1	Control	60	Adult	Female	Homo_Sapiens	Brain	Motor_Cortex	Both	Brain_Motor_Cortex_Both	No	Not_Applicable
Georgopoulou_MC_sALS_1	Georgopoulou_2025_MC_Control_ALS	https://doi.org/10.1038/s41593-025-02075-1	sALS	61	Adult	Male	Homo_Sapiens	Brain	Motor_Cortex	Both	Brain_Motor_Cortex_Both	No	Not_Applicable
Georgopoulou_MC_sALS_2	Georgopoulou_2025_MC_Control_ALS	https://doi.org/10.1038/s41593-025-02075-1	sALS	49	Adult	Male	Homo_Sapiens	Brain	Motor_Cortex	Both	Brain_Motor_Cortex_Both	No	Not_Applicable
Georgopoulou_MC_sALS_3	Georgopoulou_2025_MC_Control_ALS	https://doi.org/10.1038/s41593-025-02075-1	sALS	61	Adult	Male	Homo_Sapiens	Brain	Motor_Cortex	Both	Brain_Motor_Cortex_Both	No	Not_Applicable
Georgopoulou_MC_sALS_4	Georgopoulou_2025_MC_Control_ALS	https://doi.org/10.1038/s41593-025-02075-1	sALS	77	Adult	Male	Homo_Sapiens	Brain	Motor_Cortex	Both	Brain_Motor_Cortex_Both	No	Not_Applicable
Georgopoulou_MC_sALS_5	Georgopoulou_2025_MC_Control_ALS	https://doi.org/10.1038/s41593-025-02075-1	sALS	64	Adult	Female	Homo_Sapiens	Brain	Motor_Cortex	Both	Brain_Motor_Cortex_Both	No	Not_Applicable
Georgopoulou_SC_C9ALS_1	Georgopoulou_2025_SC_Control_ALS	https://doi.org/10.1038/s41593-025-02075-1	C9ALS	48	Adult	Male	Homo_Sapiens	Spinal_Cord	Thoracic	Both	Spinal_Cord_Thoracic_Both	No	Not_Applicable
Georgopoulou_SC_C9ALS_2	Georgopoulou_2025_SC_Control_ALS	https://doi.org/10.1038/s41593-025-02075-1	C9ALS	57	Adult	Male	Homo_Sapiens	Spinal_Cord	Thoracic	Both	Spinal_Cord_Thoracic_Both	No	Not_Applicable
Georgopoulou_SC_C9ALS_3	Georgopoulou_2025_SC_Control_ALS	https://doi.org/10.1038/s41593-025-02075-1	C9ALS	55	Adult	Male	Homo_Sapiens	Spinal_Cord	Thoracic	Both	Spinal_Cord_Thoracic_Both	No	Not_Applicable
Georgopoulou_SC_C9ALS_4	Georgopoulou_2025_SC_Control_ALS	https://doi.org/10.1038/s41593-025-02075-1	C9ALS	57	Adult	Female	Homo_Sapiens	Spinal_Cord	Thoracic	Both	Spinal_Cord_Thoracic_Both	No	Not_Applicable
Georgopoulou_SC_C9ALS_5	Georgopoulou_2025_SC_Control_ALS	https://doi.org/10.1038/s41593-025-02075-1	C9ALS	49	Adult	Male	Homo_Sapiens	Spinal_Cord	Thoracic	Both	Spinal_Cord_Thoracic_Both	No	Not_Applicable
Georgopoulou_SC_Control_1	Georgopoulou_2025_SC_Control_ALS	https://doi.org/10.1038/s41593-025-02075-1	Control	70	Adult	Male	Homo_Sapiens	Spinal_Cord	Thoracic	Both	Spinal_Cord_Thoracic_Both	No	Not_Applicable
Georgopoulou_SC_Control_2	Georgopoulou_2025_SC_Control_ALS	https://doi.org/10.1038/s41593-025-02075-1	Control	74	Adult	Male	Homo_Sapiens	Spinal_Cord	Thoracic	Both	Spinal_Cord_Thoracic_Both	No	Not_Applicable
Georgopoulou_SC_Control_3	Georgopoulou_2025_SC_Control_ALS	https://doi.org/10.1038/s41593-025-02075-1	Control	51	Adult	Male	Homo_Sapiens	Spinal_Cord	Thoracic	Both	Spinal_Cord_Thoracic_Both	No	Not_Applicable
Georgopoulou_SC_Control_4	Georgopoulou_2025_SC_Control_ALS	https://doi.org/10.1038/s41593-025-02075-1	Control	55	Adult	Male	Homo_Sapiens	Spinal_Cord	Thoracic	Both	Spinal_Cord_Thoracic_Both	No	Not_Applicable
Georgopoulou_SC_Control_5	Georgopoulou_2025_SC_Control_ALS	https://doi.org/10.1038/s41593-025-02075-1	Control	60	Adult	Female	Homo_Sapiens	Spinal_Cord	Thoracic	Both	Spinal_Cord_Thoracic_Both	No	Not_Applicable
Georgopoulou_SC_sALS_1	Georgopoulou_2025_SC_Control_ALS	https://doi.org/10.1038/s41593-025-02075-1	sALS	61	Adult	Male	Homo_Sapiens	Spinal_Cord	Thoracic	Both	Spinal_Cord_Thoracic_Both	No	Not_Applicable
Georgopoulou_SC_sALS_2	Georgopoulou_2025_SC_Control_ALS	https://doi.org/10.1038/s41593-025-02075-1	sALS	49	Adult	Male	Homo_Sapiens	Spinal_Cord	Thoracic	Both	Spinal_Cord_Thoracic_Both	No	Not_Applicable
Georgopoulou_SC_sALS_3	Georgopoulou_2025_SC_Control_ALS	https://doi.org/10.1038/s41593-025-02075-1	sALS	61	Adult	Male	Homo_Sapiens	Spinal_Cord	Thoracic	Both	Spinal_Cord_Thoracic_Both	No	Not_Applicable
Georgopoulou_SC_sALS_4	Georgopoulou_2025_SC_Control_ALS	https://doi.org/10.1038/s41593-025-02075-1	sALS	77	Adult	Male	Homo_Sapiens	Spinal_Cord	Thoracic	Both	Spinal_Cord_Thoracic_Both	No	Not_Applicable
Georgopoulou_SC_sALS_5	Georgopoulou_2025_SC_Control_ALS	https://doi.org/10.1038/s41593-025-02075-1	sALS	64	Adult	Female	Homo_Sapiens	Spinal_Cord	Thoracic	Both	Spinal_Cord_Thoracic_Both	No	Not_Applicable
Li_MC_A1	Li_2023_MC_Control_ALS	https://doi.org/10.1038/s41467-023-41033-y	C9ALS	72.45	Adult	Male	Homo_Sapiens	Brain	Motor_Cortex	Not_Mentioned	Brain_Motor_Cortex_Not_Mentioned	No	Not_Applicable
Li_MC_A2	Li_2023_MC_Control_ALS	https://doi.org/10.1038/s41467-023-41033-y	C9ALS	66.33	Adult	Female	Homo_Sapiens	Brain	Motor_Cortex	Not_Mentioned	Brain_Motor_Cortex_Not_Mentioned	No	Not_Applicable
Li_MC_A3	Li_2023_MC_Control_ALS	https://doi.org/10.1038/s41467-023-41033-y	C9ALS	71.82	Adult	Female	Homo_Sapiens	Brain	Motor_Cortex	Not_Mentioned	Brain_Motor_Cortex_Not_Mentioned	No	Not_Applicable
Li_MC_A4	Li_2023_MC_Control_ALS	https://doi.org/10.1038/s41467-023-41033-y	C9ALS	58.87	Adult	Female	Homo_Sapiens	Brain	Motor_Cortex	Not_Mentioned	Brain_Motor_Cortex_Not_Mentioned	No	Not_Applicable
Li_MC_A5	Li_2023_MC_Control_ALS	https://doi.org/10.1038/s41467-023-41033-y	C9ALS	63	Adult	Male	Homo_Sapiens	Brain	Motor_Cortex	Not_Mentioned	Brain_Motor_Cortex_Not_Mentioned	No	Not_Applicable
Li_MC_A6	Li_2023_MC_Control_ALS	https://doi.org/10.1038/s41467-023-41033-y	C9ALS	61.42	Adult	Male	Homo_Sapiens	Brain	Motor_Cortex	Not_Mentioned	Brain_Motor_Cortex_Not_Mentioned	No	Not_Applicable
Li_MC_C1	Li_2023_MC_Control_ALS	https://doi.org/10.1038/s41467-023-41033-y	Control	67	Adult	Female	Homo_Sapiens	Brain	Motor_Cortex	Not_Mentioned	Brain_Motor_Cortex_Not_Mentioned	No	Not_Applicable
Li_MC_C2	Li_2023_MC_Control_ALS	https://doi.org/10.1038/s41467-023-41033-y	Control	64	Adult	Male	Homo_Sapiens	Brain	Motor_Cortex	Not_Mentioned	Brain_Motor_Cortex_Not_Mentioned	No	Not_Applicable
Li_MC_C3	Li_2023_MC_Control_ALS	https://doi.org/10.1038/s41467-023-41033-y	Control	70	Adult	Male	Homo_Sapiens	Brain	Motor_Cortex	Not_Mentioned	Brain_Motor_Cortex_Not_Mentioned	No	Not_Applicable
Li_MC_C4	Li_2023_MC_Control_ALS	https://doi.org/10.1038/s41467-023-41033-y	Control	56	Adult	Male	Homo_Sapiens	Brain	Motor_Cortex	Not_Mentioned	Brain_Motor_Cortex_Not_Mentioned	No	Not_Applicable
Li_MC_C5	Li_2023_MC_Control_ALS	https://doi.org/10.1038/s41467-023-41033-y	Control	72.72	Adult	Female	Homo_Sapiens	Brain	Motor_Cortex	Not_Mentioned	Brain_Motor_Cortex_Not_Mentioned	No	Not_Applicable
Li_MC_C6	Li_2023_MC_Control_ALS	https://doi.org/10.1038/s41467-023-41033-y	Control	56	Adult	Female	Homo_Sapiens	Brain	Motor_Cortex	Not_Mentioned	Brain_Motor_Cortex_Not_Mentioned	No	Not_Applicable
Limone_MC_FC1	Limone_2024_MC_Control_ALS	https://doi.org/10.1038/s43587-024-00640-0	sALS	60.8	Adult	Female	Homo_Sapiens	Brain	Motor_Cortex	Gray	Brain_Motor_Cortex_Gray	No	Not_Applicable
Limone_MC_FC11	Limone_2024_MC_Control_ALS	https://doi.org/10.1038/s43587-024-00640-0	Control	64.3	Adult	Female	Homo_Sapiens	Brain	Motor_Cortex	Gray	Brain_Motor_Cortex_Gray	No	Not_Applicable
Limone_MC_FC12	Limone_2024_MC_Control_ALS	https://doi.org/10.1038/s43587-024-00640-0	Control	64.3	Adult	Male	Homo_Sapiens	Brain	Motor_Cortex	Gray	Brain_Motor_Cortex_Gray	No	Not_Applicable
Limone_MC_FC13	Limone_2024_MC_Control_ALS	https://doi.org/10.1038/s43587-024-00640-0	Control	64.3	Adult	Male	Homo_Sapiens	Brain	Motor_Cortex	Gray	Brain_Motor_Cortex_Gray	No	Not_Applicable
Limone_MC_FC17	Limone_2024_MC_Control_ALS	https://doi.org/10.1038/s43587-024-00640-0	sALS	60.8	Adult	Female	Homo_Sapiens	Brain	Motor_Cortex	Gray	Brain_Motor_Cortex_Gray	No	Not_Applicable
Limone_MC_FC19	Limone_2024_MC_Control_ALS	https://doi.org/10.1038/s43587-024-00640-0	sALS	60.8	Adult	Male	Homo_Sapiens	Brain	Motor_Cortex	Gray	Brain_Motor_Cortex_Gray	No	Not_Applicable
Limone_MC_FC2	Limone_2024_MC_Control_ALS	https://doi.org/10.1038/s43587-024-00640-0	sALS	60.8	Adult	Male	Homo_Sapiens	Brain	Motor_Cortex	Gray	Brain_Motor_Cortex_Gray	No	Not_Applicable
Limone_MC_FC21	Limone_2024_MC_Control_ALS	https://doi.org/10.1038/s43587-024-00640-0	sALS	60.8	Adult	Female	Homo_Sapiens	Brain	Motor_Cortex	Gray	Brain_Motor_Cortex_Gray	No	Not_Applicable
ONeill_MC_JR27	ONeill_2024_MC_Control_ALS_FTD	https://doi.org/10.1101/2024.07.19.603731	sALS	Not_Mentioned	Adult	Male	Homo_Sapiens	Brain	Motor_Cortex	Not_Mentioned	Brain_Motor_Cortex_Not_Mentioned	No	Not_Applicable
ONeill_MC_JR34	ONeill_2024_MC_Control_ALS_FTD	https://doi.org/10.1101/2024.07.19.603731	sALS	Not_Mentioned	Adult	Female	Homo_Sapiens	Brain	Motor_Cortex	Not_Mentioned	Brain_Motor_Cortex_Not_Mentioned	No	Not_Applicable
ONeill_MC_JR47	ONeill_2024_MC_Control_ALS_FTD	https://doi.org/10.1101/2024.07.19.603731	sALS_FTD	Not_Mentioned	Adult	Female	Homo_Sapiens	Brain	Motor_Cortex	Not_Mentioned	Brain_Motor_Cortex_Not_Mentioned	No	Not_Applicable
ONeill_MC_JR65	ONeill_2024_MC_Control_ALS_FTD	https://doi.org/10.1101/2024.07.19.603731	Control	Not_Mentioned	Adult	Male	Homo_Sapiens	Brain	Motor_Cortex	Not_Mentioned	Brain_Motor_Cortex_Not_Mentioned	No	Not_Applicable
ONeill_MC_JR67	ONeill_2024_MC_Control_ALS_FTD	https://doi.org/10.1101/2024.07.19.603731	Control	Not_Mentioned	Adult	Male	Homo_Sapiens	Brain	Motor_Cortex	Not_Mentioned	Brain_Motor_Cortex_Not_Mentioned	No	Not_Applicable
ONeill_MC_JR9	ONeill_2024_MC_Control_ALS_FTD	https://doi.org/10.1101/2024.07.19.603731	sALS	Not_Mentioned	Adult	Male	Homo_Sapiens	Brain	Motor_Cortex	Not_Mentioned	Brain_Motor_Cortex_Not_Mentioned	No	Not_Applicable
Pineda_MC_191112_ALS_110_snRNA-B9	Pineda_2024_MC_Control_ALS	https://doi.org/10.1016/j.cell.2024.02.031	sALS	71.62	Adult	Female	Homo_Sapiens	Brain	Motor_Cortex	Both	Brain_Motor_Cortex_Both	No	Not_Applicable
Pineda_MC_191112_ALS_111_snRNA-B10	Pineda_2024_MC_Control_ALS	https://doi.org/10.1016/j.cell.2024.02.031	sALS	71.16	Adult	Female	Homo_Sapiens	Brain	Motor_Cortex	Both	Brain_Motor_Cortex_Both	No	Not_Applicable
Pineda_MC_191112_ALS_112_snRNA-D1	Pineda_2024_MC_Control_ALS	https://doi.org/10.1016/j.cell.2024.02.031	sALS	79.49	Adult	Female	Homo_Sapiens	Brain	Motor_Cortex	Both	Brain_Motor_Cortex_Both	No	Not_Applicable
Pineda_MC_191112_ALS_114_snRNA-B12	Pineda_2024_MC_Control_ALS	https://doi.org/10.1016/j.cell.2024.02.031	C9ALS	62.20	Adult	Female	Homo_Sapiens	Brain	Motor_Cortex	Both	Brain_Motor_Cortex_Both	No	Not_Applicable
Pineda_MC_191112_ALS_115_snRNA-C1	Pineda_2024_MC_Control_ALS	https://doi.org/10.1016/j.cell.2024.02.031	C9ALS	66.33	Adult	Female	Homo_Sapiens	Brain	Motor_Cortex	Both	Brain_Motor_Cortex_Both	No	Not_Applicable
Pineda_MC_191112_ALS_116_snRNA-C2	Pineda_2024_MC_Control_ALS	https://doi.org/10.1016/j.cell.2024.02.031	sALS	52.32	Adult	Male	Homo_Sapiens	Brain	Motor_Cortex	Both	Brain_Motor_Cortex_Both	No	Not_Applicable
Pineda_MC_191112_ALS_117_snRNA-C3	Pineda_2024_MC_Control_ALS	https://doi.org/10.1016/j.cell.2024.02.031	sALS	60.35	Adult	Male	Homo_Sapiens	Brain	Motor_Cortex	Both	Brain_Motor_Cortex_Both	No	Not_Applicable
Pineda_MC_191112_ALS_118_snRNA-C4	Pineda_2024_MC_Control_ALS	https://doi.org/10.1016/j.cell.2024.02.031	sALS	64.28	Adult	Male	Homo_Sapiens	Brain	Motor_Cortex	Both	Brain_Motor_Cortex_Both	No	Not_Applicable
Pineda_MC_191112_ALS_120_snRNA-A1	Pineda_2024_MC_Control_ALS	https://doi.org/10.1016/j.cell.2024.02.031	sALS	66.74	Adult	Male	Homo_Sapiens	Brain	Motor_Cortex	Both	Brain_Motor_Cortex_Both	No	Not_Applicable
Pineda_MC_191112_ALS_122_snRNA-D2	Pineda_2024_MC_Control_ALS	https://doi.org/10.1016/j.cell.2024.02.031	sALS	70.83	Adult	Male	Homo_Sapiens	Brain	Motor_Cortex	Both	Brain_Motor_Cortex_Both	No	Not_Applicable
Pineda_MC_191112_ALS_124_snRNA-A3	Pineda_2024_MC_Control_ALS	https://doi.org/10.1016/j.cell.2024.02.031	sALS	71.88	Adult	Male	Homo_Sapiens	Brain	Motor_Cortex	Both	Brain_Motor_Cortex_Both	No	Not_Applicable
Pineda_MC_191112_ALS_126_snRNA-A6	Pineda_2024_MC_Control_ALS	https://doi.org/10.1016/j.cell.2024.02.031	sALS	76.33	Adult	Male	Homo_Sapiens	Brain	Motor_Cortex	Both	Brain_Motor_Cortex_Both	No	Not_Applicable
Pineda_MC_191112_ALS_127_snRNA-A4	Pineda_2024_MC_Control_ALS	https://doi.org/10.1016/j.cell.2024.02.031	sALS	79.67	Adult	Male	Homo_Sapiens	Brain	Motor_Cortex	Both	Brain_Motor_Cortex_Both	No	Not_Applicable
Pineda_MC_191112_ALS_128_snRNA-A7	Pineda_2024_MC_Control_ALS	https://doi.org/10.1016/j.cell.2024.02.031	C9ALS	58.70	Adult	Male	Homo_Sapiens	Brain	Motor_Cortex	Both	Brain_Motor_Cortex_Both	No	Not_Applicable
Pineda_MC_191112_ALS_129_snRNA-A2	Pineda_2024_MC_Control_ALS	https://doi.org/10.1016/j.cell.2024.02.031	C9ALS	63.01	Adult	Male	Homo_Sapiens	Brain	Motor_Cortex	Both	Brain_Motor_Cortex_Both	No	Not_Applicable
Pineda_MC_191112_ALS_130_snRNA-A5	Pineda_2024_MC_Control_ALS	https://doi.org/10.1016/j.cell.2024.02.031	C9ALS	67.95	Adult	Male	Homo_Sapiens	Brain	Motor_Cortex	Both	Brain_Motor_Cortex_Both	No	Not_Applicable
Pineda_MC_191114_PN_301_snRNA-E7	Pineda_2024_MC_Control_ALS	https://doi.org/10.1016/j.cell.2024.02.031	Control	54.37	Adult	Female	Homo_Sapiens	Brain	Motor_Cortex	Both	Brain_Motor_Cortex_Both	No	Not_Applicable
Pineda_MC_191114_PN_303_snRNA-E8	Pineda_2024_MC_Control_ALS	https://doi.org/10.1016/j.cell.2024.02.031	Control	61.19	Adult	Female	Homo_Sapiens	Brain	Motor_Cortex	Both	Brain_Motor_Cortex_Both	No	Not_Applicable
Pineda_MC_191114_PN_304_snRNA-E9	Pineda_2024_MC_Control_ALS	https://doi.org/10.1016/j.cell.2024.02.031	Control	67.40	Adult	Female	Homo_Sapiens	Brain	Motor_Cortex	Both	Brain_Motor_Cortex_Both	No	Not_Applicable
Pineda_MC_191114_PN_306_snRNA-E10	Pineda_2024_MC_Control_ALS	https://doi.org/10.1016/j.cell.2024.02.031	Control	89.64	Adult	Female	Homo_Sapiens	Brain	Motor_Cortex	Both	Brain_Motor_Cortex_Both	No	Not_Applicable
Pineda_MC_191114_PN_307_snRNA-E11	Pineda_2024_MC_Control_ALS	https://doi.org/10.1016/j.cell.2024.02.031	Control	89.59	Adult	Female	Homo_Sapiens	Brain	Motor_Cortex	Both	Brain_Motor_Cortex_Both	No	Not_Applicable
Pineda_MC_191114_PN_309_snRNA-F1	Pineda_2024_MC_Control_ALS	https://doi.org/10.1016/j.cell.2024.02.031	Control	92.15	Adult	Female	Homo_Sapiens	Brain	Motor_Cortex	Both	Brain_Motor_Cortex_Both	No	Not_Applicable
Pineda_MC_191114_PN_317_snRNA-F2	Pineda_2024_MC_Control_ALS	https://doi.org/10.1016/j.cell.2024.02.031	Control	62.00	Adult	Male	Homo_Sapiens	Brain	Motor_Cortex	Both	Brain_Motor_Cortex_Both	No	Not_Applicable
Pineda_MC_191114_PN_318_snRNA-F3	Pineda_2024_MC_Control_ALS	https://doi.org/10.1016/j.cell.2024.02.031	Control	64.98	Adult	Male	Homo_Sapiens	Brain	Motor_Cortex	Both	Brain_Motor_Cortex_Both	No	Not_Applicable
Pineda_MC_191114_PN_319_snRNA-F4	Pineda_2024_MC_Control_ALS	https://doi.org/10.1016/j.cell.2024.02.031	Control	73.91	Adult	Male	Homo_Sapiens	Brain	Motor_Cortex	Both	Brain_Motor_Cortex_Both	No	Not_Applicable
Pineda_MC_191114_PN_322_snRNA-F5	Pineda_2024_MC_Control_ALS	https://doi.org/10.1016/j.cell.2024.02.031	Control	80.08	Adult	Male	Homo_Sapiens	Brain	Motor_Cortex	Both	Brain_Motor_Cortex_Both	No	Not_Applicable
Pineda_MC_191114_PN_323_snRNA-F6	Pineda_2024_MC_Control_ALS	https://doi.org/10.1016/j.cell.2024.02.031	Control	80.25	Adult	Male	Homo_Sapiens	Brain	Motor_Cortex	Both	Brain_Motor_Cortex_Both	No	Not_Applicable
Pineda_MC_191114_PN_324_snRNA-F7	Pineda_2024_MC_Control_ALS	https://doi.org/10.1016/j.cell.2024.02.031	Control	84.79	Adult	Male	Homo_Sapiens	Brain	Motor_Cortex	Both	Brain_Motor_Cortex_Both	No	Not_Applicable
Pineda_MC_191114_PN_325_snRNA-F8	Pineda_2024_MC_Control_ALS	https://doi.org/10.1016/j.cell.2024.02.031	Control	84.29	Adult	Male	Homo_Sapiens	Brain	Motor_Cortex	Both	Brain_Motor_Cortex_Both	No	Not_Applicable
Pineda_MC_191114_PN_328_snRNA-F9	Pineda_2024_MC_Control_ALS	https://doi.org/10.1016/j.cell.2024.02.031	Control	66.36	Adult	Male	Homo_Sapiens	Brain	Motor_Cortex	Both	Brain_Motor_Cortex_Both	No	Not_Applicable
Pineda_MC_200721_PN_302_snRNA-B4	Pineda_2024_MC_Control_ALS	https://doi.org/10.1016/j.cell.2024.02.031	Control	58.64	Adult	Female	Homo_Sapiens	Brain	Motor_Cortex	Both	Brain_Motor_Cortex_Both	No	Not_Applicable
Pineda_MC_201019_ALS_101_snRNA-B1	Pineda_2024_MC_Control_ALS	https://doi.org/10.1016/j.cell.2024.02.031	sALS	54.85	Adult	Female	Homo_Sapiens	Brain	Motor_Cortex	Both	Brain_Motor_Cortex_Both	No	Not_Applicable
Pineda_MC_201019_ALS_102_snRNA-B2	Pineda_2024_MC_Control_ALS	https://doi.org/10.1016/j.cell.2024.02.031	sALS	58.50	Adult	Female	Homo_Sapiens	Brain	Motor_Cortex	Both	Brain_Motor_Cortex_Both	No	Not_Applicable
Pineda_MC_201019_ALS_103_snRNA-B3	Pineda_2024_MC_Control_ALS	https://doi.org/10.1016/j.cell.2024.02.031	sALS	59.37	Adult	Female	Homo_Sapiens	Brain	Motor_Cortex	Both	Brain_Motor_Cortex_Both	No	Not_Applicable
Pineda_MC_201019_ALS_104_snRNA-B4	Pineda_2024_MC_Control_ALS	https://doi.org/10.1016/j.cell.2024.02.031	sALS	60.29	Adult	Female	Homo_Sapiens	Brain	Motor_Cortex	Both	Brain_Motor_Cortex_Both	No	Not_Applicable
Pineda_MC_201019_ALS_106_snRNA-B5	Pineda_2024_MC_Control_ALS	https://doi.org/10.1016/j.cell.2024.02.031	sALS	61.97	Adult	Female	Homo_Sapiens	Brain	Motor_Cortex	Both	Brain_Motor_Cortex_Both	No	Not_Applicable
Pineda_MC_201019_ALS_108_snRNA-B6	Pineda_2024_MC_Control_ALS	https://doi.org/10.1016/j.cell.2024.02.031	sALS	64.21	Adult	Female	Homo_Sapiens	Brain	Motor_Cortex	Both	Brain_Motor_Cortex_Both	No	Not_Applicable
Pineda_MC_201019_ALS_113_snRNA-B7	Pineda_2024_MC_Control_ALS	https://doi.org/10.1016/j.cell.2024.02.031	C9ALS	58.87	Adult	Female	Homo_Sapiens	Brain	Motor_Cortex	Both	Brain_Motor_Cortex_Both	No	Not_Applicable
Pineda_MC_201019_PN_311_snRNA-B8	Pineda_2024_MC_Control_ALS	https://doi.org/10.1016/j.cell.2024.02.031	Control	93.97	Adult	Female	Homo_Sapiens	Brain	Motor_Cortex	Both	Brain_Motor_Cortex_Both	No	Not_Applicable
Pineda_MC_210910_MCX_ALS_131_snRNA-C2	Pineda_2024_MC_Control_ALS	https://doi.org/10.1016/j.cell.2024.02.031	C9ALS	71.00	Adult	Female	Homo_Sapiens	Brain	Motor_Cortex	Both	Brain_Motor_Cortex_Both	No	Not_Applicable
Pineda_MC_210910_MCX_ALS_132_snRNA-C3	Pineda_2024_MC_Control_ALS	https://doi.org/10.1016/j.cell.2024.02.031	C9ALS	63.00	Adult	Male	Homo_Sapiens	Brain	Motor_Cortex	Both	Brain_Motor_Cortex_Both	No	Not_Applicable
Pineda_MC_210910_MCX_ALS_133_snRNA-C4	Pineda_2024_MC_Control_ALS	https://doi.org/10.1016/j.cell.2024.02.031	C9ALS	59.00	Adult	Male	Homo_Sapiens	Brain	Motor_Cortex	Both	Brain_Motor_Cortex_Both	No	Not_Applicable
Pineda_MC_210910_MCX_ALS_134_snRNA-C5	Pineda_2024_MC_Control_ALS	https://doi.org/10.1016/j.cell.2024.02.031	C9ALS	60.00	Adult	Female	Homo_Sapiens	Brain	Motor_Cortex	Both	Brain_Motor_Cortex_Both	No	Not_Applicable
Pineda_MC_210910_MCX_ALS_135_snRNA-C6	Pineda_2024_MC_Control_ALS	https://doi.org/10.1016/j.cell.2024.02.031	C9ALS	62.00	Adult	Female	Homo_Sapiens	Brain	Motor_Cortex	Both	Brain_Motor_Cortex_Both	No	Not_Applicable
Pineda_MC_210910_MCX_ALS_136_snRNA-C7	Pineda_2024_MC_Control_ALS	https://doi.org/10.1016/j.cell.2024.02.031	C9ALS	70.00	Adult	Female	Homo_Sapiens	Brain	Motor_Cortex	Both	Brain_Motor_Cortex_Both	No	Not_Applicable
Pineda_MC_210910_MCX_ALS_137_snRNA-C8	Pineda_2024_MC_Control_ALS	https://doi.org/10.1016/j.cell.2024.02.031	C9ALS	68.00	Adult	Male	Homo_Sapiens	Brain	Motor_Cortex	Both	Brain_Motor_Cortex_Both	No	Not_Applicable
Pineda_MC_210910_MCX_ALS_138_snRNA-C9	Pineda_2024_MC_Control_ALS	https://doi.org/10.1016/j.cell.2024.02.031	C9ALS	67.00	Adult	Female	Homo_Sapiens	Brain	Motor_Cortex	Both	Brain_Motor_Cortex_Both	No	Not_Applicable
Pineda_MC_210910_MCX_ALS_139_snRNA-D6	Pineda_2024_MC_Control_ALS	https://doi.org/10.1016/j.cell.2024.02.031	C9ALS	70.00	Adult	Female	Homo_Sapiens	Brain	Motor_Cortex	Both	Brain_Motor_Cortex_Both	No	Not_Applicable
Pineda_MC_210910_MCX_ALS_140_snRNA-D7	Pineda_2024_MC_Control_ALS	https://doi.org/10.1016/j.cell.2024.02.031	C9ALS	57.00	Adult	Female	Homo_Sapiens	Brain	Motor_Cortex	Both	Brain_Motor_Cortex_Both	No	Not_Applicable
Prashant_MC_CTRL_1	Prashant_2024_MC_Control	https://doi.org/10.1038/s41597-024-04117-y	Control	68	Adult	Male	Homo_Sapiens	Brain	Motor_Cortex	Not_Mentioned	Brain_Motor_Cortex_Not_Mentioned	No	Not_Applicable
Prashant_MC_CTRL_10	Prashant_2024_MC_Control	https://doi.org/10.1038/s41597-024-04117-y	Control	83	Adult	Female	Homo_Sapiens	Brain	Motor_Cortex	Not_Mentioned	Brain_Motor_Cortex_Not_Mentioned	No	Not_Applicable
Prashant_MC_CTRL_11	Prashant_2024_MC_Control	https://doi.org/10.1038/s41597-024-04117-y	Control	95	Adult	Female	Homo_Sapiens	Brain	Motor_Cortex	Not_Mentioned	Brain_Motor_Cortex_Not_Mentioned	No	Not_Applicable
Prashant_MC_CTRL_13	Prashant_2024_MC_Control	https://doi.org/10.1038/s41597-024-04117-y	Control	95	Adult	Male	Homo_Sapiens	Brain	Motor_Cortex	Not_Mentioned	Brain_Motor_Cortex_Not_Mentioned	No	Not_Applicable
Prashant_MC_CTRL_14	Prashant_2024_MC_Control	https://doi.org/10.1038/s41597-024-04117-y	Control	86	Adult	Male	Homo_Sapiens	Brain	Motor_Cortex	Not_Mentioned	Brain_Motor_Cortex_Not_Mentioned	No	Not_Applicable
Prashant_MC_CTRL_15	Prashant_2024_MC_Control	https://doi.org/10.1038/s41597-024-04117-y	Control	74	Adult	Male	Homo_Sapiens	Brain	Motor_Cortex	Not_Mentioned	Brain_Motor_Cortex_Not_Mentioned	No	Not_Applicable
Prashant_MC_CTRL_16	Prashant_2024_MC_Control	https://doi.org/10.1038/s41597-024-04117-y	Control	78	Adult	Female	Homo_Sapiens	Brain	Motor_Cortex	Not_Mentioned	Brain_Motor_Cortex_Not_Mentioned	No	Not_Applicable
Prashant_MC_CTRL_17	Prashant_2024_MC_Control	https://doi.org/10.1038/s41597-024-04117-y	Control	67	Adult	Female	Homo_Sapiens	Brain	Motor_Cortex	Not_Mentioned	Brain_Motor_Cortex_Not_Mentioned	No	Not_Applicable
Prashant_MC_CTRL_18	Prashant_2024_MC_Control	https://doi.org/10.1038/s41597-024-04117-y	Control	65	Adult	Male	Homo_Sapiens	Brain	Motor_Cortex	Not_Mentioned	Brain_Motor_Cortex_Not_Mentioned	No	Not_Applicable
Prashant_MC_CTRL_19	Prashant_2024_MC_Control	https://doi.org/10.1038/s41597-024-04117-y	Control	66	Adult	Male	Homo_Sapiens	Brain	Motor_Cortex	Not_Mentioned	Brain_Motor_Cortex_Not_Mentioned	No	Not_Applicable
Prashant_MC_CTRL_2	Prashant_2024_MC_Control	https://doi.org/10.1038/s41597-024-04117-y	Control	76	Adult	Male	Homo_Sapiens	Brain	Motor_Cortex	Not_Mentioned	Brain_Motor_Cortex_Not_Mentioned	No	Not_Applicable
Prashant_MC_CTRL_21	Prashant_2024_MC_Control	https://doi.org/10.1038/s41597-024-04117-y	Control	75	Adult	Male	Homo_Sapiens	Brain	Motor_Cortex	Not_Mentioned	Brain_Motor_Cortex_Not_Mentioned	No	Not_Applicable
Prashant_MC_CTRL_22	Prashant_2024_MC_Control	https://doi.org/10.1038/s41597-024-04117-y	Control	75	Adult	Male	Homo_Sapiens	Brain	Motor_Cortex	Not_Mentioned	Brain_Motor_Cortex_Not_Mentioned	No	Not_Applicable
Prashant_MC_CTRL_23	Prashant_2024_MC_Control	https://doi.org/10.1038/s41597-024-04117-y	Control	74	Adult	Female	Homo_Sapiens	Brain	Motor_Cortex	Not_Mentioned	Brain_Motor_Cortex_Not_Mentioned	No	Not_Applicable
Prashant_MC_CTRL_24	Prashant_2024_MC_Control	https://doi.org/10.1038/s41597-024-04117-y	Control	79	Adult	Female	Homo_Sapiens	Brain	Motor_Cortex	Not_Mentioned	Brain_Motor_Cortex_Not_Mentioned	No	Not_Applicable
Prashant_MC_CTRL_3	Prashant_2024_MC_Control	https://doi.org/10.1038/s41597-024-04117-y	Control	72	Adult	Male	Homo_Sapiens	Brain	Motor_Cortex	Not_Mentioned	Brain_Motor_Cortex_Not_Mentioned	No	Not_Applicable
Prashant_MC_CTRL_4	Prashant_2024_MC_Control	https://doi.org/10.1038/s41597-024-04117-y	Control	72	Adult	Male	Homo_Sapiens	Brain	Motor_Cortex	Not_Mentioned	Brain_Motor_Cortex_Not_Mentioned	No	Not_Applicable
Prashant_MC_CTRL_5	Prashant_2024_MC_Control	https://doi.org/10.1038/s41597-024-04117-y	Control	66	Adult	Male	Homo_Sapiens	Brain	Motor_Cortex	Not_Mentioned	Brain_Motor_Cortex_Not_Mentioned	No	Not_Applicable
Prashant_MC_CTRL_6	Prashant_2024_MC_Control	https://doi.org/10.1038/s41597-024-04117-y	Control	74	Adult	Female	Homo_Sapiens	Brain	Motor_Cortex	Not_Mentioned	Brain_Motor_Cortex_Not_Mentioned	No	Not_Applicable
Prashant_MC_CTRL_7	Prashant_2024_MC_Control	https://doi.org/10.1038/s41597-024-04117-y	Control	64	Adult	Male	Homo_Sapiens	Brain	Motor_Cortex	Not_Mentioned	Brain_Motor_Cortex_Not_Mentioned	No	Not_Applicable
Prashant_MC_CTRL_8	Prashant_2024_MC_Control	https://doi.org/10.1038/s41597-024-04117-y	Control	67	Adult	Male	Homo_Sapiens	Brain	Motor_Cortex	Not_Mentioned	Brain_Motor_Cortex_Not_Mentioned	No	Not_Applicable
Prashant_MC_CTRL_9	Prashant_2024_MC_Control	https://doi.org/10.1038/s41597-024-04117-y	Control	101	Adult	Female	Homo_Sapiens	Brain	Motor_Cortex	Not_Mentioned	Brain_Motor_Cortex_Not_Mentioned	No	Not_Applicable
Siletti_MC_H18_30_001	Silleti_2023_MC_Control	https://doi.org/10.1126/science.add7046	Control	60	Adult	Female	Homo_Sapiens	Brain	Motor_Cortex	Not_Mentioned	Brain_Motor_Cortex_Not_Mentioned	No	Not_Applicable
Siletti_MC_H18_30_002	Silleti_2023_MC_Control	https://doi.org/10.1126/science.add7046	Control	50	Adult	Male	Homo_Sapiens	Brain	Motor_Cortex	Not_Mentioned	Brain_Motor_Cortex_Not_Mentioned	No	Not_Applicable
Siletti_MC_H19_30_001	Silleti_2023_MC_Control	https://doi.org/10.1126/science.add7046	Control	42	Adult	Male	Homo_Sapiens	Brain	Motor_Cortex	Not_Mentioned	Brain_Motor_Cortex_Not_Mentioned	No	Not_Applicable
Siletti_MC_H19_30_002	Silleti_2023_MC_Control	https://doi.org/10.1126/science.add7046	Control	29	Adult	Male	Homo_Sapiens	Brain	Motor_Cortex	Not_Mentioned	Brain_Motor_Cortex_Not_Mentioned	No	Not_Applicable
Siletti_SC_10X218	Silleti_2023_SC_Control	https://doi.org/10.1126/science.add7046	Control	50	Adult	Male	Homo_Sapiens	Spinal_Cord	Not_Mentioned	Not_Mentioned	Spinal_Cord_Not_Mentioned_Not_Mentioned	No	Not_Applicable
Siletti_SC_10X222	Silleti_2023_SC_Control	https://doi.org/10.1126/science.add7046	Control	50	Adult	Male	Homo_Sapiens	Spinal_Cord	Not_Mentioned	Not_Mentioned	Spinal_Cord_Not_Mentioned_Not_Mentioned	No	Not_Applicable
Tansley_SC_SC004	Tansley_2022_SC_Control	https://doi.org/10.1038/s41467-022-28473-8	Control	39-68	Adult	Female	Homo_Sapiens	Spinal_Cord	Lumbar	Not_Mentioned	Spinal_Cord_Lumbar_Not_Mentioned	Yes	Microglia
Tansley_SC_SC005B	Tansley_2022_SC_Control	https://doi.org/10.1038/s41467-022-28473-8	Control	39-68	Adult	Male	Homo_Sapiens	Spinal_Cord	Lumbar	Not_Mentioned	Spinal_Cord_Lumbar_Not_Mentioned	Yes	Microglia
Tansley_SC_SC010	Tansley_2022_SC_Control	https://doi.org/10.1038/s41467-022-28473-8	Control	39-68	Adult	Female	Homo_Sapiens	Spinal_Cord	Lumbar	Not_Mentioned	Spinal_Cord_Lumbar_Not_Mentioned	Yes	Microglia
Velmeshev_MC_2	Velmeshev_2023_MC_Control	https://doi.org/10.1126/science.adf0834	Control	45	Adult	Female	Homo_Sapiens	Brain	Motor_Cortex	Not_Mentioned	Brain_Motor_Cortex_Not_Mentioned	No	Not_Applicable
Velmeshev_MC_20	Velmeshev_2023_MC_Control	https://doi.org/10.1126/science.adf0834	Control	53	Adult	Male	Homo_Sapiens	Brain	Motor_Cortex	Not_Mentioned	Brain_Motor_Cortex_Not_Mentioned	No	Not_Applicable
Velmeshev_MC_31	Velmeshev_2023_MC_Control	https://doi.org/10.1126/science.adf0834	Control	28	Adult	Male	Homo_Sapiens	Brain	Motor_Cortex	Not_Mentioned	Brain_Motor_Cortex_Not_Mentioned	No	Not_Applicable
Yadav_SC_1	Yadav_2023_SC_Control	https://doi.org/10.1016/j.neuron.2023.01.007	Control	50	Adult	Male	Homo_Sapiens	Spinal_Cord	Lumbar	Both	Spinal_Cord_Lumbar_Both	No	Not_Applicable
Yadav_SC_2	Yadav_2023_SC_Control	https://doi.org/10.1016/j.neuron.2023.01.007	Control	60	Adult	Male	Homo_Sapiens	Spinal_Cord	Lumbar	Both	Spinal_Cord_Lumbar_Both	No	Not_Applicable
Yadav_SC_3	Yadav_2023_SC_Control	https://doi.org/10.1016/j.neuron.2023.01.007	Control	65	Adult	Male	Homo_Sapiens	Spinal_Cord	Lumbar	Both	Spinal_Cord_Lumbar_Both	No	Not_Applicable
Yadav_SC_4	Yadav_2023_SC_Control	https://doi.org/10.1016/j.neuron.2023.01.007	Control	70	Adult	Male	Homo_Sapiens	Spinal_Cord	Lumbar	Both	Spinal_Cord_Lumbar_Both	No	Not_Applicable
Yadav_SC_5	Yadav_2023_SC_Control	https://doi.org/10.1016/j.neuron.2023.01.007	Control	75	Adult	Female	Homo_Sapiens	Spinal_Cord	Lumbar	Both	Spinal_Cord_Lumbar_Both	No	Not_Applicable
Yadav_SC_6	Yadav_2023_SC_Control	https://doi.org/10.1016/j.neuron.2023.01.007	Control	80	Adult	Female	Homo_Sapiens	Spinal_Cord	Lumbar	Both	Spinal_Cord_Lumbar_Both	No	Not_Applicable
Yadav_SC_7	Yadav_2023_SC_Control	https://doi.org/10.1016/j.neuron.2023.01.007	Control	80	Adult	Female	Homo_Sapiens	Spinal_Cord	Lumbar	Both	Spinal_Cord_Lumbar_Both	No	Not_Applicable
Zelic_SC_Donor_13085	Zelic_2025_SC_Control_ALS	https://doi.org/10.1016/j.immuni.2025.02.024	Control	57	Adult	Male	Homo_Sapiens	Spinal_Cord	Cervical	Not_Mentioned	Spinal_Cord_Cervical_Not_Mentioned	No	Not_Applicable
Zelic_SC_Donor_13122	Zelic_2025_SC_Control_ALS	https://doi.org/10.1016/j.immuni.2025.02.024	Control	68	Adult	Female	Homo_Sapiens	Spinal_Cord	Cervical	Not_Mentioned	Spinal_Cord_Cervical_Not_Mentioned	No	Not_Applicable
Zelic_SC_Donor_13394	Zelic_2025_SC_Control_ALS	https://doi.org/10.1016/j.immuni.2025.02.024	Control	65	Adult	Female	Homo_Sapiens	Spinal_Cord	Cervical	Not_Mentioned	Spinal_Cord_Cervical_Not_Mentioned	No	Not_Applicable
Zelic_SC_Donor_13446	Zelic_2025_SC_Control_ALS	https://doi.org/10.1016/j.immuni.2025.02.024	Control	59	Adult	Female	Homo_Sapiens	Spinal_Cord	Cervical	Not_Mentioned	Spinal_Cord_Cervical_Not_Mentioned	No	Not_Applicable
Zelic_SC_Donor_5724	Zelic_2025_SC_Control_ALS	https://doi.org/10.1016/j.immuni.2025.02.024	sALS	65	Adult	Male	Homo_Sapiens	Spinal_Cord	Cervical	Not_Mentioned	Spinal_Cord_Cervical_Not_Mentioned	No	Not_Applicable
Zelic_SC_Donor_5781	Zelic_2025_SC_Control_ALS	https://doi.org/10.1016/j.immuni.2025.02.024	sALS	61	Adult	Female	Homo_Sapiens	Spinal_Cord	Cervical	Not_Mentioned	Spinal_Cord_Cervical_Not_Mentioned	No	Not_Applicable
Zelic_SC_Donor_5867	Zelic_2025_SC_Control_ALS	https://doi.org/10.1016/j.immuni.2025.02.024	sALS	51	Adult	Male	Homo_Sapiens	Spinal_Cord	Cervical	Not_Mentioned	Spinal_Cord_Cervical_Not_Mentioned	No	Not_Applicable
Zelic_SC_Donor_5951	Zelic_2025_SC_Control_ALS	https://doi.org/10.1016/j.immuni.2025.02.024	sALS	54	Adult	Female	Homo_Sapiens	Spinal_Cord	Cervical	Not_Mentioned	Spinal_Cord_Cervical_Not_Mentioned	No	Not_Applicable
Zelic_SC_Donor_5974	Zelic_2025_SC_Control_ALS	https://doi.org/10.1016/j.immuni.2025.02.024	sALS	56	Adult	Male	Homo_Sapiens	Spinal_Cord	Cervical	Not_Mentioned	Spinal_Cord_Cervical_Not_Mentioned	No	Not_Applicable
Zelic_SC_Donor_6290	Zelic_2025_SC_Control_ALS	https://doi.org/10.1016/j.immuni.2025.02.024	fALS	61	Adult	Male	Homo_Sapiens	Spinal_Cord	Cervical	Not_Mentioned	Spinal_Cord_Cervical_Not_Mentioned	No	Not_Applicable
Zelic_SC_Donor_6314	Zelic_2025_SC_Control_ALS	https://doi.org/10.1016/j.immuni.2025.02.024	sALS	68	Adult	Female	Homo_Sapiens	Spinal_Cord	Cervical	Not_Mentioned	Spinal_Cord_Cervical_Not_Mentioned	No	Not_Applicable
Zelic_SC_Donor_6350	Zelic_2025_SC_Control_ALS	https://doi.org/10.1016/j.immuni.2025.02.024	C9ALS	60	Adult	Male	Homo_Sapiens	Spinal_Cord	Cervical	Not_Mentioned	Spinal_Cord_Cervical_Not_Mentioned	No	Not_Applicable
Zemke_MC_M1_donor1	Zemke_2023_MC_Control	https://doi.org/10.1038/s41586-023-06819-6	Control	42	Adult	Male	Homo_Sapiens	Brain	Motor_Cortex	Not_Mentioned	Brain_Motor_Cortex_Not_Mentioned	No	Not_Applicable
Zemke_MC_M1_donor2	Zemke_2023_MC_Control	https://doi.org/10.1038/s41586-023-06819-6	Control	29	Adult	Male	Homo_Sapiens	Brain	Motor_Cortex	Not_Mentioned	Brain_Motor_Cortex_Not_Mentioned	No	Not_Applicable
Zemke_MC_M1_donor3	Zemke_2023_MC_Control	https://doi.org/10.1038/s41586-023-06819-6	Control	58	Adult	Male	Homo_Sapiens	Brain	Motor_Cortex	Not_Mentioned	Brain_Motor_Cortex_Not_Mentioned	No	Not_Applicable
Zhang_SC_10	Zhang_2021_SC_Control	https://doi.org/10.7554/eLife.92046	Control	46	Adult	Male	Homo_Sapiens	Spinal_Cord	Lumbar	Not_Mentioned	Spinal_Cord_Lumbar_Not_Mentioned	No	Not_Applicable
Zhang_SC_2	Zhang_2021_SC_Control	https://doi.org/10.7554/eLife.92046	Control	59	Adult	Male	Homo_Sapiens	Spinal_Cord	Lumbar	Not_Mentioned	Spinal_Cord_Lumbar_Not_Mentioned	No	Not_Applicable
Zhang_SC_3	Zhang_2021_SC_Control	https://doi.org/10.7554/eLife.92046	Control	50	Adult	Male	Homo_Sapiens	Spinal_Cord	Lumbar	Not_Mentioned	Spinal_Cord_Lumbar_Not_Mentioned	No	Not_Applicable
Zhang_SC_4	Zhang_2021_SC_Control	https://doi.org/10.7554/eLife.92046	Control	59	Adult	Male	Homo_Sapiens	Spinal_Cord	Lumbar	Not_Mentioned	Spinal_Cord_Lumbar_Not_Mentioned	No	Not_Applicable
Zhang_SC_5	Zhang_2021_SC_Control	https://doi.org/10.7554/eLife.92046	Control	49	Adult	Male	Homo_Sapiens	Spinal_Cord	Lumbar	Not_Mentioned	Spinal_Cord_Lumbar_Not_Mentioned	No	Not_Applicable
Zhang_SC_6	Zhang_2021_SC_Control	https://doi.org/10.7554/eLife.92046	Control	47	Adult	Male	Homo_Sapiens	Spinal_Cord	Lumbar	Not_Mentioned	Spinal_Cord_Lumbar_Not_Mentioned	No	Not_Applicable
Zhang_SC_7	Zhang_2021_SC_Control	https://doi.org/10.7554/eLife.92046	Control	51	Adult	Male	Homo_Sapiens	Spinal_Cord	Lumbar	Not_Mentioned	Spinal_Cord_Lumbar_Not_Mentioned	No	Not_Applicable
Zhang_SC_8	Zhang_2021_SC_Control	https://doi.org/10.7554/eLife.92046	Control	35	Adult	Male	Homo_Sapiens	Spinal_Cord	Lumbar	Not_Mentioned	Spinal_Cord_Lumbar_Not_Mentioned	No	Not_Applicable
Zhang_SC_9	Zhang_2021_SC_Control	https://doi.org/10.7554/eLife.92046	Control	38	Adult	Male	Homo_Sapiens	Spinal_Cord	Lumbar	Not_Mentioned	Spinal_Cord_Lumbar_Not_Mentioned	No	Not_Applicable

## Sheet: CSF_Sample_Metadata_Concentr
Sample_ID	Status	Age_at_Sampling	Sex	LRP2	CNP	MBP	NEFL	NEFH
CSF_C9ALS_1	C9ALS	47.5	Male	6.36076
CSF_C9ALS_2	C9ALS	56.2	Male	4.02739	14.9055	14.2372	11868.8	3770.64
CSF_C9ALS_3	C9ALS	70.1	Male	3.77705
CSF_C9ALS_4	C9ALS	41.4	Male	3.42703
CSF_C9ALS_5	C9ALS	53.3	Male	3.13322	9.84991	8.00414	9251	2871
CSF_C9ALS_6	C9ALS	62.6	Male	2.79545		10.5884	17621	3222
CSF_C9ALS_7	C9ALS	55.3	Female	2.05359	7.12852	13.372
CSF_C9ALS_8	C9ALS	52.4	Fenale	1.47807	11.6425	11.6001	26859	4225.54
CSF_C9ALS_9	C9ALS	42.8	Female		7.65437		31672	6121.42
CSF_C9ALS_10	C9ALS	53.9	Female		8.94715		21044	5963
CSF_C9ALS_11	C9ALS	59.3	Male		7.39856	14.6354	16769.3	3623.34
CSF_C9ALS_12	C9ALS	54.9	Male		8.67736		8190.03	2716.27
CSF_C9ALS_13	C9ALS	46.8	Male			8.41244	8153.75	4178.56
CSF_C9ALS_14	C9ALS	51.6	Female		6.81101	2.26975
CSF_C9ALS_15	C9ALS	56.6	Male		16.6891
CSF_Control_1	Control	78	Female	4.72845
CSF_Control_2	Control	66.5	Male	4.04864	8.58468	3.1841
CSF_Control_3	Control	49	Male	3.85881	6.67491	2.68365
CSF_Control_4	Control	70	Female	3.83929
CSF_Control_5	Control	64	Female	3.7912
CSF_Control_6	Control	69	Female	3.77824
CSF_Control_7	Control	Not_Mentioned	Male	3.51896
CSF_Control_8	Control	57	Male	3.44393
CSF_Control_9	Control	69	Male	3.43648
CSF_Control_10	Control	76	Female	3.06159
CSF_Control_11	Control	55.6	Male	3.01998	7.25065	5.30845
CSF_Control_12	Control	75	Male	2.937
CSF_Control_13	Control	41.3	Male	2.82799	6.55872	3.78675
CSF_Control_14	Control	63.9	Female	2.60814	5.4215	5.95405
CSF_Control_15	Control	26	Male	2.59942
CSF_Control_16	Control	56.4	Female	2.41602	10.0229	4.62553
CSF_Control_17	Control	40	Male	2.15149
CSF_Control_18	Control	28	Female	1.65193
CSF_Control_19	Control	50.11	Female		4.70844	8.81359
CSF_Control_20	Control	56.6	Male		5.24179
CSF_Control_21	Control	50.6	Female		8.53731	3.12991
CSF_Control_22	Control	41	Female		13.6539	5.28508
CSF_Control_23	Control	38	Male			3.14983
CSF_sALS_1	sALS	37.2	Male	5.76046
CSF_sALS_2	sALS	76.7	Male	5.10928	8.55947	9.55685	14132.4	1922.79
CSF_sALS_3	sALS	59.2	Male	5.06944	13.2223	5.47411	9936.46	1333.18
CSF_sALS_4_A	sALS	65.3	Male	4.7512		5.63776	1225.07	626.593
CSF_sALS_5	sALS	70.2	Female	4.73751	9.63639	6.24604	11921.2	2193.66
CSF_sALS_6	sALS	75.9	Male	4.59487	15.2908	8.6854	10905	3858
CSF_sALS_7	sALS	49.2	Male	4.37729	14.5074	6.26625	3854.77	1944.82
CSF_sALS_8	sALS	45.8	Male	4.25745		8.01761	3223.88	692.053
CSF_sALS_9	sALS	79.6	Female	4.17608		5.58826	6609.32	1090.89
CSF_sALS_10_A	sALS	47.4	Male	4.10721	13.5003	7.33838	7138.84	4188.09
CSF_sALS_11_B	sALS	65.3	Male	4.05788		5.63776	1225.07	626.593
CSF_sALS_12	sALS	55.9	Female	4.0045		7.43267	6195.48
CSF_sALS_13	sALS	67	Male	3.86401			10303.3	4437.55
CSF_sALS_14_B	sALS	47.4	Male	3.7231	13.5003	7.33838	7138.84	4188.09
CSF_sALS_15	sALS	72.3	Male	3.7114		7.25884	4875.57	2621.26
CSF_sALS_16	sALS	Not_Mentioned	Male	3.70289
CSF_sALS_17	sALS	69.6	Female			13.9636	19930.8	2923.48
CSF_sALS_18	sALS	69.1	Female	3.47457		3.41932	904.404	382.75
CSF_sALS_19	sALS	Not_Mentioned	Male	3.45139
CSF_sALS_20	sALS	51.3	Female	2.65969	4.24852	4.87839	1640.2	93.9253
CSF_sALS_21	sALS	57.6	Female		13.9005	10.0601	24845.7	3564.94
CSF_sALS_22	sALS	66.6	Male			9.20188	15905.1	2671.16
CSF_sALS_23	sALS	62.2	Female			8.95291	15783	5020.14
CSF_sALS_24	sALS	65.2	Female		8.9594	8.08751	15313.4	3575.08
CSF_sALS_25	sALS	60.7	Female		10.7934	9.98718	12972.7	5234.9
CSF_sALS_26	sALS	58.3	Male			11.709	12785	7217.61
CSF_sALS_27	sALS	59.3	Female		7.54593		8347.22	2810.67
CSF_sALS_28	sALS	62.7	Female		5.61439		7558	1899
CSF_sALS_29	sALS	72.8	Female			8.90301	6353.83	1287.52
CSF_sALS_30	sALS	57.4	Female		5.37255		6336	2376
CSF_sALS_31	sALS	51	Male		8.50203		6258	2299
CSF_sALS_32	sALS	70.8	Female			7.61592	5466.51	3404.91
CSF_sALS_33	sALS	69.9	Female		5.83638		3668.03	2304.76
CSF_sALS_34	sALS	65.5	Female		15.1568	4.74124	2061.55	1678.09
CSF_sALS_35	sALS	53.2	Male		10.4581		1205.85	349
CSF_sALS_36	sALS	53.4	Male		8.78004

## Sheet: MC_SC_Oligos_Subclusters
gene	logfoldchanges	pvals	pvals_adj	scores	cluster
FRY	4.64858	0	0	122.641	Olig_1
CNTN1	5.01514	0	0	114.472	Olig_1
ERBB4	2.07746	0	0	108.985	Olig_1
FCHSD2	2.46194	0	0	92.4216	Olig_1
GRIK2	3.45029	0	0	89.1187	Olig_1
LUZP2	4.016	0	0	88.7154	Olig_1
CTNND2	1.85677	0	0	87.952	Olig_1
LSAMP	1.44079	0	0	87.7619	Olig_1
NLGN1	1.81182	0	0	86.0795	Olig_1
TNIK	1.90674	0	0	79.2083	Olig_1
SGCZ	3.35976	0	0	73.8996	Olig_1
KANK1	1.51026	0	0	69.7139	Olig_1
SIK3	0.75877	0	0	64.3763	Olig_1
CSMD3	2.15928	0	0	63.6062	Olig_1
KCNK10	2.60055	0	0	61.5899	Olig_1
OPALIN	1.53731	0	0	61.3617	Olig_1
FUT9	1.45494	0	0	59.3876	Olig_1
AUTS2	1.01863	0	0	59.1127	Olig_1
ZFPM2	3.04367	0	0	59.0839	Olig_1
LRRC7	1.50195	0	0	58.6496	Olig_1
NFASC	0.942559	0	0	57.9754	Olig_1
PTN	1.43529	0	0	57.6351	Olig_1
FRMD4A	1.60693	0	0	55.1385	Olig_1
TMEM132B	3.21593	0	0	52.7498	Olig_1
NAV3	1.32754	0	0	51.5382	Olig_1
PTK2	0.619668	0	0	51.5024	Olig_1
ANK3	0.743884	0	0	51.2614	Olig_1
PPP3CA	1.46847	0	0	51.1704	Olig_1
PLCB1	2.93579	0	0	50.8323	Olig_1
EMC10	1.41685	0	0	50.5111	Olig_1
KCNMB4	1.20635	0	0	50.3806	Olig_1
HHIP	1.0424	0	0	49.6944	Olig_1
ATRNL1	2.93702	0	0	49.2406	Olig_1
TTLL7	0.582283	0	0	47.4172	Olig_1
PCDH7	3.33368	0	0	47.0486	Olig_1
AMER2	0.890508	0	0	46.9849	Olig_1
NEDD4L	1.68684	0	0	46.9237	Olig_1
PHYHIPL	0.982673	0	0	45.1202	Olig_1
LHFPL3	2.43141	0	0	45.1102	Olig_1
FUT8	0.579008	0	0	44.1552	Olig_1
PTMA	0.819071	0	0	42.6361	Olig_1
PRKD1	1.36505	0	0	42.4972	Olig_1
SEMA3E	3.97148	0	0	42.4291	Olig_1
FIGN	1.5006	0	0	41.1556	Olig_1
CD9	1.04941	0	0	41.1057	Olig_1
RRAS2	3.75101	0	0	40.863	Olig_1
GUCY1A2	2.8396	0	0	40.5692	Olig_1
GPRC5B	0.687391	0	0	40.5534	Olig_1
PIP5K1B	3.70622	0	0	40.5403	Olig_1
FYN	0.836559	0	0	40.3416	Olig_1
ARAP2	0.552135	0	0	40.0846	Olig_1
DPP10	1.60101	0	0	39.5632	Olig_1
PCDH9	0.455452	0	0	38.1525	Olig_1
TMPRSS5	1.64462	0	0	37.9303	Olig_1
BIN1	0.725896	0	0	37.9045	Olig_1
TMEM123	1.01984	0	0	37.8188	Olig_1
SMOC1	1.31007	0	0	37.7108	Olig_1
NCAM2	0.536363	3.79457e-307	4.27542e-305	37.4623	Olig_1
PHLPP1	0.462679	3.28114e-306	3.66687e-304	37.4047	Olig_1
TIAM1	0.971804	2.81183e-303	3.11705e-301	37.2238	Olig_1
CSMD2	1.18725	6.55369e-302	7.20696e-300	37.1392	Olig_1
CLIC4	0.741091	7.66391e-286	8.04184e-284	36.13	Olig_1
PIP4K2A	0.346319	2.00579e-270	2.04234e-268	35.1345	Olig_1
MPZL1	3.22632	2.28033e-269	2.30481e-267	35.0653	Olig_1
LRRTM4	1.33676	2.31013e-266	2.30109e-264	34.8675	Olig_1
GRIA4	0.907244	2.21197e-260	2.15643e-258	34.4706	Olig_1
ITGB8	0.740453	9.59227e-259	9.28558e-257	34.3612	Olig_1
TCF12	0.381772	8.20407e-255	7.83147e-253	34.0969	Olig_1
PLLP	0.723321	1.77393e-253	1.68168e-251	34.0067	Olig_1
LPAR1	0.576263	9.68758e-253	9.12092e-251	33.9568	Olig_1
PBX1	0.835803	3.01709e-252	2.82129e-250	33.9233	Olig_1
RHOBTB3	0.977107	6.08217e-246	5.5737e-244	33.4931	Olig_1
ARHGEF12	1.16799	1.81855e-240	1.65548e-238	33.1148	Olig_1
KCNH8	0.636796	5.74408e-239	5.16066e-237	33.0105	Olig_1
EML5	1.78081	6.19593e-238	5.53047e-236	32.9384	Olig_1
GRM8	3.23651	3.82276e-234	3.34698e-232	32.6726	Olig_1
PPP1R9A	0.647261	1.10275e-230	9.53362e-229	32.4281	Olig_1
JMJD1C	0.497535	8.97286e-230	7.66093e-228	32.3635	Olig_1
KAT2B	0.640442	2.42206e-229	2.05516e-227	32.3328	Olig_1
NFIA	0.566861	7.55765e-227	6.29621e-225	32.1548	Olig_1
PLEKHA5	1.21527	1.53564e-224	1.264e-222	31.9893	Olig_1
LRP1B	0.667656	1.15547e-223	9.3983e-222	31.9262	Olig_1
CREB5	0.593918	7.63426e-223	6.17297e-221	31.8671	Olig_1
ANK2	0.381283	1.85722e-221	1.48427e-219	31.7669	Olig_1
SGK1	0.645399	2.16828e-221	1.72284e-219	31.762	Olig_1
ADAMTS17	2.57144	5.4547e-218	4.28459e-216	31.5148	Olig_1
EXOC6B	0.424192	1.12533e-216	8.73939e-215	31.4187	Olig_1
GOLGA7	0.997945	5.39004e-215	4.13919e-213	31.2954	Olig_1
REEP3	0.729025	6.7226e-211	5.10546e-209	30.9929	Olig_1
PDE7A	0.838015	2.92018e-208	2.16977e-206	30.7965	Olig_1
CNP	0.569606	5.47655e-206	4.04735e-204	30.6262	Olig_1
CCNH	0.580878	5.65611e-206	4.15769e-204	30.6252	Olig_1
PTPN13	0.737705	3.90535e-203	2.85548e-201	30.4112	Olig_1
KCTD8	0.734282	2.24846e-199	1.59316e-197	30.1255	Olig_1
TRIM2	0.56853	6.86046e-197	4.81143e-195	29.9352	Olig_1
CDH19	0.70104	1.94294e-196	1.35572e-194	29.9004	Olig_1
HIPK2	0.457727	8.3394e-194	5.76047e-192	29.6972	Olig_1
ARHGAP32	0.931452	3.55098e-190	2.41642e-188	29.4148	Olig_1
CCP110	0.634075	1.69787e-186	1.12207e-184	29.1257	Olig_1
TCF4	0.422693	1.0802e-185	7.10452e-184	29.0622	Olig_1
DOCK4	0.415466	1.67942e-185	1.0993e-183	29.047	Olig_1
ANKRD44	0.60509	2.25863e-177	1.40485e-175	28.3961	Olig_1
SLC2A13	2.31756	2.86717e-174	1.7286e-172	28.1436	Olig_1
SLC24A2	0.324068	3.06101e-173	1.82942e-171	28.0595	Olig_1
ZNF638	0.329411	1.15686e-169	6.76691e-168	27.7647	Olig_1
ADCY9	1.74004	8.85596e-164	5.0512e-162	27.2731	Olig_1
ASTN1	1.54422	8.21544e-159	4.49918e-157	26.851	Olig_1
UNC5C	0.354832	6.40819e-157	3.4817e-155	26.6885	Olig_1
MED13L	0.480355	4.9615e-154	2.64344e-152	26.4384	Olig_1
MAP4K5	0.345678	3.08406e-147	1.57597e-145	25.8408	Olig_1
UST	3.10302	4.52021e-147	2.30129e-145	25.8261	Olig_1
RUNX1T1	1.55503	1.45421e-146	7.37621e-145	25.7808	Olig_1
TPPP	0.692508	1.79108e-146	9.05153e-145	25.7728	Olig_1
KCNMA1	1.53572	4.21033e-144	2.11223e-142	25.5604	Olig_1
PDE4DIP	0.712839	1.35725e-139	6.63942e-138	25.1516	Olig_1
PPFIA2	0.512432	6.3215e-138	3.07051e-136	24.9987	Olig_1
EEF1A1	0.682506	1.1383e-137	5.49019e-136	24.9752	Olig_1
TBC1D9	3.96101	1.29643e-137	6.23104e-136	24.97	Olig_1
LPGAT1	0.390831	4.51193e-136	2.14605e-134	24.8276	Olig_1
IL6ST	0.734002	6.26718e-136	2.97064e-134	24.8144	Olig_1
TJP2	0.959769	9.63873e-136	4.55306e-134	24.7971	Olig_1
NOVA1	0.428339	4.569e-135	2.13624e-133	24.7344	Olig_1
PCDH10	0.988584	2.47709e-134	1.14647e-132	24.666	Olig_1
DCC	1.20478	7.55532e-134	3.48508e-132	24.6208	Olig_1
KIAA0930	0.632969	1.77649e-133	8.1671e-132	24.5862	Olig_1
PARD3	1.10629	7.58688e-133	3.45329e-131	24.5271	Olig_1
SCD5	0.327353	6.32026e-131	2.85784e-129	24.3465	Olig_1
RAPGEF6	0.613563	3.58955e-129	1.60201e-127	24.1803	Olig_1
ABHD17B	0.578314	1.19296e-128	5.30693e-127	24.1306	Olig_1
CORO1C	0.716927	4.65005e-128	2.05529e-126	24.0743	Olig_1
EPB41L4A	1.04628	1.16218e-127	5.12031e-126	24.0363	Olig_1
PCDH17	0.797641	1.61744e-127	7.10331e-126	24.0225	Olig_1
AMD1	0.524377	2.09128e-126	9.155e-125	23.9159	Olig_1
ADARB2	0.557591	3.40697e-125	1.48203e-123	23.7992	Olig_1
NOL4	2.97833	2.04699e-124	8.8484e-123	23.7238	Olig_1
SLC12A2	0.400412	2.55066e-123	1.09225e-121	23.6175	Olig_1
TMOD1	1.78712	4.02515e-122	1.713e-120	23.5006	Olig_1
MAP4K3	0.531994	2.18817e-121	9.19834e-120	23.4285	Olig_1
GOLIM4	1.10591	6.39938e-119	2.62585e-117	23.1854	Olig_1
GRID2	0.677809	1.78416e-118	7.29915e-117	23.1412	Olig_1
GTF2F2	0.899272	8.60462e-117	3.46859e-115	22.9734	Olig_1
RICTOR	0.384133	1.05793e-116	4.25212e-115	22.9644	Olig_1
MEGF9	0.50105	1.3335e-116	5.3441e-115	22.9543	Olig_1
ADD3	0.483786	1.6047e-116	6.41227e-115	22.9463	Olig_1
EVI2A	0.732189	3.86638e-116	1.5405e-114	22.908	Olig_1
STIM1	2.28365	6.35779e-116	2.51857e-114	22.8863	Olig_1
DISC1	0.905316	8.16345e-116	3.22456e-114	22.8754	Olig_1
LCORL	0.620665	3.68929e-115	1.44894e-113	22.8095	Olig_1
ASXL3	0.934752	8.94198e-115	3.49194e-113	22.7707	Olig_1
NTRK2	0.750877	1.07357e-111	4.13371e-110	22.4578	Olig_1
OPCML	1.67567	1.61746e-110	6.176e-109	22.3369	Olig_1
CSRNP3	0.934555	4.5223e-110	1.71722e-108	22.291	Olig_1
BCHE	1.67796	1.20028e-109	4.53271e-108	22.2472	Olig_1
SETD5	0.47127	1.54722e-109	5.82686e-108	22.2358	Olig_1
MAML2	0.576621	1.75726e-109	6.5998e-108	22.2301	Olig_1
MAN1A2	0.616578	4.94915e-109	1.84867e-107	22.1836	Olig_1
CD81	0.690951	1.53731e-106	5.69594e-105	21.9239	Olig_1
RAPGEF2	0.493246	8.3783e-106	3.07936e-104	21.8466	Olig_1
FGF12	1.7552	1.49702e-105	5.48749e-104	21.82	Olig_1
APOD	0.481335	3.0526e-105	1.11302e-103	21.7874	Olig_1
FOXN3	0.661795	1.53439e-104	5.55046e-103	21.7134	Olig_1
IGF2BP2	3.60473	1.74641e-104	6.30082e-103	21.7074	Olig_1
CHD7	0.419603	1.98479e-103	7.12348e-102	21.5954	Olig_1
NFIB	0.539565	4.73243e-102	1.68966e-100	21.4483	Olig_1
LRIG3	1.36646	1.08355e-101	3.85866e-100	21.4098	Olig_1
ANKRD28	0.407897	1.17298e-101	4.16637e-100	21.4061	Olig_1
KTN1	0.431081	1.43767e-101	5.09337e-100	21.3966	Olig_1
NOTCH2	3.0976	4.92158e-101	1.72582e-99	21.3391	Olig_1
APCDD1	1.24566	5.75247e-101	2.01205e-99	21.3318	Olig_1
WWP1	0.54412	7.10658e-101	2.47937e-99	21.3219	Olig_1
MEIS2	0.502913	1.93165e-100	6.72214e-99	21.2751	Olig_1
TAOK3	0.425021	5.75163e-98	1.97162e-96	21.0062	Olig_1
SEMA3D	4.7481	6.94236e-97	2.36212e-95	20.8876	Olig_1
FBXL7	0.346941	1.47821e-96	4.98025e-95	20.8515	Olig_1
EVI5	0.447682	2.39063e-96	8.03462e-95	20.8285	Olig_1
PTGDS	0.550257	2.38885e-95	7.97017e-94	20.7179	Olig_1
ETV6	0.987703	2.40375e-94	7.96192e-93	20.6064	Olig_1
IKZF2	0.609809	4.46392e-94	1.46797e-92	20.5764	Olig_1
SUN2	0.463672	1.11286e-93	3.63357e-92	20.5321	Olig_1
GRIA2	0.435151	9.0316e-93	2.90066e-91	20.4301	Olig_1
RGCC	0.549181	1.7898e-92	5.70825e-91	20.3967	Olig_1
PIK3C2B	0.470981	2.80689e-92	8.93135e-91	20.3747	Olig_1
SOX6	1.49801	4.22497e-92	1.34126e-90	20.3546	Olig_1
DNER	0.458231	1.63885e-91	5.1669e-90	20.2881	Olig_1
RASGEF1B	0.829218	6.56538e-91	2.05576e-89	20.2197	Olig_1
UBE2E3	0.54054	2.45839e-90	7.66282e-89	20.1545	Olig_1
PPM1B	0.468642	1.67013e-89	5.19402e-88	20.0594	Olig_1
PPP2R2A	0.346223	1.89283e-89	5.87333e-88	20.0532	Olig_1
SFRP1	1.46823	2.5771e-88	7.97856e-87	19.9229	Olig_1
TCF7L2	0.931617	5.65971e-88	1.74436e-86	19.8835	Olig_1
KLHL32	0.304083	3.62575e-87	1.10755e-85	19.7901	Olig_1
RALYL	1.83304	1.16918e-86	3.54779e-85	19.731	Olig_1
CAMK2D	0.566645	9.55224e-86	2.8795e-84	19.6245	Olig_1
PTP4A2	0.533245	3.55091e-85	1.06807e-83	19.5576	Olig_1
TMEM108	1.62442	3.58967e-85	1.07737e-83	19.5571	Olig_1
GRIN2A	0.924664	4.16287e-85	1.24128e-83	19.5495	Olig_1
PLEKHA1	0.443457	2.31154e-84	6.86273e-83	19.4619	Olig_1
STARD13	0.414095	3.26752e-84	9.68002e-83	19.4441	Olig_1
VWA1	0.664075	4.93028e-83	1.4328e-81	19.3044	Olig_1
AASS	0.479974	2.90517e-82	8.3545e-81	19.2126	Olig_1
PHLDB1	0.329654	5.25607e-81	1.49586e-79	19.0617	Olig_1
CDK19	0.283566	1.14314e-80	3.23991e-79	19.021	Olig_1
TBL1XR1	0.353208	2.49954e-80	7.05517e-79	18.9799	Olig_1
RBMS1	1.50698	5.88565e-79	1.64106e-77	18.8132	Olig_1
PSD3	0.328806	9.80376e-79	2.72247e-77	18.7861	Olig_1
PTAR1	0.712817	1.00394e-78	2.7823e-77	18.7849	Olig_1
SPOCK1	0.361526	3.07724e-78	8.49394e-77	18.7253	Olig_1
RDX	0.311856	6.00034e-78	1.64961e-76	18.6897	Olig_1
ZHX2	0.416509	6.37361e-78	1.74874e-76	18.6865	Olig_1
ADAMTS18	0.675588	1.57183e-77	4.27005e-76	18.6383	Olig_1
SYT11	0.371248	4.82386e-77	1.30273e-75	18.5782	Olig_1
KLF9	0.74893	5.9104e-74	1.54751e-72	18.1926	Olig_1
SCN3A	2.3025	2.4956e-72	6.47254e-71	17.9863	Olig_1
ZNF608	0.393254	3.61379e-72	9.33745e-71	17.9657	Olig_1
MYO9A	0.414115	1.60068e-70	4.05212e-69	17.7542	Olig_1
ZNF506	0.802886	2.31841e-70	5.84749e-69	17.7333	Olig_1
GPM6A	1.20127	3.03555e-70	7.64224e-69	17.7182	Olig_1
FRMD5	0.212724	3.26712e-70	8.2102e-69	17.714	Olig_1
GLRB	1.69447	5.69469e-69	1.41554e-67	17.5525	Olig_1
OLIG2	0.825822	7.76334e-69	1.92626e-67	17.5349	Olig_1
OLIG1	0.492057	8.09081e-69	2.00029e-67	17.5325	Olig_1
SORBS1	0.912366	6.37463e-68	1.56754e-66	17.4148	Olig_1
LRP4	0.654346	6.41153e-68	1.5738e-66	17.4144	Olig_1
CDC42SE2	0.428502	8.08558e-68	1.98118e-66	17.4012	Olig_1
GNG12	3.28757	1.35755e-67	3.30282e-66	17.3714	Olig_1
SLC35F1	1.88618	4.72432e-67	1.14131e-65	17.2997	Olig_1
LRCH3	0.356717	1.03286e-66	2.49082e-65	17.2546	Olig_1
RGL1	0.38513	1.91946e-66	4.59668e-65	17.2188	Olig_1
ABCA1	1.32597	1.95934e-66	4.68402e-65	17.2176	Olig_1
SRRM2	0.360973	8.96375e-66	2.12441e-64	17.1294	Olig_1
KIF19	1.06528	9.75323e-66	2.30754e-64	17.1244	Olig_1
SLC22A17	0.665324	2.10377e-65	4.96029e-64	17.0796	Olig_1
ARHGAP1	0.504324	3.09445e-65	7.27117e-64	17.0571	Olig_1
MAG	0.318224	4.18424e-65	9.78173e-64	17.0395	Olig_1
TOX	3.20474	5.04723e-64	1.16604e-62	16.8932	Olig_1
NBEA	0.399414	1.40116e-63	3.21541e-62	16.8329	Olig_1
ADAM23	1.02421	1.87571e-63	4.29725e-62	16.8156	Olig_1
SPTAN1	1.09152	1.60117e-62	3.60814e-61	16.688	Olig_1
FNIP2	0.390719	2.9356e-62	6.60437e-61	16.6518	Olig_1
TNRC6B	0.264182	3.28274e-62	7.36126e-61	16.6451	Olig_1
DUSP10	0.692858	2.26683e-61	5.04205e-60	16.5291	Olig_1
RAP1GDS1	0.288753	3.03829e-61	6.74708e-60	16.5114	Olig_1
TNS3	2.12243	7.43447e-61	1.64564e-59	16.4573	Olig_1
ELL2	0.283098	1.56828e-60	3.44922e-59	16.412	Olig_1
TBC1D14	0.819039	1.98224e-60	4.35269e-59	16.3978	Olig_1
MCU	0.910202	2.2099e-60	4.83714e-59	16.3912	Olig_1
ZBTB44	0.441396	2.74614e-60	6.00134e-59	16.378	Olig_1
DIP2C	0.2471	3.35749e-60	7.32571e-59	16.3658	Olig_1
PLCG2	0.517262	6.70869e-60	1.45914e-58	16.3236	Olig_1
GNAO1	0.305641	8.34825e-60	1.81002e-58	16.3102	Olig_1
RPS27	0.578861	3.20667e-58	6.8552e-57	16.0858	Olig_1
USP25	0.586111	8.40001e-58	1.78465e-56	16.0261	Olig_1
LRRC8D	0.44079	1.03766e-57	2.1978e-56	16.013	Olig_1
MAL	0.349635	1.08498e-57	2.29449e-56	16.0102	Olig_1
TRIO	0.575827	3.90495e-57	8.19504e-56	15.9303	Olig_1
LAMP1	0.448704	9.80593e-57	2.04231e-55	15.8726	Olig_1
PRTG	1.15261	6.24012e-56	1.29572e-54	15.7561	Olig_1
TPT1	0.581825	1.16383e-55	2.40933e-54	15.7166	Olig_1
DPYSL2	0.22714	1.49323e-55	3.08198e-54	15.7008	Olig_1
FAF1	0.239736	1.59348e-55	3.28395e-54	15.6967	Olig_1
NUCKS1	0.318628	3.8829e-55	7.94262e-54	15.6401	Olig_1
C1orf21	2.07369	7.70276e-54	1.54347e-52	15.4487	Olig_1
BROX	0.879508	1.61392e-53	3.22926e-52	15.4009	Olig_1
PHACTR3	0.267725	9.96107e-53	1.97868e-51	15.2828	Olig_1
KCTD4	1.99302	4.57347e-52	9.00672e-51	15.1831	Olig_1
ACER3	0.276595	4.67537e-52	9.19422e-51	15.1817	Olig_1
TMEM30A	0.579912	7.13817e-52	1.39973e-50	15.1539	Olig_1
ENAH	0.376573	1.51076e-50	2.92081e-49	14.952	Olig_1
THRA	0.624368	1.78819e-50	3.44264e-49	14.9408	Olig_1
SLC38A2	0.393031	1.97153e-50	3.78501e-49	14.9343	Olig_1
PARD3B	0.421564	3.71042e-50	7.10355e-49	14.8921	Olig_1
ATG4C	0.259595	9.26527e-50	1.76644e-48	14.8308	Olig_1
PKP4	0.255876	1.12245e-49	2.1311e-48	14.8179	Olig_1
MLLT3	0.474316	3.36559e-49	6.38115e-48	14.7439	Olig_1
ZNF280D	0.264515	1.3378e-48	2.53298e-47	14.6505	Olig_1
SRGAP1	0.435685	2.00195e-48	3.77487e-47	14.6231	Olig_1
ART3	1.50565	3.32338e-48	6.24087e-47	14.5885	Olig_1
TMEFF2	0.266071	4.31585e-48	8.07152e-47	14.5707	Olig_1
NEK7	0.36418	5.56367e-47	1.02932e-45	14.395	Olig_1
RBPJ	0.213838	2.39468e-46	4.39483e-45	14.2937	Olig_1
ZNF438	0.535507	3.41006e-46	6.24995e-45	14.2691	Olig_1
DENND5A	0.255472	4.27222e-46	7.8093e-45	14.2534	Olig_1
FADS1	0.530419	4.89268e-46	8.93158e-45	14.2439	Olig_1
BBX	0.255727	6.68438e-46	1.217e-44	14.2221	Olig_1
CDYL	0.538219	6.73846e-46	1.22522e-44	14.2215	Olig_1
BAZ2B	0.199496	8.80475e-46	1.5946e-44	14.2028	Olig_1
OSBPL1A	0.21037	1.45882e-45	2.62817e-44	14.1674	Olig_1
TRIM9	0.392099	2.46518e-45	4.4296e-44	14.1305	Olig_1
PDGFC	2.92375	3.33756e-45	5.97372e-44	14.1091	Olig_1
KIAA1958	0.335457	4.51682e-45	8.0634e-44	14.0878	Olig_1
SPTBN1	0.233458	5.1794e-45	9.22229e-44	14.0781	Olig_1
SOX5	1.28302	1.32223e-44	2.35127e-43	14.0117	Olig_1
STX6	0.741484	1.66093e-44	2.94595e-43	13.9955	Olig_1
BRSK1	0.550232	3.46655e-44	6.12484e-43	13.9431	Olig_1
GTF2I	0.249549	1.32254e-43	2.31883e-42	13.8472	Olig_1
DIP2B	0.179349	2.26649e-43	3.95371e-42	13.8085	Olig_1
CSRP1	0.353547	3.54101e-43	6.15357e-42	13.7763	Olig_1
SERINC3	0.461648	4.92556e-43	8.54883e-42	13.7524	Olig_1
CALM2	0.345924	1.23217e-42	2.12514e-41	13.6859	Olig_1
PDE1C	0.231874	1.53599e-42	2.63922e-41	13.6699	Olig_1
EDIL3	0.153147	2.99716e-42	5.10519e-41	13.6212	Olig_1
ANKHD1	0.427684	3.80407e-42	6.45565e-41	13.6038	Olig_1
SOX10	0.402079	3.85948e-42	6.5416e-41	13.6027	Olig_1
TBC1D5	0.212268	4.16754e-42	7.04637e-41	13.5971	Olig_1
PHTF2	0.363244	1.62159e-41	2.70187e-40	13.4973	Olig_1
AMOTL2	0.606805	2.23984e-41	3.72296e-40	13.4735	Olig_1
ASTN2	0.306679	3.34711e-41	5.54329e-40	13.4438	Olig_1
ATL1	0.338977	4.12502e-41	6.8152e-40	13.4283	Olig_1
PDE3B	1.92488	1.36461e-40	2.23575e-39	13.3395	Olig_1
FXYD6	2.3432	6.39766e-40	1.03951e-38	13.2238	Olig_1
NDRG2	0.429756	7.02151e-40	1.13818e-38	13.2168	Olig_1
LRRTM2	0.839179	1.61962e-39	2.61e-38	13.1537	Olig_1
SERINC5	0.248366	3.81303e-39	6.10885e-38	13.0889	Olig_1
GPHN	0.197365	4.78616e-39	7.65897e-38	13.0716	Olig_1
ARID2	0.288939	6.79158e-39	1.08555e-37	13.0449	Olig_1
QKI	0.156504	1.29975e-38	2.07026e-37	12.9954	Olig_1
HIVEP2	0.445115	1.75244e-38	2.78486e-37	12.9725	Olig_1
SLC44A5	1.86012	1.83139e-38	2.90696e-37	12.9691	Olig_1
AATK	0.218729	1.96601e-38	3.11704e-37	12.9637	Olig_1
CD200	0.728294	3.15766e-38	4.98911e-37	12.9273	Olig_1
GALNT2	0.508763	4.29191e-38	6.76566e-37	12.9037	Olig_1
ACAN	5.65195	7.57958e-38	1.19073e-36	12.8598	Olig_1
CFL2	0.429652	1.44647e-37	2.2646e-36	12.8097	Olig_1
SON	0.227819	1.64764e-37	2.56785e-36	12.7996	Olig_1
RFX3	0.331004	1.6806e-37	2.61625e-36	12.7981	Olig_1
RAB2A	0.303304	3.57931e-37	5.54692e-36	12.7392	Olig_1
SCD	0.226271	3.75391e-37	5.80442e-36	12.7355	Olig_1
MAP2	0.783595	5.14566e-37	7.93852e-36	12.7109	Olig_1
HNRNPU	0.237047	6.52536e-37	1.00445e-35	12.6923	Olig_1
UVRAG	0.214322	7.42085e-37	1.14102e-35	12.6822	Olig_1
NAALADL2	0.254242	8.19031e-37	1.25792e-35	12.6745	Olig_1
DBI	0.687586	1.13576e-36	1.73855e-35	12.6488	Olig_1
THBS4	0.716156	3.13414e-36	4.72389e-35	12.5688	Olig_1
ZDHHC11B	0.439355	3.28971e-36	4.95294e-35	12.565	Olig_1
SYT16	1.36467	3.43559e-36	5.16692e-35	12.5615	Olig_1
FAM110C	3.18193	3.98744e-36	5.97725e-35	12.5498	Olig_1
GLCCI1	0.557005	7.11444e-36	1.06299e-34	12.5038	Olig_1
FOXO3	0.345484	1.52098e-35	2.27008e-34	12.4433	Olig_1
MYO10	0.613897	3.36671e-35	5.01396e-34	12.3797	Olig_1
CLDND1	0.180199	5.82001e-35	8.64885e-34	12.3357	Olig_1
RIF1	0.28431	1.48772e-34	2.20131e-33	12.2599	Olig_1
FHOD3	2.13628	2.1484e-34	3.17547e-33	12.23	Olig_1
TRIM13	0.404704	2.2629e-34	3.34112e-33	12.2258	Olig_1
SRPK2	0.178572	2.45457e-34	3.61248e-33	12.2192	Olig_1
SCARB1	0.572342	3.33376e-34	4.89071e-33	12.1943	Olig_1
STAG1	0.254779	3.94684e-34	5.77777e-33	12.1805	Olig_1
COL11A1	2.04747	4.02805e-34	5.89038e-33	12.1789	Olig_1
DAAM2	0.192918	1.21151e-33	1.76226e-32	12.0887	Olig_1
MUSK	0.698235	2.28278e-33	3.31353e-32	12.0366	Olig_1
APP	0.148216	6.62127e-33	9.53047e-32	11.9484	Olig_1
SOX8	0.509241	1.56763e-32	2.24231e-31	11.8765	Olig_1
PLEKHH2	0.51047	2.1577e-32	3.07993e-31	11.8498	Olig_1
DEPTOR	0.307596	2.54312e-32	3.62257e-31	11.836	Olig_1
TBC1D8	0.948331	2.59943e-32	3.69894e-31	11.8342	Olig_1
RERE	0.178616	3.11337e-32	4.41199e-31	11.819	Olig_1
SCARB2	0.205919	5.20443e-32	7.35253e-31	11.7758	Olig_1
SERINC1	0.306846	9.31416e-32	1.30779e-30	11.7266	Olig_1
NCOA2	0.285313	1.25637e-31	1.76045e-30	11.7012	Olig_1
PLEKHG3	0.306974	1.59918e-31	2.23625e-30	11.6807	Olig_1
CLMN	0.222374	1.8126e-31	2.52955e-30	11.6701	Olig_1
ITM2B	0.241759	2.56771e-31	3.57244e-30	11.6404	Olig_1
PDLIM3	1.36542	3.15582e-31	4.38624e-30	11.6228	Olig_1
KIF2A	0.303967	6.24867e-31	8.62391e-30	11.5643	Olig_1
GPBP1	0.212449	9.23783e-31	1.27238e-29	11.5307	Olig_1
BACH2	0.257074	1.19163e-30	1.63637e-29	11.5088	Olig_1
SFSWAP	0.278485	1.32701e-30	1.82047e-29	11.4995	Olig_1
SYT9	0.305055	1.35379e-30	1.85535e-29	11.4978	Olig_1
COBL	0.225005	1.52012e-30	2.08123e-29	11.4878	Olig_1
HIVEP1	0.732255	1.88993e-30	2.58497e-29	11.4689	Olig_1
RNF150	2.10289	2.68483e-30	3.66856e-29	11.4385	Olig_1
ITPR2	0.550546	2.87474e-30	3.92026e-29	11.4326	Olig_1
WNK1	0.179635	4.16495e-30	5.66846e-29	11.4003	Olig_1
STK3	0.237467	4.19437e-30	5.70285e-29	11.3997	Olig_1
CAPRIN2	0.837551	4.40009e-30	5.97664e-29	11.3956	Olig_1
KANSL1L	0.275252	5.95992e-30	8.08737e-29	11.3691	Olig_1
SLITRK1	0.874378	1.1867e-29	1.59457e-28	11.3088	Olig_1
GLUD1	0.440551	1.29902e-29	1.74208e-28	11.3009	Olig_1
DISP1	1.45288	1.73895e-29	2.32525e-28	11.2752	Olig_1
RPL21	0.433411	1.89138e-29	2.52416e-28	11.2678	Olig_1
PSAP	0.232006	2.77516e-29	3.68573e-28	11.234	Olig_1
ATG16L2	1.09216	4.86466e-29	6.42977e-28	11.1843	Olig_1
PTBP2	0.151146	5.34417e-29	7.05e-28	11.176	Olig_1
SECISBP2L	0.16456	9.01408e-29	1.18345e-27	11.1295	Olig_1
FTO	0.19671	1.13719e-28	1.48591e-27	11.1088	Olig_1
SOS1	0.325024	1.31392e-28	1.71359e-27	11.0959	Olig_1
HNRNPK	0.308992	1.43848e-28	1.87426e-27	11.0878	Olig_1
TMBIM6	0.276235	1.51331e-28	1.96989e-27	11.0832	Olig_1
ADD1	0.227444	4.41692e-28	5.71705e-27	10.9869	Olig_1
SPTLC2	0.219185	4.85154e-28	6.26191e-27	10.9785	Olig_1
ABCG1	0.432755	8.86625e-28	1.14009e-26	10.9238	Olig_1
PEAK1	0.216579	1.07434e-27	1.37889e-26	10.9064	Olig_1
HMGB1	0.218428	1.16399e-27	1.49256e-26	10.8991	Olig_1
ZNF644	0.182264	1.24444e-27	1.59274e-26	10.893	Olig_1
TULP4	0.192587	1.46002e-27	1.86172e-26	10.8785	Olig_1
FXR1	0.245109	2.09732e-27	2.66942e-26	10.8454	Olig_1
GAB1	0.162735	2.14207e-27	2.72386e-26	10.8435	Olig_1
ALCAM	0.159477	2.25973e-27	2.87082e-26	10.8386	Olig_1
PDLIM5	0.555605	2.28017e-27	2.89411e-26	10.8377	Olig_1
ZBTB20	0.12111	2.3962e-27	3.03578e-26	10.8332	Olig_1
DCAF6	0.412507	2.96076e-27	3.74412e-26	10.8138	Olig_1
ZEB1	1.64843	3.2087e-27	4.05393e-26	10.8064	Olig_1
MMP16	1.83061	5.13402e-27	6.46266e-26	10.7632	Olig_1
SNX30	0.267732	5.81896e-27	7.31147e-26	10.7517	Olig_1
PID1	2.1178	7.11505e-27	8.90742e-26	10.7331	Olig_1
RNASE1	0.257191	7.81914e-27	9.77109e-26	10.7244	Olig_1
SLC44A1	0.0962797	7.8835e-27	9.82471e-26	10.7236	Olig_1
CREBBP	0.291014	9.72702e-27	1.21002e-25	10.7042	Olig_1
WIPI1	0.797028	1.07768e-26	1.3394e-25	10.6947	Olig_1
MYLIP	0.485186	1.08163e-26	1.3431e-25	10.6944	Olig_1
KAZN	0.282809	1.62217e-26	2.01067e-25	10.6567	Olig_1
KLHL24	0.221301	2.21643e-26	2.73738e-25	10.6276	Olig_1
NCL	0.431826	2.29473e-26	2.83154e-25	10.6244	Olig_1
KSR1	0.442273	2.33028e-26	2.87282e-25	10.623	Olig_1
ERBB3	0.230512	3.62977e-26	4.44696e-25	10.5815	Olig_1
UBE2H	0.272546	3.68295e-26	4.50809e-25	10.5802	Olig_1
APLP1	0.177243	3.70011e-26	4.52507e-25	10.5797	Olig_1
ZNF536	0.147312	3.72974e-26	4.55725e-25	10.579	Olig_1
RAD21	0.374514	3.74773e-26	4.57516e-25	10.5785	Olig_1
RPL13A	0.33854	4.13832e-26	5.02965e-25	10.5692	Olig_1
CCDC144A	0.358004	5.82814e-26	7.06469e-25	10.5371	Olig_1
RPL28	0.29806	6.00317e-26	7.27045e-25	10.5343	Olig_1
TPRN	0.519961	7.6222e-26	9.19884e-25	10.5118	Olig_1
PTPRD	0.117884	8.84348e-26	1.06261e-24	10.4978	Olig_1
CREBRF	0.355383	2.02973e-25	2.41774e-24	10.419	Olig_1
CALM1	0.200311	3.29894e-25	3.91262e-24	10.3727	Olig_1
KLHL5	0.393533	3.46412e-25	4.10498e-24	10.3681	Olig_1
PARP8	1.39057	3.77921e-25	4.46297e-24	10.3598	Olig_1
TMEM106B	0.378137	4.55927e-25	5.37494e-24	10.3418	Olig_1
RRBP1	0.358809	4.63149e-25	5.4554e-24	10.3403	Olig_1
BTD	0.389175	7.56133e-25	8.86844e-24	10.2932	Olig_1
LRP12	0.825815	8.81789e-25	1.03158e-23	10.2784	Olig_1
RPL41	0.366183	1.85093e-24	2.15618e-23	10.2067	Olig_1
IQCK	0.365537	1.98548e-24	2.30901e-23	10.1999	Olig_1
GPR155	0.545222	2.12596e-24	2.47028e-23	10.1932	Olig_1
PAIP2B	0.544644	2.61943e-24	3.04111e-23	10.1729	Olig_1
BCLAF1	0.283971	3.21256e-24	3.72029e-23	10.153	Olig_1
RNF217	0.448788	3.29978e-24	3.81808e-23	10.1504	Olig_1
TSPAN9	2.30694	4.76405e-24	5.50308e-23	10.1145	Olig_1
EPS15	0.152179	5.66547e-24	6.53883e-23	10.0975	Olig_1
PREX1	0.181488	6.79148e-24	7.82529e-23	10.0797	Olig_1
LARP6	0.310501	6.8616e-24	7.89946e-23	10.0787	Olig_1
DPY19L2	1.58577	7.72953e-24	8.89123e-23	10.067	Olig_1
HSP90B1	0.337265	1.20303e-23	1.37464e-22	10.0234	Olig_1
PPP1CB	0.458785	1.50158e-23	1.70726e-22	10.0015	Olig_1
ATP2B1	0.427344	1.67648e-23	1.9014e-22	9.99055	Olig_1
DLGAP1	0.868801	2.4578e-23	2.78066e-22	9.95256	Olig_1
RPL22	0.673686	2.88918e-23	3.26333e-22	9.93646	Olig_1
FTH1	0.174225	2.91939e-23	3.29474e-22	9.93542	Olig_1
TXNIP	0.28944	3.06649e-23	3.45791e-22	9.93052	Olig_1
CNTN3	1.30789	3.07578e-23	3.46554e-22	9.93022	Olig_1
MARCKS	1.08301	3.78103e-23	4.25319e-22	9.90961	Olig_1
PCDH15	1.48173	4.48221e-23	5.0337e-22	9.8926	Olig_1
EBF4	0.716846	6.12136e-23	6.86332e-22	9.86136	Olig_1
BCAN	1.70175	6.65596e-23	7.44449e-22	9.85295	Olig_1
GPR37	0.193507	8.23248e-23	9.16305e-22	9.83157	Olig_1
VEZF1	0.326137	8.91236e-23	9.90374e-22	9.82358	Olig_1
COLGALT2	0.170143	1.33375e-22	1.47141e-21	9.78287	Olig_1
KLF12	0.636392	1.40975e-22	1.55276e-21	9.77726	Olig_1
TTC8	1.02096	1.90832e-22	2.09686e-21	9.74656	Olig_1
WDR7	0.173003	2.04448e-22	2.24468e-21	9.73955	Olig_1
HSP90AB1	0.252501	4.15974e-22	4.54891e-21	9.66711	Olig_1
GAS6	1.1065	7.93813e-22	8.63955e-21	9.60073	Olig_1
GALNT13	0.225222	8.58673e-22	9.32331e-21	9.59263	Olig_1
USP3	0.502548	1.25205e-21	1.35198e-20	9.55365	Olig_1
PRKCE	0.332541	1.71129e-21	1.8392e-20	9.52124	Olig_1
PRICKLE1	2.46538	2.1847e-21	2.33521e-20	9.49583	Olig_1
CREG2	0.936416	2.4197e-21	2.58239e-20	9.48518	Olig_1
ZBED5	0.229022	2.65877e-21	2.83534e-20	9.47535	Olig_1
ARHGEF11	0.486213	2.76954e-21	2.95117e-20	9.47108	Olig_1
GFRA1	3.65204	3.17874e-21	3.38196e-20	9.45668	Olig_1
ZNF544	0.705506	5.71809e-21	6.05088e-20	9.39507	Olig_1
IPO8	0.513324	6.64625e-21	7.01684e-20	9.37922	Olig_1
NBPF14	2.73444	1.0353e-20	1.09135e-19	9.33237	Olig_1
TNRC6C	0.160422	1.09172e-20	1.14995e-19	9.32675	Olig_1
ARL6IP1	0.572391	1.15713e-20	1.21698e-19	9.32057	Olig_1
ENO4	0.263266	1.23453e-20	1.29739e-19	9.3137	Olig_1
ELP4	0.345217	1.90127e-20	1.99047e-19	9.26774	Olig_1
YWHAQ	0.214182	2.69338e-20	2.80692e-19	9.23051	Olig_1
TTC28	0.285194	3.5411e-20	3.67643e-19	9.20116	Olig_1
RB1CC1	0.245807	5.0844e-20	5.25095e-19	9.16221	Olig_1
EEF2	0.362845	5.53886e-20	5.71171e-19	9.15297	Olig_1
VCAN	1.52434	6.04035e-20	6.21953e-19	9.14361	Olig_1
YPEL2	0.18548	1.23225e-19	1.25937e-18	9.06621	Olig_1
ATG13	0.258876	1.72273e-19	1.75282e-18	9.02962	Olig_1
RCN1	2.53247	2.18779e-19	2.21617e-18	9.00343	Olig_1
ANKS1B	0.108099	2.39295e-19	2.42042e-18	8.99358	Olig_1
PNRC1	0.530399	2.53589e-19	2.56311e-18	8.98721	Olig_1
TTL	0.27553	2.63795e-19	2.66431e-18	8.98287	Olig_1
RPL19	0.32525	2.74013e-19	2.76345e-18	8.97869	Olig_1
RPL3	0.345709	3.43388e-19	3.45297e-18	8.95382	Olig_1
YPEL3	0.434215	6.41651e-19	6.38216e-18	8.88458	Olig_1
OLFML2B	2.17692	1.18147e-18	1.16587e-17	8.81645	Olig_1
SLC22A15	0.145494	1.22148e-18	1.20448e-17	8.81272	Olig_1
PPP1R16B	0.159276	1.41016e-18	1.38458e-17	8.79661	Olig_1
AGTPBP1	0.134319	1.73026e-18	1.69403e-17	8.77361	Olig_1
CD82	0.404955	2.23622e-18	2.18318e-17	8.74469	Olig_1
BCAR1	0.446142	2.64106e-18	2.5711e-17	8.72589	Olig_1
TMED7	0.534359	2.98004e-18	2.89495e-17	8.71221	Olig_1
ATF7IP	0.217114	4.60807e-18	4.44509e-17	8.66268	Olig_1
WLS	1.51389	5.14563e-18	4.95321e-17	8.6501	Olig_1
PPP1R21	0.162727	5.72812e-18	5.50236e-17	8.63785	Olig_1
REXO2	0.672693	5.83828e-18	5.60426e-17	8.63567	Olig_1
CXXC4	0.625613	5.89281e-18	5.65265e-17	8.63461	Olig_1
SMC5	0.249045	6.7957e-18	6.50513e-17	8.6183	Olig_1
RPLP1	0.254772	6.90705e-18	6.60712e-17	8.61644	Olig_1
PDE3A	2.19238	8.84862e-18	8.43503e-17	8.58801	Olig_1
ZNF704	0.151295	9.65854e-18	9.20071e-17	8.57794	Olig_1
JUND	0.233575	9.95454e-18	9.46956e-17	8.57447	Olig_1
AIDA	0.646072	1.19402e-17	1.13428e-16	8.55351	Olig_1
P2RX7	0.176788	1.43957e-17	1.36377e-16	8.53191	Olig_1
LGI3	0.319637	1.4979e-17	1.41611e-16	8.52731	Olig_1
CLCA4	0.473843	1.90266e-17	1.7926e-16	8.49959	Olig_1
SLC25A48	0.725231	1.9957e-17	1.87897e-16	8.49404	Olig_1
MGAT4A	0.395391	2.60734e-17	2.44645e-16	8.46293	Olig_1
CWF19L2	0.280998	3.25526e-17	3.04815e-16	8.43702	Olig_1
RPS27L	0.537263	5.73713e-17	5.343e-16	8.37051	Olig_1
PPP1CC	0.495532	6.36752e-17	5.91405e-16	8.35821	Olig_1
IMMP2L	0.262604	7.41134e-17	6.86961e-16	8.34028	Olig_1
VSTM2B	0.353288	1.40001e-16	1.28812e-15	8.26474	Olig_1
SET	0.434606	1.5187e-16	1.39639e-15	8.25502	Olig_1
RCBTB1	0.334999	1.58808e-16	1.45824e-15	8.24969	Olig_1
RPL18A	0.505426	1.78843e-16	1.64001e-15	8.23548	Olig_1
DENND2A	0.293188	2.14615e-16	1.9628e-15	8.21362	Olig_1
CREB1	0.307097	2.18146e-16	1.99377e-15	8.21166	Olig_1
VGLL4	0.281449	2.75213e-16	2.50535e-15	8.18372	Olig_1
RPS8	0.309024	2.92148e-16	2.65599e-15	8.17653	Olig_1
KHDRBS3	0.392946	3.2662e-16	2.96351e-15	8.16307	Olig_1
SATB1	1.28211	3.83104e-16	3.46685e-15	8.14379	Olig_1
CERS4	0.293905	4.11974e-16	3.7232e-15	8.13499	Olig_1
SREBF1	0.289779	4.50636e-16	4.06726e-15	8.12412	Olig_1
MXI1	0.153086	4.82904e-16	4.34709e-15	8.11572	Olig_1
PAG1	0.415728	5.94109e-16	5.32374e-15	8.09052	Olig_1
SLCO1A2	0.144709	6.43414e-16	5.76181e-15	8.0808	Olig_1
TIA1	0.388364	6.48973e-16	5.8078e-15	8.07975	Olig_1
TMPO	0.584955	7.26272e-16	6.49112e-15	8.06602	Olig_1
HNRNPA2B1	0.127864	8.32657e-16	7.42745e-15	8.0493	Olig_1
RPL32	0.313463	1.22843e-15	1.08731e-14	8.00157	Olig_1
DUSP7	0.698163	1.58221e-15	1.39507e-14	7.97035	Olig_1
RPL23A	0.38384	2.1186e-15	1.86085e-14	7.9342	Olig_1
RPS29	0.328066	2.41872e-15	2.12174e-14	7.91774	Olig_1
ZNF24	0.29992	2.42177e-15	2.12307e-14	7.91758	Olig_1
GLRX	0.769468	2.46949e-15	2.16352e-14	7.91515	Olig_1
RPS23	0.337594	3.30352e-15	2.88136e-14	7.87887	Olig_1
RPS27A	0.296634	3.75663e-15	3.27241e-14	7.86279	Olig_1
ZNF551	1.16861	5.11359e-15	4.43199e-14	7.82409	Olig_1
CNDP2	0.328823	5.33061e-15	4.61136e-14	7.81885	Olig_1
BRINP2	0.915605	5.33694e-15	4.61394e-14	7.81871	Olig_1
JAM3	0.126764	5.62502e-15	4.85078e-14	7.81208	Olig_1
RPS15	0.23241	6.86394e-15	5.90067e-14	7.78696	Olig_1
EPN2	0.122918	7.40593e-15	6.35864e-14	7.77735	Olig_1
CEP97	0.238223	7.71317e-15	6.60593e-14	7.7722	Olig_1
YWHAZ	0.23301	8.12246e-15	6.94349e-14	7.76565	Olig_1
CADM1	0.126914	9.02415e-15	7.69993e-14	7.7523	Olig_1
PAK1	0.366514	9.05048e-15	7.71761e-14	7.75193	Olig_1
CDC42BPA	0.0895359	9.05877e-15	7.7199e-14	7.75182	Olig_1
SUCLG2	0.352877	9.56846e-15	8.1492e-14	7.74486	Olig_1
CDKN2A	1.00724	1.0308e-14	8.76816e-14	7.7354	Olig_1
RPS28	0.321538	1.12024e-14	9.50542e-14	7.72481	Olig_1
CCNI	0.298962	1.55109e-14	1.30805e-13	7.68325	Olig_1
CECR2	0.189614	1.57349e-14	1.32613e-13	7.68141	Olig_1
PLCB4	2.10934	1.62283e-14	1.36688e-13	7.67745	Olig_1
LYPLAL1	0.222223	1.68441e-14	1.41614e-13	7.67268	Olig_1
EFNA1	0.45184	2.31763e-14	1.93197e-13	7.63165	Olig_1
RPL11	0.234181	2.34466e-14	1.95332e-13	7.63016	Olig_1
MYEF2	0.349784	2.83996e-14	2.35595e-13	7.60541	Olig_1
RPL34	0.335929	2.95701e-14	2.44862e-13	7.60019	Olig_1
SLITRK5	1.15563	3.30945e-14	2.7306e-13	7.5856	Olig_1
YIPF4	0.262241	3.52646e-14	2.90268e-13	7.57736	Olig_1
FOXN2	0.148268	3.87233e-14	3.18355e-13	7.56521	Olig_1
HDAC9	0.225456	4.04731e-14	3.32542e-13	7.55946	Olig_1
PRR18	0.317416	4.08279e-14	3.35257e-13	7.55833	Olig_1
C11orf71	0.791894	4.08933e-14	3.35594e-13	7.55812	Olig_1
SIPA1L1	0.1737	4.63245e-14	3.79259e-13	7.54188	Olig_1
STIM2	0.280946	5.26552e-14	4.30064e-13	7.52516	Olig_1
RPL27A	0.331549	5.37361e-14	4.38632e-13	7.52251	Olig_1
FAU	0.266963	6.2541e-14	5.09596e-13	7.50265	Olig_1
DEK	0.302586	7.40761e-14	6.02158e-13	7.48044	Olig_1
EIF1	0.175412	8.22567e-14	6.6708e-13	7.46666	Olig_1
CDK8	0.306882	9.4774e-14	7.66331e-13	7.44799	Olig_1
KMT2E	0.111017	1.05588e-13	8.52267e-13	7.43372	Olig_1
PIK3R1	0.151784	1.07783e-13	8.69477e-13	7.431	Olig_1
CPM	0.216966	1.09732e-13	8.84682e-13	7.42862	Olig_1
TSC22D4	0.179043	1.18338e-13	9.52941e-13	7.41863	Olig_1
ITFG1	0.130199	1.20252e-13	9.66656e-13	7.4165	Olig_1
MITF	0.193579	1.51474e-13	1.21479e-12	7.38586	Olig_1
TSC22D1	0.242419	1.57983e-13	1.26553e-12	7.38026	Olig_1
TMEM14B	0.407798	2.11632e-13	1.68448e-12	7.34123	Olig_1
POLR2F	0.135395	2.16757e-13	1.72427e-12	7.33803	Olig_1
STARD7	0.350627	2.16948e-13	1.72479e-12	7.33791	Olig_1
CDKN1B	0.414503	2.45095e-13	1.94071e-12	7.32157	Olig_1
MRPS6	1.49991	2.79665e-13	2.20808e-12	7.30384	Olig_1
PAX3	2.10043	2.90618e-13	2.29193e-12	7.29867	Olig_1
ANKRD50	0.852599	2.98608e-13	2.3509e-12	7.29502	Olig_1
CTNNA1	0.156408	2.99301e-13	2.355e-12	7.29471	Olig_1
RASAL1	0.336858	3.09423e-13	2.43186e-12	7.29023	Olig_1
TM9SF3	0.219603	3.14268e-13	2.46712e-12	7.28814	Olig_1
TMEM132C	0.356401	3.55424e-13	2.78068e-12	7.27154	Olig_1
HDAC11	0.317063	3.95645e-13	3.09007e-12	7.25704	Olig_1
DCBLD2	0.373225	4.42843e-13	3.45282e-12	7.24178	Olig_1
FAIM2	0.269552	5.70145e-13	4.43239e-12	7.20744	Olig_1
RCN2	0.302317	5.70413e-13	4.43239e-12	7.20737	Olig_1
PUM2	0.142009	6.03049e-13	4.67806e-12	7.19979	Olig_1
TSPAN3	0.396863	6.11027e-13	4.7346e-12	7.198	Olig_1
ARID1B	0.123818	6.25667e-13	4.83985e-12	7.19477	Olig_1
SHB	0.467884	6.31114e-13	4.87924e-12	7.19359	Olig_1
CADM4	0.28007	6.43873e-13	4.97229e-12	7.19085	Olig_1
MTDH	0.151005	7.88643e-13	6.07321e-12	7.16311	Olig_1
RPS19	0.26023	8.38172e-13	6.433e-12	7.15476	Olig_1
CREB3L2	0.279963	8.50505e-13	6.52402e-12	7.15276	Olig_1
TSPAN18	1.65006	8.52256e-13	6.5338e-12	7.15248	Olig_1
MDFI	2.87197	9.49373e-13	7.26215e-12	7.13765	Olig_1
KCND2	1.18419	1.0036e-12	7.6727e-12	7.13001	Olig_1
EPC1	0.17342	1.00449e-12	7.67524e-12	7.12989	Olig_1
PAN3	0.145324	1.00766e-12	7.69513e-12	7.12946	Olig_1
BAALC	0.595898	1.02847e-12	7.84972e-12	7.12664	Olig_1
ZNF488	0.563513	1.1703e-12	8.9075e-12	7.10883	Olig_1
MAN1A1	2.00536	1.32598e-12	1.00757e-11	7.09157	Olig_1
FADS2	0.435973	1.36079e-12	1.03288e-11	7.08799	Olig_1
GDE1	0.486473	1.60811e-12	1.21657e-11	7.06483	Olig_1
NFKBIA	0.599906	2.02241e-12	1.52329e-11	7.03293	Olig_1
AUH	0.175498	2.0328e-12	1.53028e-11	7.03222	Olig_1
KCTD1	0.461603	2.72965e-12	2.0459e-11	6.99098	Olig_1
PDIA3	0.314532	2.77227e-12	2.07671e-11	6.98881	Olig_1
CDC42EP4	1.41549	3.03772e-12	2.27061e-11	6.97597	Olig_1
GFAP	0.460209	3.36043e-12	2.50638e-11	6.96176	Olig_1
SPCS3	0.323072	3.94455e-12	2.93567e-11	6.93915	Olig_1
RPS26	0.422115	3.98227e-12	2.96214e-11	6.93781	Olig_1
ATF7	0.212865	4.85751e-12	3.60537e-11	6.90968	Olig_1
TTYH2	0.117913	5.45955e-12	4.04566e-11	6.89308	Olig_1
RPL9	0.32972	5.96484e-12	4.40821e-11	6.88049	Olig_1
ZNF706	0.196438	6.19764e-12	4.5778e-11	6.87503	Olig_1
RFFL	0.180579	6.4277e-12	4.74518e-11	6.86983	Olig_1
FMNL3	0.542186	6.53771e-12	4.82121e-11	6.86741	Olig_1
VMP1	0.153104	8.21036e-12	6.04173e-11	6.83483	Olig_1
FCHO2	0.279113	8.62757e-12	6.34535e-11	6.82772	Olig_1
KIAA1549	2.17492	8.96096e-12	6.5835e-11	6.82228	Olig_1
NDUFAF6	0.289797	9.93049e-12	7.28024e-11	6.80751	Olig_1
PLOD2	0.922907	1.13699e-11	8.29566e-11	6.788	Olig_1
NEO1	0.0892559	1.18883e-11	8.66013e-11	6.78156	Olig_1
XKR4	1.37536	1.38475e-11	1.00447e-10	6.75949	Olig_1
KCNIP1	1.78696	1.55994e-11	1.12858e-10	6.74221	Olig_1
TOM1L2	0.146709	1.61019e-11	1.16432e-10	6.7376	Olig_1
TTC21B	0.257488	1.77157e-11	1.27698e-10	6.72371	Olig_1
RBM39	0.11274	1.86568e-11	1.3427e-10	6.71617	Olig_1
FAM114A1	0.312379	2.03404e-11	1.46081e-10	6.70356	Olig_1
ZNF827	0.24851	2.10765e-11	1.51288e-10	6.69836	Olig_1
CHD6	0.14733	2.24053e-11	1.60659e-10	6.68942	Olig_1
PIAS1	0.185325	2.39735e-11	1.71635e-10	6.67951	Olig_1
ZNF516	2.26724	2.89484e-11	2.06285e-10	6.65182	Olig_1
FOXP1	0.159251	3.94117e-11	2.78966e-10	6.60627	Olig_1
RAB31	0.667674	4.94347e-11	3.48656e-10	6.57263	Olig_1
STRN	0.11769	5.00073e-11	3.52333e-10	6.57091	Olig_1
CD22	0.12353	5.44359e-11	3.8275e-10	6.55827	Olig_1
PCSK5	1.06101	6.03829e-11	4.23265e-10	6.54279	Olig_1
COL9A1	2.1584	6.43892e-11	4.50659e-10	6.53318	Olig_1
SMC4	0.433613	6.50953e-11	4.55138e-10	6.53154	Olig_1
SPEN	0.168239	7.4015e-11	5.15405e-10	6.51229	Olig_1
PTGES3	0.232137	8.37684e-11	5.81262e-10	6.49367	Olig_1
NIPBL	0.0967398	9.02625e-11	6.25062e-10	6.48242	Olig_1
WIPF1	0.144041	9.09554e-11	6.29319e-10	6.48127	Olig_1
ARSB	0.351984	9.34824e-11	6.46058e-10	6.47713	Olig_1
NINJ1	1.38434	1.06627e-10	7.3505e-10	6.45724	Olig_1
BEND7	1.79532	1.1746e-10	8.0811e-10	6.44258	Olig_1
JAK1	0.155272	1.20708e-10	8.28796e-10	6.43844	Olig_1
PYGO1	1.53904	1.22305e-10	8.38926e-10	6.43644	Olig_1
RAB3IP	0.266438	1.39642e-10	9.54988e-10	6.41628	Olig_1
HBS1L	0.125945	1.73445e-10	1.17912e-09	6.38318	Olig_1
ZNF281	0.367344	1.81642e-10	1.23362e-09	6.37611	Olig_1
PPM1H	0.118972	1.83064e-10	1.24267e-09	6.37492	Olig_1
CBLB	0.231887	1.85857e-10	1.261e-09	6.37259	Olig_1
GPCPD1	0.582789	1.89098e-10	1.28236e-09	6.36994	Olig_1
SMAD4	0.315792	1.98565e-10	1.34589e-09	6.36245	Olig_1
NCOR1	0.109968	2.13967e-10	1.44601e-09	6.35097	Olig_1
MCAM	0.27184	2.86595e-10	1.92831e-09	6.30586	Olig_1
ZDHHC11	0.453948	3.04267e-10	2.04521e-09	6.29659	Olig_1
RAPH1	0.428347	3.26358e-10	2.19048e-09	6.28571	Olig_1
LRIG1	0.238782	3.31615e-10	2.22469e-09	6.28323	Olig_1
SKP1	0.219667	3.7274e-10	2.49449e-09	6.26504	Olig_1
PAPOLA	0.177812	4.33458e-10	2.89379e-09	6.24148	Olig_1
MICU1	0.223723	4.59025e-10	3.0615e-09	6.23251	Olig_1
QSER1	0.317908	6.46752e-10	4.28859e-09	6.17859	Olig_1
CDK14	0.329363	6.99213e-10	4.63199e-09	6.16627	Olig_1
SKIL	0.444082	7.23735e-10	4.78752e-09	6.16081	Olig_1
ADAMTS6	2.00342	7.4048e-10	4.89122e-09	6.15719	Olig_1
SRSF1	0.42992	8.32255e-10	5.46853e-09	6.13865	Olig_1
N4BP2L1	0.314362	8.49692e-10	5.57511e-09	6.13535	Olig_1
LDHB	0.431942	9.05548e-10	5.93028e-09	6.12523	Olig_1
PDK4	0.268275	9.95884e-10	6.50948e-09	6.11007	Olig_1
PSAT1	0.232892	1.00784e-09	6.58448e-09	6.10816	Olig_1
ARHGAP5	0.137784	1.07829e-09	7.03476e-09	6.09737	Olig_1
CTSF	0.3967	1.09855e-09	7.16348e-09	6.09439	Olig_1
ZNF655	0.350545	1.1715e-09	7.6139e-09	6.0841	Olig_1
KAT6A	0.132816	1.17904e-09	7.65927e-09	6.08307	Olig_1
DIS3L2	0.143651	1.25554e-09	8.15243e-09	6.07298	Olig_1
EFCAB14	0.289986	1.41162e-09	9.13138e-09	6.05415	Olig_1
EEA1	0.177653	1.44064e-09	9.30593e-09	6.05087	Olig_1
SRP14	0.236237	1.64248e-09	1.05849e-08	6.02972	Olig_1
FANCL	0.129157	2.04758e-09	1.31278e-08	5.99399	Olig_1
SSH2	0.0878798	2.168e-09	1.38675e-08	5.98469	Olig_1
CLASP2	0.0845826	2.18246e-09	1.39535e-08	5.98361	Olig_1
DENND1B	1.50205	2.20207e-09	1.40723e-08	5.98215	Olig_1
MAP1LC3B	0.399775	2.28148e-09	1.45528e-08	5.97638	Olig_1
KLRC2	1.90857	2.31745e-09	1.47617e-08	5.97383	Olig_1
PDS5B	0.146225	2.45525e-09	1.56177e-08	5.96441	Olig_1
URI1	0.138149	2.67353e-09	1.69434e-08	5.95048	Olig_1
ITSN2	0.138801	3.41454e-09	2.15205e-08	5.91032	Olig_1
CCDC50	0.417695	3.66339e-09	2.30046e-08	5.89872	Olig_1
NF1	0.0845179	3.69379e-09	2.31849e-08	5.89735	Olig_1
RPL30	0.212683	3.73469e-09	2.34202e-08	5.89553	Olig_1
KCNIP3	1.21179	3.98802e-09	2.49747e-08	5.88469	Olig_1
PRRX1	2.40738	4.32816e-09	2.70432e-08	5.87114	Olig_1
ILDR2	0.647357	4.36494e-09	2.72606e-08	5.86973	Olig_1
BEST1	0.241923	4.6414e-09	2.89215e-08	5.85954	Olig_1
CSNK2A1	0.219308	4.75961e-09	2.96177e-08	5.85537	Olig_1
ALDH3A2	0.325176	4.87035e-09	3.02794e-08	5.85154	Olig_1
NOTCH1	0.438484	5.33619e-09	3.31008e-08	5.83633	Olig_1
PRDM2	0.159357	6.21306e-09	3.82638e-08	5.81092	Olig_1
RALGDS	0.188377	6.27168e-09	3.86075e-08	5.80935	Olig_1
RPL18	0.186121	7.73672e-09	4.72872e-08	5.7741	Olig_1
SMAD5	0.262391	7.88252e-09	4.8157e-08	5.77095	Olig_1
PELI1	0.307777	8.31762e-09	5.07474e-08	5.76189	Olig_1
SPECC1	0.133253	8.98815e-09	5.45962e-08	5.7488	Olig_1
PAK2	0.166022	1.00421e-08	6.07835e-08	5.73002	Olig_1
ATAD2B	0.174159	1.03408e-08	6.25634e-08	5.72504	Olig_1
THAP5	0.748572	1.05495e-08	6.37705e-08	5.72165	Olig_1
IPO5	0.323031	1.18903e-08	7.17175e-08	5.70129	Olig_1
CYB5R2	0.713722	1.23627e-08	7.44361e-08	5.69465	Olig_1
PPA2	0.161733	1.24772e-08	7.50926e-08	5.69307	Olig_1
RALGPS2	1.33062	1.30388e-08	7.83355e-08	5.68556	Olig_1
RPL7	0.384588	1.3214e-08	7.93186e-08	5.68327	Olig_1
SSR1	0.264578	1.47279e-08	8.806e-08	5.6647	Olig_1
RAB14	0.22412	1.52147e-08	9.08912e-08	5.65913	Olig_1
RIMS2	0.698354	1.53888e-08	9.18918e-08	5.65717	Olig_1
SCAF11	0.131908	1.5737e-08	9.39302e-08	5.65333	Olig_1
ATP10A	3.29484	1.66558e-08	9.91129e-08	5.64357	Olig_1
MARK1	0.334573	1.69207e-08	1.00646e-07	5.64086	Olig_1
RPL13	0.131284	1.7268e-08	1.02534e-07	5.63736	Olig_1
ENPP4	0.182148	1.77695e-08	1.05375e-07	5.63242	Olig_1
TBCA	0.149965	2.176e-08	1.28264e-07	5.59739	Olig_1
SGCB	0.297058	2.346e-08	1.38048e-07	5.58433	Olig_1
IVNS1ABP	0.236686	2.41339e-08	1.41892e-07	5.57941	Olig_1
TRAM1	0.29685	2.55367e-08	1.49883e-07	5.56957	Olig_1
PRICKLE2	0.41239	2.58759e-08	1.51616e-07	5.56727	Olig_1
PPP1R14A	0.101045	2.69632e-08	1.57784e-07	5.56009	Olig_1
XRCC5	0.131699	2.70144e-08	1.5795e-07	5.55976	Olig_1
CHURC1	0.328502	2.75388e-08	1.60879e-07	5.55641	Olig_1
MTFR1	0.238506	2.86435e-08	1.67048e-07	5.54953	Olig_1
SPPL3	0.107487	2.89612e-08	1.6883e-07	5.5476	Olig_1
CD63	0.256091	3.69724e-08	2.1435e-07	5.50473	Olig_1
BOK	0.226188	4.28356e-08	2.47298e-07	5.47874	Olig_1
MED13	0.120299	4.37166e-08	2.52173e-07	5.47514	Olig_1
ITGB4	0.710149	4.41625e-08	2.54425e-07	5.47334	Olig_1
LTBP3	0.376427	5.12737e-08	2.93915e-07	5.44684	Olig_1
POU2F1	0.127722	5.78125e-08	3.30158e-07	5.42544	Olig_1
IRF2BP2	0.244806	7.04546e-08	3.99204e-07	5.39001	Olig_1
ZNF549	0.545379	7.25016e-08	4.09958e-07	5.38486	Olig_1
IKZF5	0.338006	7.46615e-08	4.21651e-07	5.37958	Olig_1
TMOD2	0.201398	7.59294e-08	4.28283e-07	5.37654	Olig_1
FAXDC2	0.121156	8.01743e-08	4.51486e-07	5.36674	Olig_1
ZNF397	0.171246	9.05911e-08	5.08687e-07	5.34465	Olig_1
EIF4G2	0.261983	9.92985e-08	5.55538e-07	5.328	Olig_1
LRRK2	1.2943	1.01008e-07	5.64186e-07	5.3249	Olig_1
RPLP2	0.194099	1.24234e-07	6.90828e-07	5.28715	Olig_1
ASIC1	0.594256	1.2896e-07	7.16235e-07	5.28032	Olig_1
AASDHPPT	0.260085	1.31375e-07	7.29057e-07	5.27692	Olig_1
GHR	1.54809	1.35737e-07	7.52054e-07	5.27093	Olig_1
PRCP	0.681685	1.44954e-07	8.01824e-07	5.25886	Olig_1
STAM	0.240806	1.50533e-07	8.32016e-07	5.25191	Olig_1
TYMS	0.471985	1.6459e-07	9.06431e-07	5.23544	Olig_1
NACA	0.279316	1.66789e-07	9.18173e-07	5.23299	Olig_1
APOE	0.455454	1.72418e-07	9.484e-07	5.22686	Olig_1
CDK17	0.0844082	1.74082e-07	9.56791e-07	5.22508	Olig_1
SATB2	0.359006	1.81783e-07	9.97921e-07	5.21706	Olig_1
SPCS2	0.214518	1.89328e-07	1.03727e-06	5.20952	Olig_1
BZW2	0.552555	1.92566e-07	1.05459e-06	5.20637	Olig_1
AKAP12	1.00921	1.99751e-07	1.09306e-06	5.19957	Olig_1
RBM7	1.06547	2.04412e-07	1.11768e-06	5.19528	Olig_1
CDH2	0.227996	2.07602e-07	1.13422e-06	5.1924	Olig_1
RASA1	0.093387	2.20768e-07	1.20472e-06	5.18094	Olig_1
NDFIP2	0.210458	2.31162e-07	1.25994e-06	5.17235	Olig_1
YBX1	0.288977	2.33306e-07	1.27077e-06	5.17063	Olig_1
PREPL	0.142316	2.40706e-07	1.30988e-06	5.16479	Olig_1
AGAP1	0.104656	2.49348e-07	1.35583e-06	5.15819	Olig_1
MAPK6	0.178276	2.66764e-07	1.44596e-06	5.14553	Olig_1
GABARAP	0.257555	2.75011e-07	1.48831e-06	5.13981	Olig_1
FAM133B	0.169656	2.93761e-07	1.58666e-06	5.12741	Olig_1
CERS2	0.248916	2.98008e-07	1.60833e-06	5.1247	Olig_1
ZC3H12C	0.250165	3.48223e-07	1.86906e-06	5.09528	Olig_1
ASPH	0.247692	4.3462e-07	2.31293e-06	5.05313	Olig_1
RPL37A	0.134091	4.37652e-07	2.32636e-06	5.05181	Olig_1
ZDHHC13	0.45183	4.64199e-07	2.45891e-06	5.04055	Olig_1
GNAS	0.151337	4.81654e-07	2.54647e-06	5.03348	Olig_1
TM7SF3	0.337872	4.82974e-07	2.55247e-06	5.03296	Olig_1
MRFAP1	0.313696	4.87326e-07	2.57348e-06	5.03124	Olig_1
HDHD2	0.3217	5.34671e-07	2.8127e-06	5.01343	Olig_1
NUDT3	0.407174	5.49726e-07	2.88858e-06	5.00809	Olig_1
KATNAL1	0.232284	5.67303e-07	2.97525e-06	5.00203	Olig_1
NCOA6	0.104535	5.80923e-07	3.04552e-06	4.99745	Olig_1
STX16	0.160536	5.83405e-07	3.05737e-06	4.99663	Olig_1
DDX6	0.15497	5.89521e-07	3.08825e-06	4.99462	Olig_1
SMC2	0.502349	6.33221e-07	3.31212e-06	4.9808	Olig_1
TMTC1	1.07626	6.95198e-07	3.62389e-06	4.9627	Olig_1
PELI2	0.282484	7.15866e-07	3.72597e-06	4.95701	Olig_1
REEP1	1.19069	7.34265e-07	3.81452e-06	4.95207	Olig_1
APPBP2	0.106666	7.89222e-07	4.09692e-06	4.93801	Olig_1
RAP2A	0.340948	8.0882e-07	4.18916e-06	4.93323	Olig_1
OSBPL6	1.01483	8.27325e-07	4.28178e-06	4.92881	Olig_1
HELZ	0.184744	8.35347e-07	4.3168e-06	4.92692	Olig_1
RPL24	0.249179	8.58126e-07	4.42952e-06	4.92166	Olig_1
PDZRN4	0.804444	8.61463e-07	4.44507e-06	4.9209	Olig_1
RSRC1	0.123243	8.89006e-07	4.57688e-06	4.91474	Olig_1
SMAD1	0.449798	9.6137e-07	4.94018e-06	4.89939	Olig_1
ANTXR2	1.94424	1.02444e-06	5.25054e-06	4.88689	Olig_1
HMGN2	0.300796	1.02763e-06	5.26491e-06	4.88627	Olig_1
TPD52	0.121441	1.02844e-06	5.2671e-06	4.88612	Olig_1
CLPX	0.293042	1.11128e-06	5.67235e-06	4.87083	Olig_1
FCHO1	0.193384	1.11779e-06	5.70348e-06	4.86968	Olig_1
RHBDL3	0.693864	1.19886e-06	6.10126e-06	4.85583	Olig_1
STT3B	0.203173	1.20187e-06	6.11433e-06	4.85533	Olig_1
RAB7A	0.162182	1.258e-06	6.38804e-06	4.84628	Olig_1
DYNC1LI2	0.11343	1.27325e-06	6.46074e-06	4.84388	Olig_1
ADAMTS14	0.305039	1.29841e-06	6.57865e-06	4.84	Olig_1
HNRNPUL2	0.566713	1.33369e-06	6.75245e-06	4.83467	Olig_1
TAX1BP1	0.138272	1.34135e-06	6.78621e-06	4.83353	Olig_1
USP22	0.187752	1.36174e-06	6.88181e-06	4.83052	Olig_1
UQCRB	0.32477	1.38058e-06	6.97188e-06	4.82779	Olig_1
YBX3	1.56007	1.47512e-06	7.43565e-06	4.81458	Olig_1
GALNT1	0.212998	1.53789e-06	7.73787e-06	4.80625	Olig_1
NCOR2	0.136178	1.57328e-06	7.90723e-06	4.8017	Olig_1
ARPP19	0.222279	1.57489e-06	7.91246e-06	4.80149	Olig_1
MYO5B	0.908194	1.6404e-06	8.23253e-06	4.79332	Olig_1
BCL2L11	0.771504	1.79352e-06	8.97477e-06	4.7754	Olig_1
NEDD4	0.513561	1.81151e-06	9.05819e-06	4.77339	Olig_1
HNRNPLL	0.354918	1.88989e-06	9.43982e-06	4.76486	Olig_1
HSD17B12	0.185352	1.91585e-06	9.56258e-06	4.7621	Olig_1
PCBP1	0.275371	2.07457e-06	1.03248e-05	4.74602	Olig_1
DAZAP2	0.237651	2.11964e-06	1.053e-05	4.74167	Olig_1
RPS21	0.314766	2.14815e-06	1.0664e-05	4.73896	Olig_1
QDPR	0.0892074	2.27421e-06	1.12572e-05	4.72739	Olig_1
RNPC3	0.137121	2.36549e-06	1.16838e-05	4.71939	Olig_1
MIB1	0.155009	2.37538e-06	1.17285e-05	4.71854	Olig_1
RPL36	0.244062	2.85978e-06	1.40095e-05	4.68064	Olig_1
SFPQ	0.0820888	2.89293e-06	1.41668e-05	4.67828	Olig_1
PDZD2	0.194074	3.10989e-06	1.51752e-05	4.66342	Olig_1
THSD7A	0.823923	3.13466e-06	1.52845e-05	4.66179	Olig_1
RPL38	0.186794	3.13563e-06	1.52845e-05	4.66173	Olig_1
ABLIM2	0.528662	3.35559e-06	1.62989e-05	4.64776	Olig_1
SFT2D2	0.283889	3.46357e-06	1.6776e-05	4.64122	Olig_1
SH3RF3	1.43753	3.60459e-06	1.74283e-05	4.63297	Olig_1
BMP1	0.596648	3.72964e-06	1.80266e-05	4.62591	Olig_1
BRD9	0.235921	3.91311e-06	1.88736e-05	4.61594	Olig_1
RPL29	0.246953	4.06159e-06	1.95425e-05	4.60821	Olig_1
RPL37	0.209977	4.07239e-06	1.95868e-05	4.60765	Olig_1
DNAJA1	0.263147	4.25049e-06	2.04148e-05	4.59874	Olig_1
ARHGAP20	1.41479	4.28849e-06	2.05757e-05	4.59689	Olig_1
PRKD3	0.421973	4.30733e-06	2.06589e-05	4.59597	Olig_1
NUP98	0.215289	4.34765e-06	2.08451e-05	4.59403	Olig_1
ZEB2	0.0609894	4.873e-06	2.32665e-05	4.57018	Olig_1
LHFPL2	0.614378	4.8928e-06	2.33529e-05	4.56933	Olig_1
BZW1	0.350441	4.9141e-06	2.34383e-05	4.56842	Olig_1
CCDC47	0.319384	4.92297e-06	2.34725e-05	4.56804	Olig_1
RPS6	0.157989	4.97067e-06	2.36835e-05	4.56602	Olig_1
ATXN7L3B	0.3343	5.13641e-06	2.44393e-05	4.55914	Olig_1
ATP1B1	0.0746054	5.23651e-06	2.48811e-05	4.55508	Olig_1
PPP6R3	0.0786836	5.6878e-06	2.69416e-05	4.53767	Olig_1
RMND5A	0.23166	5.94832e-06	2.81411e-05	4.52822	Olig_1
TULP3	0.23236	5.99352e-06	2.83409e-05	4.52662	Olig_1
RAP1A	0.088882	6.03509e-06	2.85178e-05	4.52516	Olig_1
MAP3K1	0.578931	6.22085e-06	2.93553e-05	4.51874	Olig_1
ZC3H7A	0.282501	6.30073e-06	2.97118e-05	4.51604	Olig_1
ABAT	0.373001	6.41912e-06	3.02597e-05	4.51209	Olig_1
PEBP1	0.0803723	7.63619e-06	3.57517e-05	4.47514	Olig_1
TSHZ1	0.448997	8.46133e-06	3.94537e-05	4.45317	Olig_1
OGFRL1	0.700454	8.71534e-06	4.059e-05	4.44681	Olig_1
WDR17	0.350717	9.0751e-06	4.21725e-05	4.43811	Olig_1
PPIB	0.26538	9.38204e-06	4.35694e-05	4.43095	Olig_1
ATL2	0.401891	9.57124e-06	4.4418e-05	4.42664	Olig_1
HDAC2	0.248941	9.7591e-06	4.52288e-05	4.42244	Olig_1
PFDN2	0.276499	9.94053e-06	4.60231e-05	4.41846	Olig_1
SMG7	0.210534	1.01597e-05	4.69589e-05	4.41375	Olig_1
TMED4	0.280563	1.01635e-05	4.69607e-05	4.41366	Olig_1
PHF3	0.0868675	1.02966e-05	4.75116e-05	4.41085	Olig_1
TGFBR2	0.918546	1.0855e-05	5.00545e-05	4.3994	Olig_1
PPM1A	0.195694	1.09224e-05	5.03317e-05	4.39806	Olig_1
TLR1	1.16765	1.11152e-05	5.11859e-05	4.39426	Olig_1
ADAMTS1	0.37972	1.16233e-05	5.34369e-05	4.38454	Olig_1
YWHAB	0.158391	1.17539e-05	5.39821e-05	4.3821	Olig_1
ACADSB	0.242134	1.28476e-05	5.88087e-05	4.36269	Olig_1
GDPD1	0.291079	1.3332e-05	6.09248e-05	4.35458	Olig_1
OSTF1	0.211285	1.44308e-05	6.57276e-05	4.3372	Olig_1
HNRNPC	0.0904483	1.60143e-05	7.26029e-05	4.31425	Olig_1
GAS7	0.0846963	1.63061e-05	7.39017e-05	4.31026	Olig_1
SLC8A3	0.653415	1.66253e-05	7.53235e-05	4.30597	Olig_1
TREH	0.518603	1.6916e-05	7.65648e-05	4.30214	Olig_1
NKAIN2	0.101888	1.74994e-05	7.91532e-05	4.29462	Olig_1
RPL8	0.197486	1.77543e-05	8.02536e-05	4.29141	Olig_1
PLSCR4	1.86952	1.86007e-05	8.39411e-05	4.28106	Olig_1
KIF13A	0.0524725	1.88093e-05	8.48547e-05	4.27858	Olig_1
GTPBP1	0.360829	1.91691e-05	8.6393e-05	4.27436	Olig_1
MYH10	0.457305	1.91959e-05	8.64855e-05	4.27404	Olig_1
KIFAP3	0.194843	1.93299e-05	8.70604e-05	4.27249	Olig_1
BCAS1	0.0429236	1.98493e-05	8.93119e-05	4.26658	Olig_1
NOVA2	0.491573	2.09102e-05	9.3901e-05	4.25494	Olig_1
SEC62	0.11385	2.14658e-05	9.63017e-05	4.24907	Olig_1
CA2	0.137321	2.19741e-05	9.85181e-05	4.24383	Olig_1
TNR	0.965482	2.32029e-05	0.000103722	4.23161	Olig_1
ZFP36L2	0.389964	2.3472e-05	0.000104721	4.22901	Olig_1
FAM181B	0.533173	2.35238e-05	0.000104918	4.22852	Olig_1
HR	0.505342	2.43782e-05	0.000108553	4.22048	Olig_1
CTSD	0.235704	2.50893e-05	0.000111611	4.21399	Olig_1
DOK6	0.911902	2.61196e-05	0.000115931	4.2049	Olig_1
ZNF493	0.195029	2.61358e-05	0.000115966	4.20476	Olig_1
HS3ST5	0.070764	2.62707e-05	0.000116527	4.2036	Olig_1
KIAA1614	0.909962	2.70146e-05	0.000119634	4.19727	Olig_1
LMNA	0.260832	2.70347e-05	0.000119684	4.19711	Olig_1
RPL35A	0.219358	2.77522e-05	0.000122702	4.19117	Olig_1
TCEA1	0.265242	2.78995e-05	0.000123314	4.18997	Olig_1
SF3B1	0.103574	2.80122e-05	0.000123773	4.18905	Olig_1
IFNAR2	0.348372	2.9243e-05	0.000129086	4.17928	Olig_1
IK	0.435605	2.9827e-05	0.000131453	4.17478	Olig_1
CUL5	0.127454	3.09589e-05	0.00013618	4.1663	Olig_1
SLC22A23	0.0736027	3.25658e-05	0.000142928	4.15474	Olig_1
ARF1	0.215089	3.4641e-05	0.000151697	4.14059	Olig_1
RPS7	0.2318	3.63973e-05	0.000158982	4.12923	Olig_1
HEATR5A	0.192084	3.70588e-05	0.00016182	4.12509	Olig_1
PHF21A	0.0861171	3.81203e-05	0.000166191	4.11859	Olig_1
TUBB4A	0.102018	4.15805e-05	0.000180532	4.09852	Olig_1
CD55	0.160039	4.31401e-05	0.000186832	4.08998	Olig_1
FAM107B	0.057213	4.36313e-05	0.00018884	4.08736	Olig_1
PIK3R3	1.32019	4.93584e-05	0.00021279	4.05864	Olig_1
APBB2	0.0566331	5.14797e-05	0.000221483	4.04881	Olig_1
MIDN	0.33729	5.26075e-05	0.000225982	4.04373	Olig_1
BACH1	0.254601	5.3419e-05	0.000229039	4.04014	Olig_1
RAC1	0.16229	5.4298e-05	0.000232517	4.03631	Olig_1
RPL31	0.223647	5.49575e-05	0.000235122	4.03348	Olig_1
TOMM20	0.185961	5.52359e-05	0.000236239	4.03229	Olig_1
ARHGAP42	1.54111	5.52916e-05	0.00023633	4.03205	Olig_1
GFOD1	0.309294	5.55489e-05	0.000237356	4.03096	Olig_1
FAM13A	0.493099	5.62403e-05	0.000240012	4.02805	Olig_1
ANKRD65	0.435644	5.82759e-05	0.000248545	4.01969	Olig_1
HIPK3	0.182657	6.07828e-05	0.000258595	4.00975	Olig_1
AFAP1L2	2.51302	6.12372e-05	0.000260448	4.00799	Olig_1
HS6ST3	0.822608	6.76839e-05	0.000286448	3.98428	Olig_1
EIF4A2	0.167345	7.01561e-05	0.000296454	3.97576	Olig_1
RPS14	0.129027	7.55634e-05	0.000317838	3.95805	Olig_1
ACAP2	0.134416	8.46203e-05	0.000354091	3.93092	Olig_1
ANAPC10	0.238481	8.71316e-05	0.000364267	3.92389	Olig_1
TET2	0.14089	8.7719e-05	0.0003665	3.92227	Olig_1
B4GALT6	1.00904	9.20831e-05	0.000383801	3.91056	Olig_1
RAP1GAP	0.37129	9.38655e-05	0.000390283	3.90593	Olig_1
GPR62	0.383247	9.54724e-05	0.000396604	3.90182	Olig_1
WAC	0.0695366	9.70834e-05	0.000403175	3.89777	Olig_1
WBP2	0.172966	9.88495e-05	0.000410338	3.8934	Olig_1
CUL3	0.112094	0.00010284	0.000426051	3.88379	Olig_1
FYCO1	0.25685	0.000103358	0.000427809	3.88257	Olig_1
SIM2	1.22336	0.000111365	0.000459157	3.86439	Olig_1
KCNAB1	0.227687	0.000111481	0.000459356	3.86414	Olig_1
IGSF9B	1.71088	0.000113727	0.000468193	3.85927	Olig_1
LEMD3	0.254157	0.000115002	0.000473158	3.85654	Olig_1
DCTN1	0.249518	0.000117699	0.000483673	3.85087	Olig_1
RPS15A	0.267468	0.000123316	0.000505698	3.83944	Olig_1
OTUD4	0.192703	0.000131063	0.000534916	3.82445	Olig_1
RFTN2	0.0473556	0.000131337	0.000535874	3.82394	Olig_1
RPS24	0.179959	0.000131856	0.000537464	3.82297	Olig_1
RPS16	0.149467	0.000131883	0.000537464	3.82292	Olig_1
EGLN1	0.250237	0.000141767	0.000575354	3.80507	Olig_1
CACYBP	0.343199	0.000143847	0.000583108	3.80146	Olig_1
MAP2K5	0.10974	0.000145264	0.000588333	3.79903	Olig_1
CHL1	0.711865	0.000145895	0.000590413	3.79795	Olig_1
ZHX3	0.0895026	0.000145917	0.000590413	3.79792	Olig_1
SEMA5B	2.89899	0.00014865	0.000600808	3.79331	Olig_1
TGIF1	1.22276	0.000149026	0.000602148	3.79269	Olig_1
USP7	0.232494	0.000154775	0.000624277	3.78328	Olig_1
CABYR	0.43305	0.000156789	0.000631658	3.78006	Olig_1
HERC5	0.750669	0.000159431	0.000642116	3.7759	Olig_1
REST	0.316016	0.000169301	0.000679081	3.7609	Olig_1
FIP1L1	0.240997	0.000170252	0.000682696	3.7595	Olig_1
SPOPL	0.244776	0.000171292	0.000686668	3.75798	Olig_1
BSG	0.272709	0.000171954	0.000689119	3.75701	Olig_1
TMEM26	1.23346	0.000181235	0.000725046	3.74383	Olig_1
PPP2R2B	0.0815136	0.000185629	0.000741759	3.73781	Olig_1
EXOC4	0.0586171	0.000186817	0.000745858	3.73621	Olig_1
PHIP	0.0565704	0.000190421	0.000758925	3.7314	Olig_1
ABI2	0.133704	0.000193503	0.000769645	3.72735	Olig_1
BRINP3	1.07686	0.000194837	0.000774726	3.72562	Olig_1
ZNF207	0.082462	0.000198926	0.000789844	3.72038	Olig_1
CRIPT	0.311957	0.000199799	0.000792853	3.71927	Olig_1
SMARCE1	0.313037	0.000206082	0.000817077	3.71144	Olig_1
METTL21A	0.337512	0.000216088	0.000855065	3.69943	Olig_1
ANKRD17	0.0605837	0.000222364	0.000878086	3.69215	Olig_1
SARNP	0.283884	0.000229624	0.000905714	3.68398	Olig_1
GPR17	2.33061	0.000230967	0.000910227	3.68249	Olig_1
SGCE	0.104438	0.000240209	0.000946106	3.67248	Olig_1
USP15	0.121461	0.000241667	0.000951579	3.67093	Olig_1
BMP8B	0.906111	0.000243987	0.000959338	3.66849	Olig_1
RPL35	0.16257	0.000245025	0.000962867	3.6674	Olig_1
MYRF	0.0569687	0.000252625	0.000991599	3.65958	Olig_1
GABARAPL2	0.161465	0.00025943	0.00101744	3.65277	Olig_1
DDX17	0.0635565	0.000267195	0.0010464	3.64519	Olig_1
EXOSC10	0.246426	0.000278475	0.0010884	3.63454	Olig_1
NBN	0.225927	0.000280577	0.00109631	3.6326	Olig_1
SLC6A12	0.707021	0.000291993	0.00113962	3.6223	Olig_1
CIC	0.394734	0.000296728	0.00115711	3.61814	Olig_1
SLC4A7	0.325406	0.000300418	0.00117051	3.61494	Olig_1
ST13	0.164327	0.00031063	0.00120893	3.60627	Olig_1
SMC3	0.200755	0.000315825	0.0012274	3.60196	Olig_1
FLRT1	0.729037	0.000326056	0.00126431	3.59367	Olig_1
GRIK3	0.840829	0.00033247	0.00128845	3.58859	Olig_1
ZBTB7C	1.49655	0.000333581	0.00129239	3.58772	Olig_1
ISG20	0.538316	0.000345077	0.00133618	3.57887	Olig_1
FNBP1	0.0213425	0.000346894	0.00134283	3.5775	Olig_1
DGKI	0.170335	0.000350383	0.00135558	3.57488	Olig_1
DR1	0.412074	0.000354392	0.0013707	3.57191	Olig_1
ARL6IP5	0.113063	0.000363542	0.00140372	3.56523	Olig_1
NCALD	0.384703	0.000365033	0.00140869	3.56415	Olig_1
ZNF154	1.35612	0.00036906	0.00142223	3.56127	Olig_1
TP53INP1	0.434613	0.000374481	0.00144151	3.55744	Olig_1
RPS3	0.15829	0.00038724	0.00148812	3.54863	Olig_1
PLAT	1.84379	0.000438551	0.00167492	3.51573	Olig_1
RAB5C	0.480117	0.000466818	0.00177753	3.49911	Olig_1
DERA	0.326707	0.000469421	0.00178645	3.49762	Olig_1
MMP17	1.17033	0.000471031	0.00179208	3.49671	Olig_1
ZFP91	0.331692	0.000471266	0.00179248	3.49658	Olig_1
SYNE2	0.678145	0.000472552	0.00179688	3.49585	Olig_1
SUMO2	0.256967	0.000496993	0.00188324	3.48237	Olig_1
C18orf32	0.222512	0.000521785	0.001971	3.46932	Olig_1
CPNE3	0.260811	0.000553869	0.00208333	3.45325	Olig_1
RTKN	0.145238	0.000604056	0.00226373	3.42979	Olig_1
FAR2	0.4231	0.000618112	0.00231325	3.42354	Olig_1
ZNF326	0.142334	0.000627877	0.00234852	3.41928	Olig_1
ITSN1	0.164908	0.00063143	0.00236052	3.41774	Olig_1
MON1B	0.403577	0.000648151	0.00241712	3.41062	Olig_1
EP300	0.107029	0.000657485	0.0024486	3.40672	Olig_1
KLHL28	0.15573	0.000673379	0.00250576	3.40019	Olig_1
TERF1	0.178686	0.000687854	0.00255754	3.39438	Olig_1
FRMPD1	0.87293	0.000694361	0.00258034	3.3918	Olig_1
UBXN7	0.170278	0.000696354	0.00258705	3.39101	Olig_1
NBPF10	2.055	0.000704556	0.00261611	3.3878	Olig_1
CRBN	0.134655	0.000708975	0.00263109	3.38608	Olig_1
SMCHD1	0.0738252	0.000758322	0.00280288	3.36758	Olig_1
RPLP0	0.201232	0.000761706	0.00281311	3.36635	Olig_1
PA2G4	0.299843	0.000777653	0.00286892	3.36063	Olig_1
STOX2	0.0860128	0.000783555	0.00288993	3.35854	Olig_1
GOPC	0.176896	0.000785226	0.00289505	3.35795	Olig_1
MLF2	0.334854	0.000814927	0.00299518	3.34767	Olig_1
PEG10	0.410111	0.000823012	0.00302247	3.34494	Olig_1
DNAJC7	0.151821	0.000842025	0.00308818	3.3386	Olig_1
ARID4B	0.055826	0.000850313	0.00311691	3.33588	Olig_1
JMY	0.201052	0.00090787	0.00331904	3.31762	Olig_1
TMEM125	0.189678	0.000910789	0.00332882	3.31673	Olig_1
INPPL1	0.657906	0.000921753	0.00336621	3.31338	Olig_1
CYP4V2	0.29147	0.000945416	0.00344805	3.30629	Olig_1
APC	0.0750009	0.00094925	0.00345836	3.30515	Olig_1
CHCHD3	0.110456	0.000959698	0.00349087	3.30208	Olig_1
CSDE1	0.108603	0.000968009	0.00351831	3.29966	Olig_1
CYP7B1	0.125281	0.000983265	0.00357093	3.29527	Olig_1
DYRK1A	0.0825036	0.000985631	0.00357858	3.2946	Olig_1
PDZD8	0.171448	0.0010554	0.00382079	3.27533	Olig_1
MIA3	0.215476	0.00110092	0.00397617	3.26338	Olig_1
AFAP1	0.542699	0.001105	0.00398775	3.26233	Olig_1
GNB2	0.42999	0.001132	0.00407661	3.25548	Olig_1
HSBP1	0.204944	0.00115608	0.00415788	3.2495	Olig_1
N4BP2	0.715049	0.00117547	0.00422322	3.24477	Olig_1
RPN1	0.268646	0.00119874	0.00429894	3.23918	Olig_1
FAM89A	1.45458	0.00127729	0.0045616	3.22103	Olig_1
ANO6	0.739498	0.00128518	0.00458623	3.21927	Olig_1
RSL24D1	0.409802	0.00128655	0.0045899	3.21896	Olig_1
APOLD1	0.249349	0.00129417	0.0046159	3.21727	Olig_1
PKP2	1.86809	0.00135832	0.00482592	3.20336	Olig_1
ZNF618	0.455035	0.00137945	0.00489087	3.19892	Olig_1
KBTBD3	0.207749	0.00139552	0.00494659	3.19557	Olig_1
CEBPD	0.879326	0.00139883	0.00495702	3.19489	Olig_1
MSL1	0.23301	0.00140493	0.00497735	3.19364	Olig_1
KANK2	1.43299	0.00141971	0.00502714	3.19061	Olig_1
NRCAM	0.353123	0.00145591	0.00514473	3.18333	Olig_1
KPNA4	0.159361	0.00147671	0.00520883	3.17922	Olig_1
RBL2	0.109123	0.00151125	0.0053225	3.17251	Olig_1
PCBP2	0.111137	0.00152314	0.00536161	3.17024	Olig_1
BCL6	0.174332	0.0015484	0.00544077	3.16546	Olig_1
NKX6-2	0.0743994	0.00157354	0.00551672	3.16077	Olig_1
SERBP1	0.18477	0.00157363	0.00551672	3.16075	Olig_1
IREB2	0.16869	0.00158937	0.00556766	3.15785	Olig_1
RHBDF1	2.02597	0.0016248	0.0056874	3.15142	Olig_1
SPSB1	0.198425	0.00163159	0.00570537	3.1502	Olig_1
DPY19L4	0.190885	0.00170355	0.00593886	3.13757	Olig_1
SCAF8	0.0831102	0.00171674	0.00598031	3.13531	Olig_1
HMGXB4	0.166052	0.00181509	0.00630376	3.11893	Olig_1
TMX4	0.226159	0.00182664	0.00634226	3.11706	Olig_1
TWF1	0.303783	0.00183446	0.00636383	3.1158	Olig_1
DOCK6	1.01245	0.00185542	0.00643082	3.11245	Olig_1
FMN2	0.362792	0.00189212	0.00654317	3.10666	Olig_1
TLN1	0.286697	0.00190598	0.00658282	3.1045	Olig_1
EIF4G3	0.0521775	0.00194687	0.00671896	3.09822	Olig_1
JUN	0.270292	0.00196383	0.00677241	3.09565	Olig_1
CHPT1	0.351909	0.00197914	0.00682177	3.09335	Olig_1
ENO1	0.190516	0.00200706	0.00691454	3.08919	Olig_1
IRS1	1.56359	0.00207803	0.00714474	3.07885	Olig_1
MBD5	0.0481963	0.00209154	0.00718938	3.07692	Olig_1
FOXJ3	0.080704	0.00211963	0.00728229	3.07294	Olig_1
RHOQ	0.158226	0.00212462	0.0072976	3.07224	Olig_1
NUDT4	0.78073	0.00224725	0.00770341	3.05545	Olig_1
FAT1	0.365365	0.00225002	0.00771098	3.05508	Olig_1
GRB14	1.85404	0.002321	0.00794235	3.04575	Olig_1
RPS12	0.138461	0.00235001	0.00803761	3.04201	Olig_1
PCMTD1	0.0965594	0.002355	0.00805069	3.04138	Olig_1
RPS11	0.121416	0.00235835	0.00806013	3.04095	Olig_1
MSANTD4	0.196528	0.00242256	0.00826317	3.03285	Olig_1
SUGT1	0.132696	0.0024606	0.00838251	3.02814	Olig_1
CDKN2C	1.01012	0.00246552	0.0083972	3.02754	Olig_1
C5orf24	0.203666	0.00247099	0.00841165	3.02687	Olig_1
PLEKHA3	0.271331	0.00248059	0.00844222	3.0257	Olig_1
CTDSP2	0.207034	0.00248735	0.00846104	3.02488	Olig_1
RBMS3	0.447186	0.00252364	0.00858025	3.02049	Olig_1
NAA16	0.158335	0.00259262	0.00880607	3.01232	Olig_1
EMC2	0.0862589	0.00261178	0.00886677	3.01008	Olig_1
SRP72	0.200255	0.00262349	0.00890433	3.00872	Olig_1
COX6A1	0.157296	0.00266948	0.00905147	3.00344	Olig_1
RALY	0.141304	0.00277722	0.00938209	2.99138	Olig_1
HIF1A	0.241902	0.00289434	0.00975614	2.97874	Olig_1
AMPH	0.651573	0.00291237	0.00981211	2.97684	Olig_1
MBTD1	0.112537	0.00296332	0.00996668	2.97152	Olig_1
PAIP2	0.130239	0.00304291	0.0102145	2.96337	Olig_1
RHEB	0.240115	0.00304656	0.0102241	2.963	Olig_1
YAF2	0.193263	0.00305482	0.0102493	2.96217	Olig_1
PPM1D	0.193277	0.00308249	0.0103397	2.95939	Olig_1
RFC1	0.0782412	0.00309054	0.0103641	2.95859	Olig_1
SYNCRIP	0.223865	0.00312619	0.010476	2.95505	Olig_1
SNX13	0.119989	0.00313049	0.0104853	2.95463	Olig_1
MAMDC2	0.692969	0.0031346	0.0104965	2.95422	Olig_1
GMNN	0.885328	0.00321573	0.0107525	2.94633	Olig_1
RPL15	0.0993515	0.00322345	0.0107757	2.94558	Olig_1
ZHX1	0.325635	0.00323389	0.0108053	2.94458	Olig_1
CTDNEP1	0.430886	0.00325082	0.0108513	2.94297	Olig_1
PRDX1	0.0795701	0.00329133	0.0109759	2.93913	Olig_1
SAP30L	0.461816	0.00333651	0.0111185	2.9349	Olig_1
MCM8	0.535614	0.00344916	0.011466	2.92459	Olig_1
HFE	0.65988	0.00356463	0.011827	2.91432	Olig_1
CNTN2	0.0324518	0.00360157	0.0119352	2.9111	Olig_1
TST	0.46129	0.00360829	0.0119546	2.91052	Olig_1
APH1A	0.394844	0.00380399	0.0125485	2.89397	Olig_1
TRIM23	0.166675	0.00385054	0.0126929	2.89015	Olig_1
ARHGAP10	1.29527	0.00389651	0.0128291	2.88642	Olig_1
UBE2B	0.112387	0.00395669	0.0130023	2.88159	Olig_1
DENND4C	0.148567	0.00396145	0.0130148	2.88122	Olig_1
LURAP1L	0.296844	0.00399042	0.0131006	2.87892	Olig_1
CHD4	0.136192	0.00411996	0.0134969	2.86883	Olig_1
UGCG	0.347662	0.00417405	0.0136578	2.8647	Olig_1
TAB2	0.137214	0.00418976	0.013706	2.86351	Olig_1
RPS20	0.155453	0.00420645	0.0137442	2.86225	Olig_1
ATG7	0.0819897	0.00427869	0.013967	2.85685	Olig_1
ERI3	0.112391	0.00431238	0.0140669	2.85436	Olig_1
KIF6	0.045099	0.00443796	0.0144526	2.84523	Olig_1
TBC1D2	0.15822	0.00446437	0.0145214	2.84334	Olig_1
XRCC4	0.20434	0.00453277	0.0147299	2.83849	Olig_1
SHISA4	0.248015	0.00476386	0.0154334	2.82258	Olig_1
ZSCAN30	0.144475	0.00481027	0.0155691	2.81947	Olig_1
UBA52	0.133614	0.00484266	0.0156592	2.81732	Olig_1
RPL27	0.167799	0.00487042	0.0157378	2.81548	Olig_1
CFL1	0.0857773	0.00498777	0.0161095	2.80782	Olig_1
BLOC1S6	0.283102	0.00500971	0.0161765	2.80641	Olig_1
GTF2A1	0.210618	0.00503272	0.016228	2.80493	Olig_1
CHSY3	0.369061	0.00505939	0.0163025	2.80323	Olig_1
FKBP4	0.31053	0.00514959	0.0165698	2.79752	Olig_1
PPP2CB	0.15286	0.00524759	0.0168696	2.79143	Olig_1
PHACTR4	0.0610405	0.00535362	0.0171941	2.78495	Olig_1
RBM12B	0.194995	0.00536494	0.0172264	2.78426	Olig_1
CAP1	0.208619	0.00557019	0.0178438	2.77207	Olig_1
CDON	0.560374	0.00561717	0.0179776	2.76933	Olig_1
USP1	0.294956	0.00562591	0.017993	2.76882	Olig_1
YY1	0.125926	0.00563456	0.0180142	2.76832	Olig_1
ARPC4	0.412917	0.00564949	0.0180558	2.76746	Olig_1
DNAJB4	0.475332	0.00569922	0.0181978	2.7646	Olig_1
MRPL42	0.211197	0.00581333	0.0185121	2.75813	Olig_1
PABPC1	0.138683	0.00623607	0.019797	2.7351	Olig_1
NBR1	0.14721	0.0062765	0.0199116	2.73298	Olig_1
UBB	0.0470534	0.00629217	0.0199521	2.73215	Olig_1
NOP56	0.221742	0.00634256	0.0201026	2.72953	Olig_1
ZNF804A	1.0366	0.00650923	0.0205881	2.72096	Olig_1
CACNA1E	0.317113	0.00661125	0.0208963	2.71582	Olig_1
LIN7C	0.354124	0.0068064	0.0214737	2.70617	Olig_1
AKNA	0.457583	0.00682181	0.0215173	2.70542	Olig_1
TAGLN2	0.60907	0.00684448	0.0215789	2.70432	Olig_1
RABGAP1L	0.0314234	0.00689249	0.0217104	2.70199	Olig_1
UQCRC2	0.144284	0.00692804	0.0218074	2.70028	Olig_1
PIK3CA	0.155845	0.00694142	0.0218445	2.69964	Olig_1
SEL1L	0.109012	0.00695451	0.0218707	2.69901	Olig_1
G2E3	0.179184	0.0070287	0.0220888	2.69548	Olig_1
ATOH8	0.862401	0.00705452	0.0221649	2.69426	Olig_1
TECR	0.132354	0.00730788	0.0229086	2.68248	Olig_1
C11orf58	0.104463	0.00733631	0.0229925	2.68118	Olig_1
FBXW11	0.107238	0.00745492	0.0233057	2.67581	Olig_1
MPHOSPH8	0.0673019	0.00749822	0.0234358	2.67387	Olig_1
TMEM50A	0.170031	0.00764682	0.023846	2.66728	Olig_1
TRUB1	0.346246	0.00770928	0.0240299	2.66454	Olig_1
RPA1	0.258354	0.00776648	0.0241917	2.66206	Olig_1
COX16	0.37112	0.00782553	0.0243646	2.65951	Olig_1
SH3BP5	0.137495	0.00784974	0.0244179	2.65847	Olig_1
GSTO1	0.164799	0.00793442	0.0246478	2.65485	Olig_1
PRKCQ	0.114625	0.00793971	0.0246587	2.65462	Olig_1
CDYL2	1.2071	0.00804029	0.0249372	2.65037	Olig_1
ANGPTL2	0.292804	0.00807256	0.025026	2.64902	Olig_1
ITGA4	2.62921	0.00815239	0.0252621	2.64569	Olig_1
TPM1	0.431365	0.00834566	0.0257854	2.63776	Olig_1
RPS13	0.129919	0.00840731	0.0259584	2.63526	Olig_1
EFR3A	0.169806	0.00843613	0.0260357	2.6341	Olig_1
ERCC6L2	0.0660182	0.00846051	0.0261051	2.63312	Olig_1
LIMS1	0.164288	0.00847372	0.0261341	2.63259	Olig_1
WDPCP	0.0371266	0.00879592	0.0270489	2.61989	Olig_1
TRHDE	0.555339	0.00885352	0.02722	2.61766	Olig_1
RBBP8	0.710019	0.00911088	0.0279362	2.60787	Olig_1
SEMA6D	0.0589484	0.00955979	0.0292276	2.59136	Olig_1
MAT2B	0.321879	0.00988246	0.0301341	2.57992	Olig_1
XPO7	0.129017	0.0102353	0.031127	2.56778	Olig_1
ZNF350	0.408437	0.0104353	0.0316862	2.56106	Olig_1
STIP1	0.248804	0.0105515	0.0320177	2.55721	Olig_1
LRRN1	0.534646	0.0106139	0.0321858	2.55516	Olig_1
QPRT	1.1716	0.0108054	0.0327018	2.54893	Olig_1
TRIM28	0.334627	0.010948	0.0331188	2.54435	Olig_1
SKI	0.255303	0.0111922	0.0337978	2.53664	Olig_1
CDH18	0.465756	0.0114272	0.0344546	2.52936	Olig_1
HSPB1	0.526919	0.011486	0.0346243	2.52755	Olig_1
CERS6	0.479782	0.0115815	0.0348824	2.52465	Olig_1
BTBD8	0.0813318	0.0117091	0.0352273	2.52079	Olig_1
NR3C2	0.149498	0.011889	0.0357181	2.51542	Olig_1
ZNF585B	0.302919	0.0120663	0.036191	2.5102	Olig_1
KDM5A	0.0810932	0.0120929	0.036263	2.50942	Olig_1
RASSF3	0.878497	0.0125522	0.0374767	2.49623	Olig_1
REPIN1	0.569916	0.0127186	0.0379405	2.49155	Olig_1
TTC39C	1.05549	0.0128702	0.0383513	2.48734	Olig_1
RPL4	0.187848	0.0129735	0.0386253	2.4845	Olig_1
NALCN	0.0334508	0.0130748	0.0389101	2.48173	Olig_1
NCOA1	0.0341956	0.0132082	0.0392731	2.47811	Olig_1
SLC11A2	0.074068	0.0132992	0.0395182	2.47566	Olig_1
CNTN4	0.605634	0.0132992	0.0395182	2.47565	Olig_1
ZFAND5	0.130176	0.0136708	0.0405083	2.4658	Olig_1
TPR	0.103547	0.0139058	0.0411426	2.45969	Olig_1
SAR1B	0.121992	0.0143853	0.0424883	2.4475	Olig_1
MPP7	1.12474	0.0144296	0.0426101	2.44639	Olig_1
SAV1	0.197167	0.0145631	0.0429579	2.44307	Olig_1
SSNA1	0.196439	0.0146269	0.0431277	2.44149	Olig_1
NUB1	0.183809	0.0147245	0.0433967	2.43909	Olig_1
KDM6B	0.816322	0.0147824	0.0435394	2.43767	Olig_1
KLHL3	0.103073	0.0149385	0.0439429	2.43387	Olig_1
ZNF292	0.0290945	0.0150161	0.0441429	2.43199	Olig_1
TMEM135	0.0610477	0.0150535	0.0442336	2.43109	Olig_1
CBX4	0.291173	0.0150731	0.0442724	2.43062	Olig_1
RBM33	0.0505718	0.0150907	0.0443146	2.43019	Olig_1
TMEM260	0.0875806	0.0151628	0.0444977	2.42847	Olig_1
HAUS6	0.278172	0.0152165	0.0446363	2.42719	Olig_1
FAM110B	0.774674	0.0152768	0.0448038	2.42575	Olig_1
TRIT1	0.196064	0.015512	0.0454645	2.4202	Olig_1
GALC	0.167739	0.0158083	0.0462835	2.41331	Olig_1
MAZ	0.465832	0.0159384	0.0466049	2.41032	Olig_1
APPL2	0.0754867	0.0162309	0.0474097	2.40368	Olig_1
SNX7	0.492541	0.0162696	0.0475126	2.40281	Olig_1
FAM8A1	0.269947	0.0162976	0.0475842	2.40218	Olig_1
ITM2C	0.320137	0.0164244	0.0479239	2.39935	Olig_1
RPS5	0.113579	0.0165211	0.0481857	2.3972	Olig_1
CEP128	0.164712	0.0165294	0.0481997	2.39701	Olig_1
ZMAT3	0.300113	0.0165701	0.0483049	2.39611	Olig_1
RNASEK	0.195804	0.0166154	0.048397	2.39511	Olig_1
DIRAS3	2.62042	0.0170416	0.0495041	2.38581	Olig_1
RABAC1	0.132979	0.0171042	0.049665	2.38446	Olig_1
UTP20	0.149655	0.01713	0.049719	2.38391	Olig_1
IFI16	0.149298	0.0171623	0.0498022	2.38321	Olig_1
PNISR	0.0281757	0.0174428	0.0505309	2.37724	Olig_1
ZDHHC17	0.0830128	0.0176552	0.0511247	2.37277	Olig_1
MANEA	0.312441	0.0180064	0.0520539	2.36549	Olig_1
LPL	1.03084	0.0182197	0.052593	2.36112	Olig_1
NANOS1	1.66633	0.0187181	0.0539298	2.3511	Olig_1
KBTBD6	0.369317	0.0188671	0.0543478	2.34815	Olig_1
CSMD1	0.217368	0.0188996	0.0544185	2.34751	Olig_1
GSTO2	0.215733	0.0189425	0.0545102	2.34666	Olig_1
DNAJC24	0.229385	0.0189955	0.0546487	2.34562	Olig_1
SLC41A1	0.335925	0.0192167	0.055164	2.3413	Olig_1
ATP6V0E2	0.167722	0.0192741	0.0553	2.34019	Olig_1
SUPT16H	0.186504	0.0193125	0.0553986	2.33944	Olig_1
VIM	0.541252	0.0193399	0.0554656	2.33891	Olig_1
RDH11	0.184237	0.0193894	0.0555843	2.33796	Olig_1
SNRPB2	0.247494	0.0195471	0.0559547	2.33493	Olig_1
PTPN14	1.38233	0.0196567	0.0562334	2.33284	Olig_1
CENPQ	0.351662	0.0197284	0.0564149	2.33147	Olig_1
MYO5A	0.0326166	0.0198291	0.0566793	2.32957	Olig_1
SSR3	0.199273	0.0198675	0.0567773	2.32884	Olig_1
CDC14A	0.67449	0.0200338	0.0572049	2.32571	Olig_1
TMEM33	0.168057	0.0200997	0.0573575	2.32448	Olig_1
EZH2	0.496305	0.0202461	0.0577393	2.32175	Olig_1
TAPT1	0.1122	0.020308	0.0578896	2.32061	Olig_1
EI24	0.266901	0.0204665	0.0582831	2.31768	Olig_1
ARL8B	0.104072	0.0205758	0.0585822	2.31568	Olig_1
JARID2	0.0851451	0.0206133	0.0586526	2.31499	Olig_1
DPY19L3	0.234086	0.0206346	0.058701	2.3146	Olig_1
SOX21	2.06587	0.0206461	0.0587096	2.31439	Olig_1
MPZ	1.01857	0.020745	0.0589241	2.31259	Olig_1
WASF1	0.144175	0.0208889	0.0593016	2.30999	Olig_1
APOC1	0.842445	0.0210292	0.0596754	2.30746	Olig_1
RPL5	0.105567	0.0220398	0.0622349	2.28968	Olig_1
MYO6	0.019302	0.0222492	0.0627744	2.28609	Olig_1
SPECC1L	0.164188	0.0222841	0.0628601	2.28549	Olig_1
UNC80	0.532794	0.022564	0.0635845	2.28074	Olig_1
FNBP1L	0.713251	0.0228547	0.0643376	2.27586	Olig_1
IRF2BPL	0.559499	0.0228968	0.0644297	2.27515	Olig_1
PARD6G	0.58763	0.022959	0.0645915	2.27412	Olig_1
ZNF649	0.30342	0.0230147	0.064715	2.27319	Olig_1
ADAMTS8	0.36295	0.0231968	0.0651405	2.27018	Olig_1
UBXN1	0.220443	0.0232121	0.0651702	2.26993	Olig_1
BOD1L1	0.04746	0.0232249	0.0651928	2.26971	Olig_1
UBR5	0.0427284	0.0233499	0.0654635	2.26766	Olig_1
ACVR2B	0.254777	0.0236005	0.0660717	2.26357	Olig_1
RFC3	0.339899	0.0237961	0.0665787	2.26041	Olig_1
BTBD17	1.3339	0.023897	0.0668473	2.25878	Olig_1
REPS1	0.125044	0.0239158	0.0668728	2.25848	Olig_1
AHSA1	0.237147	0.0243693	0.06803	2.25126	Olig_1
GKAP1	0.169622	0.0246537	0.0687822	2.24679	Olig_1
FAM13B	0.0307904	0.024958	0.0695747	2.24205	Olig_1
SLC25A3	0.168439	0.0253122	0.0704622	2.2366	Olig_1
FUS	0.0625149	0.0267924	0.0743116	2.21453	Olig_1
CROT	0.308174	0.0272954	0.0755427	2.20727	Olig_1
GOT1	0.213595	0.0274837	0.0760142	2.20458	Olig_1
SNX27	0.120473	0.027537	0.0761357	2.20382	Olig_1
SSRP1	0.343218	0.0279867	0.0772655	2.19747	Olig_1
KHSRP	0.210933	0.0282387	0.0779143	2.19395	Olig_1
ING3	0.278839	0.0282496	0.0779287	2.1938	Olig_1
PIKFYVE	0.084555	0.0283584	0.0781347	2.19229	Olig_1
C2CD5	0.0888976	0.0288303	0.0792872	2.1858	Olig_1
PRKAR1A	0.107512	0.0292444	0.0803183	2.18018	Olig_1
EIF3F	0.187006	0.0294481	0.0808132	2.17744	Olig_1
UBE2R2	0.0421203	0.0306608	0.0839066	2.16145	Olig_1
ITPR1	0.340777	0.0307299	0.0840789	2.16055	Olig_1
APBB1	0.0610498	0.0309684	0.0845969	2.15748	Olig_1
PON2	0.0795783	0.0311102	0.0849311	2.15566	Olig_1
UGT8	0.0421856	0.0315643	0.0860638	2.14988	Olig_1
TMEM45A	0.545159	0.0319085	0.0868886	2.14556	Olig_1
TEX14	0.492028	0.0320709	0.0872963	2.14353	Olig_1
AMBRA1	0.0581908	0.0323615	0.0880351	2.13992	Olig_1
ATP2C1	0.0651146	0.0328951	0.0892393	2.13336	Olig_1
CLN5	0.285628	0.0330063	0.089488	2.13201	Olig_1
RPL23	0.122697	0.0332362	0.0900404	2.12922	Olig_1
TMED2	0.209912	0.0334014	0.0904699	2.12723	Olig_1
PPM1K	0.109903	0.0335339	0.0907753	2.12563	Olig_1
NDUFAF3	0.206131	0.0336113	0.0909311	2.1247	Olig_1
PHC1	0.305449	0.0339546	0.0917475	2.12061	Olig_1
MED17	0.290933	0.0347635	0.0938081	2.1111	Olig_1
RC3H1	0.0672976	0.0349941	0.094412	2.10843	Olig_1
CELF1	0.105568	0.035084	0.0945802	2.10739	Olig_1
ATG9A	0.376211	0.0357255	0.09614	2.10004	Olig_1
ZNF615	0.325278	0.036279	0.0975529	2.09379	Olig_1
LYRM7	0.178912	0.0370189	0.0993483	2.08556	Olig_1
RNF145	0.182412	0.0375243	0.100526	2.08001	Olig_1
FGF14	0.31987	0.037731	0.101023	2.07777	Olig_1
BCAS3	0.0228665	0.0377556	0.101069	2.0775	Olig_1
TACC1	0.0231988	0.0378497	0.101281	2.07648	Olig_1
CUL1	0.0895506	0.0378688	0.101313	2.07627	Olig_1
STK32B	1.08874	0.0382024	0.102106	2.07268	Olig_1
ARID3A	0.695867	0.038579	0.103012	2.06865	Olig_1
PLBD2	0.206429	0.0391108	0.104311	2.06302	Olig_1
OMA1	0.362299	0.0397317	0.105802	2.05653	Olig_1
VWA5A	0.509248	0.0401324	0.106787	2.05238	Olig_1
RSRC2	0.0993864	0.0402744	0.107123	2.05092	Olig_1
PRPF19	0.27699	0.0407832	0.108392	2.04573	Olig_1
SC5D	0.159622	0.041502	0.110167	2.03848	Olig_1
TBC1D4	0.777924	0.042107	0.111523	2.03246	Olig_1
APLF	0.175406	0.0423953	0.112198	2.02962	Olig_1
MTG1	0.19166	0.0424029	0.112198	2.02954	Olig_1
CLIP1	0.167069	0.0425501	0.112544	2.0281	Olig_1
ZNF134	0.473227	0.0426778	0.112817	2.02685	Olig_1
TMEM117	0.0892336	0.0429044	0.113329	2.02464	Olig_1
MYH15	0.349567	0.0431931	0.113968	2.02184	Olig_1
RAB3GAP2	0.105123	0.0432549	0.114057	2.02124	Olig_1
CNNM3	0.246603	0.0437735	0.115336	2.01625	Olig_1
SPINT2	0.123612	0.044695	0.117517	2.00751	Olig_1
CCDC61	0.528686	0.0449287	0.118086	2.00532	Olig_1
ZNF93	0.542972	0.0449694	0.118148	2.00494	Olig_1
ZC3HAV1	0.565764	0.0449876	0.118173	2.00477	Olig_1
RAB21	0.111195	0.0454258	0.119187	2.00069	Olig_1
FAM177A1	0.0690428	0.0467002	0.122065	1.98901	Olig_1
LIX1	0.949232	0.046904	0.122551	1.98717	Olig_1
PCTP	0.670946	0.0469329	0.122604	1.98691	Olig_1
RNF144B	1.35528	0.0473176	0.123444	1.98345	Olig_1
RPL6	0.124596	0.0474299	0.123667	1.98244	Olig_1
BPTF	0.025386	0.0476808	0.12418	1.9802	Olig_1
NAV1	0.0367174	0.0481994	0.125364	1.97561	Olig_1
DAPL1	1.59163	0.0485668	0.126129	1.97238	Olig_1
CNPY2	0.158515	0.0485798	0.126139	1.97226	Olig_1
KLF15	0.252672	0.0486669	0.126341	1.9715	Olig_1
AQP11	0.290192	0.0487163	0.126445	1.97107	Olig_1
COL14A1	0.441064	0.0489265	0.126919	1.96923	Olig_1
DDX18	0.126291	0.0491718	0.127483	1.9671	Olig_1
ZFP36	0.456869	0.0496794	0.128654	1.96271	Olig_1
ATP6V0B	0.114647	0.0496928	0.128664	1.9626	Olig_1
OSBPL9	0.0320803	0.0500934	0.129628	1.95917	Olig_1
RBM8A	0.220597	0.0501483	0.129746	1.9587	Olig_1
HMGA1	0.540571	0.0506055	0.130781	1.95481	Olig_1
MKRN1	0.228404	0.0507494	0.131128	1.95359	Olig_1
RAB5B	0.179267	0.0513281	0.132424	1.94873	Olig_1
B4GALT5	0.159534	0.0515191	0.132842	1.94713	Olig_1
PANX1	0.695907	0.0516789	0.133179	1.9458	Olig_1
HSPH1	0.218249	0.0521677	0.134363	1.94175	Olig_1
NCSTN	0.220823	0.0539628	0.138649	1.92714	Olig_1
RB1	0.0794089	0.0540503	0.138848	1.92643	Olig_1
LMAN1	0.137253	0.0543311	0.139491	1.92419	Olig_1
ZNF318	0.148825	0.0543531	0.139521	1.92401	Olig_1
USP34	0.0295213	0.054686	0.14035	1.92136	Olig_1
TMEM167A	0.168743	0.0548058	0.140605	1.92041	Olig_1
POLR2M	0.308108	0.0550688	0.141227	1.91833	Olig_1
PHF20L1	0.0624559	0.0555744	0.142444	1.91436	Olig_1
SGCD	0.0560046	0.0557443	0.142746	1.91303	Olig_1
KDM4C	0.0207746	0.0566452	0.144676	1.90604	Olig_1
ZBTB47	0.263104	0.0572828	0.146114	1.90115	Olig_1
SRCAP	0.351558	0.0576807	0.147075	1.89812	Olig_1
GABARAPL1	0.169654	0.0577352	0.147175	1.8977	Olig_1
BRD7	0.126684	0.0580017	0.147736	1.89568	Olig_1
TBC1D15	0.0777992	0.0581786	0.148069	1.89435	Olig_1
ZBTB40	0.230397	0.0582453	0.148212	1.89385	Olig_1
GAS1	0.692425	0.0586236	0.148981	1.89101	Olig_1
GLI3	0.697699	0.0589425	0.149764	1.88862	Olig_1
NREP	0.727127	0.0608414	0.154036	1.87465	Olig_1
C5orf63	1.88444	0.0608525	0.154036	1.87457	Olig_1
FZD8	2.13069	0.0610176	0.15438	1.87337	Olig_1
SPATA9	0.779402	0.0620911	0.156808	1.86564	Olig_1
GSK3A	0.355136	0.0622169	0.157096	1.86475	Olig_1
RHOA	0.0842006	0.0624568	0.157644	1.86304	Olig_1
TRIM8	0.222287	0.0639053	0.160917	1.85284	Olig_1
SP3	0.115493	0.0641754	0.161442	1.85096	Olig_1
ERLEC1	0.141097	0.0641974	0.161442	1.85081	Olig_1
CD74	0.358882	0.0649699	0.16297	1.84547	Olig_1
DTHD1	0.565287	0.0656466	0.164427	1.84083	Olig_1
LAMA3	1.20348	0.0661925	0.165554	1.83712	Olig_1
DDAH1	0.501807	0.0665519	0.166301	1.83469	Olig_1
ANP32B	0.174698	0.0665741	0.166326	1.83454	Olig_1
CREG1	0.226344	0.0667362	0.16664	1.83345	Olig_1
PTGFRN	1.6748	0.0667501	0.166645	1.83335	Olig_1
CARHSP1	0.145943	0.0667978	0.166734	1.83303	Olig_1
CCNG2	0.297283	0.068025	0.169581	1.82484	Olig_1
RPTOR	0.0650574	0.068456	0.17047	1.82199	Olig_1
SCAF1	0.279625	0.0689412	0.171492	1.8188	Olig_1
SMU1	0.174608	0.0691513	0.171984	1.81743	Olig_1
TMEM127	0.344502	0.0700104	0.173837	1.81184	Olig_1
CEP44	0.121662	0.0707911	0.175522	1.80682	Olig_1
ZNF358	0.244997	0.071016	0.176016	1.80538	Olig_1
UBR3	0.0230598	0.0718412	0.177933	1.80012	Olig_1
PDE8B	0.249524	0.0718568	0.17794	1.80002	Olig_1
HNRNPA0	0.168618	0.0724558	0.179197	1.79624	Olig_1
RMDN1	0.116822	0.0727574	0.179846	1.79435	Olig_1
TMED9	0.289443	0.0730749	0.180501	1.79236	Olig_1
CEP120	0.197774	0.0736432	0.181513	1.78882	Olig_1
C16orf87	0.358797	0.0737484	0.18174	1.78817	Olig_1
GIGYF2	0.0308227	0.074179	0.182539	1.78551	Olig_1
MFSD6	0.0435905	0.0769799	0.188621	1.76848	Olig_1
CYFIP2	0.151269	0.0772579	0.189235	1.76682	Olig_1
STK17A	0.388467	0.0780621	0.190909	1.76204	Olig_1
ZNF274	0.182648	0.0790223	0.193075	1.75639	Olig_1
LIN9	0.511129	0.0791381	0.193289	1.75571	Olig_1
SOX9	0.321299	0.0798352	0.194923	1.75164	Olig_1
ADCY2	0.337892	0.0801787	0.195622	1.74965	Olig_1
STON1	1.11064	0.0807497	0.196771	1.74635	Olig_1
C9orf78	0.200701	0.080771	0.196788	1.74623	Olig_1
TOR1AIP1	0.18182	0.0814576	0.19818	1.74229	Olig_1
NUDC	0.148262	0.0823257	0.200061	1.73735	Olig_1
EDC4	0.451795	0.0823471	0.200061	1.73723	Olig_1
LAMA2	-0.0139329	0.0825387	0.200491	1.73614	Olig_1
MTMR6	0.122353	0.0833212	0.202081	1.73173	Olig_1
FBXO34	0.213546	0.0834461	0.202315	1.73103	Olig_1
LEPROT	0.288132	0.0836766	0.202825	1.72974	Olig_1
PTPRZ1	0.324846	0.0841084	0.203656	1.72733	Olig_1
BRD4	0.100629	0.0842872	0.204053	1.72633	Olig_1
HEPN1	0.0821643	0.0843283	0.204116	1.72611	Olig_1
TPCN2	0.524906	0.0846404	0.204764	1.72437	Olig_1
NTN4	0.843411	0.0847125	0.204866	1.72397	Olig_1
TAF4B	0.322854	0.0850012	0.205528	1.72238	Olig_1
MKLN1	0.033881	0.0851579	0.205835	1.72151	Olig_1
PIGT	0.134812	0.0869392	0.209918	1.71177	Olig_1
CALR	0.119475	0.0873194	0.210799	1.70971	Olig_1
CCDC117	0.285245	0.0886652	0.213636	1.70248	Olig_1
AMOTL1	0.903821	0.0886838	0.213643	1.70238	Olig_1
SMARCA5	0.0512942	0.0888392	0.213868	1.70155	Olig_1
ASH1L	0.0157526	0.0893939	0.214977	1.6986	Olig_1
TPP2	0.0713503	0.0899218	0.21602	1.69581	Olig_1
STK24	0.277347	0.0902209	0.2167	1.69423	Olig_1
APMAP	0.189745	0.0902459	0.216722	1.6941	Olig_1
YIPF3	0.258955	0.0905051	0.217269	1.69274	Olig_1
PRKCSH	0.114637	0.0915455	0.219575	1.6873	Olig_1
CAPRIN1	0.115135	0.0918334	0.220112	1.6858	Olig_1
MBD6	0.267499	0.0918722	0.220167	1.6856	Olig_1
CTBP2	0.0750622	0.0923627	0.221188	1.68306	Olig_1
ANKRD13A	0.109288	0.0923627	0.221188	1.68306	Olig_1
ZNF664	0.35034	0.0926281	0.221708	1.68169	Olig_1
ANO2	0.341315	0.0933944	0.223386	1.67776	Olig_1
EIF4EBP2	0.296106	0.0937293	0.22407	1.67605	Olig_1
TP53BP2	0.14348	0.0949364	0.226719	1.66991	Olig_1
CDV3	0.205749	0.0949622	0.226741	1.66978	Olig_1
CDC25B	0.239849	0.0955004	0.227868	1.66707	Olig_1
SLMAP	0.0753703	0.0959657	0.228899	1.66473	Olig_1
RNF2	0.296597	0.0961925	0.229241	1.6636	Olig_1
GM2A	0.29118	0.0966174	0.230134	1.66148	Olig_1
FOS	0.228575	0.0972434	0.231424	1.65837	Olig_1
MPC2	0.257591	0.0984598	0.234076	1.65237	Olig_1
ABCC4	0.512756	0.0994263	0.236129	1.64764	Olig_1
BMPR1B	0.677842	0.101015	0.239364	1.63995	Olig_1
GINS4	0.561257	0.101461	0.240214	1.63781	Olig_1
PRPF6	0.132578	0.101804	0.240819	1.63617	Olig_1
TRERF1	0.574153	0.102552	0.242297	1.6326	Olig_1
ALKBH5	0.130778	0.102757	0.242573	1.63163	Olig_1
CST3	0.157041	0.102775	0.242573	1.63155	Olig_1
CLASP1	0.0156146	0.102838	0.242638	1.63125	Olig_1
ZNF773	0.753264	0.103397	0.243778	1.6286	Olig_1
MTA3	0.099147	0.103693	0.244278	1.62721	Olig_1
ZNF671	0.55732	0.104286	0.245549	1.62442	Olig_1
PHLDA3	0.135657	0.104624	0.24626	1.62284	Olig_1
PKN2	0.033594	0.105216	0.247443	1.62007	Olig_1
NCOA4	0.175434	0.106138	0.249313	1.6158	Olig_1
UBXN4	0.038884	0.106212	0.249443	1.61546	Olig_1
HSPA5	0.122602	0.10724	0.251549	1.61072	Olig_1
ANXA2	0.706861	0.108025	0.253181	1.60714	Olig_1
SENP7	0.037674	0.108126	0.253375	1.60668	Olig_1
XPR1	0.150394	0.109347	0.255748	1.60114	Olig_1
PFN2	0.266541	0.109783	0.256508	1.59917	Olig_1
SSR2	0.219164	0.110001	0.256893	1.59819	Olig_1
SDF4	0.151206	0.111161	0.25931	1.593	Olig_1
STK38L	0.274696	0.111349	0.259688	1.59216	Olig_1
FXR2	0.21007	0.111846	0.260716	1.58995	Olig_1
B3GNT7	1.52489	0.112001	0.261032	1.58926	Olig_1
NUMB	0.0852201	0.113265	0.263522	1.58369	Olig_1
TMEM67	0.634658	0.113675	0.26435	1.58189	Olig_1
EPC2	0.067346	0.114985	0.266945	1.57618	Olig_1
DNAJC8	0.178221	0.115268	0.267557	1.57495	Olig_1
EFCAB11	0.167895	0.115446	0.267925	1.57418	Olig_1
PLA2G4A	1.32924	0.115657	0.268279	1.57327	Olig_1
PAIP1	0.183009	0.116105	0.269228	1.57133	Olig_1
FRYL	0.0483365	0.116476	0.269906	1.56974	Olig_1
MBD3	0.28884	0.116767	0.270535	1.56849	Olig_1
ARL5A	0.195763	0.118878	0.274777	1.5595	Olig_1
GDF11	0.437589	0.118936	0.274864	1.55926	Olig_1
DGKH	0.275779	0.120022	0.277142	1.55468	Olig_1
ARSG	0.441711	0.120314	0.277769	1.55346	Olig_1
PER1	0.208396	0.121704	0.280618	1.54766	Olig_1
PAPOLG	0.159554	0.122043	0.281288	1.54625	Olig_1
ACTR2	0.097373	0.122569	0.282271	1.54408	Olig_1
PNPLA2	0.280311	0.123676	0.284528	1.53953	Olig_1
DCT	1.52176	0.123943	0.285045	1.53843	Olig_1
SNRNP27	0.231847	0.124055	0.285208	1.53797	Olig_1
MYOT	0.187192	0.124654	0.286305	1.53553	Olig_1
FAM135A	0.0480035	0.124942	0.286863	1.53436	Olig_1
TMED8	0.208581	0.125118	0.28722	1.53364	Olig_1
BICC1	0.423506	0.125536	0.288035	1.53194	Olig_1
PNPLA8	0.117963	0.125746	0.288423	1.53109	Olig_1
STARD9	0.054128	0.127081	0.291151	1.52571	Olig_1
ARF3	0.281053	0.127435	0.291711	1.52429	Olig_1
ONECUT1	1.26555	0.127606	0.291955	1.52361	Olig_1
ERMN	0.00857627	0.127737	0.292207	1.52309	Olig_1
PSME4	0.0232137	0.127896	0.292377	1.52245	Olig_1
FER	0.0393845	0.128472	0.293497	1.52016	Olig_1
FERMT1	1.3942	0.128773	0.294087	1.51896	Olig_1
FKBP8	0.118401	0.128865	0.294249	1.51859	Olig_1
PHB2	0.251173	0.12891	0.294302	1.51842	Olig_1
HIBCH	0.0186766	0.129112	0.294716	1.51761	Olig_1
IFNA2	0.968745	0.129299	0.294994	1.51687	Olig_1
RHBDD2	0.22405	0.129394	0.295163	1.51649	Olig_1
CTDSP1	0.203117	0.129894	0.296156	1.51452	Olig_1
KCMF1	0.136928	0.130506	0.297058	1.51211	Olig_1
GSG1L	0.940184	0.130845	0.297731	1.51078	Olig_1
TSHZ3	0.829146	0.130944	0.297808	1.51039	Olig_1
TBKBP1	1.03417	0.131424	0.298753	1.50851	Olig_1
AZIN1	0.130868	0.131549	0.298987	1.50802	Olig_1
RBM22	0.176153	0.131868	0.299612	1.50678	Olig_1
ZNF343	0.442175	0.132332	0.300567	1.50497	Olig_1
NDUFV2	0.143572	0.132872	0.301546	1.50287	Olig_1
ZNF211	0.337804	0.133081	0.30192	1.50206	Olig_1
GPR108	0.370532	0.133264	0.302235	1.50135	Olig_1
GAMT	0.113408	0.134025	0.303611	1.49842	Olig_1
SMURF2	0.130078	0.134204	0.303967	1.49773	Olig_1
CENPB	0.49594	0.134657	0.304892	1.49599	Olig_1
GLIPR1L2	0.258357	0.13473	0.305006	1.49571	Olig_1
HOXB2	0.756035	0.134998	0.305512	1.49468	Olig_1
PSMC3	0.23866	0.136345	0.308003	1.48954	Olig_1
XAB2	0.338232	0.136748	0.30871	1.48801	Olig_1
ACSS3	0.535729	0.138437	0.312267	1.48164	Olig_1
RPL14	0.0984769	0.140352	0.316071	1.47448	Olig_1
PTPRM	0.133369	0.140903	0.317062	1.47244	Olig_1
TRA2B	0.0790199	0.140909	0.317062	1.47242	Olig_1
ZNF22	0.279152	0.141242	0.317655	1.47118	Olig_1
AEBP2	0.0775121	0.141719	0.318417	1.46942	Olig_1
VWF	0.354158	0.141996	0.318987	1.4684	Olig_1
ZNF395	0.403884	0.145232	0.325458	1.45658	Olig_1
PUM1	0.0459994	0.14577	0.326451	1.45464	Olig_1
SP4	0.115436	0.146066	0.327004	1.45357	Olig_1
HEXA	0.189707	0.146112	0.327004	1.4534	Olig_1
COX10	0.248245	0.146511	0.327682	1.45196	Olig_1
RBM42	0.270886	0.147406	0.329524	1.44876	Olig_1
KRAS	0.21408	0.147525	0.329629	1.44833	Olig_1
SRSF9	0.177074	0.147626	0.329801	1.44797	Olig_1
DENND5B	0.0676978	0.149344	0.333097	1.44185	Olig_1
LZTFL1	0.229558	0.15136	0.337102	1.43474	Olig_1
DDX5	0.0225147	0.153375	0.341145	1.42771	Olig_1
PTPRO	0.607996	0.15433	0.342994	1.4244	Olig_1
CDR2L	0.206526	0.154947	0.344087	1.42227	Olig_1
HSPA4L	0.306116	0.155175	0.344315	1.42149	Olig_1
CENPK	0.850805	0.15527	0.34447	1.42116	Olig_1
CDKN2B	1.25739	0.155935	0.345487	1.41888	Olig_1
PPTC7	0.2038	0.156118	0.345739	1.41825	Olig_1
SLU7	0.220026	0.156254	0.345984	1.41778	Olig_1
ADA	0.237068	0.156459	0.346382	1.41708	Olig_1
MPPED2	0.361193	0.156605	0.346648	1.41658	Olig_1
RRM1	0.218619	0.157711	0.348872	1.41281	Olig_1
HNRNPUL1	0.135617	0.157837	0.349096	1.41238	Olig_1
ARCN1	0.156451	0.157989	0.349319	1.41187	Olig_1
MED4	0.13176	0.158113	0.34948	1.41145	Olig_1
ZNF528	0.17053	0.158998	0.351212	1.40845	Olig_1
FAM171B	0.102624	0.160091	0.353341	1.40477	Olig_1
CNBP	0.0951011	0.160157	0.353431	1.40454	Olig_1
EIF5B	0.100032	0.16122	0.355316	1.40098	Olig_1
DEPDC7	0.34401	0.161781	0.356214	1.39911	Olig_1
RPL12	0.134754	0.164878	0.362063	1.38885	Olig_1
ACTR6	0.192913	0.165029	0.362321	1.38835	Olig_1
HECTD1	0.031965	0.165313	0.362886	1.38742	Olig_1
PSG8	0.262356	0.166179	0.364309	1.38459	Olig_1
RALBP1	0.157623	0.16628	0.364427	1.38426	Olig_1
TNKS2	0.0785795	0.166602	0.364901	1.3832	Olig_1
UBE3A	0.0398035	0.167424	0.366419	1.38053	Olig_1
ZBTB10	0.256741	0.168596	0.36868	1.37673	Olig_1
CTSC	0.961755	0.169022	0.369375	1.37535	Olig_1
ZNF770	0.18956	0.170964	0.37285	1.36911	Olig_1
FAM217B	0.143239	0.171196	0.373178	1.36837	Olig_1
CEP250	0.271351	0.172486	0.375764	1.36426	Olig_1
NDUFS7	0.0440823	0.17255	0.375773	1.36405	Olig_1
SF3B2	0.094589	0.173586	0.377728	1.36077	Olig_1
STRAP	0.173704	0.174209	0.378844	1.3588	Olig_1
CDH7	1.25879	0.176486	0.382888	1.35165	Olig_1
SAMHD1	0.204694	0.176585	0.382981	1.35135	Olig_1
SYVN1	0.220297	0.177351	0.38434	1.34896	Olig_1
OPA1	0.0671059	0.180324	0.389676	1.33976	Olig_1
SLC35B2	0.234828	0.181254	0.391379	1.3369	Olig_1
TLE3	0.923349	0.181587	0.391851	1.33589	Olig_1
RPRD2	0.0530325	0.181821	0.392294	1.33517	Olig_1
SNX16	0.271745	0.183815	0.395945	1.3291	Olig_1
PURA	0.080719	0.184226	0.396676	1.32785	Olig_1
EMG1	0.322808	0.184573	0.397359	1.32681	Olig_1
SNX3	0.123756	0.185648	0.399237	1.32356	Olig_1
FEN1	0.848502	0.185722	0.399333	1.32334	Olig_1
SLC39A10	0.132989	0.187021	0.401623	1.31944	Olig_1
UBE4A	0.0727617	0.188107	0.403576	1.3162	Olig_1
E2F3	0.572218	0.189715	0.406393	1.31142	Olig_1
RARA	0.999898	0.190759	0.408503	1.30834	Olig_1
TNFRSF10B	1.30316	0.190804	0.408535	1.3082	Olig_1
GLRX5	0.249549	0.191355	0.409205	1.30658	Olig_1
SHISA2	0.650209	0.192209	0.410647	1.30407	Olig_1
CRTAP	0.198285	0.192416	0.410897	1.30347	Olig_1
FAM193B	0.116885	0.19397	0.413482	1.29892	Olig_1
SHC2	0.16798	0.19409	0.413494	1.29857	Olig_1
TMEM41B	0.079758	0.19414	0.413494	1.29843	Olig_1
CCDC15	0.335222	0.194143	0.413494	1.29842	Olig_1
GRSF1	0.148096	0.194907	0.414864	1.2962	Olig_1
ADRA1A	1.15878	0.195081	0.41517	1.29569	Olig_1
CMYA5	0.570676	0.197101	0.418595	1.28986	Olig_1
MOB4	0.170407	0.197161	0.418595	1.28968	Olig_1
MCM9	0.127903	0.200595	0.425259	1.27986	Olig_1
ZNF407	0.067445	0.200835	0.425637	1.27918	Olig_1
PTPRB	0.385281	0.201039	0.426003	1.2786	Olig_1
SLC30A4	0.124178	0.201154	0.426182	1.27827	Olig_1
PIK3C3	0.0406765	0.203818	0.431094	1.27075	Olig_1
TMEM109	0.404674	0.204979	0.433083	1.26749	Olig_1
SCN9A	0.482888	0.205991	0.434698	1.26467	Olig_1
LMAN2	0.181216	0.207449	0.437197	1.26061	Olig_1
BMP2	0.733336	0.20776	0.437748	1.25975	Olig_1
ZNF582	0.272941	0.208364	0.438752	1.25808	Olig_1
SPTB	0.299555	0.209198	0.439902	1.25577	Olig_1
HMGB2	0.306264	0.209387	0.440097	1.25525	Olig_1
PPP1R15B	0.173776	0.210798	0.44225	1.25138	Olig_1
BRAF	0.0179018	0.210926	0.442384	1.25102	Olig_1
AP3B1	0.00855515	0.212192	0.444446	1.24756	Olig_1
PLEC	0.435896	0.212375	0.444745	1.24706	Olig_1
TUSC1	0.43275	0.213769	0.446988	1.24327	Olig_1
CLDN14	0.860814	0.213771	0.446988	1.24326	Olig_1
ZIK1	1.09064	0.213835	0.447053	1.24309	Olig_1
MACROD1	0.235044	0.215154	0.449332	1.23952	Olig_1
ZNF775	0.271254	0.21665	0.451839	1.23548	Olig_1
FCGR2A	0.999901	0.217581	0.453437	1.23299	Olig_1
LAMTOR1	0.116499	0.218218	0.454558	1.23128	Olig_1
SNAPC1	0.249073	0.219456	0.456734	1.22797	Olig_1
NTHL1	0.295034	0.219533	0.456813	1.22777	Olig_1
CHRAC1	0.207395	0.220748	0.459132	1.22454	Olig_1
PRKACB	0.00425109	0.222032	0.461383	1.22114	Olig_1
TGS1	0.157572	0.222116	0.461418	1.22092	Olig_1
CRTC2	0.205257	0.222528	0.462186	1.21983	Olig_1
RRM2B	0.182262	0.223834	0.464285	1.2164	Olig_1
PSMB4	0.130873	0.22388	0.464311	1.21628	Olig_1
AAMP	0.179423	0.224685	0.465839	1.21417	Olig_1
KAT7	0.152116	0.225316	0.466938	1.21251	Olig_1
HSPBP1	0.292807	0.225742	0.467749	1.2114	Olig_1
PI4KB	0.12111	0.226701	0.469445	1.2089	Olig_1
GPNMB	0.93623	0.227399	0.470499	1.20709	Olig_1
MIPOL1	0.189079	0.227618	0.470856	1.20652	Olig_1
LRP10	0.234402	0.228301	0.471915	1.20475	Olig_1
COL20A1	1.57545	0.229151	0.473456	1.20255	Olig_1
BTAF1	0.0505405	0.229636	0.474173	1.2013	Olig_1
DNAJC25	0.38424	0.229996	0.474491	1.20037	Olig_1
ZNF606	0.172407	0.230188	0.474618	1.19987	Olig_1
NGDN	0.164978	0.23124	0.476199	1.19717	Olig_1
TRIM45	0.560783	0.232349	0.478052	1.19433	Olig_1
DPM2	0.23933	0.233009	0.479196	1.19264	Olig_1
COPB1	0.111274	0.233744	0.480491	1.19077	Olig_1
AIP	0.176327	0.236414	0.484964	1.184	Olig_1
MCC	0.320551	0.236531	0.485061	1.1837	Olig_1
CD302	0.44626	0.236828	0.485524	1.18295	Olig_1
SLC38A9	0.0542829	0.237861	0.487278	1.18035	Olig_1
FBXO11	0.0242214	0.240692	0.492563	1.17326	Olig_1
FAM162B	2.20449	0.24082	0.492752	1.17294	Olig_1
TOP2B	0.0405058	0.24197	0.494468	1.17008	Olig_1
EFTUD2	0.164857	0.243203	0.496594	1.16702	Olig_1
PDE12	0.213666	0.244287	0.498428	1.16434	Olig_1
TRAM1L1	0.260029	0.244325	0.498428	1.16424	Olig_1
LYSMD4	0.182694	0.244441	0.498428	1.16396	Olig_1
KIF20B	0.273013	0.248246	0.504883	1.15462	Olig_1
PROX1	0.0510624	0.248837	0.505768	1.15318	Olig_1
PHAX	0.179606	0.248887	0.505796	1.15306	Olig_1
USF2	0.153081	0.251174	0.509689	1.1475	Olig_1
BTF3	0.0768899	0.251411	0.510096	1.14693	Olig_1
DTWD2	0.161971	0.251707	0.510469	1.14621	Olig_1
C12orf57	0.152571	0.254013	0.513924	1.14066	Olig_1
MED21	0.186583	0.254178	0.51404	1.14026	Olig_1
ZNF410	0.202961	0.254692	0.514626	1.13903	Olig_1
ALG10B	0.281337	0.255996	0.516728	1.13591	Olig_1
ST8SIA1	0.369062	0.256106	0.516875	1.13564	Olig_1
MRFAP1L1	0.237848	0.257719	0.519672	1.1318	Olig_1
CHST9	0.756167	0.258193	0.520475	1.13067	Olig_1
CD47	0.0188202	0.259312	0.522352	1.12802	Olig_1
FBXO45	0.234936	0.261115	0.525519	1.12376	Olig_1
CTNNB1	0.0859023	0.261692	0.526364	1.1224	Olig_1
ZDHHC23	0.887728	0.263244	0.528564	1.11876	Olig_1
RAB8B	0.0969285	0.264689	0.530768	1.11538	Olig_1
RRP15	0.235187	0.265165	0.531498	1.11427	Olig_1
PRMT1	0.173477	0.265246	0.531498	1.11408	Olig_1
E2F5	0.38879	0.265604	0.531983	1.11324	Olig_1
GADD45B	0.219916	0.266731	0.533539	1.11062	Olig_1
TP53INP2	0.172514	0.267478	0.534877	1.10889	Olig_1
PFDN1	0.124131	0.267789	0.535423	1.10817	Olig_1
ANKRD12	0.0102948	0.270094	0.539168	1.10285	Olig_1
ARHGAP31	0.552875	0.270565	0.539952	1.10176	Olig_1
DSTN	0.0643875	0.271267	0.541118	1.10015	Olig_1
PYGL	0.456599	0.271819	0.541824	1.09888	Olig_1
MSRB3	0.780733	0.272477	0.542722	1.09738	Olig_1
CHD1	0.0700326	0.272493	0.542722	1.09734	Olig_1
C1orf94	0.814502	0.272995	0.543537	1.09619	Olig_1
ABHD10	0.163664	0.27353	0.544289	1.09497	Olig_1
GIT1	0.123374	0.273587	0.544323	1.09484	Olig_1
MTF2	0.0907808	0.27377	0.54453	1.09442	Olig_1
MNAT1	0.0510043	0.274567	0.545798	1.09261	Olig_1
RPS6KB1	0.0907666	0.274663	0.54591	1.09239	Olig_1
NPTXR	0.212218	0.27524	0.546979	1.09107	Olig_1
CA3	0.424078	0.275297	0.547012	1.09095	Olig_1
ILF2	0.183958	0.27622	0.548388	1.08885	Olig_1
NFIL3	0.453182	0.276229	0.548388	1.08883	Olig_1
PTPN21	0.161882	0.27661	0.549066	1.08797	Olig_1
ILF3	0.103763	0.277629	0.550771	1.08566	Olig_1
BARD1	0.148632	0.278761	0.552696	1.08311	Olig_1
KLHL9	0.161364	0.278948	0.552988	1.08269	Olig_1
MEST	0.549187	0.280111	0.554945	1.08007	Olig_1
DDX60L	0.320744	0.281438	0.5568	1.07709	Olig_1
UPF1	0.162853	0.281664	0.557117	1.07659	Olig_1
SPIDR	0.0418259	0.282288	0.558	1.07519	Olig_1
LRRC4C	0.0360946	0.283419	0.559995	1.07267	Olig_1
NEDD1	0.179405	0.284328	0.561064	1.07065	Olig_1
VPS54	0.0393701	0.284842	0.561916	1.06951	Olig_1
VRK1	0.171534	0.285137	0.562418	1.06885	Olig_1
POLE3	0.352959	0.285344	0.562666	1.06839	Olig_1
TIE1	0.501346	0.285636	0.562918	1.06774	Olig_1
SETD7	0.104059	0.286205	0.563796	1.06648	Olig_1
C12orf76	0.026285	0.287019	0.565091	1.06468	Olig_1
ULK1	0.145598	0.287475	0.565732	1.06368	Olig_1
NOL7	0.126065	0.288321	0.567111	1.06181	Olig_1
YES1	0.131214	0.288341	0.567111	1.06177	Olig_1
PIGU	0.0540327	0.288698	0.56765	1.06098	Olig_1
YTHDF3	0.0918634	0.289157	0.568127	1.05997	Olig_1
BMPER	0.438846	0.289685	0.56894	1.05881	Olig_1
UQCC1	0.104845	0.289787	0.568978	1.05859	Olig_1
PPID	0.158404	0.289941	0.5692	1.05825	Olig_1
SND1	0.0554806	0.290067	0.569364	1.05798	Olig_1
ISY1	0.312952	0.290921	0.570872	1.0561	Olig_1
SEMA4C	0.127364	0.291652	0.572067	1.05451	Olig_1
L3MBTL3	0.260627	0.292129	0.572757	1.05346	Olig_1
DEGS1	0.147724	0.293484	0.574369	1.05051	Olig_1
KIF26A	3.97238	0.294331	0.575857	1.04867	Olig_1
BEND6	0.161518	0.294338	0.575857	1.04865	Olig_1
SLC12A6	0.097563	0.296936	0.580135	1.04303	Olig_1
POLD2	0.202774	0.29735	0.580758	1.04213	Olig_1
ARHGAP24	0.238168	0.29776	0.581446	1.04125	Olig_1
LIMS2	0.820684	0.298475	0.582541	1.03971	Olig_1
SUSD5	0.596225	0.299381	0.5836	1.03776	Olig_1
SLC35A1	0.232979	0.299585	0.583796	1.03732	Olig_1
KLHDC3	0.169255	0.30018	0.584543	1.03605	Olig_1
PANK3	0.100107	0.300438	0.584796	1.03549	Olig_1
FBXO8	0.217522	0.301323	0.586103	1.0336	Olig_1
TM4SF1	1.8211	0.303116	0.588508	1.02977	Olig_1
HMX1	0.65179	0.303712	0.589409	1.02851	Olig_1
ENDOD1	0.0199595	0.304456	0.590441	1.02693	Olig_1
GBE1	0.115139	0.305479	0.591925	1.02475	Olig_1
C11orf68	0.288419	0.306983	0.593995	1.02157	Olig_1
MTHFD2L	0.0964418	0.307267	0.594385	1.02097	Olig_1
TATDN2	0.422341	0.307922	0.595302	1.01959	Olig_1
TCP1	0.146239	0.30949	0.597821	1.01629	Olig_1
SLC19A2	0.341642	0.311052	0.600354	1.01302	Olig_1
SNW1	0.0847453	0.313927	0.604375	1.00702	Olig_1
NCBP1	0.141812	0.314473	0.605257	1.00588	Olig_1
FRMD3	0.261398	0.315023	0.606147	1.00474	Olig_1
ZNF14	0.154721	0.315231	0.606462	1.00431	Olig_1
GRID1	0.0248799	0.31607	0.607906	1.00257	Olig_1
ABCE1	0.0978406	0.316176	0.607939	1.00235	Olig_1
DMTF1	0.00690093	0.31624	0.607977	1.00221	Olig_1
SOX4	0.865368	0.316944	0.609076	1.00076	Olig_1
ZNF677	0.216917	0.317126	0.60934	1.00038	Olig_1
RC3H2	0.0926572	0.317409	0.609712	0.999797	Olig_1
HIP1	0.00857613	0.319574	0.612843	0.995335	Olig_1
HNRNPA3	0.0266623	0.320756	0.614558	0.992906	Olig_1
MTPN	0.144967	0.323293	0.618681	0.987714	Olig_1
CSPG5	0.39497	0.323461	0.618875	0.987371	Olig_1
PEX19	0.301736	0.32486	0.621075	0.984519	Olig_1
GGH	0.617871	0.326962	0.624659	0.980252	Olig_1
RECQL	0.147139	0.327442	0.625402	0.979279	Olig_1
SHKBP1	0.24859	0.328256	0.626609	0.977632	Olig_1
FZD3	0.23606	0.330009	0.629344	0.974095	Olig_1
GNB4	0.306942	0.330837	0.630747	0.97243	Olig_1
TM4SF18	2.47658	0.331371	0.631677	0.971356	Olig_1
ZNF776	0.320545	0.331496	0.631828	0.971105	Olig_1
NIPAL3	0.0266121	0.335231	0.637533	0.963631	Olig_1
GPALPP1	0.0956365	0.335379	0.637725	0.963336	Olig_1
EIF3L	0.153042	0.335821	0.638301	0.962455	Olig_1
ADAR	0.0794435	0.337317	0.640525	0.95948	Olig_1
TOPBP1	0.190073	0.337605	0.640895	0.958907	Olig_1
GNAL	0.433896	0.337877	0.641323	0.958368	Olig_1
CNOT1	0.0659451	0.337937	0.641348	0.958249	Olig_1
AEN	0.68571	0.338335	0.641838	0.95746	Olig_1
SNX9	0.0114184	0.338455	0.641975	0.957223	Olig_1
ZMAT4	0.598465	0.339114	0.642941	0.955917	Olig_1
KBTBD7	0.214075	0.339151	0.642941	0.955845	Olig_1
PLRG1	0.141648	0.339268	0.643074	0.955613	Olig_1
TLK2	0.0372871	0.34079	0.64516	0.952605	Olig_1
SNX5	0.177817	0.340932	0.645251	0.952325	Olig_1
SMNDC1	0.20038	0.341551	0.646154	0.951105	Olig_1
FNDC3B	0.141394	0.34256	0.647797	0.949118	Olig_1
SMIM15	0.257849	0.343175	0.648869	0.947911	Olig_1
GFPT2	0.168222	0.343314	0.648955	0.947637	Olig_1
FBXL3	0.08559	0.344106	0.650093	0.946084	Olig_1
WRNIP1	0.132253	0.345828	0.65236	0.942713	Olig_1
C4orf46	0.375417	0.34693	0.653812	0.94056	Olig_1
CELF2	0.159131	0.3471	0.653974	0.94023	Olig_1
TRDMT1	0.182274	0.347449	0.65434	0.93955	Olig_1
TMEM59L	0.175103	0.347632	0.654507	0.939192	Olig_1
IFT74	0.132852	0.347728	0.654597	0.939006	Olig_1
FAM78B	0.444519	0.3479	0.654832	0.93867	Olig_1
XPA	0.0674558	0.348407	0.655573	0.937684	Olig_1
ACTB	0.000122682	0.350549	0.658735	0.933525	Olig_1
CASP7	0.536744	0.351161	0.659795	0.93234	Olig_1
GRHPR	0.0652801	0.351344	0.660049	0.931985	Olig_1
BMI1	0.133433	0.352902	0.662252	0.928975	Olig_1
GIGYF1	0.124092	0.35323	0.662595	0.928343	Olig_1
TIGD2	0.667425	0.353456	0.662796	0.927906	Olig_1
ZNF530	0.582615	0.353807	0.663313	0.92723	Olig_1
VPS4A	0.145905	0.354488	0.663959	0.925919	Olig_1
NSMAF	0.120065	0.355007	0.664841	0.92492	Olig_1
ABTB1	0.243276	0.35532	0.665283	0.92432	Olig_1
BSCL2	0.265526	0.356404	0.666636	0.922239	Olig_1
CRK	0.103557	0.3565	0.666638	0.922054	Olig_1
DEPDC5	0.142905	0.35797	0.669112	0.919241	Olig_1
SLC35G1	0.579275	0.35851	0.669655	0.918208	Olig_1
U2SURP	0.00645885	0.359237	0.670751	0.91682	Olig_1
GOLGA8B	0.116335	0.361228	0.673554	0.913028	Olig_1
TTC17	0.00993038	0.362179	0.674779	0.91122	Olig_1
TP53I11	1.05273	0.36251	0.675178	0.910592	Olig_1
CRISPLD1	0.8533	0.362541	0.675178	0.910534	Olig_1
CDK13	0.00639449	0.362624	0.675241	0.910377	Olig_1
RBBP4	0.0711783	0.363306	0.676419	0.909084	Olig_1
RNF167	0.153356	0.36581	0.679884	0.90435	Olig_1
UBALD2	0.174024	0.368092	0.682868	0.900053	Olig_1
ZDHHC6	0.17069	0.368137	0.682868	0.899969	Olig_1
CCDC107	0.20464	0.36816	0.682868	0.899925	Olig_1
AQP4	0.196525	0.368413	0.68306	0.89945	Olig_1
MEPCE	0.394302	0.370966	0.687051	0.894666	Olig_1
NEK6	0.452294	0.371055	0.687123	0.8945	Olig_1
CAPN13	0.168451	0.371149	0.687206	0.894323	Olig_1
ANKRD46	0.171209	0.371849	0.687922	0.893015	Olig_1
WBP11	0.109479	0.371887	0.687922	0.892945	Olig_1
TMEM9	0.175237	0.372555	0.688774	0.891697	Olig_1
POLE	0.314632	0.372597	0.688774	0.891619	Olig_1
CDK11A	0.212517	0.372799	0.688962	0.891242	Olig_1
ADAM22	0.067419	0.373073	0.689375	0.890732	Olig_1
COA4	0.0958489	0.373452	0.689796	0.890027	Olig_1
CA13	0.283356	0.374398	0.691174	0.888265	Olig_1
VKORC1	0.209085	0.375169	0.692225	0.886832	Olig_1
ABHD3	0.208888	0.375599	0.692645	0.886035	Olig_1
CADPS	0.142568	0.376401	0.693474	0.884547	Olig_1
NUP35	0.183317	0.377819	0.695527	0.881922	Olig_1
MIOS	0.160628	0.377876	0.695539	0.881816	Olig_1
LMO3	0.294948	0.379011	0.697067	0.879721	Olig_1
SPOP	0.0733769	0.379749	0.697772	0.878358	Olig_1
LCNL1	0.212368	0.380857	0.699153	0.876319	Olig_1
SELL	0.481275	0.381018	0.699188	0.876022	Olig_1
SYS1	0.301439	0.381091	0.699209	0.875888	Olig_1
CLDN15	0.245852	0.381674	0.699906	0.874816	Olig_1
RPL10A	0.0386706	0.382064	0.70021	0.8741	Olig_1
ZMAT2	0.14658	0.382171	0.700255	0.873904	Olig_1
CSRNP1	0.437314	0.382485	0.700644	0.873327	Olig_1
HOOK3	0.013619	0.382918	0.701345	0.872532	Olig_1
SALL2	0.480284	0.383687	0.702378	0.871124	Olig_1
RGS1	0.521779	0.38445	0.703121	0.869726	Olig_1
DDX19A	0.153182	0.386606	0.706405	0.865789	Olig_1
ETV3	0.223656	0.387544	0.707461	0.864079	Olig_1
SCRN1	0.0954225	0.388213	0.708493	0.862863	Olig_1
FAM98B	0.140865	0.389374	0.710424	0.860753	Olig_1
CCDC134	0.261614	0.392609	0.714146	0.854895	Olig_1
SLC12A4	0.470699	0.392919	0.714344	0.854335	Olig_1
DCAF7	0.101824	0.392926	0.714344	0.854323	Olig_1
DNTTIP2	0.197225	0.395364	0.717687	0.84993	Olig_1
HES6	0.167216	0.395404	0.717687	0.849858	Olig_1
TMEM184C	0.142344	0.395874	0.718373	0.849014	Olig_1
PAWR	0.727577	0.397702	0.721216	0.845732	Olig_1
BMF	1.38198	0.399394	0.72352	0.842704	Olig_1
FGD3	0.956448	0.400033	0.724487	0.841563	Olig_1
E2F1	0.468652	0.401122	0.726088	0.83962	Olig_1
ABCF2	0.312293	0.401333	0.726363	0.839242	Olig_1
SAFB	0.0604478	0.401598	0.726554	0.838771	Olig_1
NAA50	0.125966	0.403051	0.728226	0.836184	Olig_1
LRPPRC	0.04014	0.403108	0.728232	0.836084	Olig_1
MCL1	0.152789	0.40317	0.728249	0.835973	Olig_1
PDIA5	0.289489	0.40419	0.729804	0.834161	Olig_1
KCNK6	0.687414	0.407378	0.734388	0.828516	Olig_1
IP6K2	0.0936159	0.407381	0.734388	0.828512	Olig_1
ZNF217	0.320467	0.407567	0.734551	0.828182	Olig_1
IMMP1L	0.104908	0.408407	0.735582	0.826701	Olig_1
IP6K1	0.0931675	0.408705	0.73583	0.826174	Olig_1
ANGPTL1	1.15552	0.409188	0.736217	0.825323	Olig_1
HBEGF	0.226601	0.409607	0.736874	0.824586	Olig_1
PIK3R4	0.116253	0.410937	0.738262	0.822245	Olig_1
RELT	0.143441	0.411679	0.738776	0.820943	Olig_1
GTF3C4	0.278146	0.411963	0.739081	0.820445	Olig_1
NUBPL	0.0547823	0.412383	0.739738	0.819708	Olig_1
MAP2K7	0.122123	0.412593	0.739922	0.819339	Olig_1
POU6F1	0.110381	0.412897	0.740275	0.818805	Olig_1
ZNF440	0.233191	0.413495	0.74096	0.817759	Olig_1
HECW1	0.255248	0.415241	0.743022	0.814706	Olig_1
RGPD5	0.429878	0.416752	0.744854	0.812069	Olig_1
BCL10	0.307971	0.417522	0.745662	0.810728	Olig_1
ALDH5A1	0.53867	0.418675	0.747319	0.808722	Olig_1
ATP2A2	0.0434846	0.418855	0.747543	0.80841	Olig_1
HNMT	0.283041	0.42144	0.750534	0.803926	Olig_1
MAP3K5	0.268888	0.421753	0.750767	0.803383	Olig_1
KLHDC10	0.100638	0.423124	0.752798	0.801014	Olig_1
KRR1	0.129983	0.424902	0.755108	0.797946	Olig_1
SIK2	0.0247776	0.424906	0.755108	0.797938	Olig_1
BCL7A	0.100983	0.425244	0.75561	0.797357	Olig_1
GPC1	0.176853	0.428242	0.759171	0.792204	Olig_1
SYF2	0.158986	0.42872	0.759921	0.791384	Olig_1
GSTP1	0.0220434	0.42879	0.759946	0.791265	Olig_1
NFIX	0.00687364	0.429324	0.760615	0.790348	Olig_1
WARS2	0.154166	0.429574	0.760846	0.789921	Olig_1
CTSL	0.101183	0.430462	0.762124	0.788401	Olig_1
DPYSL3	0.429215	0.431709	0.763598	0.786271	Olig_1
ZNF586	0.109574	0.432353	0.764291	0.785171	Olig_1
HDGF	0.129065	0.433386	0.765739	0.78341	Olig_1
ZNF853	0.31554	0.433439	0.765739	0.78332	Olig_1
R3HDM4	0.253877	0.433451	0.765739	0.7833	Olig_1
CRNKL1	0.169164	0.433774	0.766114	0.782749	Olig_1
LRRN3	0.278188	0.43387	0.766155	0.782586	Olig_1
TMEM38B	0.115699	0.434635	0.767116	0.781285	Olig_1
APC2	0.109649	0.434677	0.767116	0.781213	Olig_1
ZFAT	0.216867	0.436306	0.768844	0.778446	Olig_1
MRPL28	0.19348	0.436327	0.768844	0.778411	Olig_1
ELAVL3	0.0167552	0.436877	0.769616	0.777478	Olig_1
SSB	0.104104	0.437901	0.770645	0.775743	Olig_1
RPE	0.104003	0.439735	0.77346	0.772641	Olig_1
ARSK	0.242508	0.441316	0.775645	0.769974	Olig_1
SDE2	0.184858	0.4415	0.775871	0.769662	Olig_1
IL1RAP	0.440365	0.4425	0.777429	0.767979	Olig_1
ZNF180	0.205656	0.442965	0.777748	0.767197	Olig_1
TYW3	0.119947	0.44469	0.779881	0.764298	Olig_1
IPO7	0.0693218	0.445061	0.780334	0.763674	Olig_1
MAP3K2	0.0244341	0.445255	0.780574	0.763349	Olig_1
SLC48A1	0.022031	0.445512	0.780826	0.762918	Olig_1
MATN4	1.7195	0.449181	0.785452	0.756781	Olig_1
FUBP1	0.0341559	0.44975	0.786068	0.755833	Olig_1
PXMP2	0.672512	0.449907	0.786221	0.755571	Olig_1
PROM1	0.989178	0.450162	0.786568	0.755145	Olig_1
SMAD3	0.630885	0.450357	0.786708	0.75482	Olig_1
EIF4B	0.0890454	0.450502	0.786861	0.754579	Olig_1
RNASE4	1.6739	0.451227	0.787428	0.75337	Olig_1
ZNF850	0.245251	0.451337	0.787519	0.753188	Olig_1
KCNH2	0.631286	0.453681	0.790206	0.749292	Olig_1
STX5	0.133383	0.455491	0.792956	0.746292	Olig_1
CALCOCO1	0.108806	0.457882	0.796312	0.742339	Olig_1
PLB1	0.480935	0.459971	0.799419	0.738895	Olig_1
ERN1	0.221405	0.460065	0.799419	0.73874	Olig_1
DCUN1D5	0.141995	0.460076	0.799419	0.738721	Olig_1
UBL3	0.0159039	0.460983	0.800793	0.737229	Olig_1
TMED5	0.107104	0.463865	0.804782	0.732497	Olig_1
RDH14	0.205502	0.46432	0.805369	0.731751	Olig_1
NOLC1	0.147483	0.464752	0.805914	0.731044	Olig_1
AEBP1	0.471782	0.465926	0.807747	0.729123	Olig_1
TGIF2	1.08842	0.466759	0.808578	0.727763	Olig_1
ZBTB18	0.160267	0.466859	0.80865	0.727599	Olig_1
RSL1D1	0.155567	0.467521	0.809559	0.726519	Olig_1
[truncated: 94,223 more rows]

## Sheet: MC_SC_OPCs_Subclusters
gene	logfoldchanges	pvals	pvals_adj	scores	cluster
CENPK	7.21929	1.74826e-105	2.40316e-101	21.813	CyPs
HELLS	4.70069	6.46763e-97	4.44521e-93	20.891	CyPs
BRIP1	7.21125	3.43449e-94	1.57368e-90	20.5891	CyPs
MMS22L	3.97458	5.15175e-91	1.7704e-87	20.2317	CyPs
RFC3	4.16498	7.38479e-90	2.03023e-86	20.1	CyPs
PRIM2	3.13268	1.24505e-87	2.8524e-84	19.8439	CyPs
ATAD2	3.73818	4.32554e-74	8.49413e-71	18.2097	CyPs
FANCI	3.98128	6.15963e-74	1.05838e-70	18.1903	CyPs
BRCA1	4.02816	1.06438e-72	1.62567e-69	18.0334	CyPs
DTL	8.39231	6.27716e-70	8.62859e-67	17.6773	CyPs
FANCC	2.90409	1.14614e-69	1.43226e-66	17.6433	CyPs
CEP128	2.85354	8.80386e-65	1.00848e-61	16.9959	CyPs
SYNE2	2.99991	3.40272e-63	3.59798e-60	16.7803	CyPs
RAD18	2.6011	6.12645e-63	6.0153e-60	16.7453	CyPs
EZH2	4.0571	3.55811e-60	3.26065e-57	16.3622	CyPs
DIAPH3	4.95667	8.6563e-60	7.43684e-57	16.308	CyPs
ATAD5	3.32533	1.67535e-56	1.35467e-53	15.839	CyPs
CNTLN	2.24347	5.2444e-55	4.00498e-52	15.6209	CyPs
KNTC1	4.4133	2.86938e-51	2.07592e-48	15.0622	CyPs
FANCA	4.53174	1.99149e-50	1.36875e-47	14.9336	CyPs
BRCA2	6.33831	2.3084e-50	1.51102e-47	14.9238	CyPs
CCDC14	1.88073	5.29884e-50	3.31081e-47	14.8682	CyPs
GRM8	2.81313	6.66289e-50	3.98209e-47	14.8529	CyPs
POLQ	5.5231	4.06528e-47	2.32839e-44	14.4167	CyPs
ZNF730	2.65873	7.13376e-47	3.92243e-44	14.3778	CyPs
GLYATL2	2.80458	3.43695e-46	1.81709e-43	14.2685	CyPs
NCAPG2	3.83808	1.18728e-44	5.82869e-42	14.0193	CyPs
WDHD1	4.07276	1.01938e-42	4.83185e-40	13.6997	CyPs
ZNF367	5.58683	1.4429e-42	6.61139e-40	13.6745	CyPs
MYBL1	4.429	1.80116e-42	7.98671e-40	13.6583	CyPs
RAD51B	1.83875	2.24103e-41	9.62663e-39	13.4735	CyPs
BARD1	2.50641	8.15725e-41	3.39787e-38	13.3778	CyPs
SMC2	3.48263	1.41272e-40	5.71156e-38	13.3369	CyPs
POLE2	2.9862	1.31405e-39	5.16084e-37	13.1695	CyPs
PRKDC	1.56799	2.83313e-39	1.05255e-36	13.1114	CyPs
TOPBP1	2.50922	3.32875e-38	1.20413e-35	12.9232	CyPs
AGBL4	1.83542	3.80758e-38	1.34203e-35	12.9129	CyPs
SMC4	4.15036	8.6734e-38	2.90792e-35	12.8494	CyPs
RTTN	2.05726	3.06813e-36	9.80804e-34	12.5705	CyPs
CHEK1	5.40298	3.63933e-36	1.13696e-33	12.557	CyPs
FANCL	1.61082	2.07132e-35	6.32718e-33	12.4186	CyPs
LIG1	3.85924	2.75371e-35	8.2288e-33	12.3958	CyPs
VRK1	3.06847	3.8263e-35	1.11907e-32	12.3694	CyPs
GINS1	4.99949	2.02649e-34	5.80337e-32	12.2348	CyPs
ZNF83	1.78366	7.2157e-34	2.02423e-31	12.1312	CyPs
RB1	1.48935	2.88884e-33	7.94199e-31	12.0171	CyPs
FAM111B	8.52847	1.22665e-32	3.30618e-30	11.897	CyPs
XRCC2	4.81052	4.12743e-32	1.09107e-29	11.7953	CyPs
NASP	1.41745	2.04231e-31	5.26154e-29	11.6599	CyPs
CEP152	3.71485	2.06695e-31	5.26154e-29	11.6589	CyPs
LMNB1	3.07544	2.16646e-31	5.41458e-29	11.6549	CyPs
ITGB3BP	1.93777	2.31397e-31	5.67996e-29	11.6493	CyPs
FAT3	1.89611	4.6743e-31	1.12724e-28	11.5892	CyPs
ZNF718	1.56948	2.27867e-30	5.40045e-28	11.4527	CyPs
DNMT1	1.99181	3.29745e-30	7.6825e-28	11.4207	CyPs
WDR76	4.19224	4.77048e-30	1.09292e-27	11.3885	CyPs
SPIDR	1.10733	8.70717e-30	1.96211e-27	11.336	CyPs
MELK	5.34487	1.25308e-29	2.77819e-27	11.304	CyPs
DEK	1.79828	2.10302e-29	4.58859e-27	11.2585	CyPs
RAD51AP1	5.70536	2.29638e-29	4.93219e-27	11.2507	CyPs
MCM8	4.30895	4.71176e-29	9.96428e-27	11.1872	CyPs
CTDSPL2	1.52723	1.38862e-28	2.89213e-26	11.0909	CyPs
CDK5RAP2	1.54792	2.29818e-28	4.71505e-26	11.0458	CyPs
NFIC	1.72891	7.81633e-28	1.58005e-25	10.9353	CyPs
MIS18BP1	3.65246	9.78559e-28	1.94946e-25	10.9149	CyPs
RFWD3	3.32474	2.74512e-27	5.39063e-25	10.8208	CyPs
DNAJC9	1.98702	4.4986e-27	8.70955e-25	10.7754	CyPs
FANCD2	4.30159	7.25933e-27	1.38593e-24	10.7313	CyPs
CMSS1	1.37539	1.01367e-26	1.90875e-24	10.7004	CyPs
SUZ12	1.41127	1.13636e-26	2.11087e-24	10.6898	CyPs
TUBA1B	1.98899	1.66018e-26	3.00274e-24	10.6546	CyPs
APOLD1	3.75933	1.90358e-26	3.39825e-24	10.6418	CyPs
NCAPD3	2.61001	2.25904e-26	3.98113e-24	10.6259	CyPs
GEN1	2.6592	2.48439e-26	4.32283e-24	10.617	CyPs
DNA2	3.24817	2.62998e-26	4.40874e-24	10.6117	CyPs
USP37	1.67237	6.93672e-26	1.13515e-23	10.5207	CyPs
NUP107	1.93515	1.11498e-25	1.80311e-23	10.4759	CyPs
ORC6	5.57966	1.46048e-25	2.33439e-23	10.4503	CyPs
RRM1	2.83346	1.98356e-25	3.06359e-23	10.4212	CyPs
ZWILCH	4.45167	2.30766e-25	3.52457e-23	10.4068	CyPs
RBBP8	2.85346	2.61551e-25	3.95086e-23	10.3949	CyPs
FAM111A	3.01423	3.47721e-25	5.1954e-23	10.3677	CyPs
GSTCD	1.63838	4.71327e-25	6.96652e-23	10.3386	CyPs
DDX11	2.83765	1.44559e-24	2.08424e-22	10.2306	CyPs
TMPO	2.47314	1.4556e-24	2.08424e-22	10.23	CyPs
FRMD5	1.21211	1.52448e-24	2.16036e-22	10.2255	CyPs
KIF20B	3.50575	1.66381e-24	2.33375e-22	10.217	CyPs
CCDC18	2.66442	2.27592e-24	3.16008e-22	10.1866	CyPs
EPB41L3	2.02726	4.22268e-24	5.80449e-22	10.1263	CyPs
GAP43	1.87887	5.88652e-24	7.93296e-22	10.0938	CyPs
RGS17	1.41868	5.96116e-24	7.95555e-22	10.0925	CyPs
POLE	3.32315	9.38052e-24	1.23985e-21	10.0479	CyPs
ECT2	3.89305	1.04684e-23	1.37047e-21	10.0371	CyPs
IPO9	1.43871	1.66692e-23	2.14145e-21	9.99112	CyPs
AHI1	1.0482	2.06725e-23	2.63115e-21	9.96976	CyPs
PARPBP	4.48548	3.07475e-23	3.87757e-21	9.93025	CyPs
NDUFAF6	1.54727	6.2425e-23	7.80086e-21	9.85939	CyPs
DSN1	4.12755	7.09042e-23	8.78062e-21	9.8466	CyPs
SORBS1	1.22593	7.32275e-23	8.94218e-21	9.84335	CyPs
WEE1	3.95606	7.35098e-23	8.94218e-21	9.84297	CyPs
ACYP1	2.48819	8.4772e-23	1.02217e-20	9.82862	CyPs
MSH2	1.47749	1.32958e-22	1.58925e-20	9.78319	CyPs
DUT	1.84544	1.95285e-22	2.31413e-20	9.74421	CyPs
TENM4	1.57816	2.10099e-22	2.4684e-20	9.73678	CyPs
KCNH1	2.06077	6.89928e-22	8.00063e-20	9.61517	CyPs
SFI1	2.40714	6.9262e-22	8.00063e-20	9.61477	CyPs
SMC5	1.19191	1.04355e-21	1.19539e-19	9.5725	CyPs
MCM3	4.06484	1.23917e-21	1.39879e-19	9.55472	CyPs
KPNB1	1.36686	1.24147e-21	1.39879e-19	9.55453	CyPs
CDC7	1.97397	2.13131e-21	2.36266e-19	9.4984	CyPs
MAST2	1.37919	2.17969e-21	2.39696e-19	9.49607	CyPs
NCAPG	6.01635	2.60478e-21	2.84169e-19	9.47749	CyPs
RIMS2	0.891187	3.71409e-21	4.01999e-19	9.44039	CyPs
MCM4	3.93936	4.46261e-21	4.79243e-19	9.42113	CyPs
MCM10	7.28924	4.57344e-21	4.87337e-19	9.41855	CyPs
BEST3	1.19494	5.32119e-21	5.62654e-19	9.40264	CyPs
E2F3	1.91676	7.1369e-21	7.48885e-19	9.37171	CyPs
ADK	1.09997	7.75654e-21	8.07738e-19	9.36292	CyPs
UGGT2	0.94516	7.91448e-21	8.17989e-19	9.36079	CyPs
CLSPN	6.14674	1.19479e-20	1.22564e-18	9.31718	CyPs
NAP1L1	1.12596	1.24813e-20	1.27087e-18	9.31254	CyPs
CDKAL1	0.928972	2.10847e-20	2.13111e-18	9.2567	CyPs
GLIS3	2.24247	4.56283e-20	4.54498e-18	9.17388	CyPs
CEP135	2.66264	5.19701e-20	5.13943e-18	9.15985	CyPs
KCNQ5	2.16532	5.87035e-20	5.72296e-18	9.14669	CyPs
FNDC3A	1.0016	7.31636e-20	7.08244e-18	9.12287	CyPs
ZRANB3	1.55085	1.72922e-19	1.6393e-17	9.02921	CyPs
PPM1E	1.38174	2.32373e-19	2.1878e-17	8.99681	CyPs
TTLL5	1.34236	2.42234e-19	2.26513e-17	8.99224	CyPs
SCMH1	1.03844	3.13785e-19	2.91438e-17	8.96376	CyPs
RIF1	1.11252	3.5339e-19	3.25753e-17	8.95065	CyPs
RTKN2	4.0701	3.55471e-19	3.25753e-17	8.95	CyPs
FUS	1.02725	3.82194e-19	3.47923e-17	8.942	CyPs
CCDC15	3.84988	4.35436e-19	3.93783e-17	8.92758	CyPs
TOP2A	7.9291	4.63474e-19	4.164e-17	8.92067	CyPs
CCDC138	1.9712	5.32068e-19	4.74923e-17	8.90537	CyPs
CEP78	1.55799	5.92253e-19	5.25233e-17	8.89348	CyPs
C21orf58	4.09976	6.94858e-19	6.12276e-17	8.87571	CyPs
LCORL	1.16094	7.02216e-19	6.14819e-17	8.87454	CyPs
MCM6	3.94942	8.27155e-19	7.14623e-17	8.8563	CyPs
MTBP	2.77885	8.30319e-19	7.14623e-17	8.85587	CyPs
CEP192	1.15764	8.31804e-19	7.14623e-17	8.85567	CyPs
KIF11	4.8153	1.04583e-18	8.92915e-17	8.8301	CyPs
NEURL1B	2.72499	1.1565e-18	9.81315e-17	8.81884	CyPs
FBLN7	2.43172	1.43751e-18	1.21227e-16	8.79445	CyPs
STK3	1.27469	1.47084e-18	1.23281e-16	8.79188	CyPs
CHAF1A	4.10976	1.60688e-18	1.33868e-16	8.78193	CyPs
LIN54	1.78475	1.79322e-18	1.48491e-16	8.76959	CyPs
MAGI3	1.1253	2.10503e-18	1.73268e-16	8.75152	CyPs
HMGN2	1.93484	2.18589e-18	1.78853e-16	8.74726	CyPs
SUPT16H	1.70411	2.64226e-18	2.14914e-16	8.72583	CyPs
CEP112	1.76343	3.56885e-18	2.86885e-16	8.69175	CyPs
TEAD1	1.07794	5.97928e-18	4.77856e-16	8.63294	CyPs
TUBGCP3	1.33284	6.191e-18	4.91916e-16	8.62896	CyPs
LIN9	3.14884	6.88242e-18	5.43711e-16	8.61685	CyPs
ZNF519	1.73933	6.96267e-18	5.46908e-16	8.61552	CyPs
RBFOX1	0.982289	7.69129e-18	6.00707e-16	8.60411	CyPs
RGL1	1.46835	8.19754e-18	6.3663e-16	8.59679	CyPs
RNASEH2B	1.34333	1.06118e-17	8.14916e-16	8.56711	CyPs
XPO1	1.05828	1.24926e-17	9.54019e-16	8.54829	CyPs
TACC3	4.47937	1.43912e-17	1.08693e-15	8.53194	CyPs
POLD3	2.05771	1.96414e-17	1.47536e-15	8.49589	CyPs
NUF2	3.48785	2.01914e-17	1.50843e-15	8.49269	CyPs
TTC28	0.830931	2.52109e-17	1.87324e-15	8.46685	CyPs
SIMC1	1.3759	2.63698e-17	1.94882e-15	8.46162	CyPs
WDR62	5.55574	2.79436e-17	2.04564e-15	8.45485	CyPs
PHTF2	1.07969	3.11856e-17	2.26813e-15	8.44204	CyPs
GPC6	1.09925	3.27693e-17	2.37077e-15	8.43625	CyPs
FAF1	0.751836	3.51016e-17	2.52621e-15	8.4282	CyPs
DGKH	1.33095	3.69672e-17	2.64662e-15	8.42214	CyPs
SMCHD1	0.932776	4.72644e-17	3.33178e-15	8.39331	CyPs
SCLT1	1.09218	5.56738e-17	3.90455e-15	8.37404	CyPs
FANCM	2.38031	6.43022e-17	4.46413e-15	8.35706	CyPs
KATNAL1	1.69305	6.56687e-17	4.53609e-15	8.35458	CyPs
ADCY3	1.9284	8.37898e-17	5.75888e-15	8.32576	CyPs
CAMK2D	0.928479	1.01593e-16	6.87932e-15	8.30291	CyPs
TRIM24	1.08648	1.03021e-16	6.94181e-15	8.30125	CyPs
ERI2	2.14308	1.15231e-16	7.72663e-15	8.28794	CyPs
PDZRN3	1.90394	2.52816e-16	1.67078e-14	8.19394	CyPs
ASCC3	0.939277	2.58356e-16	1.69922e-14	8.19133	CyPs
RANBP17	1.43995	3.09395e-16	2.02521e-14	8.16961	CyPs
IKBIP	2.67359	3.60452e-16	2.33716e-14	8.15116	CyPs
SLC20A1	2.06278	4.1416e-16	2.6603e-14	8.13435	CyPs
CD44	2.69907	4.45813e-16	2.8503e-14	8.12542	CyPs
ABHD3	1.98946	5.83525e-16	3.69638e-14	8.09271	CyPs
RACGAP1	2.76984	5.92926e-16	3.7387e-14	8.09076	CyPs
PDE8A	0.991025	6.6046e-16	4.14552e-14	8.07761	CyPs
SPATS2L	1.05365	7.47663e-16	4.67154e-14	8.06247	CyPs
ANKRD36C	0.870851	1.03802e-15	6.45641e-14	8.02228	CyPs
KIAA1328	1.01875	1.06979e-15	6.62402e-14	8.01857	CyPs
XYLB	1.77789	1.26588e-15	7.80306e-14	7.99787	CyPs
RSRC1	1.0912	1.29899e-15	7.97139e-14	7.99469	CyPs
KIF24	4.87286	1.91055e-15	1.15694e-13	7.94702	CyPs
UHRF2	1.13718	1.92458e-15	1.16032e-13	7.94611	CyPs
STK32B	0.915746	2.31197e-15	1.38779e-13	7.92335	CyPs
TPX2	6.09503	2.50706e-15	1.49186e-13	7.91327	CyPs
STIL	4.76483	2.71608e-15	1.60928e-13	7.9033	CyPs
BCL2	1.27304	3.02975e-15	1.78742e-13	7.88967	CyPs
NSMCE2	0.964634	3.05526e-15	1.79477e-13	7.88863	CyPs
SIPA1L1	0.876415	4.1789e-15	2.42376e-13	7.84944	CyPs
HNRNPF	1.75784	4.92015e-15	2.82981e-13	7.82894	CyPs
BUB1	7.48826	6.07899e-15	3.48174e-13	7.8023	CyPs
EPB41L2	0.930391	6.10641e-15	3.48293e-13	7.80173	CyPs
CHTF18	3.75975	6.74086e-15	3.81316e-13	7.78925	CyPs
SFMBT2	1.59531	8.31805e-15	4.64797e-13	7.76264	CyPs
CDK6	1.01882	8.87157e-15	4.93719e-13	7.75447	CyPs
NUCKS1	0.986921	9.35092e-15	5.18297e-13	7.74779	CyPs
SKA2	1.65889	9.87403e-15	5.45094e-13	7.74087	CyPs
FUT9	0.961563	1.02797e-14	5.65217e-13	7.73575	CyPs
WRN	1.01256	1.581e-14	8.58992e-13	7.6808	CyPs
EEA1	0.929135	1.77656e-14	9.61439e-13	7.66585	CyPs
KCNMA1	0.607045	1.95811e-14	1.05554e-12	7.65335	CyPs
HMGB2	3.52922	2.15862e-14	1.15908e-12	7.64081	CyPs
CENPF	6.56732	2.38372e-14	1.27497e-12	7.62803	CyPs
EHBP1	0.870221	3.12721e-14	1.65971e-12	7.59294	CyPs
PRTFDC1	1.02556	3.39092e-14	1.79275e-12	7.58245	CyPs
ARL6IP6	1.5648	3.69115e-14	1.94401e-12	7.57144	CyPs
SAE1	1.84031	3.7879e-14	1.98735e-12	7.56808	CyPs
ASAP2	1.13034	4.65501e-14	2.433e-12	7.54125	CyPs
TMEM106C	2.80338	4.79915e-14	2.49883e-12	7.53727	CyPs
PCNA	3.41283	5.72327e-14	2.9576e-12	7.51426	CyPs
PHIP	0.830469	6.1595e-14	3.1711e-12	7.50465	CyPs
VMP1	1.33905	6.94039e-14	3.5598e-12	7.48899	CyPs
RPA1	1.82156	7.04257e-14	3.59878e-12	7.48707	CyPs
RBBP4	1.05407	7.13403e-14	3.63201e-12	7.48538	CyPs
EXO1	6.6324	8.18081e-14	4.14957e-12	7.46738	CyPs
MPHOSPH9	1.13018	9.68794e-14	4.89597e-12	7.44509	CyPs
TTF2	2.52874	1.21848e-13	6.13524e-12	7.41476	CyPs
CCNE2	3.04294	1.70022e-13	8.52963e-12	7.37047	CyPs
MASTL	3.5215	1.76631e-13	8.79698e-12	7.36539	CyPs
GPD2	0.880621	1.81591e-13	9.01139e-12	7.36169	CyPs
ANLN	2.65949	1.90175e-13	9.40338e-12	7.35553	CyPs
MTHFD1L	1.07648	1.99491e-13	9.82867e-12	7.34914	CyPs
NUP210	1.36278	2.04065e-13	1.00182e-11	7.34611	CyPs
DPYD	1.44627	2.32687e-13	1.13826e-11	7.32853	CyPs
HMGXB4	1.45277	2.60863e-13	1.26707e-11	7.3132	CyPs
BICC1	2.10311	2.95673e-13	1.42608e-11	7.29635	CyPs
AMOTL1	1.56161	4.09388e-13	1.96764e-11	7.25242	CyPs
SDK1	1.05596	4.15877e-13	1.99186e-11	7.25029	CyPs
DENND6A	1.21131	4.42362e-13	2.10405e-11	7.24192	CyPs
EXOC6	0.843565	4.49279e-13	2.12958e-11	7.23982	CyPs
ADAMTS9	1.38411	4.59068e-13	2.16851e-11	7.2369	CyPs
PDS5B	0.843836	4.69312e-13	2.2093e-11	7.2339	CyPs
TTLL7	0.80042	5.52777e-13	2.59334e-11	7.21165	CyPs
CDC45	7.55935	5.90427e-13	2.76055e-11	7.20267	CyPs
MCM7	2.66039	6.3323e-13	2.95064e-11	7.19313	CyPs
ZNF738	1.74153	6.39754e-13	2.97096e-11	7.19173	CyPs
ZNF107	1.40433	7.23729e-13	3.34962e-11	7.17488	CyPs
SRGAP1	0.915792	7.84089e-13	3.61681e-11	7.16391	CyPs
PTMA	0.949385	8.27388e-13	3.80377e-11	7.15654	CyPs
CBX5	1.06203	8.39659e-13	3.84732e-11	7.15452	CyPs
DHFR	2.10189	8.81413e-13	4.01189e-11	7.14786	CyPs
ST3GAL3	1.25988	9.77076e-13	4.41805e-11	7.1337	CyPs
NUP205	1.24381	1.01932e-12	4.59395e-11	7.12787	CyPs
PRIMPOL	1.35718	1.09325e-12	4.91103e-11	7.11823	CyPs
NDC1	2.01983	1.23905e-12	5.5479e-11	7.10095	CyPs
RMI1	1.56358	1.26199e-12	5.62276e-11	7.09841	CyPs
QSER1	1.06422	1.26395e-12	5.62276e-11	7.0982	CyPs
BUB1B	7.31321	1.37657e-12	6.10398e-11	7.08639	CyPs
GMPS	1.23664	1.40467e-12	6.20853e-11	7.08359	CyPs
PLCE1	0.910584	1.47373e-12	6.49293e-11	7.07694	CyPs
ATR	0.966135	1.65172e-12	7.25384e-11	7.06111	CyPs
XRCC5	0.813892	1.72216e-12	7.53909e-11	7.05531	CyPs
ANXA5	1.19202	1.92013e-12	8.37909e-11	7.04016	CyPs
CENPC	1.05318	2.16442e-12	9.38553e-11	7.02346	CyPs
LIN52	1.06613	2.20774e-12	9.54328e-11	7.02069	CyPs
RNF168	1.23142	2.2994e-12	9.90834e-11	7.01501	CyPs
SSH2	0.771944	2.44479e-12	1.05019e-10	7.00643	CyPs
E2F1	5.57594	2.85193e-12	1.21747e-10	6.98483	CyPs
MCM5	3.58333	2.97153e-12	1.2646e-10	6.97906	CyPs
MNS1	2.97075	3.40527e-12	1.43585e-10	6.95989	CyPs
ZNF678	1.13325	3.47887e-12	1.4624e-10	6.95688	CyPs
CEP57L1	1.53506	3.57702e-12	1.49908e-10	6.95296	CyPs
TBC1D1	1.15075	3.65752e-12	1.52815e-10	6.94982	CyPs
ASPM	5.7102	3.67782e-12	1.53198e-10	6.94904	CyPs
WLS	0.965148	3.78951e-12	1.57373e-10	6.94482	CyPs
GMNN	2.77543	4.56489e-12	1.87871e-10	6.91849	CyPs
GPR137C	1.02917	4.67974e-12	1.92023e-10	6.91497	CyPs
RALY	1.36036	5.1042e-12	2.08816e-10	6.90265	CyPs
KIF14	5.36795	5.25565e-12	2.14374e-10	6.89849	CyPs
NAALADL2	0.721893	5.60887e-12	2.28105e-10	6.88925	CyPs
YPEL1	1.61664	6.30197e-12	2.55536e-10	6.87265	CyPs
ZNF804A	0.922568	6.33382e-12	2.56073e-10	6.87193	CyPs
NPAT	1.26014	7.46419e-12	3.00888e-10	6.84847	CyPs
RFC4	3.37314	7.71044e-12	3.09905e-10	6.84383	CyPs
NDC80	6.3513	7.99512e-12	3.20411e-10	6.83864	CyPs
CSE1L	1.3779	9.20841e-12	3.67962e-10	6.81836	CyPs
HNRNPD	0.861515	9.46693e-12	3.77195e-10	6.81438	CyPs
VIM	2.61259	1.01518e-11	4.03315e-10	6.80433	CyPs
CENPH	4.36728	1.1312e-11	4.46825e-10	6.78874	CyPs
TNIK	0.59988	1.44049e-11	5.67365e-10	6.75377	CyPs
RRM2	6.97692	1.50646e-11	5.91651e-10	6.74728	CyPs
IPO7	1.1469	1.51351e-11	5.92726e-10	6.7466	CyPs
TPR	0.95509	1.5617e-11	6.09863e-10	6.74205	CyPs
BICD1	0.755613	1.79347e-11	6.98388e-10	6.72192	CyPs
SRSF4	0.961222	1.82171e-11	7.07379e-10	6.71964	CyPs
OGN	3.49151	1.83735e-11	7.11441e-10	6.7184	CyPs
CGGBP1	0.977534	1.87825e-11	7.25239e-10	6.71519	CyPs
TUSC3	1.03382	2.06037e-11	7.93329e-10	6.70168	CyPs
DPF1	1.46277	2.0829e-11	7.99764e-10	6.70009	CyPs
SMC3	1.16395	2.12625e-11	8.14136e-10	6.69708	CyPs
AKAP12	0.873487	2.28687e-11	8.73202e-10	6.68643	CyPs
PNN	0.905206	2.42028e-11	9.21585e-10	6.67812	CyPs
MLH1	1.2401	2.89149e-11	1.09494e-09	6.65199	CyPs
STARD13	1.18483	2.9409e-11	1.11059e-09	6.6495	CyPs
RANBP9	0.92768	3.08779e-11	1.16287e-09	6.64232	CyPs
PRDM5	1.25981	3.45111e-11	1.29261e-09	6.62591	CyPs
PDS5A	0.796098	3.49033e-11	1.30375e-09	6.62424	CyPs
KLHL22	1.14574	3.51628e-11	1.30989e-09	6.62315	CyPs
STMN1	1.04529	3.55854e-11	1.32205e-09	6.62138	CyPs
HNRNPU	0.720183	3.70497e-11	1.36905e-09	6.61542	CyPs
NPAS3	0.363028	3.8638e-11	1.42391e-09	6.60921	CyPs
CKAP5	1.17807	3.93403e-11	1.44591e-09	6.60654	CyPs
C5orf34	3.816	4.03259e-11	1.47148e-09	6.60288	CyPs
SPATS2	0.887246	4.09587e-11	1.48554e-09	6.60057	CyPs
PRC1	4.58982	4.51297e-11	1.63251e-09	6.58618	CyPs
RHEB	1.20085	4.84363e-11	1.74752e-09	6.57566	CyPs
ESCO2	6.58954	5.60135e-11	2.01561e-09	6.55401	CyPs
STXBP5L	0.589617	5.97479e-11	2.14437e-09	6.54437	CyPs
KIF22	2.73771	6.07436e-11	2.17443e-09	6.5419	CyPs
NEDD1	1.78478	6.18851e-11	2.20382e-09	6.53911	CyPs
DERA	1.20353	7.22334e-11	2.56569e-09	6.51594	CyPs
SRGAP2	0.900396	8.03813e-11	2.84042e-09	6.49989	CyPs
RAD54L	4.8806	8.21358e-11	2.89497e-09	6.49664	CyPs
SCAPER	0.692149	8.71847e-11	3.06507e-09	6.48765	CyPs
KIF18B	2.39096	9.75701e-11	3.42142e-09	6.47067	CyPs
RFC1	1.06572	1.02933e-10	3.6003e-09	6.46258	CyPs
UBASH3B	1.10412	1.14517e-10	3.99531e-09	6.44643	CyPs
SRPK1	1.11384	1.29955e-10	4.49965e-09	6.42722	CyPs
CCDC150	3.87761	1.3059e-10	4.51029e-09	6.42648	CyPs
CTPS1	2.21315	1.31282e-10	4.52283e-09	6.42568	CyPs
STON2	1.97649	1.43448e-10	4.92959e-09	6.41219	CyPs
SUGP2	0.940091	1.49947e-10	5.13863e-09	6.40543	CyPs
NTNG1	0.680584	1.50279e-10	5.13863e-09	6.40509	CyPs
SPECC1	0.921747	1.67001e-10	5.68218e-09	6.38898	CyPs
DOT1L	1.71529	1.72289e-10	5.84763e-09	6.38421	CyPs
PTGES3	0.992803	1.82247e-10	6.1552e-09	6.3756	CyPs
DPYSL5	1.23529	1.92938e-10	6.50032e-09	6.36686	CyPs
PRIM1	2.13602	1.9454e-10	6.53825e-09	6.36559	CyPs
UBA2	0.974073	1.96743e-10	6.59618e-09	6.36386	CyPs
EFCAB11	1.58737	2.179e-10	7.28773e-09	6.34816	CyPs
ALMS1	0.888141	2.26653e-10	7.56208e-09	6.3421	CyPs
FNIP2	0.984656	2.28881e-10	7.61791e-09	6.34059	CyPs
ANKRD10	0.711355	2.34109e-10	7.77311e-09	6.33711	CyPs
LRPPRC	0.83268	2.53358e-10	8.37179e-09	6.32492	CyPs
FAT1	1.98317	2.75362e-10	9.07704e-09	6.31205	CyPs
TBC1D31	1.87689	2.78406e-10	9.15543e-09	6.31035	CyPs
RAD21	1.07942	3.08742e-10	1.01189e-08	6.29432	CyPs
NUP153	1.06895	3.09176e-10	1.01189e-08	6.29411	CyPs
EPS8	0.773762	3.46287e-10	1.12798e-08	6.2765	CyPs
DHCR24	1.39344	3.59167e-10	1.16716e-08	6.27081	CyPs
E2F7	6.93204	3.83693e-10	1.24392e-08	6.26052	CyPs
COA1	0.773256	3.86281e-10	1.24937e-08	6.25947	CyPs
EML4	0.861952	4.06118e-10	1.31045e-08	6.25166	CyPs
METRN	0.947131	4.13078e-10	1.32978e-08	6.249	CyPs
ANKRD26	0.789784	4.14795e-10	1.33219e-08	6.24836	CyPs
PLSCR1	1.69281	4.19182e-10	1.34314e-08	6.24671	CyPs
PLK4	5.18029	4.2805e-10	1.36837e-08	6.24344	CyPs
TIMELESS	4.47686	4.35625e-10	1.38666e-08	6.2407	CyPs
SCN8A	0.84699	4.35791e-10	1.38666e-08	6.24064	CyPs
RFX2	2.14444	4.55945e-10	1.44744e-08	6.23356	CyPs
GNG4	1.21443	4.72086e-10	1.49523e-08	6.22811	CyPs
NUP155	1.49297	5.17431e-10	1.63508e-08	6.21372	CyPs
ELOVL6	0.962028	5.26201e-10	1.65898e-08	6.21108	CyPs
TRIM37	1.01038	5.71497e-10	1.79767e-08	6.1981	CyPs
SP3	0.891775	5.78495e-10	1.81173e-08	6.19618	CyPs
ARL13B	1.22301	5.78605e-10	1.81173e-08	6.19615	CyPs
SND1	0.739536	5.96667e-10	1.86404e-08	6.19131	CyPs
DCLK2	0.688099	6.05723e-10	1.88804e-08	6.18893	CyPs
MAP4	0.794825	6.15217e-10	1.9133e-08	6.18648	CyPs
DDB2	2.22447	6.73574e-10	2.09006e-08	6.17217	CyPs
CLEC2D	1.27407	6.76988e-10	2.09592e-08	6.17137	CyPs
CCP110	1.25181	6.93136e-10	2.14109e-08	6.16765	CyPs
CNTRL	1.02994	6.97908e-10	2.151e-08	6.16656	CyPs
NEDD4	0.843055	7.38151e-10	2.26994e-08	6.15769	CyPs
TYMS	3.92381	8.0056e-10	2.45636e-08	6.14482	CyPs
PAM	0.736695	8.1342e-10	2.49026e-08	6.14229	CyPs
PGAP1	0.756146	8.61406e-10	2.62547e-08	6.13318	CyPs
ZNF736	1.04462	8.74098e-10	2.65826e-08	6.13085	CyPs
FHOD3	0.759019	8.85837e-10	2.68802e-08	6.12873	CyPs
DBF4	2.18523	9.73949e-10	2.94888e-08	6.11362	CyPs
ASPN	3.40156	9.97243e-10	3.01277e-08	6.10985	CyPs
CBFB	0.779628	1.05974e-09	3.19022e-08	6.10014	CyPs
VAV3	1.03657	1.06062e-09	3.19022e-08	6.10001	CyPs
ZNF726	2.98094	1.08064e-09	3.23628e-08	6.09702	CyPs
C2CD3	1.12834	1.09079e-09	3.25958e-08	6.09552	CyPs
INTS7	1.15684	1.12123e-09	3.34325e-08	6.09112	CyPs
LCLAT1	0.976045	1.12576e-09	3.3495e-08	6.09048	CyPs
L2HGDH	1.18988	1.25825e-09	3.73562e-08	6.07264	CyPs
JMJD1C	0.466314	1.33606e-09	3.95809e-08	6.063	CyPs
BAZ1B	0.918445	1.3956e-09	4.12558e-08	6.05599	CyPs
GALR1	0.807648	1.45014e-09	4.26845e-08	6.04981	CyPs
PDE3B	0.984977	1.48416e-09	4.35924e-08	6.04608	CyPs
DRAXIN	3.33006	1.51153e-09	4.43018e-08	6.04313	CyPs
S100PBP	0.91489	1.64777e-09	4.79877e-08	6.0292	CyPs
PRKD3	1.1644	1.73152e-09	5.03203e-08	6.02118	CyPs
POC1A	4.98509	1.74734e-09	5.0673e-08	6.01971	CyPs
DNAJC1	0.801286	1.76708e-09	5.11373e-08	6.01789	CyPs
RASAL2	0.748036	1.79485e-09	5.18319e-08	6.01536	CyPs
SLC4A8	1.33338	1.79998e-09	5.18711e-08	6.0149	CyPs
MSH6	1.45852	1.82477e-09	5.24756e-08	6.01268	CyPs
PHTF1	1.32397	1.84382e-09	5.29126e-08	6.011	CyPs
SCARA3	2.08395	1.8638e-09	5.33745e-08	6.00925	CyPs
MED12L	0.726567	1.96389e-09	5.61241e-08	6.00077	CyPs
ARL4C	1.48568	1.98993e-09	5.67501e-08	5.99863	CyPs
DEPDC1B	5.05864	2.06273e-09	5.85833e-08	5.99279	CyPs
LPP	0.537677	2.07459e-09	5.87986e-08	5.99186	CyPs
ZC3H12C	0.879968	2.15241e-09	6.08786e-08	5.98587	CyPs
TMEM245	0.801946	2.47406e-09	6.98326e-08	5.96316	CyPs
RFC2	2.71672	2.52528e-09	7.11322e-08	5.95981	CyPs
FDPS	0.96457	2.59063e-09	7.2675e-08	5.95564	CyPs
CENPQ	2.34615	2.68475e-09	7.51621e-08	5.9498	CyPs
STK4	1.03998	2.8588e-09	7.97101e-08	5.93951	CyPs
TFDP1	1.58078	2.96591e-09	8.25292e-08	5.93347	CyPs
SRSF2	1.01925	2.98817e-09	8.29806e-08	5.93225	CyPs
GAS2L3	3.56786	3.24549e-09	8.99445e-08	5.91867	CyPs
MYH10	0.772463	3.26811e-09	9.03891e-08	5.91753	CyPs
COL8A1	1.27821	3.34288e-09	9.22715e-08	5.91381	CyPs
RECQL	1.95034	3.44479e-09	9.48939e-08	5.90886	CyPs
MKI67	9.12644	3.50524e-09	9.6366e-08	5.906	CyPs
TTK	7.50101	3.98983e-09	1.0947e-07	5.88461	CyPs
ATP1B3	0.935749	4.04729e-09	1.10825e-07	5.88225	CyPs
MET	2.18836	4.24507e-09	1.15779e-07	5.87435	CyPs
CLOCK	0.788557	4.30978e-09	1.17311e-07	5.87184	CyPs
OSBPL6	0.749448	4.60149e-09	1.25004e-07	5.86098	CyPs
MAPK1IP1L	0.977108	4.75293e-09	1.28863e-07	5.8556	CyPs
PPM1D	1.24004	4.77406e-09	1.29182e-07	5.85486	CyPs
DPY19L2	0.719495	4.90637e-09	1.32501e-07	5.85032	CyPs
PCBD2	1.30806	4.95012e-09	1.3342e-07	5.84884	CyPs
DTYMK	2.25085	4.96773e-09	1.33633e-07	5.84825	CyPs
MTF2	0.761705	4.99144e-09	1.34008e-07	5.84746	CyPs
CDH2	0.68058	5.49923e-09	1.47067e-07	5.83132	CyPs
PDE7A	0.759292	5.89423e-09	1.57019e-07	5.81973	CyPs
PLCB1	0.443655	5.98476e-09	1.58816e-07	5.81718	CyPs
CHSY3	1.22494	6.31193e-09	1.67175e-07	5.80828	CyPs
CEP57	0.883294	6.53462e-09	1.7274e-07	5.80247	CyPs
CENPO	3.25629	7.18578e-09	1.89589e-07	5.78652	CyPs
PTPN12	0.711394	7.53998e-09	1.98553e-07	5.77843	CyPs
NSUN6	0.817361	7.55611e-09	1.98597e-07	5.77807	CyPs
FOXJ3	0.676158	7.77661e-09	2.04002e-07	5.77323	CyPs
PGM2L1	1.61811	8.29667e-09	2.17231e-07	5.76232	CyPs
ENOSF1	0.903509	8.45622e-09	2.20987e-07	5.7591	CyPs
FILIP1L	0.976989	8.88616e-09	2.30906e-07	5.75072	CyPs
SASS6	2.23114	9.70173e-09	2.51623e-07	5.73586	CyPs
REEP1	1.03308	1.00976e-08	2.61398e-07	5.72908	CyPs
YEATS2	0.750089	1.02942e-08	2.65986e-07	5.72581	CyPs
CLIC4	0.813983	1.09601e-08	2.82661e-07	5.71516	CyPs
NUDT21	1.2184	1.1721e-08	3.01152e-07	5.70374	CyPs
NOS1AP	0.802314	1.18537e-08	3.03994e-07	5.70182	CyPs
C18orf54	2.38598	1.22815e-08	3.14055e-07	5.69577	CyPs
STARD9	1.16037	1.26322e-08	3.22157e-07	5.69097	CyPs
FNDC3B	0.668691	1.27056e-08	3.23429e-07	5.68998	CyPs
SENP1	1.17302	1.27736e-08	3.24559e-07	5.68907	CyPs
CAMK1D	0.738558	1.32517e-08	3.36084e-07	5.68279	CyPs
MT2A	0.95852	1.36334e-08	3.44493e-07	5.67793	CyPs
NVL	0.913814	1.51714e-08	3.81953e-07	5.65961	CyPs
UTRN	1.30952	1.5274e-08	3.83832e-07	5.65846	CyPs
CEP97	0.761512	1.53093e-08	3.84016e-07	5.65806	CyPs
TONSL	4.48417	1.55494e-08	3.89329e-07	5.65539	CyPs
SHCBP1	4.63056	1.60919e-08	4.02181e-07	5.6495	CyPs
SMARCC1	0.651416	1.64713e-08	4.10783e-07	5.64549	CyPs
ZNF714	1.03918	1.64959e-08	4.10783e-07	5.64523	CyPs
INPP5F	0.71989	1.70646e-08	4.24176e-07	5.6394	CyPs
IQGAP2	2.78511	1.71055e-08	4.24425e-07	5.63899	CyPs
PKM	0.814516	1.71884e-08	4.25716e-07	5.63815	CyPs
NUP85	1.54946	1.77221e-08	4.37357e-07	5.63288	CyPs
TIAM1	0.628682	1.77992e-08	4.38473e-07	5.63213	CyPs
NPTX2	2.16536	1.81529e-08	4.46386e-07	5.62874	CyPs
ZNF682	1.31228	1.82927e-08	4.4902e-07	5.62742	CyPs
AGTPBP1	0.732043	1.88786e-08	4.60932e-07	5.62198	CyPs
ZNF721	0.686932	1.94139e-08	4.73162e-07	5.61714	CyPs
NSRP1	0.727489	1.99981e-08	4.86537e-07	5.61202	CyPs
ATL3	1.42821	2.03844e-08	4.95059e-07	5.60871	CyPs
POT1	0.954759	2.06159e-08	4.998e-07	5.60675	CyPs
SFMBT1	1.00852	2.0659e-08	4.99963e-07	5.60639	CyPs
HIF1A	0.760313	2.10923e-08	5.0955e-07	5.6028	CyPs
HUNK	1.36323	2.1701e-08	5.23337e-07	5.59786	CyPs
RAD54B	2.50934	2.28213e-08	5.48429e-07	5.58913	CyPs
RAB3IP	0.643362	2.30083e-08	5.51957e-07	5.58771	CyPs
CKAP2L	7.41101	2.46136e-08	5.8944e-07	5.57598	CyPs
MGME1	1.49972	2.50328e-08	5.98436e-07	5.57304	CyPs
FAM184A	0.768573	2.56874e-08	6.11956e-07	5.56855	CyPs
SEMA3E	0.708014	2.58309e-08	6.1431e-07	5.56757	CyPs
ESR2	1.75831	2.63043e-08	6.24489e-07	5.56441	CyPs
TRA2B	0.726727	2.97088e-08	7.01918e-07	5.54314	CyPs
PPHLN1	0.729904	3.25036e-08	7.66372e-07	5.52739	CyPs
DNM1	0.783694	3.27283e-08	7.70348e-07	5.52618	CyPs
FOCAD	0.664653	3.70196e-08	8.61034e-07	5.50451	CyPs
BTG3	1.24827	3.77354e-08	8.762e-07	5.50114	CyPs
CTNNAL1	1.40092	3.89195e-08	9.00652e-07	5.49569	CyPs
TACC1	0.799133	4.07625e-08	9.40136e-07	5.48752	CyPs
CDK1	7.79244	4.24481e-08	9.77373e-07	5.48035	CyPs
PCNT	1.13323	4.2706e-08	9.81666e-07	5.47928	CyPs
CNOT2	0.678552	4.32028e-08	9.91428e-07	5.47723	CyPs
PSIP1	0.769355	4.34145e-08	9.94626e-07	5.47637	CyPs
ST8SIA5	0.908512	4.44734e-08	1.01566e-06	5.4721	CyPs
RDX	0.625018	4.44803e-08	1.01566e-06	5.47207	CyPs
NUP54	0.990592	5.14424e-08	1.17074e-06	5.44625	CyPs
ASRGL1	1.27576	5.63514e-08	1.27779e-06	5.43001	CyPs
CHCHD3	0.625666	5.64252e-08	1.27779e-06	5.42977	CyPs
ATP13A3	0.771444	5.67679e-08	1.28344e-06	5.42869	CyPs
CALU	1.05732	6.1728e-08	1.39329e-06	5.41372	CyPs
PRKD1	0.57051	6.58536e-08	1.48397e-06	5.40213	CyPs
PDGFC	0.679274	6.83424e-08	1.53336e-06	5.39548	CyPs
ELL2	1.04309	6.8379e-08	1.53336e-06	5.39538	CyPs
CKAP2	2.4277	6.83799e-08	1.53336e-06	5.39538	CyPs
ZNF90	3.12178	7.00501e-08	1.56825e-06	5.39104	CyPs
NFE2L2	0.69629	7.13507e-08	1.59477e-06	5.38774	CyPs
TMEM116	1.81633	7.16931e-08	1.59983e-06	5.38688	CyPs
CTSC	1.52588	7.74423e-08	1.72253e-06	5.37299	CyPs
P4HB	1.07033	7.93345e-08	1.76176e-06	5.36864	CyPs
ARHGAP32	0.568519	8.42955e-08	1.86628e-06	5.35768	CyPs
HS2ST1	0.836246	8.43126e-08	1.86628e-06	5.35765	CyPs
NETO2	0.807436	8.52274e-08	1.8835e-06	5.3557	CyPs
KIF2A	0.662868	8.63397e-08	1.90502e-06	5.35335	CyPs
ANKLE2	1.12793	8.64961e-08	1.90541e-06	5.35302	CyPs
PSD3	0.477797	8.90953e-08	1.95953e-06	5.34767	CyPs
MTHFD1	1.24906	9.10056e-08	1.99834e-06	5.34382	CyPs
ATRNL1	0.359572	9.16554e-08	2.0094e-06	5.34254	CyPs
GBE1	0.956574	9.25081e-08	2.02487e-06	5.34086	CyPs
PABPC1	0.782213	9.33768e-08	2.04063e-06	5.33916	CyPs
CCDC7	0.721298	9.62414e-08	2.0999e-06	5.33368	CyPs
CSTF3	0.688193	1.02818e-07	2.23983e-06	5.32167	CyPs
ALK	0.631164	1.03886e-07	2.25952e-06	5.31979	CyPs
SF3B3	0.931803	1.12849e-07	2.43904e-06	5.30471	CyPs
ANP32B	1.50173	1.18397e-07	2.55091e-06	5.29595	CyPs
DZIP1L	1.66909	1.19625e-07	2.57335e-06	5.29407	CyPs
SKA3	5.71562	1.21362e-07	2.60257e-06	5.29143	CyPs
ZNF680	0.794589	1.25311e-07	2.68122e-06	5.28557	CyPs
SETBP1	0.637381	1.2542e-07	2.68122e-06	5.28541	CyPs
YBX1	0.899454	1.26264e-07	2.69507e-06	5.28419	CyPs
POLH	1.63411	1.28823e-07	2.74118e-06	5.28051	CyPs
GAS7	1.27101	1.40786e-07	2.98974e-06	5.26422	CyPs
SLC7A1	1.10788	1.40939e-07	2.98974e-06	5.26402	CyPs
RPRD1B	0.909016	1.56318e-07	3.30569e-06	5.24496	CyPs
SRBD1	0.903325	1.56555e-07	3.30569e-06	5.24468	CyPs
GDI2	0.77231	1.58192e-07	3.33514e-06	5.24276	CyPs
BMP2K	0.858835	1.63886e-07	3.44988e-06	5.23623	CyPs
PBX3	0.769054	1.6622e-07	3.49367e-06	5.23362	CyPs
GSE1	1.18326	1.66478e-07	3.49375e-06	5.23334	CyPs
NET1	1.72864	1.70399e-07	3.57058e-06	5.22903	CyPs
PHF19	1.81775	1.73498e-07	3.62999e-06	5.2257	CyPs
PTPDC1	1.05998	1.76553e-07	3.68384e-06	5.22247	CyPs
ATG10	0.771586	1.76608e-07	3.68384e-06	5.22241	CyPs
CDK14	0.502013	1.77032e-07	3.6871e-06	5.22197	CyPs
HRH1	2.30926	1.7906e-07	3.72368e-06	5.21986	CyPs
VOPP1	1.1753	1.89451e-07	3.91903e-06	5.2094	CyPs
CAV3	1.74403	1.89877e-07	3.91903e-06	5.20898	CyPs
BRD4	0.708328	1.89879e-07	3.91903e-06	5.20898	CyPs
CSMD2	0.474911	1.93996e-07	3.998e-06	5.205	CyPs
DPY19L1	0.992536	1.97302e-07	4.06005e-06	5.20186	CyPs
NSL1	0.776528	2.02891e-07	4.16358e-06	5.19667	CyPs
FNTB	1.15737	2.02939e-07	4.16358e-06	5.19663	CyPs
BCAT1	0.705679	2.07168e-07	4.23385e-06	5.19279	CyPs
CDCA8	5.5677	2.07288e-07	4.23385e-06	5.19268	CyPs
IQCB1	0.81026	2.07804e-07	4.23809e-06	5.19222	CyPs
FBXL7	0.623279	2.08837e-07	4.25284e-06	5.19129	CyPs
LRCH1	0.784716	2.09351e-07	4.25701e-06	5.19084	CyPs
CLN6	2.30007	2.12622e-07	4.31714e-06	5.18795	CyPs
NNT	0.741457	2.25377e-07	4.56263e-06	5.17709	CyPs
DONSON	1.84596	2.30252e-07	4.65447e-06	5.17309	CyPs
CERS6	0.622835	2.39863e-07	4.84163e-06	5.16545	CyPs
EIF3A	0.759213	2.46712e-07	4.97259e-06	5.16018	CyPs
HMGN1	0.697179	2.47801e-07	4.98722e-06	5.15936	CyPs
TBC1D5	0.489775	2.5001e-07	5.02433e-06	5.15769	CyPs
TLK1	0.668008	2.51248e-07	5.04183e-06	5.15677	CyPs
SORL1	0.667691	2.63962e-07	5.28924e-06	5.14751	CyPs
CIT	0.67604	2.69013e-07	5.37479e-06	5.14396	CyPs
PPP5C	1.00984	2.76002e-07	5.50641e-06	5.13914	CyPs
SLBP	1.87678	2.77708e-07	5.53243e-06	5.13798	CyPs
CDC25C	5.21252	2.82766e-07	5.62503e-06	5.13459	CyPs
EIF2AK2	0.714947	2.88564e-07	5.73208e-06	5.13077	CyPs
HAUS1	1.82266	3.11548e-07	6.15308e-06	5.11632	CyPs
SEC11A	0.979466	3.15599e-07	6.22414e-06	5.11388	CyPs
SNX24	0.86551	3.18043e-07	6.26335e-06	5.11243	CyPs
KMT2A	0.619481	3.34992e-07	6.58769e-06	5.10262	CyPs
KIAA0586	0.750993	3.56637e-07	6.99334e-06	5.09076	CyPs
DYRK1A	0.593147	3.59899e-07	7.04725e-06	5.08903	CyPs
CDC6	5.40285	3.6743e-07	7.18448e-06	5.0851	CyPs
RELL1	0.911232	3.68317e-07	7.1916e-06	5.08464	CyPs
GPR107	0.823266	3.71879e-07	7.25085e-06	5.08282	CyPs
MIB1	0.576832	3.97771e-07	7.7447e-06	5.07002	CyPs
ACADM	0.861772	4.09712e-07	7.95802e-06	5.06439	CyPs
PHF20	0.857843	4.09885e-07	7.95802e-06	5.06431	CyPs
SFXN5	1.02417	4.18573e-07	8.11443e-06	5.06031	CyPs
ATG16L2	1.07784	4.19121e-07	8.11443e-06	5.06006	CyPs
TAF1B	0.982645	4.21954e-07	8.14632e-06	5.05878	CyPs
USP31	1.09791	4.35639e-07	8.39441e-06	5.05269	CyPs
KIAA1549L	0.943101	4.36026e-07	8.39441e-06	5.05252	CyPs
VKORC1L1	0.95466	4.39701e-07	8.45332e-06	5.05091	CyPs
ORC3	0.817355	4.58484e-07	8.80213e-06	5.04292	CyPs
KIF23	6.37621	4.7404e-07	9.08809e-06	5.03653	CyPs
STAG1	0.552685	4.83661e-07	9.25961e-06	5.03268	CyPs
TANC1	0.522088	4.8494e-07	9.27118e-06	5.03218	CyPs
OXCT1	0.752858	5.00493e-07	9.55525e-06	5.02612	CyPs
NUP214	0.751446	5.06911e-07	9.66436e-06	5.02368	CyPs
OLA1	0.633788	5.09973e-07	9.70927e-06	5.02252	CyPs
TRPM7	0.623324	5.11716e-07	9.72897e-06	5.02187	CyPs
MAN2A1	0.817064	5.13317e-07	9.74593e-06	5.02127	CyPs
CARD8	1.17421	5.17162e-07	9.80539e-06	5.01983	CyPs
ZNF431	0.755141	5.31415e-07	1.00617e-05	5.01461	CyPs
MAPKAP1	0.630451	5.45961e-07	1.0323e-05	5.00941	CyPs
PBRM1	0.626901	5.56119e-07	1.04862e-05	5.00586	CyPs
SLC4A7	0.799359	5.75908e-07	1.08444e-05	4.99913	CyPs
TPST1	0.627985	6.09634e-07	1.14481e-05	4.98814	CyPs
USP6NL	0.723101	6.26268e-07	1.17444e-05	4.98294	CyPs
CSGALNACT2	0.709189	6.27953e-07	1.176e-05	4.98242	CyPs
TASP1	0.816237	6.35985e-07	1.18942e-05	4.97996	CyPs
CDKN2A	1.77672	6.38284e-07	1.1921e-05	4.97926	CyPs
NHLRC2	0.689648	6.54857e-07	1.22139e-05	4.97429	CyPs
BUB3	1.35464	6.77093e-07	1.26115e-05	4.96782	CyPs
DCP2	0.956684	6.78869e-07	1.26175e-05	4.96731	CyPs
DIAPH1	1.02785	6.79246e-07	1.26175e-05	4.96721	CyPs
ANKMY1	1.10652	7.00435e-07	1.29935e-05	4.96124	CyPs
IPO5	0.907249	7.08698e-07	1.31114e-05	4.95896	CyPs
HAUS8	3.13108	7.24312e-07	1.33822e-05	4.95473	CyPs
ZNRF3	0.764262	7.36564e-07	1.35904e-05	4.95147	CyPs
YWHAQ	0.742151	7.43285e-07	1.3696e-05	4.9497	CyPs
NUP88	0.835907	7.47986e-07	1.37642e-05	4.94847	CyPs
G2E3	0.803286	7.7266e-07	1.41802e-05	4.94215	CyPs
EXOSC8	1.20737	7.75014e-07	1.42045e-05	4.94156	CyPs
PMS1	0.612426	7.90658e-07	1.44671e-05	4.93766	CyPs
CUX1	0.577917	7.91447e-07	1.44671e-05	4.93746	CyPs
CENPM	6.21117	8.04348e-07	1.46639e-05	4.93431	CyPs
RNGTT	0.630023	8.28961e-07	1.50926e-05	4.92842	CyPs
SPECC1L	0.758061	8.38935e-07	1.5254e-05	4.92608	CyPs
SYTL2	0.956373	8.4833e-07	1.54044e-05	4.92391	CyPs
UBE2T	4.64332	8.5266e-07	1.54626e-05	4.92291	CyPs
RPA2	1.68031	8.91721e-07	1.61284e-05	4.91414	CyPs
RCOR1	0.883345	8.96935e-07	1.62014e-05	4.913	CyPs
DAP3	0.872729	9.11988e-07	1.64517e-05	4.90974	CyPs
ZWINT	5.72542	9.16963e-07	1.65198e-05	4.90867	CyPs
ARHGAP24	1.3568	9.20781e-07	1.65668e-05	4.90785	CyPs
RNF157	0.607981	9.24119e-07	1.66051e-05	4.90714	CyPs
MEF2A	0.578005	9.4783e-07	1.7009e-05	4.90217	CyPs
SLC38A9	0.760709	9.62851e-07	1.7256e-05	4.89908	CyPs
OSMR	0.963577	1.00692e-06	1.80223e-05	4.89028	CyPs
UBE2D2	0.708509	1.02265e-06	1.82801e-05	4.88723	CyPs
RIC8B	0.687572	1.05034e-06	1.87506e-05	4.88197	CyPs
TTL	0.890812	1.05508e-06	1.88108e-05	4.88108	CyPs
OSBP2	0.801725	1.05749e-06	1.88293e-05	4.88063	CyPs
NUCB2	1.10682	1.09678e-06	1.94911e-05	4.87343	CyPs
SLC36A4	0.750711	1.09749e-06	1.94911e-05	4.8733	CyPs
SMYD4	1.75468	1.1635e-06	2.06102e-05	4.86175	CyPs
MATN2	0.611224	1.21414e-06	2.14794e-05	4.85332	CyPs
GTPBP2	1.57105	1.22169e-06	2.15853e-05	4.85209	CyPs
PCBP2	0.653165	1.26202e-06	2.22692e-05	4.84564	CyPs
WASF3	0.66788	1.27047e-06	2.23801e-05	4.84432	CyPs
REV1	0.625583	1.27156e-06	2.23801e-05	4.84415	CyPs
GFPT1	0.765699	1.28525e-06	2.25921e-05	4.84202	CyPs
NCAPD2	2.0756	1.2975e-06	2.27783e-05	4.84014	CyPs
ZNRF2	0.944785	1.3264e-06	2.3256e-05	4.83576	CyPs
FAM193A	0.639778	1.3355e-06	2.33857e-05	4.8344	CyPs
NUP160	0.631434	1.34863e-06	2.35855e-05	4.83245	CyPs
FBN3	1.12413	1.36196e-06	2.37884e-05	4.83049	CyPs
CRLF3	0.682577	1.38539e-06	2.4167e-05	4.8271	CyPs
ORC5	0.939835	1.42865e-06	2.489e-05	4.82097	CyPs
VAPB	0.826911	1.432e-06	2.49004e-05	4.8205	CyPs
FBXO22	0.822484	1.43287e-06	2.49004e-05	4.82038	CyPs
PMP2	0.652435	1.44856e-06	2.51413e-05	4.8182	CyPs
IMMT	0.75416	1.45609e-06	2.52402e-05	4.81717	CyPs
ATG7	0.618316	1.48078e-06	2.56357e-05	4.81381	CyPs
SESTD1	0.583958	1.49438e-06	2.58387e-05	4.81199	CyPs
ELF2	0.588901	1.50228e-06	2.59427e-05	4.81093	CyPs
CCM2	0.920474	1.57576e-06	2.71434e-05	4.80138	CyPs
IQGAP1	1.29503	1.61355e-06	2.77595e-05	4.79663	CyPs
DTNBP1	0.931352	1.64492e-06	2.82639e-05	4.79277	CyPs
FARSB	0.78197	1.65863e-06	2.84638e-05	4.79111	CyPs
NT5C3A	0.760899	1.7174e-06	2.9399e-05	4.78412	CyPs
NFIB	0.382808	1.73736e-06	2.97037e-05	4.7818	CyPs
FAR1	0.613038	1.75814e-06	2.99936e-05	4.77941	CyPs
SSBP2	0.588752	1.75868e-06	2.99936e-05	4.77934	CyPs
GART	0.89211	1.76159e-06	3.0006e-05	4.77901	CyPs
JUN	0.884706	1.77274e-06	3.01212e-05	4.77774	CyPs
IFT122	1.20146	1.80765e-06	3.06635e-05	4.77382	CyPs
CHEK2	3.91876	1.80911e-06	3.06635e-05	4.77366	CyPs
EFHC1	0.89172	1.82945e-06	3.097e-05	4.77141	CyPs
CCDC82	0.703788	1.84386e-06	3.11414e-05	4.76983	CyPs
CNOT1	0.664874	1.86968e-06	3.15345e-05	4.76702	CyPs
DGCR8	1.26236	1.89057e-06	3.18477e-05	4.76478	CyPs
TPM4	1.12911	1.90632e-06	3.20738e-05	4.76311	CyPs
SLC25A40	0.955376	1.94411e-06	3.26298e-05	4.75915	CyPs
GPATCH2	0.742284	1.9778e-06	3.31547e-05	4.75568	CyPs
DYM	0.536334	1.9864e-06	3.32583e-05	4.7548	CyPs
RAD51C	1.17705	2.04041e-06	3.41209e-05	4.74938	CyPs
MOXD1	1.3601	2.1464e-06	3.58499e-05	4.73913	CyPs
TNPO3	0.730358	2.16804e-06	3.61674e-05	4.73709	CyPs
FAR2	0.794652	2.17879e-06	3.63027e-05	4.73609	CyPs
SLC24A2	0.555765	2.23118e-06	3.71305e-05	4.73127	CyPs
GRM5	0.389531	2.23624e-06	3.71698e-05	4.73081	CyPs
TPGS2	1.0345	2.25972e-06	3.75146e-05	4.72869	CyPs
CAPRIN1	0.710478	2.27801e-06	3.77726e-05	4.72705	CyPs
TDP1	1.73684	2.28441e-06	3.78331e-05	4.72648	CyPs
CCDC66	0.591005	2.31389e-06	3.82753e-05	4.72388	CyPs
HNRNPUL1	0.931649	2.3184e-06	3.83038e-05	4.72348	CyPs
MYEF2	0.582148	2.37118e-06	3.91287e-05	4.7189	CyPs
FAM149B1	0.911079	2.38549e-06	3.92777e-05	4.71768	CyPs
RPLP1	0.690696	2.38592e-06	3.92777e-05	4.71764	CyPs
TRIM26	1.11914	2.50081e-06	4.10707e-05	4.70806	CyPs
SMG1	0.593737	2.52179e-06	4.13658e-05	4.70636	CyPs
HMMR	5.70176	2.55544e-06	4.1818e-05	4.70366	CyPs
USP1	1.58397	2.62298e-06	4.28697e-05	4.69833	CyPs
CHAF1B	4.01383	2.62595e-06	4.28697e-05	4.6981	CyPs
MYBL2	5.64761	2.6517e-06	4.31563e-05	4.6961	CyPs
KLHL42	0.624166	2.66248e-06	4.32605e-05	4.69528	CyPs
LIMK2	2.35367	2.79358e-06	4.53371e-05	4.68544	CyPs
TRIOBP	1.35639	2.87262e-06	4.65648e-05	4.67972	CyPs
HJURP	8.11141	2.906e-06	4.70506e-05	4.67735	CyPs
MCM2	5.30046	2.92602e-06	4.73189e-05	4.67595	CyPs
ACTN1	1.57803	2.96175e-06	4.78405e-05	4.67345	CyPs
UGP2	0.798414	2.98972e-06	4.82356e-05	4.67152	CyPs
TULP3	1.09081	3.02927e-06	4.88164e-05	4.66883	CyPs
PPCDC	1.00025	3.12539e-06	5.03064e-05	4.6624	CyPs
SLCO3A1	1.11519	3.12999e-06	5.03214e-05	4.6621	CyPs
LIMS1	0.665835	3.15387e-06	5.06196e-05	4.66054	CyPs
SLC8A1	0.459316	3.1559e-06	5.06196e-05	4.6604	CyPs
CCDC171	0.664835	3.17636e-06	5.08884e-05	4.65907	CyPs
USP49	0.739658	3.20656e-06	5.12528e-05	4.65712	CyPs
PACS1	0.593952	3.24644e-06	5.18299e-05	4.65458	CyPs
SREK1	0.572823	3.35503e-06	5.35015e-05	4.64779	CyPs
TULP4	0.622602	3.37015e-06	5.36802e-05	4.64687	CyPs
ULK4	0.934954	3.39495e-06	5.40127e-05	4.64535	CyPs
RASA2	0.579886	3.40102e-06	5.40467e-05	4.64498	CyPs
PAXIP1	1.03274	3.45043e-06	5.47686e-05	4.64201	CyPs
PHACTR4	0.58411	3.49538e-06	5.54181e-05	4.63933	CyPs
PGP	1.15484	3.63551e-06	5.75072e-05	4.6312	CyPs
GPHN	0.395093	3.74499e-06	5.91708e-05	4.62506	CyPs
STT3B	0.62827	3.76635e-06	5.944e-05	4.62388	CyPs
ITGB1	0.68953	3.78712e-06	5.96992e-05	4.62274	CyPs
FBXL5	0.589283	3.84686e-06	6.05343e-05	4.61949	CyPs
PARP4	0.913386	3.8489e-06	6.05343e-05	4.61938	CyPs
LMO7	1.26721	3.89568e-06	6.11999e-05	4.61687	CyPs
MSRB3	0.843592	3.94178e-06	6.18535e-05	4.61443	CyPs
CFDP1	0.636362	4.0899e-06	6.41047e-05	4.60676	CyPs
MCPH1	0.625914	4.14887e-06	6.49549e-05	4.60378	CyPs
TMTC2	0.843877	4.16675e-06	6.51606e-05	4.60289	CyPs
RUFY2	0.601359	4.2056e-06	6.56874e-05	4.60095	CyPs
GLMN	0.673795	4.26682e-06	6.64986e-05	4.59794	CyPs
GGH	2.41457	4.32752e-06	6.7292e-05	4.595	CyPs
ARMC1	1.06974	4.34328e-06	6.74607e-05	4.59424	CyPs
SVIL	0.952125	4.44341e-06	6.8938e-05	4.58949	CyPs
PSMD1	0.590839	4.50789e-06	6.98597e-05	4.58648	CyPs
TMEM237	1.25749	4.51714e-06	6.99242e-05	4.58605	CyPs
SMC6	0.626059	4.56667e-06	7.06113e-05	4.58377	CyPs
NUP98	0.773318	4.59945e-06	7.10382e-05	4.58227	CyPs
CEP89	1.22855	4.8916e-06	7.54657e-05	4.56938	CyPs
SATB2	1.44691	4.97467e-06	7.66612e-05	4.56585	CyPs
THRAP3	0.640243	5.07528e-06	7.81241e-05	4.56165	CyPs
STIM1	0.655128	5.14925e-06	7.91741e-05	4.55861	CyPs
PPIG	0.636399	5.17525e-06	7.94848e-05	4.55756	CyPs
MBD2	0.736475	5.3018e-06	8.13377e-05	4.55248	CyPs
ASXL1	0.586571	5.4237e-06	8.3115e-05	4.54769	CyPs
PLEKHA7	1.83882	5.63667e-06	8.61865e-05	4.53958	CyPs
DEPDC1	6.14578	5.85502e-06	8.94257e-05	4.53156	CyPs
R3HDM2	0.534271	5.86271e-06	8.94437e-05	4.53128	CyPs
TMEM97	1.9478	5.87766e-06	8.95724e-05	4.53074	CyPs
RAI14	0.907839	6.02817e-06	9.17643e-05	4.5254	CyPs
MAT2A	0.717653	6.17561e-06	9.39048e-05	4.52029	CyPs
DENND2A	0.566757	6.1853e-06	9.39483e-05	4.51995	CyPs
XRCC4	0.751066	6.21534e-06	9.43004e-05	4.51893	CyPs
UBE2N	0.662747	6.26859e-06	9.50033e-05	4.51712	CyPs
EXOC5	0.670736	6.364e-06	9.63235e-05	4.51392	CyPs
CELF1	0.555617	6.36971e-06	9.63235e-05	4.51373	CyPs
SLC30A7	0.674424	6.46666e-06	9.76822e-05	4.51053	CyPs
HDAC2	0.81449	6.72073e-06	0.000101409	4.50235	CyPs
PAK1	0.742133	6.74482e-06	0.00010166	4.50159	CyPs
METTL15	0.556765	6.78279e-06	0.000102121	4.50039	CyPs
SYNDIG1	0.857502	6.88471e-06	0.000103542	4.49722	CyPs
HADH	1.27736	6.91605e-06	0.0001039	4.49626	CyPs
GON4L	0.692827	7.14469e-06	0.000107217	4.48933	CyPs
LYST	0.568058	7.16361e-06	0.000107384	4.48877	CyPs
SCN7A	1.05449	7.22871e-06	0.000108124	4.48684	CyPs
NAA25	0.606092	7.24854e-06	0.000108303	4.48626	CyPs
UBAP2	0.652753	7.34113e-06	0.000109567	4.48355	CyPs
PA2G4	1.31986	7.74918e-06	0.000115407	4.472	CyPs
CERS5	0.688731	7.79663e-06	0.000115987	4.47069	CyPs
SNX5	0.997059	7.96778e-06	0.000118405	4.46605	CyPs
UBA6	0.561168	8.06732e-06	0.000119755	4.46339	CyPs
C5	1.29992	8.36437e-06	0.000124031	4.45564	CyPs
LRR1	3.36454	8.42996e-06	0.000124869	4.45396	CyPs
NT5DC3	0.806005	8.55561e-06	0.000126594	4.45079	CyPs
NHLRC3	0.808938	8.59575e-06	0.000126991	4.44978	CyPs
SSX2IP	1.17409	8.60097e-06	0.000126991	4.44965	CyPs
TSPAN5	0.654834	8.61024e-06	0.000126992	4.44942	CyPs
VPS45	0.545782	8.7926e-06	0.000129542	4.44492	CyPs
MCMBP	0.928551	8.87207e-06	0.000130573	4.44298	CyPs
ACSS3	1.28264	8.96224e-06	0.000131759	4.44081	CyPs
PAICS	1.10891	9.36917e-06	0.000137448	4.43124	CyPs
MBNL1	0.487353	9.44829e-06	0.000138461	4.42943	CyPs
KHDRBS1	0.672374	9.49041e-06	0.00013893	4.42847	CyPs
DCLRE1C	1.02337	9.60092e-06	0.000140398	4.42597	CyPs
GANAB	0.929475	9.6157e-06	0.000140465	4.42564	CyPs
LTBP1	0.745791	9.72976e-06	0.00014198	4.42309	CyPs
SRPK2	0.503993	9.8094e-06	0.0001429	4.42133	CyPs
FIGNL1	2.12231	9.81356e-06	0.0001429	4.42124	CyPs
STIM2	0.540679	9.87312e-06	0.000143615	4.41993	CyPs
MAP3K3	0.770485	1.00188e-05	0.000145305	4.41677	CyPs
FUBP3	0.639435	1.0021e-05	0.000145305	4.41672	CyPs
STAU1	0.736633	1.04431e-05	0.00015126	4.40779	CyPs
IL1RAP	0.556823	1.04537e-05	0.00015126	4.40757	CyPs
GATAD2A	1.17237	1.06628e-05	0.000154123	4.40328	CyPs
PTN	0.448356	1.07933e-05	0.000155845	4.40064	CyPs
CDKN2C	2.76327	1.10405e-05	0.00015908	4.39572	CyPs
KLHL2	0.769454	1.12723e-05	0.000162081	4.39121	CyPs
NFATC3	0.672206	1.1412e-05	0.000163918	4.38853	CyPs
SKP2	1.388	1.15695e-05	0.000166006	4.38555	CyPs
CACNA1A	0.404842	1.16985e-05	0.000167683	4.38313	CyPs
SRRT	1.09838	1.17237e-05	0.000167718	4.38266	CyPs
NPHP4	1.20557	1.17254e-05	0.000167718	4.38263	CyPs
ZC3H14	0.551624	1.18245e-05	0.00016896	4.3808	CyPs
GABBR2	1.21994	1.18972e-05	0.000169822	4.37946	CyPs
HNRNPA3	0.556477	1.19994e-05	0.000171103	4.3776	CyPs
MXD3	4.05611	1.2345e-05	0.000175849	4.3714	CyPs
NUP93	1.10769	1.23908e-05	0.000176319	4.3706	CyPs
OGDH	0.741226	1.24558e-05	0.000177061	4.36945	CyPs
IGFBP3	2.49386	1.24796e-05	0.000177216	4.36904	CyPs
CD2AP	0.89523	1.2534e-05	0.000177804	4.36809	CyPs
TCF12	0.341386	1.28588e-05	0.000181849	4.36249	CyPs
EIF4E	0.67089	1.30918e-05	0.000184953	4.35857	CyPs
ARRDC4	0.967089	1.31947e-05	0.000186216	4.35685	CyPs
PKD2	0.48776	1.33211e-05	0.000187808	4.35476	CyPs
FOXK2	0.616727	1.34899e-05	0.000189992	4.352	CyPs
RNFT2	0.898943	1.36923e-05	0.000192645	4.34874	CyPs
FBN1	0.588293	1.37884e-05	0.000193799	4.3472	CyPs
RABL6	1.01825	1.3806e-05	0.000193847	4.34692	CyPs
RBM4	0.646328	1.38685e-05	0.000194527	4.34593	CyPs
STK39	0.489499	1.39009e-05	0.000194541	4.34542	CyPs
PACSIN2	0.597118	1.39027e-05	0.000194541	4.34539	CyPs
UIMC1	0.664447	1.39907e-05	0.000195297	4.34401	CyPs
JAM2	0.690896	1.39945e-05	0.000195297	4.34395	CyPs
ZFP36L2	0.83216	1.45242e-05	0.00020233	4.33578	CyPs
VPS13A	0.560036	1.45278e-05	0.00020233	4.33573	CyPs
LRP8	0.986454	1.45877e-05	0.000202958	4.33482	CyPs
USP14	0.570058	1.46514e-05	0.000203605	4.33386	CyPs
NOP56	0.819521	1.47346e-05	0.000204381	4.33262	CyPs
TRIM56	1.40623	1.48737e-05	0.000206102	4.33055	CyPs
BLM	0.587773	1.50319e-05	0.000207949	4.32822	CyPs
NID1	1.77826	1.50372e-05	0.000207949	4.32814	CyPs
FADS1	0.799672	1.53125e-05	0.000211331	4.32414	CyPs
PRELID2	1.07187	1.54776e-05	0.000213395	4.32178	CyPs
GNAQ	0.450623	1.55425e-05	0.000214075	4.32086	CyPs
PAG1	0.5565	1.58119e-05	0.000217351	4.31706	CyPs
GAPDH	0.474371	1.60527e-05	0.00022038	4.31372	CyPs
B4GALT5	0.653839	1.61577e-05	0.000221439	4.31228	CyPs
XRN2	0.585801	1.62778e-05	0.000222863	4.31065	CyPs
HGSNAT	0.61271	1.64608e-05	0.000225144	4.30817	CyPs
UBE2K	0.545899	1.65366e-05	0.000225956	4.30716	CyPs
PCM1	0.489266	1.67575e-05	0.000228521	4.30422	CyPs
PANK2	0.747447	1.7056e-05	0.000232361	4.30031	CyPs
DDX50	0.749876	1.71146e-05	0.000232928	4.29955	CyPs
LYPD6	2.13946	1.77409e-05	0.000241214	4.29158	CyPs
ILF3	0.686336	1.8028e-05	0.000244875	4.28801	CyPs
LRP1B	0.182679	1.87102e-05	0.000253889	4.27975	CyPs
STRN	0.630774	1.88498e-05	0.000255532	4.2781	CyPs
KIF18A	5.52136	1.88719e-05	0.00025558	4.27784	CyPs
HEG1	1.07068	1.91419e-05	0.000258727	4.27467	CyPs
APP	0.363072	1.96801e-05	0.00026574	4.26849	CyPs
RAB27A	1.03218	1.98228e-05	0.000267404	4.26688	CyPs
RPS19	0.559223	2.00448e-05	0.000270134	4.26439	CyPs
RPL41	0.649714	2.07369e-05	0.000278914	4.2568	CyPs
BTBD10	0.618504	2.11739e-05	0.000284235	4.25214	CyPs
PTBP1	1.19605	2.12535e-05	0.000285025	4.2513	CyPs
MIPOL1	0.565664	2.13749e-05	0.000286373	4.25002	CyPs
ODF2	1.0848	2.14791e-05	0.00028749	4.24893	CyPs
MTR	0.542366	2.15118e-05	0.000287648	4.24859	CyPs
ADNP	0.502835	2.15537e-05	0.000287927	4.24816	CyPs
PPP6R2	0.503856	2.22988e-05	0.000297592	4.24053	CyPs
VEGFA	0.713318	2.24481e-05	0.000299293	4.23904	CyPs
ARPP19	0.724455	2.25787e-05	0.000300743	4.23773	CyPs
RAPH1	0.574237	2.26079e-05	0.000300841	4.23744	CyPs
PDIA6	0.672087	2.26661e-05	0.000301323	4.23687	CyPs
CEP85	2.42797	2.28752e-05	0.000303809	4.2348	CyPs
LMNB2	2.56513	2.31252e-05	0.000306541	4.23236	CyPs
PM20D2	1.004	2.31471e-05	0.000306541	4.23215	CyPs
DDX39A	1.90355	2.35408e-05	0.000311445	4.22835	CyPs
SMG6	0.587	2.36267e-05	0.000312281	4.22753	CyPs
MTCH1	0.744292	2.36987e-05	0.000312932	4.22685	CyPs
CCDC34	3.24007	2.42795e-05	0.000320294	4.2214	CyPs
RIMKLB	0.597256	2.43296e-05	0.000320647	4.22093	CyPs
SBF2	0.457796	2.44876e-05	0.00032242	4.21947	CyPs
EXOSC9	1.72031	2.47156e-05	0.000325111	4.21738	CyPs
MCM9	0.719436	2.52133e-05	0.000331024	4.21288	CyPs
TMEM209	1.1935	2.64927e-05	0.000347489	4.20169	CyPs
TTC13	0.699977	2.66303e-05	0.000348961	4.20052	CyPs
STK38	0.71394	2.68898e-05	0.000351815	4.19832	CyPs
CTDSPL	0.550153	2.68993e-05	0.000351815	4.19824	CyPs
SYNCRIP	0.7776	2.71879e-05	0.000355252	4.19583	CyPs
GLRX3	0.647723	2.73151e-05	0.000356575	4.19477	CyPs
LARP1B	0.57826	2.73991e-05	0.000357332	4.19407	CyPs
HNRNPA0	1.03792	2.75139e-05	0.000358149	4.19312	CyPs
URI1	0.495595	2.76286e-05	0.000359302	4.19218	CyPs
SMARCA4	0.552103	2.76721e-05	0.000359528	4.19182	CyPs
AGBL3	0.952075	2.79308e-05	0.000362547	4.18971	CyPs
CLSTN2	0.767452	2.80208e-05	0.000362688	4.18898	CyPs
PTPN13	0.53703	2.82237e-05	0.000364969	4.18735	CyPs
SRSF1	0.811566	2.86653e-05	0.000370331	4.18382	CyPs
UBE2R2	0.567926	2.89016e-05	0.000373034	4.18195	CyPs
ERLIN1	1.04056	2.94145e-05	0.000379298	4.17795	CyPs
DHX15	0.564754	2.94488e-05	0.000379385	4.17769	CyPs
CDYL	0.606934	3.11531e-05	0.000400215	4.16487	CyPs
EIF3B	0.76012	3.12596e-05	0.000401208	4.16409	CyPs
MBD3	1.25981	3.16295e-05	0.000405578	4.16141	CyPs
DCUN1D4	0.551534	3.20544e-05	0.000410261	4.15836	CyPs
LDLR	0.934366	3.23772e-05	0.000414006	4.15607	CyPs
STXBP6	0.597503	3.26638e-05	0.000417282	4.15405	CyPs
SLC43A3	1.72619	3.278e-05	0.000418379	4.15324	CyPs
LRRCC1	1.16354	3.30353e-05	0.000421214	4.15147	CyPs
HACE1	0.583082	3.30634e-05	0.000421214	4.15127	CyPs
CDCA2	7.08843	3.33014e-05	0.000423853	4.14963	CyPs
FOXP1	0.549964	3.37435e-05	0.000429083	4.14661	CyPs
LRRC58	0.736867	3.5703e-05	0.00045358	4.13366	CyPs
DDX46	0.520044	3.6113e-05	0.000458366	4.13104	CyPs
EML6	0.641424	3.61696e-05	0.000458659	4.13068	CyPs
G3BP1	0.683265	3.6452e-05	0.000461815	4.12889	CyPs
CDC25A	4.74922	3.75292e-05	0.000474993	4.12219	CyPs
PDE1C	0.501542	3.75613e-05	0.000474993	4.12199	CyPs
CPSF4	1.37201	3.91146e-05	0.000494181	4.11265	CyPs
CHSY1	1.09571	3.91542e-05	0.000494227	4.11241	CyPs
UPF2	0.575888	3.95578e-05	0.000498864	4.11005	CyPs
TNC	2.17147	3.97642e-05	0.000501007	4.10885	CyPs
PIBF1	0.501162	4.04758e-05	0.000509506	4.10475	CyPs
SPCS3	0.619179	4.22515e-05	0.000531372	4.09481	CyPs
SIVA1	1.73267	4.23506e-05	0.000531656	4.09427	CyPs
POLD1	3.15432	4.23515e-05	0.000531656	4.09426	CyPs
FOXM1	4.45069	4.24797e-05	0.00053252	4.09356	CyPs
XPO6	0.534439	4.24977e-05	0.00053252	4.09346	CyPs
THOC1	0.602791	4.2763e-05	0.000534869	4.09202	CyPs
UCHL5	0.80977	4.52589e-05	0.000565058	4.07885	CyPs
EXOC4	0.414167	4.55935e-05	0.000568719	4.07714	CyPs
HP1BP3	0.507505	4.56716e-05	0.000569177	4.07674	CyPs
CDK2	5.17338	4.57571e-05	0.000569726	4.0763	CyPs
PRKAR2A	0.655738	4.67848e-05	0.000581468	4.07113	CyPs
NEIL3	8.48578	4.70962e-05	0.00058481	4.06959	CyPs
CBL	0.72939	4.71411e-05	0.000584839	4.06937	CyPs
C1orf159	1.17306	4.76168e-05	0.000590208	4.06703	CyPs
HAUS2	1.61683	4.7778e-05	0.000591672	4.06624	CyPs
TMED8	0.694785	4.89959e-05	0.000606208	4.06037	CyPs
TNFRSF19	0.970912	4.98363e-05	0.000616052	4.05639	CyPs
RPLP0	0.683104	4.99179e-05	0.000616507	4.05601	CyPs
ASH2L	0.892768	5.04977e-05	0.000622549	4.05331	CyPs
SNX7	0.594821	5.14254e-05	0.00063285	4.04905	CyPs
FSD1L	0.815096	5.17003e-05	0.000635664	4.0478	CyPs
SCFD2	0.504013	5.17772e-05	0.00063604	4.04746	CyPs
FBXO5	3.7807	5.31112e-05	0.000651263	4.0415	CyPs
CTNNA2	0.375672	5.33081e-05	0.000653095	4.04063	CyPs
MCU	0.601093	5.34107e-05	0.00065377	4.04018	CyPs
DCBLD2	0.522706	5.41836e-05	0.000662051	4.03681	CyPs
SAP130	0.749032	5.53131e-05	0.000675252	4.03196	CyPs
MSL1	0.652697	5.57562e-05	0.000679832	4.03009	CyPs
KITLG	2.0356	5.57872e-05	0.000679832	4.02996	CyPs
ZDHHC13	0.991399	5.65111e-05	0.000688043	4.02693	CyPs
HECTD2	0.592115	5.67497e-05	0.000690338	4.02593	CyPs
MYRFL	0.940525	5.71209e-05	0.000694239	4.0244	CyPs
BRD7	0.652779	5.79214e-05	0.000703346	4.02112	CyPs
ME3	0.5087	5.97947e-05	0.000725214	4.01362	CyPs
TBC1D22A	0.51092	5.98278e-05	0.000725214	4.01349	CyPs
UVRAG	0.492441	6.05524e-05	0.000733351	4.01065	CyPs
SPPL2A	0.669222	6.22495e-05	0.000752543	4.00412	CyPs
TCERG1	0.477538	6.23013e-05	0.000752543	4.00392	CyPs
HSP90AA1	0.477581	6.30513e-05	0.000760933	4.00109	CyPs
RFX3	0.445334	6.39426e-05	0.000770523	3.99777	CyPs
DNMBP	1.09446	6.44285e-05	0.000775511	3.99598	CyPs
FKBP5	0.528488	6.45762e-05	0.00077661	3.99543	CyPs
ANKHD1	0.592874	6.49731e-05	0.000780699	3.99398	CyPs
S100A6	1.14181	6.52322e-05	0.000782445	3.99304	CyPs
SPSB4	0.619058	6.55195e-05	0.000785206	3.992	CyPs
PEX3	0.654277	6.57052e-05	0.000786745	3.99132	CyPs
AIG1	0.507052	6.61514e-05	0.000791399	3.98972	CyPs
ARHGDIA	1.07409	6.6856e-05	0.000798439	3.98721	CyPs
NUP35	1.04582	6.70388e-05	0.000799927	3.98656	CyPs
AP3B1	0.510512	6.79126e-05	0.00080965	3.98348	CyPs
NAA50	0.734906	6.81559e-05	0.000811378	3.98263	CyPs
UCK2	0.730526	6.81756e-05	0.000811378	3.98256	CyPs
HSPA5	0.681477	7.08979e-05	0.000843047	3.97325	CyPs
PCSK7	0.634846	7.19221e-05	0.000854486	3.96984	CyPs
KRIT1	0.602364	7.45835e-05	0.000884577	3.96117	CyPs
ILF2	1.09451	7.47432e-05	0.000885707	3.96066	CyPs
FUT8	0.487451	7.62628e-05	0.000902158	3.95585	CyPs
NAA16	0.533185	7.78026e-05	0.000919582	3.95107	CyPs
ZFAND3	0.404952	7.82909e-05	0.000924559	3.94957	CyPs
CUL9	1.15228	7.90394e-05	0.000932597	3.94729	CyPs
WWP1	0.51108	7.91763e-05	0.000933411	3.94688	CyPs
ARHGAP33	1.08429	7.94993e-05	0.000936416	3.9459	CyPs
BCL7C	0.893348	7.97405e-05	0.000938377	3.94518	CyPs
CDT1	6.80423	7.98023e-05	0.000938377	3.94499	CyPs
RNF38	0.552108	7.99526e-05	0.000938584	3.94454	CyPs
RNF182	1.30368	7.99565e-05	0.000938584	3.94453	CyPs
USP22	0.555475	8.02074e-05	0.000940726	3.94378	CyPs
TRPC3	0.847018	8.09724e-05	0.000948889	3.9415	CyPs
USP13	0.679339	8.14103e-05	0.000953208	3.94021	CyPs
MAGI1	0.409293	8.31433e-05	0.000971843	3.93515	CyPs
BIRC5	6.42597	8.33965e-05	0.000973975	3.93442	CyPs
ROCK2	0.495864	8.71416e-05	0.00101599	3.92386	CyPs
MAP1B	0.504225	8.75061e-05	0.00101851	3.92285	CyPs
PKIA	0.545505	8.75852e-05	0.00101857	3.92264	CyPs
PARP14	0.525818	8.79456e-05	0.00102132	3.92165	CyPs
ANKRD44	0.412046	8.79707e-05	0.00102132	3.92158	CyPs
PPP1R12B	0.49278	8.81213e-05	0.00102221	3.92117	CyPs
HAUS6	1.35356	8.83939e-05	0.0010245	3.92042	CyPs
GLB1L3	1.49996	8.85881e-05	0.00102582	3.91989	CyPs
LRRC41	0.758217	8.96078e-05	0.00103595	3.91713	CyPs
PCSK1	2.45587	9.05019e-05	0.00104541	3.91474	CyPs
PARP9	0.648977	9.10954e-05	0.00105138	3.91316	CyPs
SIN3A	0.791018	9.25397e-05	0.00106716	3.90936	CyPs
HSP90B1	0.531632	9.30974e-05	0.00107269	3.90791	CyPs
NUDCD3	0.541051	9.34278e-05	0.00107559	3.90706	CyPs
CD63	0.603718	9.35837e-05	0.00107649	3.90665	CyPs
SPG11	0.47479	9.42587e-05	0.00108335	3.90491	CyPs
PAAF1	0.595057	9.44347e-05	0.00108446	3.90446	CyPs
CHD1	0.515087	9.48432e-05	0.00108824	3.90342	CyPs
WDR90	2.89464	9.62807e-05	0.0011029	3.89978	CyPs
TTC17	0.459179	9.6651e-05	0.00110622	3.89885	CyPs
CDH19	0.820975	9.6833e-05	0.00110738	3.89839	CyPs
SLC39A14	1.02799	9.70199e-05	0.00110859	3.89793	CyPs
ANO6	0.481337	9.79004e-05	0.0011168	3.89574	CyPs
ZNF346	0.592184	9.84253e-05	0.00112185	3.89444	CyPs
GLDC	0.659646	9.91754e-05	0.00112947	3.8926	CyPs
SH3RF1	0.538437	9.9514e-05	0.00113238	3.89177	CyPs
POLK	0.476009	9.99319e-05	0.0011356	3.89076	CyPs
EMC3	0.669774	9.9962e-05	0.0011356	3.89068	CyPs
FABP5	1.2414	0.000102081	0.00115872	3.88559	CyPs
HNRNPH3	0.550375	0.000102427	0.00116168	3.88477	CyPs
PAQR4	2.41668	0.000103909	0.00117752	3.88128	CyPs
ABCC4	0.927386	0.000104229	0.00118018	3.88053	CyPs
PTAR1	0.503161	0.000105028	0.00118824	3.87867	CyPs
MYH9	1.15896	0.000106392	0.00120269	3.87553	CyPs
HLCS	0.502972	0.000107928	0.00121904	3.87204	CyPs
DNAH14	1.15067	0.000108143	0.00122035	3.87156	CyPs
ELN	0.907315	0.00010907	0.00122779	3.86947	CyPs
SETX	0.511467	0.000109088	0.00122779	3.86944	CyPs
FAM13B	0.47565	0.000109149	0.00122779	3.8693	CyPs
FRYL	0.459026	0.000111337	0.00125138	3.86446	CyPs
GRIN2A	1.54331	0.000111527	0.0012525	3.86404	CyPs
RPGRIP1L	1.15468	0.000112014	0.00125693	3.86298	CyPs
HAUS5	1.84783	0.000114729	0.00128635	3.85712	CyPs
SP1	1.28291	0.000115614	0.00129522	3.85524	CyPs
ABL1	0.495858	0.00011644	0.00130341	3.8535	CyPs
UNK	0.541124	0.000116959	0.00130815	3.85241	CyPs
C1GALT1	0.57576	0.000117882	0.00131741	3.85049	CyPs
RFC5	2.48494	0.000120779	0.00134868	3.84454	CyPs
HDLBP	0.543634	0.000124685	0.00139109	3.83673	CyPs
ASH1L	0.416901	0.000124779	0.00139109	3.83654	CyPs
TRAM2	1.71677	0.000125013	0.00139257	3.83608	CyPs
NUP188	1.00029	0.000126031	0.00140277	3.83409	CyPs
ULK2	0.61671	0.000127425	0.00141449	3.83138	CyPs
CLDN12	0.71959	0.000127496	0.00141449	3.83125	CyPs
CREBZF	0.553356	0.000128773	0.00142751	3.82879	CyPs
COL22A1	2.39278	0.000129739	0.00143706	3.82695	CyPs
METTL4	1.05975	0.000130658	0.00144375	3.82522	CyPs
ANAPC1	0.63905	0.000131273	0.00144938	3.82406	CyPs
PKNOX1	0.673544	0.000133027	0.00146756	3.82079	CyPs
FTO	0.420352	0.000135416	0.00149272	3.8164	CyPs
FBXO34	0.757625	0.000136058	0.0014986	3.81523	CyPs
RCC1	2.1804	0.000137011	0.00150789	3.8135	CyPs
GCFC2	0.51089	0.000138629	0.00152325	3.8106	CyPs
NLGN1	0.231867	0.000138851	0.00152448	3.81021	CyPs
GALNT16	1.7175	0.000139044	0.00152538	3.80986	CyPs
COPG2	0.608377	0.000139293	0.00152689	3.80942	CyPs
PPME1	0.606601	0.000139674	0.00152984	3.80875	CyPs
SRRM1	0.532852	0.000139931	0.00153145	3.80829	CyPs
SEC63	0.490655	0.000140521	0.00153667	3.80725	CyPs
ENAH	0.460291	0.000141072	0.00154147	3.80628	CyPs
GKAP1	0.613085	0.000141226	0.00154193	3.80601	CyPs
APAF1	0.980071	0.000141481	0.00154349	3.80556	CyPs
KLHL23	0.485659	0.000144252	0.00157094	3.80076	CyPs
SCD	0.564741	0.00014434	0.00157094	3.80061	CyPs
XRCC3	3.08366	0.000144494	0.00157137	3.80035	CyPs
RGS22	1.019	0.000145576	0.00158189	3.7985	CyPs
RMND1	0.840224	0.00014834	0.00161065	3.79383	CyPs
PI4K2B	0.758275	0.000148484	0.00161093	3.79359	CyPs
LRRC63	2.28354	0.000148902	0.0016142	3.79289	CyPs
FBF1	1.75659	0.000149208	0.00161625	3.79238	CyPs
USP4	0.575412	0.000149834	0.00162175	3.79134	CyPs
GINS2	4.29147	0.000154653	0.00167116	3.78348	CyPs
PITPNB	0.484725	0.000154764	0.00167116	3.7833	CyPs
OIP5	2.55263	0.000156815	0.00169198	3.78002	CyPs
SUCLA2	0.563028	0.000158642	0.00171035	3.77714	CyPs
IPO11	0.7636	0.000160495	0.00172897	3.77424	CyPs
TMEM181	0.722608	0.000160926	0.0017309	3.77357	CyPs
DDX42	0.66282	0.000161194	0.00173242	3.77316	CyPs
XRCC6	0.627705	0.000161815	0.00173737	3.7722	CyPs
CCNI	0.463488	0.000161907	0.00173737	3.77206	CyPs
CYB5B	0.879115	0.000163275	0.00175069	3.76996	CyPs
TBC1D15	0.514147	0.000163534	0.0017511	3.76956	CyPs
TNRC18	0.526092	0.000163569	0.0017511	3.76951	CyPs
PCGF6	1.05468	0.00016416	0.00175606	3.76861	CyPs
SERBP1	0.621943	0.000165502	0.00176767	3.76658	CyPs
RPE	0.758208	0.000166027	0.0017719	3.76578	CyPs
WNK1	0.452191	0.000167338	0.0017845	3.76382	CyPs
BTF3L4	0.549729	0.000170296	0.00181324	3.75944	CyPs
BCL11B	0.984668	0.000172605	0.00183531	3.75607	CyPs
TSHZ2	0.735171	0.000177461	0.00188515	3.74911	CyPs
ONECUT1	0.998174	0.000178026	0.00188823	3.74832	CyPs
RPS20	0.714995	0.000178892	0.00189596	3.7471	CyPs
NPM1	0.781462	0.00017925	0.00189828	3.7466	CyPs
ZC3H18	1.09005	0.00018086	0.00191238	3.74435	CyPs
ARHGAP20	0.495139	0.000181261	0.00191515	3.7438	CyPs
CDC27	0.453363	0.000184079	0.00194311	3.73992	CyPs
API5	0.661963	0.00018419	0.00194311	3.73977	CyPs
GTSE1	5.04856	0.000184684	0.00194683	3.7391	CyPs
SETD3	0.542485	0.000184906	0.00194768	3.73879	CyPs
AP3M2	1.14352	0.000189087	0.00198867	3.73317	CyPs
RAN	1.01644	0.000192683	0.00202494	3.72842	CyPs
MAPK6	0.603437	0.000193225	0.00202886	3.72771	CyPs
MAZ	1.78449	0.000193351	0.00202886	3.72755	CyPs
SSRP1	1.32345	0.000195198	0.00204668	3.72515	CyPs
ZNF789	0.760522	0.000196129	0.00205425	3.72395	CyPs
EP400	0.480206	0.00019622	0.00205425	3.72383	CyPs
ABCA12	3.35902	0.000197053	0.00205827	3.72277	CyPs
MDM1	1.29998	0.000199896	0.00208634	3.71915	CyPs
ZNF451	0.44657	0.000200043	0.00208634	3.71896	CyPs
RHOA	0.613951	0.000201783	0.00210289	3.71677	CyPs
CAV1	1.63312	0.000202576	0.00210956	3.71578	CyPs
IFT81	0.66546	0.00020409	0.00212371	3.7139	CyPs
ABCD3	0.486751	0.000204402	0.00212417	3.71351	CyPs
DNM2	0.677188	0.000204443	0.00212417	3.71346	CyPs
ACOT7	0.792129	0.000208168	0.00216124	3.70889	CyPs
CTBP1	0.888132	0.000208837	0.00216655	3.70808	CyPs
SCN9A	0.452979	0.000209056	0.00216719	3.70781	CyPs
CCDC57	0.699465	0.000209694	0.00217216	3.70704	CyPs
COPA	0.454268	0.000211284	0.00218698	3.70513	CyPs
PSMD14	0.484241	0.000212599	0.00219894	3.70355	CyPs
SNX8	1.50859	0.000213066	0.00220046	3.703	CyPs
PRCP	0.616295	0.000213322	0.00220145	3.70269	CyPs
UPF3A	0.407609	0.000213789	0.00220461	3.70214	CyPs
TMX3	0.540452	0.000216905	0.00223507	3.69847	CyPs
FAM161A	1.25625	0.000218831	0.00225322	3.69622	CyPs
NEK6	0.862704	0.000222667	0.002291	3.69181	CyPs
CABIN1	0.495625	0.00022348	0.00229629	3.69088	CyPs
NEK10	1.42666	0.000224778	0.00230754	3.68941	CyPs
ADNP2	0.846324	0.000225962	0.00231796	3.68807	CyPs
ELOVL5	0.500462	0.00022623	0.00231899	3.68777	CyPs
MAP3K5	0.452491	0.00023053	0.0023613	3.68297	CyPs
KATNAL2	0.818311	0.000236636	0.00242107	3.67631	CyPs
RNPS1	0.631184	0.000236717	0.00242107	3.67622	CyPs
ANKRD17	0.4262	0.00023701	0.00242226	3.6759	CyPs
PAFAH1B1	0.44055	0.00023986	0.00244957	3.67285	CyPs
KHDC1	0.661021	0.000240396	0.0024514	3.67228	CyPs
RTN1	0.436593	0.000242219	0.00246815	3.67035	CyPs
ZFAND6	0.494061	0.000246284	0.00250772	3.66609	CyPs
NFX1	0.525217	0.000248695	0.0025304	3.6636	CyPs
BMPR1B	0.902895	0.000252199	0.00256415	3.66002	CyPs
DHX9	0.504801	0.000253226	0.00257269	3.65897	CyPs
KIF2C	4.36818	0.000255421	0.00259307	3.65676	CyPs
ZFP90	0.59244	0.000258249	0.00261985	3.65394	CyPs
IKBKB	0.850026	0.000260364	0.00263935	3.65184	CyPs
RGS3	3.20367	0.000263091	0.00266503	3.64917	CyPs
TANGO6	0.553469	0.000267084	0.00270349	3.6453	CyPs
TMX4	0.63235	0.000268541	0.00271624	3.6439	CyPs
SH3GL2	0.767548	0.000270022	0.00272921	3.64248	CyPs
UBE2G2	0.44661	0.000271692	0.00274407	3.6409	CyPs
PRMT3	0.492494	0.000272367	0.00274886	3.64026	CyPs
NUP43	1.17653	0.000273009	0.00275333	3.63965	CyPs
USP32	0.460963	0.000273634	0.00275666	3.63906	CyPs
NRG3	0.355371	0.000273741	0.00275666	3.63896	CyPs
SLC25A25	1.17846	0.000281356	0.00282768	3.63189	CyPs
BRI3BP	1.06307	0.000281411	0.00282768	3.63184	CyPs
EME1	6.29005	0.00028272	0.00283876	3.63064	CyPs
GRK4	0.493823	0.000288319	0.00289287	3.62557	CyPs
ZNF407	0.460001	0.000289746	0.00290506	3.6243	CyPs
KCTD3	0.439903	0.000294893	0.00295237	3.61975	CyPs
ZBTB1	0.541648	0.000295847	0.00295976	3.61891	CyPs
FAM20B	0.892359	0.000296156	0.0029607	3.61864	CyPs
PDIA3	0.535565	0.000297558	0.00297255	3.61742	CyPs
AGPS	0.521712	0.000298016	0.00297497	3.61702	CyPs
ASXL2	0.486631	0.000299962	0.00299222	3.61533	CyPs
GLE1	1.10812	0.0003007	0.0029974	3.6147	CyPs
CMTM8	1.14109	0.000302343	0.0030116	3.61328	CyPs
EIF2S1	0.909702	0.000303341	0.00301717	3.61243	CyPs
ANAPC5	0.470861	0.000303765	0.0030192	3.61207	CyPs
BAZ1A	0.819142	0.00030687	0.00304786	3.60943	CyPs
KANSL3	0.665722	0.000313911	0.00311554	3.60354	CyPs
TBK1	0.593161	0.000319611	0.00316982	3.59886	CyPs
LMF2	1.49848	0.000322019	0.00319141	3.59691	CyPs
CSPP1	0.464865	0.000322558	0.00319444	3.59648	CyPs
RAB39A	1.40502	0.000332014	0.00328572	3.58895	CyPs
MSH3	0.46375	0.000335033	0.00331152	3.58659	CyPs
LAMA3	3.25388	0.000335103	0.00331152	3.58653	CyPs
CDC42SE2	0.510862	0.000337106	0.00332816	3.58498	CyPs
CCT2	0.73305	0.000337271	0.00332816	3.58485	CyPs
RAPGEF6	0.476388	0.000339795	0.00335066	3.5829	CyPs
KANK2	2.1632	0.000347984	0.00342328	3.57668	CyPs
TRAPPC9	0.443436	0.000348155	0.00342328	3.57655	CyPs
SNTG1	0.21857	0.000348961	0.00342874	3.57595	CyPs
NT5M	1.55772	0.000351311	0.00344937	3.57419	CyPs
ZNF148	0.400332	0.000360046	0.00353261	3.56776	CyPs
EID1	0.508758	0.000363058	0.00355963	3.56558	CyPs
HLTF	0.473166	0.000365213	0.0035782	3.56402	CyPs
HYLS1	2.36905	0.000375374	0.0036647	3.55682	CyPs
CCDC77	1.66348	0.000376517	0.00367325	3.55602	CyPs
MYO1C	1.9207	0.000377686	0.00368204	3.5552	CyPs
LPIN2	0.613466	0.000378177	0.00368421	3.55486	CyPs
RALGPS1	0.448648	0.000378721	0.00368689	3.55448	CyPs
ARID1A	0.437577	0.00037946	0.00369148	3.55397	CyPs
GFOD1	0.528276	0.000381503	0.00370873	3.55256	CyPs
CDR2	0.657127	0.000382038	0.00371131	3.55219	CyPs
TPM3	0.992485	0.000384887	0.00373634	3.55024	CyPs
XPO4	0.462622	0.000391862	0.00380137	3.5455	CyPs
MROH1	0.905493	0.000392673	0.00380655	3.54496	CyPs
FARP1	0.443186	0.000394982	0.00382623	3.54341	CyPs
PTP4A2	0.870827	0.000397814	0.00384647	3.54153	CyPs
ICA1L	0.458504	0.000397911	0.00384647	3.54147	CyPs
HSPD1	0.507766	0.000398706	0.00385145	3.54094	CyPs
SLC25A17	0.811568	0.000401546	0.00387589	3.53907	CyPs
NCAPH	4.57623	0.0004018	0.00387589	3.5389	CyPs
PPP1CC	0.616316	0.000403388	0.00388848	3.53786	CyPs
AMBRA1	0.426335	0.000404895	0.00390027	3.53687	CyPs
SRSF7	0.560767	0.000407465	0.00392228	3.5352	CyPs
CACNA1D	0.419963	0.000410004	0.00394396	3.53356	CyPs
RPL21	0.677429	0.000414333	0.00398282	3.53078	CyPs
IQCH	1.12305	0.000417623	0.00400884	3.52869	CyPs
PIEZO1	0.744692	0.000418318	0.0040127	3.52825	CyPs
PRPSAP1	0.617997	0.000419002	0.00401646	3.52782	CyPs
CCT6A	0.766892	0.000422155	0.00404387	3.52583	CyPs
MZT2A	0.890575	0.000422535	0.00404468	3.52559	CyPs
FANCD2OS	4.60742	0.000423025	0.00404655	3.52529	CyPs
DAG1	0.644693	0.000424171	0.0040547	3.52457	CyPs
AZIN1	0.54472	0.000431562	0.00412248	3.51999	CyPs
HNRNPC	0.411915	0.000436585	0.00416468	3.51692	CyPs
TRAPPC10	0.548056	0.000444699	0.0042362	3.51203	CyPs
RANGAP1	1.17037	0.000445711	0.00424256	3.51142	CyPs
FANCG	3.13872	0.000445984	0.00424256	3.51126	CyPs
TUBB2B	0.559475	0.000446776	0.00424715	3.51079	CyPs
STK24	0.56181	0.000447192	0.00424817	3.51054	CyPs
BCL2L13	0.579315	0.000448897	0.00426142	3.50953	CyPs
GMDS	0.560623	0.000462398	0.00438354	3.50164	CyPs
SNRNP40	0.774289	0.000466043	0.00441505	3.49955	CyPs
RBM15	1.36032	0.000469473	0.00444448	3.4976	CyPs
KPNA4	0.528109	0.000470433	0.0044505	3.49705	CyPs
ESPL1	5.75718	0.000474894	0.00448606	3.49453	CyPs
ACADVL	0.769669	0.000474911	0.00448606	3.49452	CyPs
ZC3H7A	0.458866	0.000475172	0.00448606	3.49438	CyPs
EZR	2.69631	0.000478131	0.0045109	3.49272	CyPs
YY1AP1	0.493192	0.000486658	0.00458506	3.48799	CyPs
SET	0.707521	0.000489006	0.00460402	3.48671	CyPs
CENPE	4.59559	0.00048955	0.00460599	3.48641	CyPs
PKN3	5.14868	0.000490385	0.00461069	3.48595	CyPs
TRIP13	5.12862	0.000493382	0.0046357	3.48432	CyPs
CPSF3	1.08558	0.000501643	0.0047101	3.47988	CyPs
AP3B2	0.509542	0.000504799	0.00473589	3.4782	CyPs
NBPF9	0.892051	0.000505079	0.00473589	3.47805	CyPs
RBM6	0.434795	0.000507128	0.00475186	3.47696	CyPs
RGMB	0.666793	0.000508485	0.00476134	3.47625	CyPs
IFNAR1	0.478594	0.000512962	0.00479672	3.47389	CyPs
ENO4	1.42535	0.000514097	0.00480407	3.4733	CyPs
VRK2	0.61772	0.000527971	0.00493036	3.46615	CyPs
AP2A1	0.720538	0.000528759	0.00493102	3.46575	CyPs
SLC12A6	0.564152	0.000537928	0.00501312	3.46112	CyPs
ALG6	0.687871	0.000541503	0.00504302	3.45934	CyPs
SPC24	3.99568	0.000542088	0.00504505	3.45905	CyPs
PASK	3.157	0.000545244	0.00507099	3.45748	CyPs
UGGT1	0.598308	0.000550503	0.00511298	3.4549	CyPs
ZBTB8OS	0.506503	0.00056275	0.0052232	3.44896	CyPs
ZNF654	0.474233	0.000571469	0.00529697	3.44481	CyPs
CDC5L	0.715398	0.000571948	0.00529784	3.44458	CyPs
DAPK2	0.974074	0.000573655	0.00531008	3.44377	CyPs
SYNJ1	0.454335	0.0005775	0.00534207	3.44197	CyPs
TIMM23	0.886369	0.000578768	0.00535019	3.44137	CyPs
MRPS6	0.604981	0.00058798	0.0054317	3.4371	CyPs
CDK17	0.53659	0.00059264	0.00547107	3.43496	CyPs
LIN7A	0.88691	0.000599441	0.00553014	3.43187	CyPs
NR2C1	0.541041	0.000600631	0.00553741	3.43133	CyPs
OSBPL10	1.24759	0.000601265	0.00553954	3.43104	CyPs
TMEFF2	0.4607	0.000602128	0.00554378	3.43065	CyPs
TMEM165	0.419448	0.000603955	0.00555687	3.42983	CyPs
PUM2	0.404366	0.00060446	0.0055578	3.42961	CyPs
ALDH1A2	2.89549	0.000604878	0.00555793	3.42942	CyPs
NT5C2	0.440923	0.000608025	0.00557966	3.42801	CyPs
COMMD4	1.22771	0.000608055	0.00557966	3.428	CyPs
ENO2	0.754524	0.000625132	0.00572871	3.42047	CyPs
UBE2L3	0.646002	0.00062742	0.0057441	3.41948	CyPs
CPNE4	1.65247	0.000628725	0.00575014	3.41891	CyPs
ARSB	0.470409	0.000632987	0.00578229	3.41707	CyPs
ITGB1BP1	0.572833	0.000633461	0.00578229	3.41687	CyPs
ZNF138	0.514277	0.000633503	0.00578229	3.41685	CyPs
ZNF257	1.73471	0.000635205	0.00579243	3.41612	CyPs
GTF2H2C	0.879802	0.000635456	0.00579243	3.41601	CyPs
VAV2	0.516226	0.000639266	0.00582329	3.41438	CyPs
STRIP2	0.95567	0.000640659	0.0058244	3.41379	CyPs
SRSF12	1.01074	0.000644178	0.00585252	3.4123	CyPs
DEPDC4	1.76908	0.000646764	0.00587214	3.41121	CyPs
RNF4	0.795999	0.000648973	0.0058883	3.41028	CyPs
PLOD2	0.49689	0.000659701	0.0059817	3.4058	CyPs
EMP2	0.872478	0.000661413	0.00599326	3.40509	CyPs
ALG5	0.56251	0.000669096	0.00605889	3.40194	CyPs
ABI2	0.413537	0.000669926	0.00606241	3.4016	CyPs
ARHGEF3	0.448289	0.000671224	0.00607016	3.40107	CyPs
PPAT	1.10587	0.000675826	0.00610189	3.3992	CyPs
SFXN1	0.446801	0.000676064	0.00610189	3.39911	CyPs
MGMT	0.702806	0.000677027	0.00610657	3.39872	CyPs
PRSS23	0.751595	0.000678615	0.00611688	3.39808	CyPs
BCLAF1	0.455208	0.000680555	0.00613034	3.3973	CyPs
NAB1	0.675225	0.000689274	0.00620482	3.39381	CyPs
SUPT20H	0.501336	0.000691756	0.00622309	3.39283	CyPs
ZNF141	0.571246	0.000698097	0.0062751	3.39033	CyPs
FBXW7	0.415792	0.000698756	0.0062751	3.39007	CyPs
PRPF40A	0.455672	0.000698908	0.0062751	3.39001	CyPs
GNAL	0.466428	0.000702436	0.00629855	3.38863	CyPs
DNAJC13	0.453157	0.000710276	0.00636471	3.38558	CyPs
DOK5	0.662446	0.000711154	0.00636842	3.38524	CyPs
STX2	0.909077	0.000718366	0.00642882	3.38247	CyPs
LPCAT3	0.685614	0.000719511	0.00643487	3.38203	CyPs
PKD1	0.50796	0.000722696	0.00645646	3.38082	CyPs
SYNJ2	0.939146	0.000722864	0.00645646	3.38076	CyPs
BTAF1	0.436598	0.000728213	0.00650001	3.37873	CyPs
FAM114A1	0.791939	0.000729652	0.00650863	3.37819	CyPs
DPH6	0.438743	0.000734949	0.00655163	3.3762	CyPs
TEX9	1.14535	0.000742188	0.00660759	3.3735	CyPs
TTC7A	0.645947	0.000742682	0.0066077	3.37332	CyPs
FAM168A	0.399845	0.000747638	0.0066432	3.37149	CyPs
ZNF675	0.663624	0.000752988	0.00668642	3.36952	CyPs
SMURF1	0.503258	0.000754485	0.00669106	3.36897	CyPs
MAPKAPK5	0.645556	0.000756845	0.00670766	3.36811	CyPs
CDKN3	4.03595	0.00076594	0.0067839	3.36482	CyPs
TTF1	1.02361	0.000770497	0.00681548	3.36318	CyPs
RPSA	0.578866	0.000775787	0.00685785	3.36129	CyPs
CORO1C	0.435135	0.000787177	0.00695407	3.35726	CyPs
PLEKHG2	1.86357	0.000788436	0.00696072	3.35682	CyPs
TTC7B	0.408925	0.000791792	0.00698138	3.35565	CyPs
ITPKB	1.14526	0.000793701	0.00699373	3.35498	CyPs
NACA	0.454532	0.000810485	0.00713704	3.34919	CyPs
VTA1	0.62091	0.000812557	0.00715071	3.34848	CyPs
VPS13B	0.395437	0.000813638	0.00715565	3.34811	CyPs
PARP1	1.03474	0.000815314	0.0071658	3.34754	CyPs
UBALD2	0.842767	0.000823637	0.00723433	3.34473	CyPs
OTUD3	0.847513	0.000825686	0.00724769	3.34404	CyPs
DEPDC5	0.84843	0.000826457	0.00724982	3.34378	CyPs
AK4	1.26952	0.000834142	0.00731258	3.34121	CyPs
STAMBPL1	0.653137	0.000835017	0.00731558	3.34092	CyPs
LITAF	0.719465	0.000843248	0.00738299	3.33819	CyPs
ACAP2	0.428598	0.000845238	0.0073957	3.33754	CyPs
MAP2K1	0.616259	0.000851436	0.00744519	3.33551	CyPs
MEIS2	0.374031	0.000860073	0.00751593	3.3327	CyPs
RECQL4	4.58083	0.0008645	0.00754658	3.33127	CyPs
TTC39C	0.542034	0.000864678	0.00754658	3.33122	CyPs
PABPC1L	0.997348	0.000878283	0.0076556	3.32687	CyPs
DPY19L4	0.560986	0.000885505	0.00771366	3.32458	CyPs
ZDHHC20	0.435921	0.000903672	0.00785698	3.31892	CyPs
WWTR1	1.18628	0.00090696	0.0078756	3.3179	CyPs
MED15	0.528893	0.000911036	0.00790599	3.31665	CyPs
ZNF492	3.66495	0.000915983	0.00794391	3.31514	CyPs
CTCF	0.793557	0.000922411	0.00799462	3.31318	CyPs
CDCA7L	0.816882	0.000926437	0.00802445	3.31196	CyPs
SLC1A4	1.41169	0.000945612	0.00818538	3.30623	CyPs
ZNF710	0.686151	0.000949127	0.00820956	3.30519	CyPs
KIAA0825	0.47815	0.000950166	0.00820956	3.30488	CyPs
FBXL20	0.476186	0.000950197	0.00820956	3.30487	CyPs
GUSB	1.26832	0.000952848	0.00822729	3.30409	CyPs
PLXNB2	1.21577	0.000955364	0.00824384	3.30335	CyPs
SLX4IP	0.488112	0.000961946	0.00829543	3.30143	CyPs
N4BP2	0.467625	0.000962732	0.008297	3.3012	CyPs
TRAIP	4.21563	0.000982569	0.00846266	3.29547	CyPs
CEP70	0.597005	0.000989711	0.00851883	3.29344	CyPs
SLC35E3	0.528348	0.00099773	0.00858247	3.29117	CyPs
PRKAA2	0.432623	0.00100449	0.00863523	3.28927	CyPs
ENOX1	0.416866	0.00100565	0.00863981	3.28894	CyPs
TUBA1A	0.357636	0.00101153	0.00868484	3.2873	CyPs
SENP5	0.439355	0.00101364	0.00869215	3.28671	CyPs
MICAL3	0.384512	0.00102598	0.00879249	3.2833	CyPs
TENM3	1.07413	0.0010283	0.00880687	3.28267	CyPs
RPS24	0.420682	0.00103042	0.00881956	3.28209	CyPs
PTBP2	0.355303	0.00103755	0.00887503	3.28014	CyPs
CPNE8	0.637117	0.001068	0.00912415	3.27197	CyPs
PIGN	0.45638	0.00107041	0.00913904	3.27134	CyPs
SETD2	0.407937	0.00107498	0.00917234	3.27013	CyPs
GFAP	0.585545	0.00108036	0.00921254	3.26872	CyPs
TERF2	0.706143	0.00108534	0.00924931	3.26742	CyPs
GGA2	0.551846	0.0010883	0.00926873	3.26665	CyPs
NPLOC4	0.581809	0.00109012	0.00927851	3.26617	CyPs
CAPN2	0.410146	0.00109434	0.00930292	3.26508	CyPs
RNF213	0.499152	0.00109579	0.0093095	3.2647	CyPs
PAXBP1	0.398264	0.00111939	0.0095041	3.25866	CyPs
TRIM13	0.570386	0.00112499	0.00954572	3.25725	CyPs
SNRPD1	0.981722	0.00115988	0.00983573	3.24857	CyPs
KCNK10	0.592655	0.00116677	0.00988806	3.24688	CyPs
IL17RB	0.585918	0.00116917	0.00990225	3.2463	CyPs
CCND1	0.548921	0.00117321	0.00993036	3.24532	CyPs
TMA16	1.01623	0.00117437	0.00993407	3.24503	CyPs
LARP4B	0.406063	0.00117715	0.00995145	3.24436	CyPs
CEP44	0.59663	0.00117855	0.00995718	3.24402	CyPs
GLI3	2.64356	0.00118134	0.00997461	3.24335	CyPs
KPNA3	0.447732	0.0011826	0.00997687	3.24304	CyPs
EPB41L4B	0.820827	0.00118306	0.00997687	3.24293	CyPs
LNPEP	0.470671	0.00118417	0.00998013	3.24267	CyPs
AHCTF1	0.444469	0.00118937	0.0100178	3.24142	CyPs
ZNF331	0.84101	0.0012014	0.0101062	3.23855	CyPs
KBTBD2	0.79014	0.00120207	0.0101062	3.23839	CyPs
CARHSP1	0.89944	0.00120513	0.01012	3.23766	CyPs
ALG10B	1.21741	0.00120518	0.01012	3.23765	CyPs
ZNF609	0.396565	0.00121341	0.0101828	3.23571	CyPs
SCCPDH	0.589549	0.00121727	0.010209	3.2348	CyPs
SF1	0.398204	0.00123185	0.010325	3.2314	CyPs
FAM169A	0.409205	0.0012334	0.0103317	3.23104	CyPs
PEX14	0.59442	0.0012407	0.0103865	3.22935	CyPs
NCAM2	0.275212	0.00124523	0.0104181	3.22831	CyPs
CDK10	1.05702	0.00124697	0.0104263	3.22791	CyPs
ZNF800	0.453812	0.00127705	0.0106713	3.22109	CyPs
CLASRP	0.537962	0.00128056	0.0106942	3.2203	CyPs
DTNA	0.295832	0.0012826	0.0107047	3.21984	CyPs
SUV39H2	1.37333	0.00128573	0.0107243	3.21915	CyPs
SKI	0.677245	0.00129193	0.0107695	3.21777	CyPs
ZNRF1	0.572256	0.00130834	0.0108865	3.21414	CyPs
OPA1	0.401925	0.00131147	0.0109059	3.21346	CyPs
CSNK1G1	0.632475	0.00131378	0.0109126	3.21295	CyPs
USP48	0.429179	0.00131526	0.0109126	3.21263	CyPs
APLP2	0.414579	0.00131529	0.0109126	3.21262	CyPs
KPNA2	2.25449	0.00131546	0.0109126	3.21259	CyPs
PNKP	1.32722	0.00132148	0.010956	3.21127	CyPs
DCAF16	0.639545	0.0013292	0.0110133	3.2096	CyPs
APTX	0.473359	0.001336	0.011063	3.20813	CyPs
PYGB	0.525097	0.00135419	0.0112002	3.20424	CyPs
HIVEP3	0.405163	0.00135642	0.0112119	3.20377	CyPs
ANAPC4	0.474335	0.00135801	0.0112183	3.20343	CyPs
ATXN10	0.37774	0.00136295	0.0112524	3.20238	CyPs
TUBB6	2.44855	0.00136531	0.011265	3.20189	CyPs
IGF2BP2	0.660138	0.00136995	0.0112965	3.20091	CyPs
TMEM161B	0.447606	0.00137159	0.0113033	3.20056	CyPs
SFXN2	1.13572	0.00137996	0.0113655	3.19881	CyPs
TUBGCP4	0.805086	0.00138181	0.0113738	3.19842	CyPs
PEG10	1.06234	0.00138736	0.0114103	3.19727	CyPs
RAD54L2	0.577258	0.0013879	0.0114103	3.19716	CyPs
FSD1	0.98077	0.00139123	0.0114309	3.19646	CyPs
PFKFB3	0.533258	0.00140349	0.0115242	3.19393	CyPs
SEC22A	0.502735	0.00140906	0.0115566	3.19279	CyPs
GSR	0.944951	0.00141665	0.011612	3.19124	CyPs
RASGEF1C	0.97418	0.00142057	0.0116372	3.19044	CyPs
GALNT7	0.436107	0.00142646	0.0116784	3.18924	CyPs
PLXNC1	0.585339	0.00142974	0.0116983	3.18858	CyPs
MRPS27	0.502167	0.00144262	0.0117897	3.18598	CyPs
THOC3	1.91186	0.00145828	0.0118995	3.18286	CyPs
SSBP4	0.96392	0.00145831	0.0118995	3.18285	CyPs
ZMYM1	0.893839	0.00145865	0.0118995	3.18279	CyPs
PPP1CB	0.4744	0.00146346	0.0119316	3.18183	CyPs
XRCC1	1.11073	0.0014674	0.0119542	3.18106	CyPs
WDR17	0.417274	0.00146797	0.0119542	3.18094	CyPs
XPC	0.647341	0.00148058	0.0120385	3.17846	CyPs
ACAT2	0.633063	0.00148983	0.0121036	3.17666	CyPs
UQCC2	0.747308	0.00150543	0.0122231	3.17363	CyPs
MED4	0.51783	0.00150977	0.0122511	3.1728	CyPs
POGZ	0.3893	0.00151386	0.012277	3.17201	CyPs
EPM2AIP1	0.440254	0.00151846	0.0122956	3.17113	CyPs
CTNNBIP1	0.677743	0.00151883	0.0122956	3.17106	CyPs
GTPBP10	0.522134	0.00152045	0.0123014	3.17075	CyPs
TMED10	0.375745	0.00153665	0.0124106	3.16767	CyPs
TRAK2	0.443646	0.00154122	0.0124401	3.16681	CyPs
TEX30	1.55754	0.00155631	0.0125546	3.16397	CyPs
DIS3L2	0.396789	0.00156714	0.0126271	3.16195	CyPs
EHMT1	0.391722	0.00157172	0.0126501	3.16111	CyPs
DENND1B	0.409481	0.00157183	0.0126501	3.16108	CyPs
ZNF93	1.64807	0.00157656	0.0126807	3.16021	CyPs
VTI1A	0.386085	0.00158034	0.0126963	3.15951	CyPs
MANEA	1.01246	0.0015821	0.012703	3.15919	CyPs
HAS2	0.715429	0.00158605	0.0127273	3.15846	CyPs
PTPN2	0.636096	0.00158829	0.0127378	3.15805	CyPs
DAZAP1	0.681038	0.00160178	0.0128385	3.15558	CyPs
NUP50	0.810135	0.0016191	0.0129623	3.15244	CyPs
ING5	0.546273	0.00162717	0.0130193	3.15099	CyPs
TMEM41B	0.446593	0.00163482	0.0130728	3.14962	CyPs
HMGB1	0.379368	0.00163872	0.0130964	3.14893	CyPs
LRRC20	1.38532	0.00164303	0.0131233	3.14816	CyPs
TRIM28	0.95628	0.0016443	0.0131257	3.14793	CyPs
PRR11	3.07941	0.00164992	0.013163	3.14693	CyPs
PDSS1	1.02705	0.00166556	0.01328	3.14418	CyPs
UBE3A	0.384128	0.0016859	0.0134344	3.14062	CyPs
PSMC3IP	3.24548	0.00168752	0.0134395	3.14034	CyPs
ZNF681	1.06991	0.00169943	0.0135266	3.13828	CyPs
SVIP	1.33859	0.00170205	0.0135395	3.13783	CyPs
CACNB2	0.484642	0.00170588	0.0135579	3.13717	CyPs
PITPNM2	0.571175	0.00170633	0.0135579	3.13709	CyPs
RAP1GAP2	1.02538	0.00170872	0.0135691	3.13668	CyPs
ZNF611	0.828472	0.00171741	0.0136302	3.13519	CyPs
RPN1	0.607517	0.00172972	0.0137121	3.1331	CyPs
CDC42BPA	0.358374	0.00173381	0.0137366	3.1324	CyPs
ICMT	1.93991	0.00173649	0.0137499	3.13195	CyPs
TANK	0.41888	0.00175153	0.013861	3.12942	CyPs
AK3	0.413315	0.00175885	0.0139109	3.12819	CyPs
CACNG8	0.542133	0.00177263	0.0140104	3.1259	CyPs
AK2	0.673581	0.00177468	0.0140119	3.12556	CyPs
KIF13B	0.389114	0.0017795	0.0140419	3.12476	CyPs
TK1	6.0307	0.00178105	0.0140461	3.1245	CyPs
SGSM2	0.605216	0.00178546	0.0140728	3.12378	CyPs
PABPC4	1.09955	0.00179721	0.0141565	3.12185	CyPs
KIAA0319	2.43353	0.00179815	0.0141565	3.12169	CyPs
EXOG	0.475562	0.00181808	0.0143052	3.11845	CyPs
LATS1	0.411627	0.00182925	0.014385	3.11664	CyPs
UXS1	0.623271	0.00183315	0.0144074	3.11601	CyPs
POLDIP3	0.674665	0.00183486	0.0144125	3.11574	CyPs
OXSR1	0.456168	0.00183934	0.0144395	3.11502	CyPs
SYNE3	0.690617	0.00184344	0.0144634	3.11436	CyPs
DTNB	0.387857	0.00184928	0.014501	3.11343	CyPs
ERGIC2	0.436809	0.00187736	0.0147127	3.10898	CyPs
EFR3B	0.962404	0.0018937	0.0148324	3.10642	CyPs
PALM	0.736646	0.00189706	0.0148502	3.10589	CyPs
ARHGEF40	0.641739	0.00189996	0.0148644	3.10544	CyPs
SMAD4	0.468481	0.00190953	0.0149279	3.10395	CyPs
DNAJC3	0.456789	0.00191024	0.0149279	3.10384	CyPs
DYNC1LI2	0.35333	0.00191474	0.0149545	3.10315	CyPs
ECI1	1.07414	0.00193549	0.0151054	3.09996	CyPs
PPIA	0.54853	0.00193709	0.0151054	3.09971	CyPs
DLG4	1.07638	0.00193735	0.0151054	3.09967	CyPs
TUBB4B	1.16947	0.00195621	0.0152362	3.0968	CyPs
DSCC1	1.71966	0.00195634	0.0152362	3.09678	CyPs
PALB2	1.51042	0.00196473	0.0152929	3.09551	CyPs
MDM2	0.508385	0.0019757	0.0153521	3.09386	CyPs
MDM4	0.377207	0.0019925	0.015474	3.09135	CyPs
MIPEP	0.689203	0.00200748	0.0155737	3.08912	CyPs
NCL	0.463931	0.00200761	0.0155737	3.0891	CyPs
SREBF2	0.374128	0.0020146	0.0156191	3.08807	CyPs
NAMPT	0.787548	0.00201794	0.0156304	3.08758	CyPs
ANP32E	1.45862	0.00201861	0.0156304	3.08748	CyPs
POM121C	0.402936	0.00203594	0.015749	3.08494	CyPs
PLSCR4	0.445586	0.00205063	0.0158537	3.0828	CyPs
NCOA6	0.387607	0.00206135	0.0159187	3.08125	CyPs
CASP2	1.19858	0.00207171	0.0159897	3.07975	CyPs
TMCC1	0.370509	0.00207726	0.0160236	3.07896	CyPs
KDM2B	0.487347	0.00208121	0.016045	3.07839	CyPs
ARHGEF28	0.571479	0.00214377	0.0165088	3.06956	CyPs
MAPK1	0.37711	0.00215185	0.0165618	3.06843	CyPs
METTL8	0.633664	0.00215423	0.0165708	3.0681	CyPs
SRR	1.53344	0.00216651	0.0166559	3.0664	CyPs
MBD4	0.659488	0.00217658	0.016724	3.06502	CyPs
PIGL	0.459842	0.00219282	0.01683	3.06279	CyPs
DDX59	0.765207	0.00219571	0.0168358	3.0624	CyPs
RAF1	0.369625	0.00219603	0.0168358	3.06236	CyPs
HS6ST3	0.296615	0.00220142	0.0168678	3.06162	CyPs
R3HDM1	0.343905	0.00220685	0.0168999	3.06088	CyPs
LSM5	1.13579	0.00222707	0.0170453	3.05815	CyPs
BACH1	0.380636	0.00223107	0.0170591	3.05761	CyPs
ADD2	0.629817	0.00223136	0.0170591	3.05757	CyPs
SUPT3H	0.391715	0.00223383	0.0170685	3.05724	CyPs
GNA13	0.564909	0.00223583	0.0170743	3.05697	CyPs
PHF2	0.584314	0.00223879	0.0170874	3.05658	CyPs
SCAI	0.456249	0.00224115	0.0170959	3.05626	CyPs
ANKFY1	0.465683	0.00225457	0.0171888	3.05447	CyPs
KIAA0753	0.786139	0.00228186	0.0173869	3.05086	CyPs
HSPBAP1	0.981395	0.00228435	0.0173869	3.05053	CyPs
ARHGAP5	0.36522	0.00229161	0.0174324	3.04958	CyPs
AADAT	0.706779	0.00229384	0.0174398	3.04929	CyPs
XPNPEP3	0.581035	0.00229859	0.0174662	3.04867	CyPs
TRANK1	0.506996	0.00230232	0.0174849	3.04818	CyPs
RPS6	0.501586	0.00231879	0.0176003	3.04604	CyPs
CDH24	2.26123	0.00232053	0.0176037	3.04581	CyPs
HNRNPA2B1	0.365989	0.00233952	0.017738	3.04336	CyPs
ZNF33A	0.442148	0.00235789	0.0178674	3.04101	CyPs
HSPA9	0.42996	0.00236115	0.0178819	3.04059	CyPs
NFIX	0.439372	0.00236239	0.0178819	3.04043	CyPs
ACVR2B	0.775485	0.00237225	0.0179368	3.03918	CyPs
GXYLT1	0.846821	0.00237619	0.0179566	3.03868	CyPs
STRADA	0.623178	0.00237872	0.0179659	3.03836	CyPs
RSRC2	0.420863	0.00239213	0.0180491	3.03666	CyPs
ZNF236	0.459307	0.00239367	0.0180491	3.03647	CyPs
EWSR1	0.444953	0.00239622	0.0180584	3.03615	CyPs
LGALS1	1.186	0.00240409	0.0181078	3.03516	CyPs
ORC1	4.37826	0.00240727	0.0181218	3.03476	CyPs
TP53	1.19026	0.00241542	0.0181731	3.03374	CyPs
STT3A	0.907453	0.00241923	0.0181919	3.03326	CyPs
CDC42BPB	0.442777	0.00242692	0.0182397	3.03231	CyPs
COBLL1	1.70252	0.00245014	0.0184042	3.02943	CyPs
ANKRD20A1	0.765075	0.00245693	0.0184451	3.0286	CyPs
NUMA1	0.462224	0.00247486	0.0185696	3.0264	CyPs
SORCS1	0.32998	0.00249473	0.0187084	3.02398	CyPs
TTC39B	0.497667	0.00251658	0.018862	3.02134	CyPs
RPS23	0.474078	0.00252575	0.0189101	3.02024	CyPs
VAT1L	0.488391	0.00253267	0.0189516	3.01941	CyPs
DPP10	0.266755	0.00254149	0.0190031	3.01836	CyPs
TAF3	0.404816	0.00254232	0.0190031	3.01826	CyPs
USPL1	0.614335	0.00254948	0.0190462	3.01741	CyPs
IMMP1L	0.451826	0.00256061	0.019119	3.01609	CyPs
PIGU	0.428256	0.00259565	0.0193544	3.01196	CyPs
RUVBL2	1.49053	0.00259755	0.0193544	3.01174	CyPs
RDH10	1.14654	0.00259777	0.0193544	3.01171	CyPs
INIP	0.899434	0.00262069	0.019504	3.00905	CyPs
TTPA	1.24451	0.00266216	0.0197913	3.00427	CyPs
RABGAP1	0.359278	0.00267542	0.0198791	3.00276	CyPs
IVNS1ABP	0.580561	0.0026838	0.0199306	3.00181	CyPs
ZNF782	0.471832	0.00269555	0.0200071	3.00048	CyPs
SLC2A4RG	1.90361	0.00269961	0.0200168	3.00002	CyPs
M6PR	0.703352	0.00269977	0.0200168	3	CyPs
CDCA5	5.58552	0.00271948	0.020152	2.99779	CyPs
PPP2CB	0.447743	0.00273253	0.0202378	2.99633	CyPs
SIK2	0.379414	0.00273626	0.0202545	2.99591	CyPs
ATP11B	0.39321	0.00274575	0.0203138	2.99486	CyPs
NFKB1	0.397616	0.00275539	0.0203742	2.99379	CyPs
CWF19L1	0.766756	0.00275783	0.0203813	2.99352	CyPs
DENND1A	0.375844	0.00277435	0.0204923	2.99169	CyPs
RARS2	0.37872	0.00277726	0.0205028	2.99137	CyPs
NFXL1	0.566147	0.00279001	0.0205859	2.98997	CyPs
USP10	0.379345	0.00280748	0.0207037	2.98807	CyPs
DLGAP5	5.35094	0.00281429	0.0207321	2.98733	CyPs
ATN1	0.529652	0.00281435	0.0207321	2.98732	CyPs
MLEC	0.516472	0.0028169	0.0207345	2.98704	CyPs
KCTD20	0.572135	0.00282059	0.0207447	2.98664	CyPs
EPB41	0.981266	0.0028299	0.0208021	2.98563	CyPs
PDK1	0.9912	0.00283782	0.0208491	2.98478	CyPs
RAB23	1.56661	0.00285031	0.0209259	2.98344	CyPs
IDH2	0.579548	0.00285131	0.0209259	2.98333	CyPs
UBXN2A	0.525239	0.00285885	0.02097	2.98252	CyPs
BORA	2.20543	0.00286065	0.0209704	2.98233	CyPs
ZFP91	0.917701	0.00286195	0.0209704	2.98219	CyPs
ZNF124	0.644479	0.002868	0.0210034	2.98154	CyPs
DESI2	0.571295	0.00287051	0.0210106	2.98128	CyPs
ABCA3	0.500852	0.00287792	0.0210537	2.98049	CyPs
UNG	1.18249	0.00289047	0.0211166	2.97915	CyPs
PPDPF	0.823008	0.00289191	0.0211166	2.979	CyPs
PAK4	1.26967	0.00289267	0.0211166	2.97892	CyPs
SUMF2	0.76287	0.00289674	0.0211351	2.97849	CyPs
RPLP2	0.416745	0.00290102	0.0211552	2.97804	CyPs
SPDL1	1.42637	0.00291943	0.0212781	2.9761	CyPs
ATXN7	0.459207	0.00293018	0.0213451	2.97497	CyPs
CFLAR	0.472584	0.00294787	0.0214513	2.97312	CyPs
NOP58	0.551953	0.00297125	0.0215985	2.9707	CyPs
TMEM117	0.380365	0.0030154	0.0219079	2.96616	CyPs
ITGA7	1.13451	0.00302723	0.0219822	2.96496	CyPs
ZNF398	0.663769	0.00304175	0.022076	2.96349	CyPs
SMAD9	1.83162	0.00308759	0.0223851	2.95888	CyPs
SUCLG2	0.353222	0.00309414	0.0224207	2.95823	CyPs
SRSF3	0.492504	0.003116	0.0225672	2.95606	CyPs
RAD51	3.91563	0.00316868	0.02291	2.95088	CyPs
RNF145	0.384814	0.00316999	0.02291	2.95075	CyPs
MVD	0.843814	0.00319289	0.0230633	2.94853	CyPs
CLPB	0.74928	0.00323419	0.0233493	2.94456	CyPs
SEC61A1	0.561563	0.00325948	0.0235196	2.94214	CyPs
SERAC1	0.926484	0.00330059	0.0237663	2.93826	CyPs
AKAP10	0.361597	0.00332576	0.023935	2.93591	CyPs
PHF10	0.613125	0.00333377	0.0239676	2.93516	CyPs
NT5DC2	1.89301	0.00333586	0.0239701	2.93496	CyPs
MAPK4	0.841164	0.00334459	0.0240202	2.93415	CyPs
SRP19	0.511781	0.00336748	0.0241662	2.93204	CyPs
SQLE	0.434772	0.00336842	0.0241662	2.93195	CyPs
CDCA4	3.64634	0.00338014	0.0242376	2.93087	CyPs
MYO9B	0.343633	0.00338879	0.024287	2.93008	CyPs
SSH1	0.745403	0.00339719	0.0243165	2.92931	CyPs
KCMF1	0.440066	0.00339782	0.0243165	2.92925	CyPs
ESD	0.674608	0.00339822	0.0243165	2.92921	CyPs
UBE3C	0.341183	0.00340787	0.0243728	2.92833	CyPs
ECHDC1	0.410456	0.00341986	0.0244406	2.92724	CyPs
ZNF273	0.754659	0.0034209	0.0244406	2.92714	CyPs
TNFRSF10B	0.967766	0.00343568	0.0245335	2.9258	CyPs
ELMOD2	0.650979	0.00344097	0.0245585	2.92532	CyPs
NCK1	0.472799	0.00344421	0.0245688	2.92503	CyPs
PPP4R2	0.434591	0.00345015	0.0245984	2.9245	CyPs
PDLIM3	1.09847	0.00346289	0.0246764	2.92335	CyPs
FBLN1	3.44183	0.00348483	0.0248071	2.92138	CyPs
UBTF	0.914202	0.00350339	0.0249134	2.91973	CyPs
PFKL	0.611176	0.00352049	0.0250221	2.91821	CyPs
ACTR3	0.395464	0.00352779	0.025061	2.91756	CyPs
RNF34	0.570154	0.00354009	0.0251353	2.91648	CyPs
RASSF8	0.466485	0.00356728	0.0253023	2.91409	CyPs
MAP4K4	0.368114	0.00359206	0.0254649	2.91193	CyPs
RCAN2	0.407753	0.0035978	0.0254925	2.91143	CyPs
ADAM10	0.345665	0.00360184	0.0255079	2.91108	CyPs
RTF1	0.43797	0.00360815	0.0255395	2.91053	CyPs
SLC16A4	1.33614	0.00361241	0.0255565	2.91016	CyPs
CCT5	0.606842	0.00362702	0.0256466	2.9089	CyPs
HCFC2	0.417479	0.00363114	0.0256626	2.90855	CyPs
MLLT10	0.334991	0.00366095	0.02586	2.90599	CyPs
HIPK3	0.434451	0.0036698	0.0259092	2.90523	CyPs
RNF24	0.377783	0.00368303	0.0259892	2.90411	CyPs
PUS7	0.784103	0.00368573	0.0259949	2.90388	CyPs
AIM2	2.57589	0.00370185	0.0260818	2.90251	CyPs
CEP41	0.920858	0.00372514	0.0262324	2.90055	CyPs
C2orf69	0.799655	0.00374883	0.0263744	2.89856	CyPs
PLEKHA1	0.427071	0.00374913	0.0263744	2.89853	CyPs
NELFB	0.915749	0.0037896	0.0266454	2.89516	CyPs
AGPAT3	0.478795	0.00379704	0.0266841	2.89455	CyPs
SART3	0.567571	0.00380186	0.0267043	2.89415	CyPs
ARHGAP21	0.309829	0.00380563	0.0267172	2.89384	CyPs
CMTM6	0.76892	0.00384021	0.0269462	2.891	CyPs
PNPT1	0.388061	0.00384295	0.0269517	2.89077	CyPs
PHLPP2	0.644113	0.003845	0.0269522	2.89061	CyPs
RMI2	3.19493	0.00386161	0.0270429	2.88925	CyPs
LRRC8B	0.411402	0.00386187	0.0270429	2.88923	CyPs
SHQ1	0.945949	0.00388304	0.0271773	2.88751	CyPs
CCNT1	0.766436	0.00390298	0.0272891	2.8859	CyPs
SSR3	0.6894	0.00394177	0.0275183	2.88278	CyPs
PTPN9	0.409269	0.00396426	0.0276613	2.88099	CyPs
SMARCAD1	0.337251	0.00399278	0.0278461	2.87873	CyPs
MUS81	1.04963	0.00400105	0.0278897	2.87808	CyPs
FAM107B	0.995342	0.00400462	0.0279004	2.8778	CyPs
PPP2R3C	0.457817	0.00400939	0.0279195	2.87742	CyPs
POLR1A	0.600521	0.00401361	0.0279347	2.87709	CyPs
CDCA3	4.02087	0.00403627	0.0280782	2.87531	CyPs
ZZEF1	0.36506	0.00406558	0.0282678	2.87303	CyPs
NLRC5	0.873263	0.00408439	0.0283842	2.87157	CyPs
CLMN	0.930484	0.00411595	0.0285747	2.86914	CyPs
RPTOR	0.342851	0.00416048	0.0288547	2.86573	CyPs
SFT2D2	0.719839	0.00420146	0.0291242	2.86263	CyPs
SH3RF3	0.415501	0.0042152	0.0291982	2.86159	CyPs
FBN2	0.965823	0.0042195	0.029205	2.86127	CyPs
HDAC7	0.723713	0.00422395	0.0292211	2.86093	CyPs
RCAN1	0.594163	0.00423122	0.0292567	2.86039	CyPs
HNRNPUL2	0.937666	0.00427326	0.0295029	2.85725	CyPs
PTBP3	0.404858	0.00427665	0.0295115	2.857	CyPs
FKBP10	0.742619	0.00428159	0.0295307	2.85663	CyPs
TPI1	0.633166	0.0043169	0.0297593	2.85403	CyPs
CDC123	0.559753	0.00435507	0.0300074	2.85123	CyPs
PLEKHO1	1.10699	0.00438932	0.0302282	2.84874	CyPs
PIP5K1C	0.92608	0.00439782	0.0302621	2.84812	CyPs
ANXA2	1.797	0.00439963	0.0302621	2.84799	CyPs
TMEM62	0.589611	0.00440279	0.0302621	2.84776	CyPs
RAP1GDS1	0.355711	0.00440305	0.0302621	2.84774	CyPs
AURKB	7.98079	0.0044331	0.030449	2.84558	CyPs
OCIAD2	1.75655	0.00443467	0.030449	2.84546	CyPs
ANKRD13D	0.638243	0.00443706	0.0304502	2.84529	CyPs
RAB28	0.37243	0.00447127	0.0306464	2.84285	CyPs
CAMK4	0.429401	0.00447233	0.0306464	2.84277	CyPs
ITGA4	1.15511	0.00447523	0.030651	2.84256	CyPs
PRUNE2	0.354858	0.0044871	0.030717	2.84172	CyPs
CCT4	0.455772	0.00451703	0.0308911	2.8396	CyPs
HFM1	0.370818	0.00452933	0.030956	2.83873	CyPs
CBX3	0.520777	0.00453102	0.030956	2.83861	CyPs
NCAPH2	1.68653	0.00455096	0.0310767	2.83721	CyPs
DCTN2	0.48801	0.00455762	0.0311068	2.83674	CyPs
COL15A1	1.12705	0.00458531	0.0312803	2.83481	CyPs
MFSD6	0.425138	0.00459732	0.0313466	2.83397	CyPs
ATP2A2	0.342367	0.00462348	0.0315093	2.83216	CyPs
SCAF4	0.478565	0.00463372	0.0315628	2.83145	CyPs
CCNY	0.341522	0.00463591	0.0315628	2.8313	CyPs
SF3A2	1.34819	0.00464408	0.0315945	2.83074	CyPs
PBX4	2.09547	0.00464684	0.0315945	2.83055	CyPs
ST7L	0.400224	0.00464747	0.0315945	2.8305	CyPs
DHX57	0.477372	0.0046528	0.0316151	2.83014	CyPs
DNASE1	0.445686	0.00466123	0.0316567	2.82956	CyPs
ZNF587	0.636351	0.00466854	0.0316907	2.82906	CyPs
CLTCL1	0.626186	0.00467449	0.0317155	2.82865	CyPs
SMG5	0.598286	0.00468235	0.0317375	2.82811	CyPs
VEGFB	0.685763	0.00468895	0.0317666	2.82766	CyPs
SLC4A4	0.661583	0.00470124	0.0318341	2.82682	CyPs
ABCB10	0.594227	0.00473419	0.0320257	2.82459	CyPs
XPNPEP1	0.464894	0.00473923	0.0320298	2.82424	CyPs
RNF180	0.333304	0.00473947	0.0320298	2.82423	CyPs
ZNF814	0.42488	0.00475761	0.0321367	2.823	CyPs
HSDL2	0.574677	0.00477132	0.0322135	2.82208	CyPs
FAF2	0.51993	0.00482714	0.0325743	2.81835	CyPs
ARL17A	0.603635	0.00488105	0.0329096	2.81478	CyPs
GBF1	0.328331	0.00490709	0.0330651	2.81307	CyPs
ERCC8	0.411775	0.00491678	0.033098	2.81244	CyPs
RAD9A	0.566143	0.00492088	0.0331093	2.81217	CyPs
ZBTB8A	0.696778	0.00493877	0.0332135	2.811	CyPs
NR2C2	0.406858	0.0049439	0.0332317	2.81067	CyPs
GNG2	0.39827	0.00496173	0.0333226	2.80951	CyPs
MSANTD2	0.546004	0.00496226	0.0333226	2.80947	CyPs
SEC22C	0.750926	0.00507005	0.0340297	2.80255	CyPs
PARG	0.381117	0.00507408	0.0340402	2.80229	CyPs
CHN1	0.324444	0.00509946	0.0341937	2.80068	CyPs
TNPO2	0.522093	0.00510738	0.0342302	2.80018	CyPs
NCS1	0.810285	0.00511253	0.034248	2.79986	CyPs
ATF6	0.358797	0.00514344	0.0344177	2.79791	CyPs
EIF4B	0.435979	0.00514464	0.0344177	2.79783	CyPs
ANKRD11	0.313166	0.00514537	0.0344177	2.79779	CyPs
DDX55	0.820806	0.00515936	0.0344777	2.79691	CyPs
MOV10	0.584219	0.00519287	0.0346848	2.79482	CyPs
CDCA7	5.55244	0.00521225	0.0347973	2.79361	CyPs
TSEN54	0.917438	0.00525559	0.0350694	2.79094	CyPs
WWC1	0.7134	0.00525812	0.0350694	2.79078	CyPs
ERP44	0.359825	0.00526414	0.0350926	2.79041	CyPs
RGS12	0.355363	0.00527383	0.0351401	2.78981	CyPs
SMIM8	0.516462	0.00529562	0.0352682	2.78848	CyPs
UMPS	0.637236	0.00530315	0.0353012	2.78802	CyPs
STX8	0.354804	0.00531902	0.0353876	2.78705	CyPs
CHD8	0.374957	0.00532128	0.0353876	2.78691	CyPs
EPHA6	0.751387	0.00535574	0.0355965	2.78482	CyPs
GUCY1A2	0.340965	0.00535915	0.0355965	2.78461	CyPs
RPS6KB1	0.461491	0.00536051	0.0355965	2.78453	CyPs
RAB3GAP2	0.332044	0.00536842	0.035615	2.78405	CyPs
SNX19	0.441488	0.00540278	0.0358257	2.78198	CyPs
RPL23	0.548966	0.0054103	0.0358582	2.78153	CyPs
ING3	0.735581	0.00542995	0.0359692	2.78036	CyPs
RBX1	0.448102	0.00543228	0.0359692	2.78022	CyPs
TRNT1	0.620309	0.00545123	0.0360774	2.77908	CyPs
SRP9	0.504703	0.00546166	0.0361289	2.77846	CyPs
ZBTB25	0.463855	0.00550143	0.0363746	2.77611	CyPs
PSMG2	0.426618	0.00553784	0.0365977	2.77396	CyPs
CAD	1.30524	0.00556237	0.0367421	2.77252	CyPs
GRIA4	0.317402	0.0056032	0.0369763	2.77014	CyPs
CCDC30	0.629284	0.00562874	0.037127	2.76866	CyPs
SNX10	0.829249	0.00563183	0.0371295	2.76848	CyPs
ATG12	0.489505	0.00565014	0.0372324	2.76742	CyPs
NIPA2	0.943351	0.00565649	0.0372524	2.76706	CyPs
GTF2A1	0.474698	0.0056586	0.0372524	2.76694	CyPs
CTNND1	0.325814	0.00570651	0.0375499	2.76419	CyPs
ENOPH1	0.635587	0.00572146	0.0376303	2.76333	CyPs
FBXO4	0.984729	0.00572443	0.0376318	2.76316	CyPs
SYMPK	0.423505	0.00573054	0.0376539	2.76281	CyPs
TRAF2	1.65389	0.00574632	0.037739	2.76192	CyPs
MAN1C1	0.763085	0.00574898	0.037739	2.76177	CyPs
PTDSS1	0.681572	0.00576917	0.0378534	2.76062	CyPs
SSB	0.472085	0.00579453	0.0380017	2.75919	CyPs
TMEM167A	0.354876	0.00580697	0.0380651	2.75849	CyPs
GAB2	0.36522	0.00581731	0.0381148	2.75791	CyPs
ABHD17C	1.21597	0.00587802	0.0384621	2.75451	CyPs
TSEN15	0.379511	0.00587872	0.0384621	2.75447	CyPs
COMMD10	0.359281	0.00591845	0.0387036	2.75227	CyPs
RAB7A	0.326807	0.00593358	0.0387841	2.75143	CyPs
DIP2A	0.332503	0.00594981	0.0388717	2.75053	CyPs
FBXW2	0.488706	0.00602551	0.0393223	2.74639	CyPs
RANBP1	0.984428	0.0060258	0.0393223	2.74637	CyPs
ODC1	1.52149	0.00602765	0.0393223	2.74627	CyPs
ZHX3	0.318745	0.00603022	0.0393223	2.74613	CyPs
CNPY3	1.46522	0.00603923	0.0393624	2.74564	CyPs
MCUR1	1.15592	0.00607413	0.0395711	2.74375	CyPs
PIGX	0.692252	0.0060993	0.0397163	2.74239	CyPs
AAGAB	0.577409	0.00610513	0.0397354	2.74208	CyPs
LRP12	0.34506	0.00611646	0.0397903	2.74147	CyPs
COQ2	2.19226	0.00613144	0.0398689	2.74067	CyPs
XXYLT1	0.492036	0.00617494	0.0400948	2.73834	CyPs
SLC44A2	0.553192	0.00618449	0.0401321	2.73784	CyPs
INO80E	1.12036	0.00618652	0.0401321	2.73773	CyPs
SYNC	0.546824	0.00619833	0.0401897	2.7371	CyPs
SERPINB6	0.399207	0.00620536	0.0402145	2.73673	CyPs
CCDC148	0.868596	0.006208	0.0402145	2.73659	CyPs
DYRK4	1.2006	0.00622244	0.0402891	2.73582	CyPs
PDCD11	0.72645	0.00624465	0.0404138	2.73465	CyPs
TOX2	0.416063	0.0062573	0.0404593	2.73398	CyPs
DMC1	3.29435	0.00625756	0.0404593	2.73397	CyPs
LRRC36	3.307	0.00631339	0.0408011	2.73104	CyPs
SORT1	0.334363	0.0063406	0.0409576	2.72963	CyPs
NUP37	1.03034	0.00639004	0.0412576	2.72707	CyPs
SLC38A2	0.345652	0.00640509	0.0413354	2.72629	CyPs
WDR33	0.344771	0.00640816	0.0413358	2.72613	CyPs
TRAF3IP1	0.571968	0.00642405	0.0414188	2.72531	CyPs
N4BP1	0.375452	0.00644251	0.0415142	2.72437	CyPs
SNRNP200	0.448937	0.00647412	0.041683	2.72275	CyPs
DIS3	0.547405	0.00648957	0.0417629	2.72196	CyPs
CHFR	0.471646	0.00650938	0.0418708	2.72095	CyPs
CSNK2A2	0.525959	0.00653504	0.0420162	2.71965	CyPs
CACYBP	0.619587	0.00659884	0.0423868	2.71644	CyPs
HES6	0.80935	0.00669148	0.0429618	2.71182	CyPs
LARP7	0.496605	0.00670712	0.0430138	2.71105	CyPs
CEP350	0.318492	0.00670772	0.0430138	2.71102	CyPs
ZNF75A	0.488338	0.00670898	0.0430138	2.71095	CyPs
HS3ST5	1.40679	0.00672298	0.0430835	2.71026	CyPs
DPYSL3	0.338188	0.00679311	0.0435126	2.70682	CyPs
CCND2	0.431832	0.00685535	0.0438704	2.70379	CyPs
MRPS16	0.646452	0.00688043	0.0440104	2.70258	CyPs
ELP4	0.327628	0.00690226	0.0440885	2.70152	CyPs
POLG	0.740733	0.00700666	0.0447138	2.69653	CyPs
PMS2	0.881094	0.00706385	0.0450579	2.69382	CyPs
LARP1	0.359989	0.00709619	0.0452431	2.6923	CyPs
SH3PXD2A	1.09481	0.00710087	0.045252	2.69208	CyPs
NCOA7	0.401896	0.00712249	0.0453688	2.69106	CyPs
PHC1	0.604425	0.00719562	0.0457709	2.68765	CyPs
SETD7	0.423805	0.00724436	0.0460597	2.6854	CyPs
WDR37	0.354882	0.00726862	0.0461925	2.68428	CyPs
NUDT5	0.559317	0.00727455	0.0462088	2.68401	CyPs
LETMD1	0.548733	0.00730174	0.0463602	2.68276	CyPs
COMMD1	0.339161	0.00730659	0.0463695	2.68254	CyPs
EYA3	0.363088	0.00736407	0.0466898	2.67992	CyPs
GRIK2	0.244395	0.00736724	0.0466898	2.67977	CyPs
SPP1	0.474766	0.00738045	0.0467304	2.67917	CyPs
PPM1G	0.605977	0.00741555	0.0469094	2.67758	CyPs
SIL1	0.311428	0.00743148	0.0469886	2.67686	CyPs
GLO1	0.420795	0.00744678	0.0470637	2.67617	CyPs
PRR12	0.620789	0.00748411	0.0472778	2.6745	CyPs
SPATA33	2.26521	0.00751268	0.047393	2.67322	CyPs
LCOR	0.334284	0.00751883	0.04741	2.67295	CyPs
HINT1	0.430401	0.00752289	0.0474139	2.67277	CyPs
INHBA	0.68135	0.00754747	0.0475404	2.67167	CyPs
SUMO3	1.43505	0.00754989	0.0475404	2.67156	CyPs
RPL13A	0.360939	0.00758664	0.04775	2.66993	CyPs
UBE2E3	0.345542	0.00760259	0.0478285	2.66923	CyPs
TFG	0.340329	0.00764228	0.0480342	2.66748	CyPs
CEP120	0.521374	0.00764681	0.0480407	2.66728	CyPs
IST1	0.376187	0.00770411	0.0483786	2.66477	CyPs
CXXC5	0.475403	0.00770946	0.0483901	2.66454	CyPs
ELAVL3	0.35616	0.00779109	0.0488578	2.66099	CyPs
AUTS2	0.34122	0.00780233	0.048906	2.66051	CyPs
OVOL2	1.19059	0.00781417	0.0489579	2.66	CyPs
ZCCHC4	0.690168	0.00782118	0.0489795	2.65969	CyPs
PFN1	0.869038	0.00783001	0.0490124	2.65931	CyPs
KCNC1	0.590069	0.00787686	0.0492608	2.6573	CyPs
PAQR3	0.668853	0.00788634	0.0492977	2.6569	CyPs
PPRC1	1.13784	0.00793575	0.049584	2.65479	CyPs
CTNNBL1	0.497143	0.00796478	0.0497296	2.65356	CyPs
SYPL1	0.959887	0.00796629	0.0497296	2.6535	CyPs
RPA3	0.882962	0.00797429	0.049757	2.65316	CyPs
IFRD1	0.603428	0.00797819	0.0497587	2.65299	CyPs
PIP5K1A	0.354156	0.00805586	0.0501748	2.64972	CyPs
PITHD1	0.906309	0.00808528	0.0503353	2.64849	CyPs
RBMS1	0.318778	0.00810008	0.0504046	2.64787	CyPs
WASF2	0.399086	0.00812541	0.0505393	2.64681	CyPs
ERCC3	0.525177	0.00813008	0.0505455	2.64662	CyPs
CMPK1	0.492433	0.00814959	0.0506439	2.64581	CyPs
CDK11B	0.898674	0.00816355	0.0507077	2.64523	CyPs
UQCC1	0.362574	0.00817467	0.0507538	2.64477	CyPs
SLC25A16	0.403323	0.00818097	0.05077	2.64451	CyPs
SMAD1	0.375318	0.00822002	0.0509774	2.6429	CyPs
AKAP13	0.325792	0.0082218	0.0509774	2.64282	CyPs
HMGA2	1.69326	0.00827052	0.0512433	2.64082	CyPs
USP45	0.442299	0.00827214	0.0512433	2.64076	CyPs
HEXB	0.655771	0.0082915	0.0513378	2.63996	CyPs
CKS2	4.47279	0.00829487	0.0513378	2.63983	CyPs
ZNF445	0.467409	0.00833069	0.0515363	2.63837	CyPs
NSMCE4A	0.918648	0.00833722	0.0515535	2.6381	CyPs
TMEM123	0.466584	0.00836546	0.0517049	2.63695	CyPs
HNRNPM	0.280386	0.00839028	0.051835	2.63595	CyPs
AK5	0.452053	0.008435	0.0520258	2.63414	CyPs
AFG3L2	0.430496	0.00843557	0.0520258	2.63412	CyPs
SMARCA2	0.339933	0.00843631	0.0520258	2.63409	CyPs
SLC35G1	0.799498	0.00845989	0.0521478	2.63314	CyPs
CBX6	0.633659	0.00851463	0.0524617	2.63095	CyPs
TFR2	2.69662	0.00851997	0.0524711	2.63074	CyPs
ADAM17	0.380462	0.0085345	0.0525371	2.63016	CyPs
DNAH6	1.69797	0.00857511	0.0527398	2.62854	CyPs
CAND2	0.727771	0.00857898	0.05274	2.62839	CyPs
PSME4	0.322269	0.00860628	0.0528842	2.62731	CyPs
DBF4B	1.14756	0.00865348	0.0531267	2.62545	CyPs
ARRB2	1.01888	0.00868981	0.0533259	2.62402	CyPs
GPR180	0.452741	0.00874505	0.053641	2.62186	CyPs
C6orf62	0.366947	0.00880173	0.0539405	2.61966	CyPs
BMPR1A	0.331885	0.0088404	0.0541292	2.61817	CyPs
UBTD2	0.50371	0.00887266	0.0542784	2.61692	CyPs
RPS29	0.348435	0.00891297	0.0545008	2.61537	CyPs
LIMCH1	0.461875	0.00893942	0.0546382	2.61436	CyPs
FAM174B	0.712884	0.00894853	0.0546696	2.61401	CyPs
LARS2	0.465211	0.00900368	0.0549332	2.61191	CyPs
FAM76B	0.624023	0.00901442	0.0549743	2.61151	CyPs
DBI	0.319151	0.00902891	0.0550383	2.61096	CyPs
SNRPG	0.877286	0.00905355	0.055164	2.61003	CyPs
OXR1	0.34711	0.00906264	0.055195	2.60968	CyPs
FEM1C	0.36398	0.00908486	0.0553058	2.60884	CyPs
VGF	1.656	0.00909399	0.0553331	2.6085	CyPs
CHUK	0.662675	0.00912061	0.0554497	2.6075	CyPs
ZNF551	0.8524	0.0091937	0.0558694	2.60477	CyPs
NSD1	0.331035	0.00919991	0.0558824	2.60453	CyPs
TBCA	0.31451	0.00921295	0.0559312	2.60405	CyPs
KLF7	0.366166	0.00921781	0.0559312	2.60387	CyPs
SPAG1	1.29436	0.0092376	0.0560124	2.60313	CyPs
MYRIP	0.359952	0.00927994	0.0562349	2.60157	CyPs
CEBPZ	0.352048	0.00928248	0.0562349	2.60147	CyPs
PPP6C	0.466027	0.00929861	0.0563078	2.60088	CyPs
ESRRA	0.911701	0.00930674	0.0563322	2.60058	CyPs
ZNF486	1.81968	0.00934513	0.0565397	2.59916	CyPs
TOM1L1	0.415299	0.00935935	0.0565759	2.59864	CyPs
TMEM168	0.294571	0.00945303	0.0570669	2.59522	CyPs
MTHFD2	1.021	0.00947074	0.0571487	2.59458	CyPs
TRIM44	0.31254	0.00948488	0.0572089	2.59406	CyPs
PPP4C	1.01346	0.00952938	0.0574521	2.59245	CyPs
CEP290	0.306695	0.00954284	0.057508	2.59197	CyPs
TNFRSF1A	0.526852	0.00955186	0.0575372	2.59164	CyPs
CYP46A1	0.501346	0.0095712	0.0576284	2.59095	CyPs
KATNBL1	0.320262	0.00957808	0.0576446	2.5907	CyPs
INPP5B	0.556188	0.00958771	0.0576773	2.59035	CyPs
GRB2	0.436713	0.00961024	0.0577876	2.58955	CyPs
CALR	0.428833	0.00961932	0.0578169	2.58922	CyPs
SHOC2	0.294624	0.00966149	0.058045	2.58771	CyPs
RNF138	0.686108	0.00970228	0.0582137	2.58626	CyPs
SV2A	0.353067	0.00971744	0.0582792	2.58573	CyPs
MAD2L1	3.88794	0.00976998	0.0585687	2.58387	CyPs
TRIP4	0.723807	0.0097901	0.0586638	2.58316	CyPs
TRAF3	0.411204	0.00980148	0.0587064	2.58276	CyPs
PSPC1	0.322992	0.00981769	0.0587745	2.58219	CyPs
SPEN	0.308685	0.00984064	0.058864	2.58138	CyPs
PRKRIP1	0.320393	0.00992668	0.0593528	2.57837	CyPs
KLC1	0.32983	0.00995553	0.0594995	2.57737	CyPs
RAD23B	0.289212	0.0100184	0.0598494	2.57519	CyPs
TIAM2	0.312873	0.0100389	0.0599458	2.57449	CyPs
CEP55	5.18198	0.0100622	0.0600584	2.57369	CyPs
AFF1	0.283852	0.0100803	0.0601404	2.57306	CyPs
CNTROB	1.45454	0.0100922	0.0601754	2.57266	CyPs
RBM17	0.414652	0.0100949	0.0601754	2.57256	CyPs
TPP2	0.312325	0.0101347	0.0603865	2.5712	CyPs
ACLY	0.508911	0.0101418	0.0604026	2.57096	CyPs
EIF4A2	0.263597	0.0102484	0.0609849	2.56733	CyPs
CD151	1.31378	0.0102642	0.061052	2.5668	CyPs
CAMK2B	0.424376	0.0102728	0.0610743	2.56651	CyPs
DOCK7	0.427939	0.0102773	0.0610743	2.56636	CyPs
ROCK1	0.306581	0.0102917	0.06111	2.56587	CyPs
ALG8	0.63194	0.0103038	0.0611555	2.56546	CyPs
ITFG1	0.316315	0.0103265	0.0612428	2.5647	CyPs
METTL2B	0.597061	0.0103446	0.0613182	2.56409	CyPs
CBFA2T2	0.317521	0.0103503	0.0613254	2.5639	CyPs
TMTC3	0.464619	0.0103822	0.0614616	2.56283	CyPs
USP25	0.312292	0.0103982	0.0615104	2.5623	CyPs
CRISPLD1	0.441466	0.0103994	0.0615104	2.56226	CyPs
CCDC144A	0.351173	0.0104379	0.061677	2.56097	CyPs
ARHGEF39	4.70983	0.0104395	0.061677	2.56092	CyPs
KCNMB4	0.521952	0.010441	0.061677	2.56087	CyPs
C4orf46	2.80372	0.0104764	0.0618347	2.5597	CyPs
TMEM39B	1.02131	0.0104767	0.0618347	2.55968	CyPs
USP12	0.457282	0.0104842	0.0618526	2.55943	CyPs
CPSF7	0.376922	0.0104889	0.0618537	2.55928	CyPs
RPL27A	0.416792	0.0105174	0.0619952	2.55834	CyPs
B4GALNT1	1.90794	0.0105296	0.0620401	2.55794	CyPs
WIPF2	0.360369	0.0106058	0.0624164	2.55543	CyPs
ANAPC7	0.502863	0.0106071	0.0624164	2.55538	CyPs
GPR176	0.391423	0.0106198	0.0624644	2.55497	CyPs
TAPT1	0.324803	0.0106367	0.0625347	2.55441	CyPs
PI4KA	0.327752	0.0106408	0.0625347	2.55428	CyPs
ARID2	0.314607	0.0106954	0.0628285	2.5525	CyPs
PLEKHB2	0.605973	0.0107288	0.062998	2.55141	CyPs
QSOX2	1.19492	0.0107576	0.0631401	2.55048	CyPs
CSDE1	0.271766	0.0107763	0.0632227	2.54987	CyPs
TMEM30A	0.316491	0.0108614	0.0636892	2.54713	CyPs
POP5	1.14127	0.0108697	0.0636892	2.54686	CyPs
CWF19L2	0.32805	0.01089	0.0637813	2.54621	CyPs
KIFAP3	0.30067	0.0109051	0.0638424	2.54572	CyPs
GSTT2B	0.901437	0.0109422	0.0640323	2.54454	CyPs
P2RY14	0.62121	0.010968	0.0641559	2.54372	CyPs
[truncated: 94,223 more rows]

## Sheet: MC_SC_Oligos_Activation_States
gene	logfoldchanges	pvals	pvals_adj	scores	cluster
DST	0.337059	0	0	102.831	Homeostatic_Oligos
MACF1	0.472156	0	0	99.8775	Homeostatic_Oligos
RNF220	0.355554	0	0	95.2724	Homeostatic_Oligos
PRUNE2	0.411524	0	0	92.7564	Homeostatic_Oligos
OTUD7A	0.459989	0	0	89.5676	Homeostatic_Oligos
ELMO1	0.311144	0	0	86.201	Homeostatic_Oligos
PRKCA	0.688436	0	0	85.3508	Homeostatic_Oligos
ACSBG1	1.15794	0	0	80.4773	Homeostatic_Oligos
NAV2	0.687891	0	0	80.2295	Homeostatic_Oligos
CNTNAP4	0.634887	0	0	74.1246	Homeostatic_Oligos
DTNA	0.572525	0	0	73.6633	Homeostatic_Oligos
SLC22A23	0.453307	0	0	73.6115	Homeostatic_Oligos
DOCK1	0.359586	0	0	71.5923	Homeostatic_Oligos
DOCK5	0.318868	0	0	71.5087	Homeostatic_Oligos
AGAP1	0.255703	0	0	70.0364	Homeostatic_Oligos
LSS	0.536413	0	0	69.3413	Homeostatic_Oligos
GNA14	1.02188	0	0	67.9897	Homeostatic_Oligos
PCSK6	0.413323	0	0	67.382	Homeostatic_Oligos
DOCK10	0.251614	0	0	67.1806	Homeostatic_Oligos
SREBF2	0.491225	0	0	66.6619	Homeostatic_Oligos
LRP1B	0.416544	0	0	66.549	Homeostatic_Oligos
GPHN	0.337899	0	0	66.3146	Homeostatic_Oligos
DOCK3	0.316623	0	0	65.7211	Homeostatic_Oligos
DPYD	0.295841	0	0	65.554	Homeostatic_Oligos
SNX29	0.412163	0	0	63.9664	Homeostatic_Oligos
DSCAML1	0.324219	0	0	62.6688	Homeostatic_Oligos
ACTN2	0.707156	0	0	62.6048	Homeostatic_Oligos
ANKRD36C	0.441506	0	0	62.4965	Homeostatic_Oligos
RASGRF1	0.724528	0	0	61.8252	Homeostatic_Oligos
WWOX	0.372789	0	0	61.0144	Homeostatic_Oligos
PDE4D	0.48119	0	0	61.0121	Homeostatic_Oligos
ELF2	0.35749	0	0	60.7646	Homeostatic_Oligos
TANC1	0.435369	0	0	60.455	Homeostatic_Oligos
MAN2A1	0.28211	0	0	59.5815	Homeostatic_Oligos
PHACTR1	0.55863	0	0	59.4345	Homeostatic_Oligos
ST6GALNAC3	0.36623	0	0	59.0743	Homeostatic_Oligos
NTM	0.315592	0	0	58.8996	Homeostatic_Oligos
ARHGAP21	0.235455	0	0	58.7558	Homeostatic_Oligos
TMTC2	0.26406	0	0	58.2876	Homeostatic_Oligos
KIRREL3	0.369147	0	0	57.3257	Homeostatic_Oligos
GNG7	0.400643	0	0	57.3236	Homeostatic_Oligos
NPAS3	0.2463	0	0	57.2602	Homeostatic_Oligos
BPTF	0.324705	0	0	56.755	Homeostatic_Oligos
SSH2	0.27541	0	0	55.7798	Homeostatic_Oligos
ZDHHC20	0.36268	0	0	55.4856	Homeostatic_Oligos
SPIDR	0.514553	0	0	55.4114	Homeostatic_Oligos
SAMD4A	0.779884	0	0	54.9836	Homeostatic_Oligos
NCKAP5	0.27344	0	0	54.7466	Homeostatic_Oligos
MSI2	0.452887	0	0	54.7421	Homeostatic_Oligos
BAZ2B	0.262148	0	0	54.6543	Homeostatic_Oligos
SCAPER	0.341589	0	0	54.4628	Homeostatic_Oligos
INPP5F	0.787264	0	0	53.7121	Homeostatic_Oligos
MYO9B	0.411539	0	0	53.6905	Homeostatic_Oligos
MICAL3	0.327461	0	0	53.473	Homeostatic_Oligos
NALCN	0.25985	0	0	53.4039	Homeostatic_Oligos
ASH1L	0.29629	0	0	53.2037	Homeostatic_Oligos
RBFOX1	0.615262	0	0	52.8832	Homeostatic_Oligos
DNM3	0.187425	0	0	52.7456	Homeostatic_Oligos
MYO1E	0.314778	0	0	52.7444	Homeostatic_Oligos
TANC2	0.353539	0	0	52.4512	Homeostatic_Oligos
MAP4	0.37673	0	0	51.9386	Homeostatic_Oligos
SYNJ2	0.270472	0	0	51.8106	Homeostatic_Oligos
CCDC88A	0.218735	0	0	51.4978	Homeostatic_Oligos
BACE2	1.02634	0	0	51.4573	Homeostatic_Oligos
ZDHHC14	0.407746	0	0	51.292	Homeostatic_Oligos
UBE4B	0.315595	0	0	51.1524	Homeostatic_Oligos
HIVEP3	0.545743	0	0	50.8805	Homeostatic_Oligos
ARHGAP22	0.414145	0	0	50.8661	Homeostatic_Oligos
NKAIN2	0.266576	0	0	50.75	Homeostatic_Oligos
ERC1	0.429236	0	0	50.6906	Homeostatic_Oligos
FHIT	0.313562	0	0	50.3544	Homeostatic_Oligos
ST18	0.212966	0	0	50.2598	Homeostatic_Oligos
PLA2G4C	0.498869	0	0	50.2387	Homeostatic_Oligos
CTNNA3	0.208775	0	0	50.0626	Homeostatic_Oligos
APBB2	0.209002	0	0	49.8418	Homeostatic_Oligos
PLEKHH1	0.177464	0	0	49.8053	Homeostatic_Oligos
EVA1C	0.395039	0	0	49.7727	Homeostatic_Oligos
MACROD2	0.564827	0	0	49.4235	Homeostatic_Oligos
FMNL2	0.205014	0	0	49.3677	Homeostatic_Oligos
RERE	0.200608	0	0	49.1264	Homeostatic_Oligos
ATXN1	0.250355	0	0	49.1161	Homeostatic_Oligos
PACS2	0.337016	0	0	48.9195	Homeostatic_Oligos
DIP2C	0.233533	0	0	48.4739	Homeostatic_Oligos
ZNF609	0.331605	0	0	48.3421	Homeostatic_Oligos
SGIP1	0.301501	0	0	48.1915	Homeostatic_Oligos
PEX5L	0.189794	0	0	47.9829	Homeostatic_Oligos
CAMTA1	0.296697	0	0	47.9511	Homeostatic_Oligos
SFMBT2	0.460744	0	0	47.9092	Homeostatic_Oligos
MAGI2	0.21368	0	0	47.7167	Homeostatic_Oligos
PLCL1	0.2163	0	0	47.5369	Homeostatic_Oligos
DLG2	0.186052	0	0	47.5326	Homeostatic_Oligos
C10orf90	0.189247	0	0	47.4816	Homeostatic_Oligos
RBM6	0.331641	0	0	47.456	Homeostatic_Oligos
TMEM165	0.148745	0	0	47.4295	Homeostatic_Oligos
MCF2L2	0.579876	0	0	47.1681	Homeostatic_Oligos
INSR	0.349915	0	0	47.1098	Homeostatic_Oligos
CLIP2	0.390426	0	0	46.9227	Homeostatic_Oligos
GPC5	1.15186	0	0	46.5293	Homeostatic_Oligos
KMT2C	0.22866	0	0	46.439	Homeostatic_Oligos
MARK3	0.306348	0	0	46.3807	Homeostatic_Oligos
CDH20	0.252117	0	0	46.3248	Homeostatic_Oligos
POLR2F	0.241915	0	0	46.2906	Homeostatic_Oligos
MAP4K4	0.175961	0	0	45.9864	Homeostatic_Oligos
HECTD4	0.366977	0	0	45.9137	Homeostatic_Oligos
ZFAND3	0.260634	0	0	45.8457	Homeostatic_Oligos
SLC25A13	0.270507	0	0	45.8105	Homeostatic_Oligos
AGPAT4	0.250997	0	0	45.7133	Homeostatic_Oligos
PPP6R2	0.446149	0	0	45.6842	Homeostatic_Oligos
JAKMIP3	0.430687	0	0	45.5962	Homeostatic_Oligos
LRRC63	0.393884	0	0	45.5796	Homeostatic_Oligos
LRP2	0.338482	0	0	45.5353	Homeostatic_Oligos
GOLGA4	0.294671	0	0	45.2135	Homeostatic_Oligos
NEGR1	0.372135	0	0	45.1764	Homeostatic_Oligos
ANK2	0.205572	0	0	45.1322	Homeostatic_Oligos
OSBP2	0.348498	0	0	45.0521	Homeostatic_Oligos
BCAS3	0.243197	0	0	45.0389	Homeostatic_Oligos
MAML2	0.408602	0	0	44.9661	Homeostatic_Oligos
SYNE1	0.460277	0	0	44.9584	Homeostatic_Oligos
ZMYND8	0.362962	0	0	44.6543	Homeostatic_Oligos
JMJD1C	0.22847	0	0	44.6483	Homeostatic_Oligos
STAT2	0.454645	0	0	44.5785	Homeostatic_Oligos
AKAP6	0.177728	0	0	44.5159	Homeostatic_Oligos
AFF3	0.651352	0	0	43.9217	Homeostatic_Oligos
USP34	0.223715	0	0	43.9124	Homeostatic_Oligos
MTUS1	0.188311	0	0	43.8867	Homeostatic_Oligos
LDLR	0.893086	0	0	43.8247	Homeostatic_Oligos
ATXN2	0.269384	0	0	43.5608	Homeostatic_Oligos
CDK18	0.235705	0	0	43.5212	Homeostatic_Oligos
CHKA	0.278042	0	0	43.5007	Homeostatic_Oligos
RANBP17	0.571343	0	0	43.5	Homeostatic_Oligos
GAB2	0.230221	0	0	43.3987	Homeostatic_Oligos
MVB12B	0.230655	0	0	42.9461	Homeostatic_Oligos
TECPR2	0.308402	0	0	42.9364	Homeostatic_Oligos
OTUD7B	0.278437	0	0	42.9262	Homeostatic_Oligos
CUX1	0.352986	0	0	42.7961	Homeostatic_Oligos
SBF2	0.300191	0	0	42.6431	Homeostatic_Oligos
ENOX1	0.255492	0	0	42.427	Homeostatic_Oligos
CORO2B	0.360621	0	0	42.2099	Homeostatic_Oligos
CDKAL1	0.292116	0	0	42.1495	Homeostatic_Oligos
MAGI1	0.259499	0	0	42.1187	Homeostatic_Oligos
EIF4G3	0.19884	0	0	42.0585	Homeostatic_Oligos
BIRC6	0.210144	0	0	41.9595	Homeostatic_Oligos
MAPK10	0.318061	0	0	41.7211	Homeostatic_Oligos
SLC9A9	0.240058	0	0	41.696	Homeostatic_Oligos
DPYSL5	0.352327	0	0	41.6512	Homeostatic_Oligos
SMYD3	0.436474	0	0	41.6345	Homeostatic_Oligos
CALN1	0.670699	0	0	41.2966	Homeostatic_Oligos
CD22	0.275754	0	0	41.1791	Homeostatic_Oligos
ARHGEF3	0.605692	0	0	41.0291	Homeostatic_Oligos
FKBP5	0.437856	0	0	40.9795	Homeostatic_Oligos
GARNL3	0.299335	0	0	40.7916	Homeostatic_Oligos
SASH1	0.244285	0	0	40.6731	Homeostatic_Oligos
RASGRF2	0.300315	0	0	40.6393	Homeostatic_Oligos
ATM	0.260372	0	0	40.5129	Homeostatic_Oligos
PSEN1	0.180989	0	0	40.2001	Homeostatic_Oligos
TTLL5	0.347207	0	0	40.1553	Homeostatic_Oligos
SORL1	0.424011	0	0	40.1535	Homeostatic_Oligos
MBD5	0.231586	0	0	40.0639	Homeostatic_Oligos
FRMD5	0.186184	0	0	40.0468	Homeostatic_Oligos
TNRC6A	0.218971	0	0	39.9334	Homeostatic_Oligos
TRAPPC9	0.304849	0	0	39.618	Homeostatic_Oligos
ASAP1	0.347249	0	0	39.5481	Homeostatic_Oligos
TLN2	0.441886	0	0	39.472	Homeostatic_Oligos
PI4KA	0.380704	0	0	39.3678	Homeostatic_Oligos
SAMD12	0.209526	0	0	39.3003	Homeostatic_Oligos
DENND4A	0.293183	0	0	39.2936	Homeostatic_Oligos
ZNF721	0.415103	0	0	39.1005	Homeostatic_Oligos
AGO2	0.316619	0	0	38.9861	Homeostatic_Oligos
DOCK4	0.201179	0	0	38.9707	Homeostatic_Oligos
SLCO3A1	0.166122	0	0	38.853	Homeostatic_Oligos
CBFA2T2	0.296593	0	0	38.8512	Homeostatic_Oligos
JAKMIP2	0.29387	0	0	38.7605	Homeostatic_Oligos
SGCD	0.341285	0	0	38.6137	Homeostatic_Oligos
FRMD4B	0.152724	0	0	38.555	Homeostatic_Oligos
GTF2IRD1	0.652753	0	0	38.3951	Homeostatic_Oligos
BICD1	0.341691	0	0	38.3748	Homeostatic_Oligos
ADK	0.347278	0	0	38.3252	Homeostatic_Oligos
LSAMP	0.219535	0	0	38.1899	Homeostatic_Oligos
FAF1	0.186811	0	0	38.0452	Homeostatic_Oligos
LPP	0.300878	0	0	37.7131	Homeostatic_Oligos
FAM222B	0.4587	0	0	37.6758	Homeostatic_Oligos
HERC4	0.264555	0	0	37.6313	Homeostatic_Oligos
TMEM117	0.389956	0	0	37.6173	Homeostatic_Oligos
RPS6KA2	0.334761	6.40856e-308	1.08488e-306	37.5097	Homeostatic_Oligos
RALGAPA1	0.18426	2.86028e-305	4.80067e-304	37.3468	Homeostatic_Oligos
MYO1D	0.179786	4.75931e-305	7.97823e-304	37.3331	Homeostatic_Oligos
KCTD8	0.317946	5.11705e-305	8.56747e-304	37.3312	Homeostatic_Oligos
NEK1	0.299358	1.0301e-304	1.72259e-303	37.3125	Homeostatic_Oligos
VPS13B	0.235296	1.18739e-302	1.97123e-301	37.1851	Homeostatic_Oligos
BTBD9	0.320808	1.0691e-297	1.75369e-296	36.8773	Homeostatic_Oligos
PLEKHG1	0.493254	2.33686e-297	3.82866e-296	36.8561	Homeostatic_Oligos
AGTPBP1	0.189429	3.87345e-296	6.32356e-295	36.7799	Homeostatic_Oligos
WDPCP	0.238567	3.07354e-295	4.99395e-294	36.7236	Homeostatic_Oligos
USP32	0.22136	1.2481e-294	2.02316e-293	36.6854	Homeostatic_Oligos
SOBP	0.284346	2.93406e-294	4.75049e-293	36.6621	Homeostatic_Oligos
PTPRE	0.424937	1.51498e-293	2.44999e-292	36.6173	Homeostatic_Oligos
DTNB	0.252396	1.51669e-291	2.43557e-290	36.4914	Homeostatic_Oligos
MAP7	0.103579	3.61284e-290	5.76796e-289	36.4045	Homeostatic_Oligos
RALGPS1	0.294444	4.95753e-289	7.86908e-288	36.3325	Homeostatic_Oligos
LDLRAD3	0.330695	1.4781e-288	2.34348e-287	36.3025	Homeostatic_Oligos
PIEZO2	0.255892	1.32161e-287	2.09055e-286	36.2421	Homeostatic_Oligos
SEMA4B	0.865561	1.64634e-287	2.60122e-286	36.2361	Homeostatic_Oligos
AHI1	0.241866	5.06039e-287	7.97707e-286	36.2051	Homeostatic_Oligos
NRG3	0.723254	1.27425e-286	2.00639e-285	36.1796	Homeostatic_Oligos
FAM193A	0.427158	9.7882e-285	1.53419e-283	36.0595	Homeostatic_Oligos
SNX24	0.458391	1.47568e-275	2.27663e-274	35.469	Homeostatic_Oligos
RABGAP1L	0.215704	7.25203e-275	1.11756e-273	35.4242	Homeostatic_Oligos
PARD3B	0.351305	1.65733e-274	2.55113e-273	35.4008	Homeostatic_Oligos
HIP1	0.214401	5.23915e-273	8.0287e-272	35.3032	Homeostatic_Oligos
AKAP9	0.242757	5.62533e-273	8.61089e-272	35.3012	Homeostatic_Oligos
SH3PXD2A	0.308414	2.05077e-272	3.12873e-271	35.2646	Homeostatic_Oligos
FSTL5	0.720167	1.13972e-270	1.73111e-269	35.1506	Homeostatic_Oligos
TENM4	0.83638	6.70559e-270	1.01514e-268	35.1001	Homeostatic_Oligos
TBC1D22A	0.302207	7.39399e-270	1.11813e-268	35.0974	Homeostatic_Oligos
VTI1A	0.277976	3.17319e-269	4.78275e-268	35.0559	Homeostatic_Oligos
UBE2R2	0.255831	9.67979e-268	1.4526e-266	34.9583	Homeostatic_Oligos
KIF13B	0.180896	3.94658e-266	5.89671e-265	34.8522	Homeostatic_Oligos
SMG6	0.40566	1.81301e-262	2.69423e-261	34.6096	Homeostatic_Oligos
SRGAP3	0.343121	2.86185e-262	4.24369e-261	34.5964	Homeostatic_Oligos
SIPA1L3	0.441808	6.62868e-261	9.76611e-260	34.5055	Homeostatic_Oligos
GPATCH8	0.228065	7.3332e-260	1.07695e-258	34.4359	Homeostatic_Oligos
FAM171A1	0.256085	9.53545e-258	1.38997e-256	34.2943	Homeostatic_Oligos
IQGAP1	0.178829	1.29496e-256	1.87571e-255	34.2182	Homeostatic_Oligos
PCCA	0.249867	3.50519e-253	5.05056e-252	33.9867	Homeostatic_Oligos
RBM25	0.272456	2.99742e-252	4.30989e-251	33.9235	Homeostatic_Oligos
SNX9	0.244264	3.46227e-252	4.97308e-251	33.9193	Homeostatic_Oligos
DNMT3A	0.366433	1.62038e-251	2.32503e-250	33.8738	Homeostatic_Oligos
DYNC1I1	0.292245	1.19357e-249	1.70905e-248	33.7467	Homeostatic_Oligos
SPIRE1	0.318312	4.5403e-249	6.48763e-248	33.7072	Homeostatic_Oligos
TTC7A	0.337146	7.70267e-249	1.09949e-247	33.6915	Homeostatic_Oligos
TBC1D5	0.150721	1.77462e-247	2.52264e-246	33.5983	Homeostatic_Oligos
SYTL2	0.428065	7.04376e-247	9.98181e-246	33.5573	Homeostatic_Oligos
KDM2A	0.313477	4.74216e-245	6.69946e-244	33.4317	Homeostatic_Oligos
POGZ	0.175879	1.66209e-244	2.34329e-243	33.3942	Homeostatic_Oligos
PRRC2C	0.239096	2.47947e-244	3.48851e-243	33.3823	Homeostatic_Oligos
IGF1R	0.278761	2.88834e-243	4.05548e-242	33.3087	Homeostatic_Oligos
FOXP1	0.261397	4.52584e-243	6.34818e-242	33.2952	Homeostatic_Oligos
SPTBN1	0.179295	1.49006e-242	2.08579e-241	33.2595	Homeostatic_Oligos
UBR1	0.274594	9.09404e-242	1.26782e-240	33.2051	Homeostatic_Oligos
NKTR	0.177644	7.6172e-241	1.05871e-239	33.1411	Homeostatic_Oligos
WDFY3	0.158877	1.09211e-240	1.51638e-239	33.1302	Homeostatic_Oligos
PBX3	0.322994	7.78261e-240	1.07734e-238	33.0709	Homeostatic_Oligos
EPB41L2	0.212417	5.8234e-239	8.02893e-238	33.0101	Homeostatic_Oligos
STK3	0.240938	4.39679e-237	6.01974e-236	32.8789	Homeostatic_Oligos
RUFY2	0.228432	6.2768e-235	8.52579e-234	32.7278	Homeostatic_Oligos
NSD1	0.243269	2.79175e-233	3.77339e-232	32.6118	Homeostatic_Oligos
UGGT2	0.241549	4.34077e-233	5.85557e-232	32.5983	Homeostatic_Oligos
SUPT3H	0.273245	5.48983e-233	7.39835e-232	32.5911	Homeostatic_Oligos
RASAL2	0.449961	1.16773e-232	1.5706e-231	32.5679	Homeostatic_Oligos
PPP1R12B	0.162605	5.07238e-232	6.80244e-231	32.5228	Homeostatic_Oligos
SLC27A1	0.360728	9.13565e-232	1.22158e-230	32.5048	Homeostatic_Oligos
CALD1	0.249569	3.92052e-231	5.22711e-230	32.4599	Homeostatic_Oligos
ITCH	0.162909	1.35853e-230	1.80953e-229	32.4217	Homeostatic_Oligos
NFAT5	0.261413	3.52483e-230	4.68591e-229	32.3923	Homeostatic_Oligos
ZBTB20	0.143822	4.88447e-230	6.48714e-229	32.3822	Homeostatic_Oligos
ZNF638	0.142571	3.07576e-228	4.06533e-227	32.2542	Homeostatic_Oligos
INVS	0.256235	3.60648e-228	4.76221e-227	32.2492	Homeostatic_Oligos
CHD9	0.184403	2.4905e-227	3.2823e-226	32.1893	Homeostatic_Oligos
ARID1B	0.159718	2.69783e-227	3.55214e-226	32.1868	Homeostatic_Oligos
WDR59	0.31461	1.42226e-226	1.86907e-225	32.1352	Homeostatic_Oligos
ZCCHC7	0.240326	3.68735e-226	4.82727e-225	32.1056	Homeostatic_Oligos
EHMT1	0.288783	1.58452e-225	2.06846e-224	32.0602	Homeostatic_Oligos
SLC22A15	0.199421	3.17431e-225	4.13986e-224	32.0385	Homeostatic_Oligos
EFR3B	0.497848	6.82269e-225	8.88954e-224	32.0146	Homeostatic_Oligos
RAD51B	0.256424	1.39269e-224	1.81115e-223	31.9924	Homeostatic_Oligos
MINK1	0.418987	5.13407e-223	6.67041e-222	31.8795	Homeostatic_Oligos
SLC25A29	0.411958	7.77725e-223	1.0095e-221	31.8665	Homeostatic_Oligos
PRR5L	0.202134	9.99402e-223	1.2948e-221	31.8586	Homeostatic_Oligos
CDH11	0.308123	2.48645e-222	3.21229e-221	31.83	Homeostatic_Oligos
SSBP2	0.217662	4.95336e-222	6.38134e-221	31.8084	Homeostatic_Oligos
PCLO	0.572844	1.34393e-220	1.72813e-219	31.7046	Homeostatic_Oligos
PDS5A	0.253234	3.46126e-217	4.38108e-216	31.4561	Homeostatic_Oligos
TMEM63A	0.176651	2.00328e-216	2.52866e-215	31.4003	Homeostatic_Oligos
KDM4C	0.184699	8.37292e-216	1.05494e-214	31.3548	Homeostatic_Oligos
SEMA5A	0.379225	8.76069e-216	1.10279e-214	31.3533	Homeostatic_Oligos
TPST1	0.470784	3.44688e-214	4.31913e-213	31.2361	Homeostatic_Oligos
SETBP1	0.611566	8.37401e-214	1.0474e-212	31.2077	Homeostatic_Oligos
PCM1	0.179811	1.11907e-213	1.39843e-212	31.1984	Homeostatic_Oligos
IRAK2	0.564995	3.2063e-213	4.00307e-212	31.1647	Homeostatic_Oligos
DPP6	0.334281	1.35137e-212	1.68566e-211	31.1186	Homeostatic_Oligos
NCOA1	0.185557	3.33492e-212	4.14858e-211	31.0895	Homeostatic_Oligos
ATP10B	0.159918	6.39477e-211	7.93344e-210	30.9945	Homeostatic_Oligos
NRXN1	0.39295	4.66294e-210	5.7641e-209	30.9304	Homeostatic_Oligos
ERC2	0.466664	7.50454e-210	9.26009e-209	30.915	Homeostatic_Oligos
USP54	0.130494	5.09114e-209	6.24847e-208	30.8531	Homeostatic_Oligos
NSMCE2	0.181893	1.76535e-207	2.16087e-206	30.7381	Homeostatic_Oligos
ABCC5	0.412143	2.09068e-207	2.55681e-206	30.7326	Homeostatic_Oligos
PLD1	0.154433	2.5037e-207	3.05919e-206	30.7267	Homeostatic_Oligos
EPHB2	0.453506	7.50461e-207	9.14525e-206	30.691	Homeostatic_Oligos
VPS13C	0.150765	1.22415e-206	1.48781e-205	30.6751	Homeostatic_Oligos
CTDSPL	0.611546	4.72505e-206	5.72251e-205	30.6311	Homeostatic_Oligos
FNBP1	0.118797	4.15855e-205	5.00556e-204	30.56	Homeostatic_Oligos
EXOC4	0.177232	2.83042e-204	3.38616e-203	30.4973	Homeostatic_Oligos
STX8	0.358072	1.45425e-202	1.72925e-201	30.368	Homeostatic_Oligos
BBS9	0.206586	1.62538e-202	1.93106e-201	30.3643	Homeostatic_Oligos
CSMD1	0.418183	1.65436e-202	1.9638e-201	30.3638	Homeostatic_Oligos
TTC7B	0.346458	2.89836e-202	3.43456e-201	30.3453	Homeostatic_Oligos
CLASP1	0.169713	3.85462e-202	4.56379e-201	30.3359	Homeostatic_Oligos
GALNT15	0.383028	4.85186e-202	5.73463e-201	30.3283	Homeostatic_Oligos
KIF6	0.219097	1.61966e-201	1.9127e-200	30.2886	Homeostatic_Oligos
DOCK9	0.130939	3.35205e-201	3.95513e-200	30.2646	Homeostatic_Oligos
ELOVL6	0.390561	1.03921e-200	1.22303e-199	30.2272	Homeostatic_Oligos
MAST4	0.415848	4.67586e-200	5.48885e-199	30.1775	Homeostatic_Oligos
PTPN13	0.266343	3.8922e-199	4.54951e-198	30.1073	Homeostatic_Oligos
BRAF	0.22251	3.05932e-196	3.53984e-195	29.8853	Homeostatic_Oligos
VMP1	0.253278	3.26036e-196	3.76613e-195	29.8831	Homeostatic_Oligos
TFDP2	0.318503	7.07443e-196	8.15815e-195	29.8572	Homeostatic_Oligos
TRPC4AP	0.197332	8.13474e-196	9.36517e-195	29.8525	Homeostatic_Oligos
CAMKMT	0.277469	1.29142e-195	1.48551e-194	29.8371	Homeostatic_Oligos
PLEKHA5	0.50357	3.72454e-195	4.27359e-194	29.8016	Homeostatic_Oligos
BCL2	0.369017	8.76189e-195	1.00451e-193	29.7729	Homeostatic_Oligos
SETD2	0.235389	1.30186e-194	1.49128e-193	29.7596	Homeostatic_Oligos
RIN2	0.25185	8.62265e-194	9.85261e-193	29.6961	Homeostatic_Oligos
AGO3	0.197796	1.01412e-193	1.15686e-192	29.6906	Homeostatic_Oligos
DENND1A	0.239049	1.42839e-192	1.6227e-191	29.6015	Homeostatic_Oligos
RALGAPA2	0.307338	2.13676e-192	2.42343e-191	29.5879	Homeostatic_Oligos
FAM168A	0.247253	2.35196e-192	2.6653e-191	29.5847	Homeostatic_Oligos
RPS6KA5	0.213258	3.03604e-192	3.43767e-191	29.5761	Homeostatic_Oligos
CHRM5	0.491205	9.15731e-192	1.03432e-190	29.5388	Homeostatic_Oligos
PKP4	0.168668	6.05956e-191	6.82184e-190	29.4748	Homeostatic_Oligos
CTNNA2	0.409807	3.46452e-190	3.89398e-189	29.4156	Homeostatic_Oligos
LUC7L	0.377752	4.67386e-188	5.20218e-187	29.2486	Homeostatic_Oligos
MYO5A	0.152096	3.89593e-186	4.31187e-185	29.0972	Homeostatic_Oligos
ANKRD12	0.180911	1.85533e-185	2.04846e-184	29.0436	Homeostatic_Oligos
ENOSF1	0.207933	6.23179e-183	6.82567e-182	28.8428	Homeostatic_Oligos
MON2	0.147813	9.45924e-183	1.0336e-181	28.8284	Homeostatic_Oligos
ITFG1	0.17174	1.88672e-182	2.05833e-181	28.8044	Homeostatic_Oligos
SPATA6	0.182612	2.29532e-182	2.5021e-181	28.7976	Homeostatic_Oligos
TRA2A	0.171802	3.12864e-182	3.40778e-181	28.7869	Homeostatic_Oligos
PIP5K1A	0.357089	3.49295e-182	3.80159e-181	28.7831	Homeostatic_Oligos
ZNF652	0.197516	2.02362e-181	2.19374e-180	28.7221	Homeostatic_Oligos
ZHX3	0.239862	3.2057e-181	3.46972e-180	28.7061	Homeostatic_Oligos
MTHFD1L	0.590132	3.42096e-181	3.69981e-180	28.7038	Homeostatic_Oligos
AMPD3	0.370727	5.64783e-181	6.10338e-180	28.6863	Homeostatic_Oligos
FOXO1	0.303499	6.20036e-181	6.69523e-180	28.6831	Homeostatic_Oligos
SPG11	0.2396	1.02757e-179	1.10438e-178	28.5852	Homeostatic_Oligos
VPS8	0.245676	1.68299e-177	1.79198e-176	28.4065	Homeostatic_Oligos
CNOT2	0.206903	3.76745e-177	4.00212e-176	28.3781	Homeostatic_Oligos
ABCA5	0.304361	1.92647e-176	2.04173e-175	28.3206	Homeostatic_Oligos
WDR70	0.208744	3.30498e-176	3.49732e-175	28.3016	Homeostatic_Oligos
STAG1	0.202522	4.71317e-176	4.9798e-175	28.289	Homeostatic_Oligos
LRBA	0.204238	4.45295e-175	4.67969e-174	28.2096	Homeostatic_Oligos
TLK1	0.352918	1.05087e-174	1.10185e-173	28.1792	Homeostatic_Oligos
LRRC1	0.201005	3.52107e-174	3.68346e-173	28.1363	Homeostatic_Oligos
ZSWIM6	0.139937	9.50334e-174	9.93406e-173	28.1011	Homeostatic_Oligos
VPS13D	0.242712	9.56639e-173	9.96209e-172	28.0189	Homeostatic_Oligos
NCOA6	0.218387	9.95113e-173	1.03549e-171	28.0175	Homeostatic_Oligos
MYO9A	0.230823	1.42751e-172	1.4843e-171	28.0046	Homeostatic_Oligos
CLEC16A	0.333739	4.93575e-172	5.12052e-171	27.9603	Homeostatic_Oligos
TNRC6B	0.141534	6.64309e-172	6.88138e-171	27.9497	Homeostatic_Oligos
ROBO2	0.712356	1.1953e-170	1.23632e-169	27.8463	Homeostatic_Oligos
TMEM178B	0.480497	2.26321e-170	2.33384e-169	27.8234	Homeostatic_Oligos
R3HDM2	0.228764	3.69296e-170	3.80535e-169	27.8058	Homeostatic_Oligos
PTPN12	0.318629	1.88905e-169	1.94363e-168	27.7471	Homeostatic_Oligos
UNC5C	0.141775	7.46144e-169	7.65981e-168	27.6976	Homeostatic_Oligos
RYR2	0.335278	1.58089e-168	1.61688e-167	27.6705	Homeostatic_Oligos
ARID4B	0.144236	2.24957e-168	2.29908e-167	27.6578	Homeostatic_Oligos
FTO	0.161755	3.67077e-167	3.73489e-166	27.5568	Homeostatic_Oligos
TTC3	0.164451	6.30515e-167	6.41055e-166	27.5372	Homeostatic_Oligos
MYO6	0.119332	3.54325e-166	3.59716e-165	27.4745	Homeostatic_Oligos
KIF13A	0.132179	2.57634e-164	2.59827e-163	27.3182	Homeostatic_Oligos
ZBTB8OS	0.386955	4.34191e-164	4.37565e-163	27.2991	Homeostatic_Oligos
ANKRD44	0.214089	5.83522e-164	5.87626e-163	27.2883	Homeostatic_Oligos
SGCZ	0.552711	7.45384e-164	7.50077e-163	27.2794	Homeostatic_Oligos
MBOAT1	0.525957	9.57239e-164	9.61857e-163	27.2702	Homeostatic_Oligos
ACSS2	0.33266	3.48109e-163	3.48514e-162	27.2229	Homeostatic_Oligos
GRID1	0.12841	8.88189e-163	8.8793e-162	27.1885	Homeostatic_Oligos
KIAA0586	0.354438	8.13148e-162	8.11142e-161	27.107	Homeostatic_Oligos
UACA	0.341878	1.22782e-161	1.2239e-160	27.0919	Homeostatic_Oligos
WWC2	0.397923	5.07579e-161	5.04861e-160	27.0395	Homeostatic_Oligos
AKAP8L	0.405051	8.25546e-161	8.19939e-160	27.0215	Homeostatic_Oligos
MDN1	0.314959	1.51999e-160	1.5064e-159	26.999	Homeostatic_Oligos
ABTB2	0.330037	2.16849e-160	2.14601e-159	26.9858	Homeostatic_Oligos
TRIO	0.328848	9.26634e-160	9.15051e-159	26.932	Homeostatic_Oligos
HDAC4	0.222306	3.88572e-159	3.82615e-158	26.8788	Homeostatic_Oligos
HERC1	0.176739	1.26754e-158	1.24632e-157	26.8348	Homeostatic_Oligos
PHACTR4	0.216357	1.3804e-158	1.35632e-157	26.8317	Homeostatic_Oligos
ATP11A	0.185383	1.13018e-157	1.1073e-156	26.7533	Homeostatic_Oligos
TFCP2	0.277099	1.98047e-156	1.93487e-155	26.6462	Homeostatic_Oligos
AK5	0.137132	2.19916e-155	2.14091e-154	26.5558	Homeostatic_Oligos
RAB40B	0.189212	3.26644e-155	3.17768e-154	26.541	Homeostatic_Oligos
TMCC1	0.190571	6.9471e-155	6.74399e-154	26.5125	Homeostatic_Oligos
CDK19	0.126881	4.36835e-154	4.22868e-153	26.4432	Homeostatic_Oligos
ATP2B4	0.459664	6.77841e-154	6.55246e-153	26.4266	Homeostatic_Oligos
CDC14B	0.13954	5.61608e-153	5.41365e-152	26.3466	Homeostatic_Oligos
SEC14L5	0.215682	6.52268e-153	6.28316e-152	26.3409	Homeostatic_Oligos
SCFD2	0.249007	4.56522e-152	4.38223e-151	26.267	Homeostatic_Oligos
FGD4	0.311959	5.56796e-152	5.33732e-151	26.2595	Homeostatic_Oligos
NT5C2	0.242105	1.09362e-151	1.04758e-150	26.2338	Homeostatic_Oligos
PPFIBP1	0.239484	1.37633e-151	1.31749e-150	26.2251	Homeostatic_Oligos
PXK	0.0848184	2.63561e-151	2.51941e-150	26.2003	Homeostatic_Oligos
DNM2	0.243387	4.17988e-150	3.98175e-149	26.0948	Homeostatic_Oligos
EPB41L4A	0.487663	3.82664e-149	3.62515e-148	26.0099	Homeostatic_Oligos
PARD3	0.58063	4.27539e-149	4.0447e-148	26.0056	Homeostatic_Oligos
ITSN2	0.229315	7.55875e-149	7.14107e-148	25.9838	Homeostatic_Oligos
FBXL20	0.306378	3.16216e-147	2.96906e-146	25.8399	Homeostatic_Oligos
RAB30	0.230509	5.57685e-147	5.22559e-146	25.8179	Homeostatic_Oligos
RAI14	0.38533	1.82137e-146	1.70317e-145	25.7721	Homeostatic_Oligos
RPTOR	0.272992	6.77762e-146	6.31629e-145	25.7212	Homeostatic_Oligos
ADAMTS18	0.362509	1.2763e-145	1.18862e-144	25.6966	Homeostatic_Oligos
NBEA	0.220202	9.69531e-145	8.98057e-144	25.6177	Homeostatic_Oligos
CPXM2	0.879442	5.38197e-144	4.96514e-143	25.5508	Homeostatic_Oligos
GRIA4	0.250858	9.72721e-144	8.95581e-143	25.5276	Homeostatic_Oligos
ZBTB16	0.215874	9.99161e-144	9.19308e-143	25.5266	Homeostatic_Oligos
LRRTM4	0.378821	3.80533e-143	3.48488e-142	25.4742	Homeostatic_Oligos
MAML3	0.324666	4.40023e-143	4.02432e-142	25.4685	Homeostatic_Oligos
ZNF586	0.449765	4.65238e-143	4.25211e-142	25.4664	Homeostatic_Oligos
TPCN1	0.319224	1.55212e-141	1.40921e-140	25.3285	Homeostatic_Oligos
RORA	0.290214	1.12912e-140	1.02448e-139	25.2501	Homeostatic_Oligos
RNF130	0.0892685	1.19555e-140	1.08404e-139	25.2479	Homeostatic_Oligos
MKLN1	0.125099	3.47407e-140	3.14688e-139	25.2056	Homeostatic_Oligos
CCSER1	0.57657	4.50911e-140	4.08047e-139	25.1953	Homeostatic_Oligos
SCMH1	0.350894	9.61494e-140	8.68948e-139	25.1653	Homeostatic_Oligos
HYDIN	0.535163	1.35856e-138	1.22378e-137	25.06	Homeostatic_Oligos
EPS8	0.333217	4.25806e-138	3.82808e-137	25.0144	Homeostatic_Oligos
DAPK2	0.2921	8.84539e-138	7.92625e-137	24.9852	Homeostatic_Oligos
SLC6A6	0.522401	1.57783e-137	1.41204e-136	24.9621	Homeostatic_Oligos
CDK13	0.160672	2.06103e-137	1.84207e-136	24.9514	Homeostatic_Oligos
UBR3	0.132969	2.48676e-137	2.22112e-136	24.9439	Homeostatic_Oligos
TRPS1	0.200842	5.15331e-137	4.59685e-136	24.9147	Homeostatic_Oligos
NOS1AP	0.372999	6.06252e-136	5.38691e-135	24.8157	Homeostatic_Oligos
XRN1	0.212074	3.861e-135	3.42187e-134	24.7411	Homeostatic_Oligos
KIAA1328	0.213568	4.02795e-135	3.56754e-134	24.7394	Homeostatic_Oligos
KANK4	0.632848	2.60512e-134	2.29993e-133	24.664	Homeostatic_Oligos
ARHGAP39	0.632636	4.17898e-134	3.68468e-133	24.6449	Homeostatic_Oligos
TTLL11	0.169309	5.21807e-134	4.59792e-133	24.6359	Homeostatic_Oligos
SCLT1	0.307624	6.67893e-134	5.87763e-133	24.6258	Homeostatic_Oligos
EVL	0.312622	6.71537e-134	5.90592e-133	24.6256	Homeostatic_Oligos
CLASRP	0.288216	1.82871e-133	1.60622e-132	24.585	Homeostatic_Oligos
PPP3CC	0.343542	7.38202e-133	6.45915e-132	24.5282	Homeostatic_Oligos
ST8SIA5	0.845209	1.72538e-132	1.50776e-131	24.4937	Homeostatic_Oligos
CUEDC1	0.212517	1.27322e-131	1.1049e-130	24.4121	Homeostatic_Oligos
RASGRP3	0.198427	1.29551e-131	1.12354e-130	24.4114	Homeostatic_Oligos
ANKH	0.170521	1.64897e-131	1.42918e-130	24.4015	Homeostatic_Oligos
TBCK	0.209947	4.93443e-131	4.26596e-130	24.3566	Homeostatic_Oligos
TTC17	0.184495	1.03369e-130	8.93095e-130	24.3263	Homeostatic_Oligos
USP47	0.130906	1.39416e-130	1.20302e-129	24.314	Homeostatic_Oligos
FBXL2	0.48384	1.50098e-130	1.29439e-129	24.311	Homeostatic_Oligos
NUMB	0.32442	1.95918e-130	1.68529e-129	24.3	Homeostatic_Oligos
GBF1	0.309184	3.4036e-130	2.92412e-129	24.2773	Homeostatic_Oligos
PHF21A	0.179579	4.96502e-130	4.26291e-129	24.2618	Homeostatic_Oligos
OSBPL9	0.133473	2.78062e-129	2.37997e-128	24.1908	Homeostatic_Oligos
TANGO6	0.361469	6.17106e-129	5.27862e-128	24.1579	Homeostatic_Oligos
ANKS1B	0.0875549	1.58367e-127	1.34211e-126	24.0234	Homeostatic_Oligos
CCDC7	0.222193	3.33868e-127	2.8277e-126	23.9924	Homeostatic_Oligos
LUC7L3	0.131415	4.74447e-127	4.01091e-126	23.9778	Homeostatic_Oligos
MAST2	0.392194	5.06028e-127	4.27526e-126	23.9751	Homeostatic_Oligos
DIS3L2	0.193461	1.55128e-126	1.30661e-125	23.9284	Homeostatic_Oligos
GRID2	0.245915	2.87318e-126	2.4141e-125	23.9027	Homeostatic_Oligos
FBN1	0.206546	3.88624e-126	3.2633e-125	23.8901	Homeostatic_Oligos
ELL2	0.147591	7.4661e-126	6.26169e-125	23.8628	Homeostatic_Oligos
R3HDM1	0.207707	8.54578e-126	7.16282e-125	23.8571	Homeostatic_Oligos
TBC1D12	0.154634	1.07805e-125	9.0084e-125	23.8474	Homeostatic_Oligos
SH3PXD2B	0.289635	1.32951e-125	1.10962e-124	23.8386	Homeostatic_Oligos
STPG2	0.35827	1.24807e-124	1.03787e-123	23.7446	Homeostatic_Oligos
SLC25A16	0.389767	2.71644e-124	2.25212e-123	23.7119	Homeostatic_Oligos
PRKRIP1	0.336015	3.27503e-124	2.7136e-123	23.7041	Homeostatic_Oligos
MLLT10	0.175604	1.02804e-122	8.45686e-122	23.5585	Homeostatic_Oligos
PCGF5	0.148703	2.65763e-122	2.18231e-121	23.5182	Homeostatic_Oligos
PTPRM	0.444071	2.70763e-122	2.22203e-121	23.5174	Homeostatic_Oligos
NBEAL1	0.235254	5.14838e-122	4.2175e-121	23.4901	Homeostatic_Oligos
MYCBP2	0.15444	1.09148e-121	8.91471e-121	23.4582	Homeostatic_Oligos
ELF1	0.231903	2.19961e-121	1.79441e-120	23.4283	Homeostatic_Oligos
BMPR2	0.36424	2.28458e-121	1.86262e-120	23.4267	Homeostatic_Oligos
CDH8	0.280393	3.96534e-121	3.22912e-120	23.4032	Homeostatic_Oligos
UBR5	0.167084	8.66272e-121	7.04185e-120	23.3698	Homeostatic_Oligos
STRN3	0.194123	9.87478e-121	8.01764e-120	23.3642	Homeostatic_Oligos
CPEB3	0.254218	1.56428e-120	1.2671e-119	23.3446	Homeostatic_Oligos
CCDC91	0.193328	3.13691e-120	2.53796e-119	23.3148	Homeostatic_Oligos
SKAP2	0.341759	5.04448e-120	4.07411e-119	23.2945	Homeostatic_Oligos
NFX1	0.30905	1.02569e-119	8.25474e-119	23.264	Homeostatic_Oligos
CECR2	0.20648	2.8675e-119	2.29567e-118	23.2199	Homeostatic_Oligos
TNRC6C	0.129802	1.36743e-118	1.09156e-117	23.1526	Homeostatic_Oligos
UBE2K	0.209649	1.97862e-118	1.57762e-117	23.1367	Homeostatic_Oligos
RILPL1	0.271987	2.11401e-118	1.68459e-117	23.1339	Homeostatic_Oligos
GABPB2	0.394014	3.80431e-118	3.02803e-117	23.1085	Homeostatic_Oligos
STK10	0.72771	6.95093e-118	5.52617e-117	23.0824	Homeostatic_Oligos
ATG7	0.217758	9.339e-118	7.41617e-117	23.0697	Homeostatic_Oligos
USP40	0.199407	1.78998e-117	1.41898e-116	23.0415	Homeostatic_Oligos
NCOR1	0.145934	4.78285e-117	3.78498e-116	22.9989	Homeostatic_Oligos
SMARCC1	0.217608	9.70192e-117	7.66893e-116	22.9682	Homeostatic_Oligos
BCL6	0.561565	1.17885e-116	9.31293e-116	22.9597	Homeostatic_Oligos
ABCA6	0.358454	3.67608e-116	2.89578e-115	22.9102	Homeostatic_Oligos
EHBP1	0.29349	4.28097e-116	3.37034e-115	22.9036	Homeostatic_Oligos
SSBP3	0.277274	6.18257e-116	4.86466e-115	22.8875	Homeostatic_Oligos
FBXL7	0.133524	1.3288e-115	1.04316e-114	22.8542	Homeostatic_Oligos
KLF12	0.553146	1.3567e-115	1.06445e-114	22.8532	Homeostatic_Oligos
FARP2	0.241055	2.96609e-115	2.32054e-114	22.8191	Homeostatic_Oligos
SCGB2B2	0.30125	4.00588e-115	3.13032e-114	22.8059	Homeostatic_Oligos
SGSM1	0.491993	4.00798e-115	3.13032e-114	22.8059	Homeostatic_Oligos
TRAK1	0.359692	4.27154e-115	3.33428e-114	22.8031	Homeostatic_Oligos
RNF216	0.248114	2.20552e-114	1.71574e-113	22.7311	Homeostatic_Oligos
DYM	0.128718	5.47069e-114	4.2438e-113	22.6912	Homeostatic_Oligos
PDE4DIP	0.292674	7.76575e-114	6.02076e-113	22.6758	Homeostatic_Oligos
PIBF1	0.214587	7.99311e-114	6.19354e-113	22.6745	Homeostatic_Oligos
CCAR1	0.28181	1.3097e-113	1.01312e-112	22.6528	Homeostatic_Oligos
CHFR	0.346736	1.52545e-113	1.17935e-112	22.6461	Homeostatic_Oligos
MARK1	0.427169	3.04079e-113	2.34825e-112	22.6156	Homeostatic_Oligos
MGA	0.216101	3.38895e-113	2.61564e-112	22.6109	Homeostatic_Oligos
EXT1	0.308439	4.50327e-113	3.46789e-112	22.5983	Homeostatic_Oligos
CRADD	0.192193	1.28932e-112	9.8956e-112	22.5518	Homeostatic_Oligos
BBS2	0.210236	3.41336e-112	2.61247e-111	22.5087	Homeostatic_Oligos
VPS13A	0.520828	4.06816e-112	3.1119e-111	22.5009	Homeostatic_Oligos
SUMF1	0.188464	4.24085e-112	3.2422e-111	22.499	Homeostatic_Oligos
LRCH3	0.166973	5.77177e-112	4.40771e-111	22.4854	Homeostatic_Oligos
SNAP91	0.41278	1.15064e-111	8.77733e-111	22.4547	Homeostatic_Oligos
PRR14L	0.347367	4.86334e-111	3.6955e-110	22.3906	Homeostatic_Oligos
UBE2E2	0.116975	2.19954e-110	1.66767e-109	22.3232	Homeostatic_Oligos
ANXA4	0.235443	5.48417e-110	4.15117e-109	22.2823	Homeostatic_Oligos
FOXK2	0.26089	1.10063e-109	8.32653e-109	22.2511	Homeostatic_Oligos
PPP1R9A	0.156466	2.25715e-109	1.70477e-108	22.2189	Homeostatic_Oligos
AMBRA1	0.195423	2.30866e-109	1.74272e-108	22.2178	Homeostatic_Oligos
TRPM7	0.220385	3.82878e-109	2.88861e-108	22.1951	Homeostatic_Oligos
PER3	0.224871	1.49247e-108	1.12168e-107	22.1339	Homeostatic_Oligos
RPRD2	0.222783	1.78687e-108	1.34221e-107	22.1257	Homeostatic_Oligos
ARHGAP26	0.526828	5.54318e-108	4.16147e-107	22.0746	Homeostatic_Oligos
SENP6	0.126326	6.77096e-107	5.05835e-106	21.9612	Homeostatic_Oligos
KCNMB4	0.208849	9.83226e-107	7.34135e-106	21.9442	Homeostatic_Oligos
PREX2	0.192392	1.66319e-106	1.23981e-105	21.9203	Homeostatic_Oligos
DDX17	0.0807697	4.29862e-106	3.19572e-105	21.877	Homeostatic_Oligos
GSK3B	0.161713	1.075e-105	7.97893e-105	21.8352	Homeostatic_Oligos
PTK2	0.0916604	2.87852e-105	2.13305e-104	21.7901	Homeostatic_Oligos
CERCAM	0.117585	4.30943e-105	3.19167e-104	21.7716	Homeostatic_Oligos
BTRC	0.176999	6.17549e-105	4.57126e-104	21.7551	Homeostatic_Oligos
ARL15	0.309766	2.29739e-104	1.69602e-103	21.6948	Homeostatic_Oligos
INPP5B	0.401331	1.18412e-103	8.7369e-103	21.6192	Homeostatic_Oligos
ZNF532	0.149027	1.70566e-103	1.25716e-102	21.6024	Homeostatic_Oligos
SLC35F3	0.543995	1.78631e-103	1.3159e-102	21.6003	Homeostatic_Oligos
PRKAR2A	0.243511	5.1286e-103	3.77599e-102	21.5515	Homeostatic_Oligos
CDC42BPB	0.186829	1.12669e-102	8.28648e-102	21.515	Homeostatic_Oligos
NASP	0.168801	1.12892e-102	8.29847e-102	21.5149	Homeostatic_Oligos
ATXN7L1	0.338332	1.67987e-102	1.23352e-101	21.4965	Homeostatic_Oligos
BOD1L1	0.212996	2.14672e-102	1.57465e-101	21.4851	Homeostatic_Oligos
MYO15B	0.338703	5.82626e-102	4.26907e-101	21.4387	Homeostatic_Oligos
DENND5B	0.230568	8.31126e-102	6.08018e-101	21.4221	Homeostatic_Oligos
TMEM135	0.172811	1.05326e-101	7.69701e-101	21.4111	Homeostatic_Oligos
CERS4	0.28607	5.65121e-101	4.12103e-100	21.3327	Homeostatic_Oligos
GDAP1	0.208714	1.50921e-100	1.09765e-99	21.2867	Homeostatic_Oligos
ZNF91	0.214229	2.08057e-100	1.5108e-99	21.2716	Homeostatic_Oligos
PRELID2	0.439104	3.14339e-100	2.28016e-99	21.2522	Homeostatic_Oligos
FTCDNL1	0.232899	3.15296e-100	2.2859e-99	21.2521	Homeostatic_Oligos
GOLGA8B	0.543999	3.35492e-100	2.43104e-99	21.2492	Homeostatic_Oligos
DCLK2	0.490798	4.95383e-100	3.57832e-99	21.2309	Homeostatic_Oligos
LGR4	0.317887	2.01216e-99	1.4504e-98	21.1649	Homeostatic_Oligos
NAV3	0.204081	6.018e-99	4.32654e-98	21.1132	Homeostatic_Oligos
CCDC171	0.328841	6.96861e-99	5.00735e-98	21.1063	Homeostatic_Oligos
SPECC1	0.176011	7.28063e-99	5.22882e-98	21.1042	Homeostatic_Oligos
ALMS1	0.22315	2.82656e-98	2.01943e-97	21.04	Homeostatic_Oligos
TLK2	0.211327	9.14156e-98	6.5075e-97	20.9842	Homeostatic_Oligos
AHCYL2	0.283536	1.17091e-97	8.32227e-97	20.9724	Homeostatic_Oligos
FBXL17	0.184665	1.63736e-97	1.16256e-96	20.9565	Homeostatic_Oligos
TTBK2	0.204127	1.78594e-97	1.2674e-96	20.9524	Homeostatic_Oligos
GRB10	0.210855	3.20811e-97	2.27196e-96	20.9244	Homeostatic_Oligos
SLX4IP	0.247641	4.11109e-97	2.90844e-96	20.9126	Homeostatic_Oligos
DOCK7	0.428962	1.17766e-96	8.31863e-96	20.8623	Homeostatic_Oligos
DIP2B	0.0951663	1.90726e-96	1.34516e-95	20.8393	Homeostatic_Oligos
TULP4	0.126587	2.80488e-96	1.97621e-95	20.8208	Homeostatic_Oligos
LONP2	0.170477	3.90152e-96	2.74464e-95	20.805	Homeostatic_Oligos
LRRC4C	0.17927	9.62665e-96	6.76177e-95	20.7616	Homeostatic_Oligos
AKAP13	0.771673	1.02239e-95	7.17761e-95	20.7587	Homeostatic_Oligos
GOLGB1	0.236524	2.41524e-95	1.69042e-94	20.7174	Homeostatic_Oligos
LDB3	0.127864	5.80167e-95	4.05645e-94	20.6751	Homeostatic_Oligos
SLC35D2	0.29563	6.72106e-95	4.69689e-94	20.668	Homeostatic_Oligos
ELOVL7	0.222972	2.62455e-94	1.83039e-93	20.6022	Homeostatic_Oligos
ZHX2	0.171422	7.14096e-94	4.9676e-93	20.5536	Homeostatic_Oligos
AP3B1	0.139605	1.1916e-93	8.28513e-93	20.5288	Homeostatic_Oligos
CSPP1	0.239554	1.72861e-93	1.19947e-92	20.5107	Homeostatic_Oligos
HABP4	0.350984	3.6446e-93	2.52641e-92	20.4744	Homeostatic_Oligos
KLHL32	0.0934235	1.36369e-92	9.41971e-92	20.41	Homeostatic_Oligos
KLHDC1	0.221051	1.40036e-92	9.66821e-92	20.4087	Homeostatic_Oligos
DEPTOR	0.203277	1.76149e-92	1.21554e-91	20.3975	Homeostatic_Oligos
SNRNP70	0.146017	7.17491e-92	4.92147e-91	20.3286	Homeostatic_Oligos
TTC28	0.210139	9.09259e-92	6.23375e-91	20.317	Homeostatic_Oligos
MCCC1	0.254629	2.56571e-91	1.75116e-90	20.266	Homeostatic_Oligos
ACYP2	0.108422	3.56862e-91	2.43204e-90	20.2498	Homeostatic_Oligos
STXBP5	0.18236	4.73025e-91	3.21732e-90	20.2359	Homeostatic_Oligos
SLC4A8	0.190357	5.19103e-91	3.52723e-90	20.2313	Homeostatic_Oligos
GPR158	0.418396	1.43704e-90	9.7308e-90	20.181	Homeostatic_Oligos
EEPD1	0.220904	1.67345e-90	1.13205e-89	20.1735	Homeostatic_Oligos
STAT3	0.264604	2.0132e-90	1.36121e-89	20.1644	Homeostatic_Oligos
MEIS2	0.176793	4.77261e-90	3.21748e-89	20.1216	Homeostatic_Oligos
MGAT5	0.152844	1.11252e-89	7.48541e-89	20.0796	Homeostatic_Oligos
RNF180	0.486301	1.2207e-89	8.20929e-89	20.075	Homeostatic_Oligos
CEP290	0.228982	2.12544e-88	1.41689e-87	19.9325	Homeostatic_Oligos
BRWD1	0.133205	3.96967e-88	2.64247e-87	19.9012	Homeostatic_Oligos
ITPKB	0.224516	8.21223e-88	5.4534e-87	19.8648	Homeostatic_Oligos
CATSPERG	0.530861	1.19972e-87	7.95914e-87	19.8457	Homeostatic_Oligos
PIK3CB	0.179172	1.49289e-87	9.89929e-87	19.8347	Homeostatic_Oligos
MAP2K5	0.183364	1.68634e-87	1.11713e-86	19.8286	Homeostatic_Oligos
THRB	0.473461	2.55957e-87	1.69479e-86	19.8076	Homeostatic_Oligos
AACS	0.668879	2.77859e-87	1.83893e-86	19.8035	Homeostatic_Oligos
ARFGEF1	0.174274	3.39143e-87	2.24343e-86	19.7934	Homeostatic_Oligos
WDR20	0.128545	5.48152e-87	3.62081e-86	19.7692	Homeostatic_Oligos
CPOX	0.225954	6.28631e-87	4.15041e-86	19.7623	Homeostatic_Oligos
ZRANB3	0.244746	6.64964e-87	4.38819e-86	19.7595	Homeostatic_Oligos
NUP214	0.22616	1.70288e-86	1.1216e-85	19.7119	Homeostatic_Oligos
LMF1	0.268994	3.08918e-86	2.03079e-85	19.6818	Homeostatic_Oligos
KCTD3	0.211634	3.1547e-86	2.07287e-85	19.6807	Homeostatic_Oligos
PPM1E	0.634463	3.66066e-86	2.40303e-85	19.6732	Homeostatic_Oligos
PKD2	0.138986	1.27069e-85	8.32152e-85	19.61	Homeostatic_Oligos
GIGYF2	0.135076	4.17139e-85	2.72528e-84	19.5494	Homeostatic_Oligos
NVL	0.323304	1.03329e-84	6.72835e-84	19.5031	Homeostatic_Oligos
PHIP	0.10506	1.51247e-84	9.83931e-84	19.4836	Homeostatic_Oligos
GON4L	0.351867	1.60366e-84	1.04276e-83	19.4806	Homeostatic_Oligos
LIMK2	0.638376	1.69094e-84	1.09899e-83	19.4779	Homeostatic_Oligos
FBXO32	0.229268	1.76098e-84	1.14397e-83	19.4758	Homeostatic_Oligos
RAPGEF5	0.0590459	1.77982e-84	1.15567e-83	19.4753	Homeostatic_Oligos
CHD2	0.168401	3.25697e-84	2.1138e-83	19.4443	Homeostatic_Oligos
TBC1D32	0.226659	4.76747e-84	3.09121e-83	19.4247	Homeostatic_Oligos
FOCAD	0.3227	1.48262e-83	9.57263e-83	19.3664	Homeostatic_Oligos
ZNF708	0.102978	1.62419e-83	1.04817e-82	19.3617	Homeostatic_Oligos
WWP2	0.233879	1.90025e-83	1.22518e-82	19.3536	Homeostatic_Oligos
AVL9	0.216931	2.42949e-83	1.56274e-82	19.341	Homeostatic_Oligos
ANO10	0.319739	3.8542e-83	2.4757e-82	19.3171	Homeostatic_Oligos
ARHGAP24	0.875279	6.13245e-83	3.93542e-82	19.2931	Homeostatic_Oligos
RNF144A	0.0995966	6.52514e-83	4.18351e-82	19.2899	Homeostatic_Oligos
ABLIM3	0.649733	2.33303e-82	1.49024e-81	19.224	Homeostatic_Oligos
TRPM3	0.765783	2.95744e-82	1.88557e-81	19.2116	Homeostatic_Oligos
NSRP1	0.211029	4.55872e-82	2.90381e-81	19.1892	Homeostatic_Oligos
PPM1H	0.123583	5.12036e-82	3.26005e-81	19.1831	Homeostatic_Oligos
ANKRD11	0.159064	5.69493e-82	3.62419e-81	19.1776	Homeostatic_Oligos
EYA4	0.260725	6.38316e-82	4.06029e-81	19.1717	Homeostatic_Oligos
ZMIZ1	0.269913	2.3283e-81	1.47692e-80	19.1042	Homeostatic_Oligos
PNISR	0.127083	1.07692e-80	6.79676e-80	19.0241	Homeostatic_Oligos
LATS1	0.253931	1.80759e-80	1.13873e-79	18.9969	Homeostatic_Oligos
PIGL	0.309737	1.91876e-80	1.20821e-79	18.9938	Homeostatic_Oligos
VWA8	0.173232	2.89726e-80	1.82269e-79	18.9722	Homeostatic_Oligos
CHST3	0.28342	5.83477e-80	3.66065e-79	18.9353	Homeostatic_Oligos
SYNDIG1	0.144925	5.85077e-80	3.66901e-79	18.9352	Homeostatic_Oligos
CDK14	0.35683	6.03755e-80	3.78268e-79	18.9335	Homeostatic_Oligos
PPP1R16B	0.114844	6.50985e-80	4.07674e-79	18.9296	Homeostatic_Oligos
ERCC6L2	0.173345	8.10011e-80	5.06339e-79	18.918	Homeostatic_Oligos
KALRN	0.386817	9.75124e-80	6.08998e-79	18.9083	Homeostatic_Oligos
ZZEF1	0.2336	1.0836e-79	6.76132e-79	18.9027	Homeostatic_Oligos
PHKB	0.167453	1.60902e-79	1.00261e-78	18.8818	Homeostatic_Oligos
DIP2A	0.154691	2.12214e-79	1.31995e-78	18.8672	Homeostatic_Oligos
CCDC14	0.244531	2.84391e-79	1.76729e-78	18.8517	Homeostatic_Oligos
TYW1	0.233632	2.85385e-79	1.77266e-78	18.8515	Homeostatic_Oligos
PAN3	0.132936	3.62714e-79	2.25095e-78	18.8389	Homeostatic_Oligos
UBAP1L	0.294437	4.98449e-79	3.08913e-78	18.822	Homeostatic_Oligos
SDK1	0.612763	3.0538e-78	1.88578e-77	18.7257	Homeostatic_Oligos
RAB11FIP4	0.234578	3.23195e-78	1.9949e-77	18.7227	Homeostatic_Oligos
MAPKAP1	0.193392	4.09147e-78	2.52317e-77	18.7102	Homeostatic_Oligos
RFFL	0.159083	9.7697e-78	6.01407e-77	18.6637	Homeostatic_Oligos
S100PBP	0.217633	1.19846e-77	7.37424e-77	18.6528	Homeostatic_Oligos
FBXO11	0.147326	2.44128e-77	1.49879e-76	18.6147	Homeostatic_Oligos
GALNT13	0.140434	2.67068e-77	1.63816e-76	18.6099	Homeostatic_Oligos
ULK4	0.383615	3.14727e-77	1.92963e-76	18.6011	Homeostatic_Oligos
REV3L	0.163743	1.02493e-76	6.26444e-76	18.5377	Homeostatic_Oligos
PLD5	0.205124	1.70319e-76	1.04054e-75	18.5104	Homeostatic_Oligos
MAP3K3	0.305279	3.79943e-76	2.31297e-75	18.4671	Homeostatic_Oligos
TRIM44	0.137087	4.93433e-76	3.00121e-75	18.453	Homeostatic_Oligos
TMEM232	0.316919	9.94552e-76	6.03848e-75	18.4151	Homeostatic_Oligos
NEDD4L	0.384865	1.09428e-75	6.64103e-75	18.4099	Homeostatic_Oligos
MFSD11	0.292253	1.48313e-75	8.99299e-75	18.3934	Homeostatic_Oligos
DNAJC1	0.200285	2.87858e-75	1.7439e-74	18.3574	Homeostatic_Oligos
NBAS	0.139755	3.31749e-75	2.00891e-74	18.3497	Homeostatic_Oligos
NFATC3	0.27878	1.43519e-74	8.66026e-74	18.27	Homeostatic_Oligos
ARHGAP35	0.184873	2.35764e-74	1.42079e-73	18.2429	Homeostatic_Oligos
PBRM1	0.155723	3.652e-74	2.19888e-73	18.2189	Homeostatic_Oligos
COMMD10	0.164074	8.07454e-74	4.85108e-73	18.1755	Homeostatic_Oligos
KCNMA1	0.537859	8.23058e-74	4.94267e-73	18.1744	Homeostatic_Oligos
CDC42BPA	0.0920408	1.6806e-73	1.00748e-72	18.1352	Homeostatic_Oligos
DMXL1	0.111316	2.14342e-73	1.28381e-72	18.1218	Homeostatic_Oligos
SGMS1	0.0804905	2.81867e-73	1.68532e-72	18.1068	Homeostatic_Oligos
PCBP3	0.398964	4.78819e-73	2.8567e-72	18.0776	Homeostatic_Oligos
PLEKHA7	0.48257	4.98182e-73	2.97094e-72	18.0754	Homeostatic_Oligos
ZNF608	0.134241	5.06936e-73	3.02183e-72	18.0744	Homeostatic_Oligos
SETD5	0.141479	5.52195e-73	3.28877e-72	18.0697	Homeostatic_Oligos
ITSN1	0.289036	7.52777e-73	4.47563e-72	18.0526	Homeostatic_Oligos
PPP6R3	0.109627	1.11937e-72	6.6466e-72	18.0307	Homeostatic_Oligos
LIN52	0.27003	1.65047e-72	9.78749e-72	18.0092	Homeostatic_Oligos
GK5	0.312414	1.66125e-72	9.84713e-72	18.0088	Homeostatic_Oligos
AFF1	0.235313	1.72824e-72	1.02398e-71	18.0066	Homeostatic_Oligos
TOX3	0.32886	2.26112e-72	1.33856e-71	17.9917	Homeostatic_Oligos
KCNH1	0.33362	3.44207e-72	2.03679e-71	17.9684	Homeostatic_Oligos
INTU	0.258702	3.47545e-72	2.05566e-71	17.9679	Homeostatic_Oligos
MED27	0.162823	4.5824e-72	2.70923e-71	17.9526	Homeostatic_Oligos
PLCE1	0.873924	5.84226e-72	3.45261e-71	17.9391	Homeostatic_Oligos
ANKS1A	0.230313	1.15096e-71	6.79599e-71	17.9014	Homeostatic_Oligos
FMN2	0.589578	1.18626e-71	7.00144e-71	17.8997	Homeostatic_Oligos
TRPC1	0.140065	1.27637e-71	7.52678e-71	17.8956	Homeostatic_Oligos
TBC1D2	0.261251	1.75404e-71	1.03348e-70	17.8779	Homeostatic_Oligos
UBAP2	0.294867	2.83622e-71	1.66967e-70	17.8511	Homeostatic_Oligos
ZNF254	0.246041	3.57015e-71	2.09993e-70	17.8382	Homeostatic_Oligos
CATSPER2	0.42239	3.89434e-71	2.28963e-70	17.8333	Homeostatic_Oligos
MANBA	0.263245	4.25588e-71	2.50113e-70	17.8284	Homeostatic_Oligos
ANKRD26	0.272557	1.74561e-70	1.02412e-69	17.7493	Homeostatic_Oligos
CLIP4	0.107032	3.42811e-70	2.00864e-69	17.7113	Homeostatic_Oligos
MAPK8	0.18007	5.73754e-70	3.35609e-69	17.6823	Homeostatic_Oligos
ANKRD17	0.0956367	1.74807e-69	1.02034e-68	17.6194	Homeostatic_Oligos
ARIH1	0.148806	2.24509e-69	1.30878e-68	17.6053	Homeostatic_Oligos
PPCDC	0.365537	2.92535e-69	1.70389e-68	17.5903	Homeostatic_Oligos
DDX46	0.179576	5.1062e-69	2.96786e-68	17.5587	Homeostatic_Oligos
BACH2	0.138881	5.57356e-69	3.23676e-68	17.5537	Homeostatic_Oligos
PRKG1	0.754132	2.48333e-68	1.43609e-67	17.4686	Homeostatic_Oligos
CCNY	0.0808369	3.39088e-68	1.95762e-67	17.4509	Homeostatic_Oligos
UNC13B	0.344218	4.75386e-68	2.7422e-67	17.4316	Homeostatic_Oligos
USP31	0.157433	5.65134e-68	3.25853e-67	17.4217	Homeostatic_Oligos
GTF2IRD2B	0.385119	8.21843e-68	4.73473e-67	17.4002	Homeostatic_Oligos
SLC13A3	0.150179	9.87047e-68	5.67934e-67	17.3897	Homeostatic_Oligos
TNRC18	0.377625	1.48075e-67	8.50226e-67	17.3665	Homeostatic_Oligos
KLF7	0.166528	1.51054e-67	8.66967e-67	17.3653	Homeostatic_Oligos
ZNF704	0.100858	2.9018e-67	1.66131e-66	17.3278	Homeostatic_Oligos
ZMYM5	0.281169	3.49278e-67	1.99716e-66	17.3171	Homeostatic_Oligos
RABGAP1	0.124715	4.61472e-67	2.6354e-66	17.3011	Homeostatic_Oligos
CHD7	0.113199	6.05893e-67	3.45729e-66	17.2854	Homeostatic_Oligos
CPQ	0.113877	7.38414e-67	4.21171e-66	17.274	Homeostatic_Oligos
KHDRBS2	0.360042	1.22045e-66	6.9496e-66	17.245	Homeostatic_Oligos
STK33	0.657495	2.28345e-66	1.29758e-65	17.2087	Homeostatic_Oligos
MEIS1	0.144119	3.10871e-66	1.76361e-65	17.1909	Homeostatic_Oligos
RGS7	0.332422	4.21275e-66	2.38798e-65	17.1732	Homeostatic_Oligos
SLC23A2	0.180576	7.85996e-66	4.44621e-65	17.137	Homeostatic_Oligos
FGF14	0.534645	1.22203e-65	6.90139e-65	17.1113	Homeostatic_Oligos
UBE3C	0.160387	1.47186e-65	8.30893e-65	17.1005	Homeostatic_Oligos
CEP70	0.311694	2.73917e-65	1.54188e-64	17.0642	Homeostatic_Oligos
CNNM2	0.201713	3.05106e-65	1.71673e-64	17.0579	Homeostatic_Oligos
NLRC5	1.04889	4.23876e-65	2.38307e-64	17.0387	Homeostatic_Oligos
CLMN	0.0999474	5.79086e-65	3.25434e-64	17.0205	Homeostatic_Oligos
ZSWIM5	0.251452	1.59457e-64	8.93193e-64	16.9611	Homeostatic_Oligos
SND1	0.199826	1.61795e-64	9.05921e-64	16.9602	Homeostatic_Oligos
STARD9	0.175994	2.1653e-64	1.20992e-63	16.9431	Homeostatic_Oligos
NBPF12	0.275432	3.41439e-64	1.90635e-63	16.9163	Homeostatic_Oligos
FER	0.138828	1.75482e-63	9.75797e-63	16.8196	Homeostatic_Oligos
CIT	0.577498	3.20771e-63	1.78154e-62	16.7838	Homeostatic_Oligos
AAK1	0.129282	3.23861e-63	1.79798e-62	16.7832	Homeostatic_Oligos
RPAP2	0.183455	3.95073e-63	2.19067e-62	16.7714	Homeostatic_Oligos
CLTCL1	0.560498	6.64899e-63	3.68091e-62	16.7404	Homeostatic_Oligos
CADPS	0.539935	8.56893e-63	4.74189e-62	16.7253	Homeostatic_Oligos
MNAT1	0.160465	1.31221e-62	7.24404e-62	16.6999	Homeostatic_Oligos
COMMD1	0.178219	1.3217e-62	7.2935e-62	16.6995	Homeostatic_Oligos
TRAF3	0.363723	3.58012e-62	1.97244e-61	16.6399	Homeostatic_Oligos
HEG1	0.319898	5.98815e-62	3.29516e-61	16.6091	Homeostatic_Oligos
SMURF1	0.126644	3.11455e-61	1.70365e-60	16.5099	Homeostatic_Oligos
RFX7	0.170324	4.55368e-61	2.48688e-60	16.4869	Homeostatic_Oligos
DPH6	0.191322	5.15012e-61	2.81038e-60	16.4795	Homeostatic_Oligos
RGL1	0.131015	6.22182e-61	3.39251e-60	16.4681	Homeostatic_Oligos
ATXN3	0.258979	7.61036e-61	4.14798e-60	16.4559	Homeostatic_Oligos
INO80	0.221143	9.95417e-61	5.41901e-60	16.4396	Homeostatic_Oligos
DPF3	0.176921	1.02353e-60	5.56987e-60	16.4379	Homeostatic_Oligos
RPS6KC1	0.151753	1.15541e-60	6.28501e-60	16.4306	Homeostatic_Oligos
CPPED1	0.224131	1.7894e-60	9.72215e-60	16.404	Homeostatic_Oligos
CTTNBP2	0.0855616	3.50987e-60	1.90247e-59	16.3631	Homeostatic_Oligos
LRSAM1	0.432208	5.07511e-60	2.74763e-59	16.3406	Homeostatic_Oligos
EYA3	0.218222	5.54499e-60	2.99967e-59	16.3352	Homeostatic_Oligos
PHC3	0.11735	6.49751e-60	3.51356e-59	16.3255	Homeostatic_Oligos
RNF157	0.292661	7.65361e-60	4.1371e-59	16.3155	Homeostatic_Oligos
STAT5B	0.227845	2.26954e-59	1.22294e-58	16.249	Homeostatic_Oligos
FAM228B	0.228206	2.68087e-59	1.44288e-58	16.2388	Homeostatic_Oligos
FARS2	0.180502	2.80046e-59	1.50666e-58	16.2361	Homeostatic_Oligos
RABEP1	0.141332	3.21698e-59	1.72939e-58	16.2276	Homeostatic_Oligos
GRIP1	0.496923	4.49342e-59	2.40805e-58	16.2071	Homeostatic_Oligos
ASXL1	0.152067	5.38155e-59	2.88176e-58	16.196	Homeostatic_Oligos
PPP2R2C	0.215318	6.93746e-59	3.71204e-58	16.1804	Homeostatic_Oligos
YEATS2	0.183286	1.93618e-58	1.03479e-57	16.1171	Homeostatic_Oligos
GNAQ	0.0645061	2.14959e-58	1.1484e-57	16.1106	Homeostatic_Oligos
KAT2B	0.110106	2.39584e-58	1.27945e-57	16.1039	Homeostatic_Oligos
ATAD2B	0.170332	9.74446e-58	5.19176e-57	16.0169	Homeostatic_Oligos
SMG1	0.159447	1.03234e-57	5.49596e-57	16.0133	Homeostatic_Oligos
SLMAP	0.188676	1.12621e-57	5.99105e-57	16.0079	Homeostatic_Oligos
GPR137C	0.175934	1.38011e-57	7.33036e-57	15.9952	Homeostatic_Oligos
GLCE	0.200555	1.49446e-57	7.93469e-57	15.9902	Homeostatic_Oligos
KDM4B	0.260252	2.38528e-57	1.26448e-56	15.9611	Homeostatic_Oligos
PEAK1	0.104381	4.60433e-57	2.43428e-56	15.92	Homeostatic_Oligos
CEP112	0.794481	6.0354e-57	3.18719e-56	15.903	Homeostatic_Oligos
SMARCAL1	0.32786	6.16968e-57	3.25685e-56	15.9017	Homeostatic_Oligos
RNF115	0.194215	6.78985e-57	3.58147e-56	15.8957	Homeostatic_Oligos
PTPN9	0.531289	1.243e-56	6.54647e-56	15.8577	Homeostatic_Oligos
ZMYM2	0.0848808	1.40773e-56	7.40839e-56	15.8499	Homeostatic_Oligos
TCF12	0.0792853	1.69443e-56	8.91375e-56	15.8383	Homeostatic_Oligos
PFKFB3	0.315732	2.3131e-56	1.21637e-55	15.8187	Homeostatic_Oligos
NINL	0.433945	2.47644e-56	1.30176e-55	15.8144	Homeostatic_Oligos
TMEM163	0.512025	2.49099e-56	1.30891e-55	15.814	Homeostatic_Oligos
C2CD2	0.373093	2.69239e-56	1.4142e-55	15.8091	Homeostatic_Oligos
MDM4	0.121598	2.9059e-56	1.52518e-55	15.8043	Homeostatic_Oligos
MYO18A	0.204768	3.88028e-56	2.03504e-55	15.7861	Homeostatic_Oligos
RNF38	0.190839	4.30568e-56	2.25728e-55	15.7795	Homeostatic_Oligos
MAP4K3	0.130605	4.68807e-56	2.45681e-55	15.7741	Homeostatic_Oligos
HIBCH	0.0971532	9.41609e-56	4.9233e-55	15.73	Homeostatic_Oligos
ZMYM4	0.159894	1.08596e-55	5.67372e-55	15.721	Homeostatic_Oligos
FAM135A	0.146882	1.29704e-55	6.77399e-55	15.7097	Homeostatic_Oligos
FAM193B	0.30499	3.21757e-55	1.67406e-54	15.652	Homeostatic_Oligos
BMPR1A	0.213093	3.3668e-55	1.75038e-54	15.6492	Homeostatic_Oligos
PDSS2	0.235485	3.39379e-55	1.76374e-54	15.6486	Homeostatic_Oligos
GTF2IRD2	0.407928	3.56535e-55	1.85157e-54	15.6455	Homeostatic_Oligos
CNTRL	0.266614	3.56547e-55	1.85157e-54	15.6455	Homeostatic_Oligos
ATR	0.222777	4.33555e-55	2.24977e-54	15.633	Homeostatic_Oligos
KLHL2	0.143183	1.04467e-54	5.41276e-54	15.5769	Homeostatic_Oligos
INPP4A	0.372207	1.82924e-54	9.46359e-54	15.5411	Homeostatic_Oligos
KDM2B	0.291951	2.01305e-54	1.04106e-53	15.5349	Homeostatic_Oligos
STON2	0.651006	2.92211e-54	1.50948e-53	15.511	Homeostatic_Oligos
RASGEF1C	0.423552	3.5661e-54	1.84077e-53	15.4982	Homeostatic_Oligos
IWS1	0.156452	3.91228e-54	2.01795e-53	15.4923	Homeostatic_Oligos
FNDC3A	0.117666	5.37304e-54	2.76725e-53	15.4719	Homeostatic_Oligos
ZNF131	0.218644	1.08156e-53	5.55782e-53	15.4268	Homeostatic_Oligos
SORBS1	0.380132	1.14804e-53	5.89723e-53	15.4229	Homeostatic_Oligos
DPY19L1	0.230807	1.58369e-53	8.12289e-53	15.4021	Homeostatic_Oligos
ASAP2	0.293372	1.59525e-53	8.17915e-53	15.4017	Homeostatic_Oligos
XPO6	0.168012	3.92471e-53	2.00703e-52	15.3433	Homeostatic_Oligos
SFSWAP	0.158753	4.5765e-53	2.33948e-52	15.3334	Homeostatic_Oligos
UHRF2	0.19296	8.05765e-53	4.11138e-52	15.2966	Homeostatic_Oligos
FA2H	0.0605484	8.53277e-53	4.35219e-52	15.2929	Homeostatic_Oligos
KCND3	0.86507	9.03857e-53	4.60846e-52	15.2891	Homeostatic_Oligos
CSMD2	0.234846	1.21112e-52	6.16367e-52	15.27	Homeostatic_Oligos
MED13L	0.0858211	1.51647e-52	7.70341e-52	15.2554	Homeostatic_Oligos
CYB5R4	0.191026	1.90774e-52	9.68384e-52	15.2404	Homeostatic_Oligos
MTA3	0.228569	3.38965e-52	1.71934e-51	15.2028	Homeostatic_Oligos
COL16A1	0.186493	5.41497e-52	2.74058e-51	15.1721	Homeostatic_Oligos
TRIP4	0.349429	6.81471e-52	3.44393e-51	15.157	Homeostatic_Oligos
FUT9	0.148407	8.35999e-52	4.22332e-51	15.1435	Homeostatic_Oligos
KAT6A	0.124684	8.44169e-52	4.26302e-51	15.1429	Homeostatic_Oligos
GPC6	0.794954	9.87754e-52	4.98629e-51	15.1326	Homeostatic_Oligos
ACAD10	0.401486	1.05752e-51	5.33652e-51	15.1281	Homeostatic_Oligos
SLC8A1	0.645391	1.15556e-51	5.82696e-51	15.1222	Homeostatic_Oligos
VPS41	0.154407	1.28246e-51	6.4645e-51	15.1154	Homeostatic_Oligos
PSD3	0.0794332	2.10739e-51	1.05994e-50	15.0826	Homeostatic_Oligos
MYSM1	0.156579	4.21733e-51	2.11497e-50	15.0368	Homeostatic_Oligos
SMC5	0.168479	6.51965e-51	3.266e-50	15.0079	Homeostatic_Oligos
GBE1	0.273327	8.08887e-51	4.0462e-50	14.9936	Homeostatic_Oligos
PAFAH1B1	0.0763903	1.88671e-50	9.40686e-50	14.9372	Homeostatic_Oligos
RBM33	0.118389	2.49244e-50	1.24045e-49	14.9187	Homeostatic_Oligos
SMARCA4	0.269615	3.30784e-50	1.64447e-49	14.8998	Homeostatic_Oligos
LURAP1	0.386027	3.37212e-50	1.67521e-49	14.8985	Homeostatic_Oligos
TET3	0.206141	6.66532e-50	3.30287e-49	14.8529	Homeostatic_Oligos
SMCHD1	0.121539	7.27648e-50	3.60441e-49	14.847	Homeostatic_Oligos
PAAF1	0.210848	9.93683e-50	4.90984e-49	14.8261	Homeostatic_Oligos
CLIP1	0.321824	1.28515e-49	6.33857e-49	14.8088	Homeostatic_Oligos
KIF21A	0.130334	1.68519e-49	8.30015e-49	14.7906	Homeostatic_Oligos
CDR2	0.505083	3.19829e-49	1.56901e-48	14.7474	Homeostatic_Oligos
THADA	0.162746	3.27669e-49	1.6069e-48	14.7457	Homeostatic_Oligos
RNF152	0.393916	3.57702e-49	1.75293e-48	14.7398	Homeostatic_Oligos
ASCC3	0.147453	4.10415e-49	2.01054e-48	14.7305	Homeostatic_Oligos
ZNF536	0.0587222	5.02411e-49	2.46033e-48	14.7169	Homeostatic_Oligos
PCSK7	0.237822	5.72372e-49	2.79695e-48	14.708	Homeostatic_Oligos
MPHOSPH9	0.241024	8.10819e-49	3.95371e-48	14.6845	Homeostatic_Oligos
PROS1	0.71306	9.61204e-49	4.6837e-48	14.6729	Homeostatic_Oligos
MYH14	0.303386	1.26366e-48	6.15315e-48	14.6543	Homeostatic_Oligos
RAB6A	0.133963	1.84216e-48	8.96047e-48	14.6287	Homeostatic_Oligos
TNS1	0.216124	2.35066e-48	1.14258e-47	14.6121	Homeostatic_Oligos
AFF4	0.122412	2.9552e-48	1.4344e-47	14.5965	Homeostatic_Oligos
PIGN	0.154739	5.47854e-48	2.65262e-47	14.5544	Homeostatic_Oligos
TANGO2	0.338837	6.98816e-48	3.37999e-47	14.5377	Homeostatic_Oligos
N4BP2L2	0.0508515	7.35773e-48	3.55749e-47	14.5342	Homeostatic_Oligos
SH3RF1	0.163181	8.99474e-48	4.3444e-47	14.5204	Homeostatic_Oligos
KDM3B	0.233977	9.62454e-48	4.64207e-47	14.5158	Homeostatic_Oligos
USP6NL	0.401252	2.09233e-47	1.00598e-46	14.4624	Homeostatic_Oligos
KSR1	0.245292	2.34947e-47	1.12883e-46	14.4545	Homeostatic_Oligos
NCOA3	0.249494	2.52828e-47	1.21389e-46	14.4494	Homeostatic_Oligos
ENPP6	0.199019	3.06858e-47	1.47228e-46	14.4361	Homeostatic_Oligos
PARP9	0.753234	3.32394e-47	1.59424e-46	14.4306	Homeostatic_Oligos
SRGAP2	0.212103	3.99189e-47	1.9126e-46	14.4179	Homeostatic_Oligos
FOXJ3	0.127648	6.14561e-47	2.94039e-46	14.3881	Homeostatic_Oligos
UBR2	0.114447	6.67428e-47	3.19223e-46	14.3824	Homeostatic_Oligos
HMGCLL1	0.533383	7.38345e-47	3.52896e-46	14.3754	Homeostatic_Oligos
NF1	0.06498	1.63354e-46	7.78056e-46	14.3203	Homeostatic_Oligos
FLNB	0.266506	2.3613e-46	1.12274e-45	14.2947	Homeostatic_Oligos
EMILIN2	0.549339	2.54215e-46	1.2079e-45	14.2896	Homeostatic_Oligos
PFKFB4	0.492232	3.00854e-46	1.42851e-45	14.2778	Homeostatic_Oligos
PIEZO1	0.914864	9.40408e-46	4.4468e-45	14.1982	Homeostatic_Oligos
SCARB1	0.283777	9.96342e-46	4.70643e-45	14.1941	Homeostatic_Oligos
SMOC1	0.221779	1.22944e-45	5.80156e-45	14.1794	Homeostatic_Oligos
PHLDB1	0.0751913	1.30157e-45	6.13979e-45	14.1754	Homeostatic_Oligos
FAM135B	0.475506	1.43181e-45	6.75188e-45	14.1687	Homeostatic_Oligos
FRMD4A	0.209288	1.72055e-45	8.10509e-45	14.1558	Homeostatic_Oligos
NAALADL2	0.0946836	3.22469e-45	1.51337e-44	14.1115	Homeostatic_Oligos
CD44	0.967098	3.56009e-45	1.66963e-44	14.1046	Homeostatic_Oligos
PRPF3	0.300292	4.41677e-45	2.06929e-44	14.0893	Homeostatic_Oligos
HOOK3	0.107953	7.71778e-45	3.60846e-44	14.0499	Homeostatic_Oligos
LIMCH1	0.0410432	7.76119e-45	3.62752e-44	14.0495	Homeostatic_Oligos
NRF1	0.149633	1.05433e-44	4.9195e-44	14.0278	Homeostatic_Oligos
MTMR7	0.109354	1.23138e-44	5.74169e-44	14.0167	Homeostatic_Oligos
KIF3C	0.464897	1.57644e-44	7.34815e-44	13.9992	Homeostatic_Oligos
NAA25	0.140855	1.65767e-44	7.72158e-44	13.9956	Homeostatic_Oligos
TSPAN5	0.0629225	2.68643e-44	1.24882e-43	13.9613	Homeostatic_Oligos
SRPK2	0.0469314	3.01044e-44	1.39803e-43	13.9531	Homeostatic_Oligos
LYST	0.192007	3.47669e-44	1.614e-43	13.9429	Homeostatic_Oligos
ZNF83	0.182441	3.71625e-44	1.72463e-43	13.9381	Homeostatic_Oligos
PARP6	0.233431	4.66625e-44	2.16477e-43	13.9219	Homeostatic_Oligos
COLGALT2	0.0640097	6.57719e-44	3.04719e-43	13.8973	Homeostatic_Oligos
EZH1	0.174164	7.28277e-44	3.37294e-43	13.89	Homeostatic_Oligos
DCUN1D4	0.143303	8.46125e-44	3.91479e-43	13.8793	Homeostatic_Oligos
CBFB	0.133162	1.52178e-43	7.01489e-43	13.8371	Homeostatic_Oligos
RASSF8	0.202217	1.66834e-43	7.68789e-43	13.8305	Homeostatic_Oligos
TRRAP	0.170943	1.78056e-43	8.20229e-43	13.8258	Homeostatic_Oligos
ZFYVE28	0.408659	1.88668e-43	8.68819e-43	13.8217	Homeostatic_Oligos
IL6R	1.03973	5.24164e-43	2.40412e-42	13.7479	Homeostatic_Oligos
ZNF189	0.1563	6.07915e-43	2.78639e-42	13.7372	Homeostatic_Oligos
HMGCS1	0.344726	7.15126e-43	3.27452e-42	13.7254	Homeostatic_Oligos
KIF16B	0.163831	2.75645e-42	1.25298e-41	13.6273	Homeostatic_Oligos
SENP7	0.111849	3.08103e-42	1.3996e-41	13.6192	Homeostatic_Oligos
CEP350	0.10035	5.54438e-42	2.51279e-41	13.5762	Homeostatic_Oligos
DPP10	0.231388	7.03294e-42	3.18114e-41	13.5587	Homeostatic_Oligos
REPS1	0.197631	8.05956e-42	3.6419e-41	13.5487	Homeostatic_Oligos
ZNF236	0.233886	1.16606e-41	5.26222e-41	13.5216	Homeostatic_Oligos
GAS2	0.185496	1.61777e-41	7.29112e-41	13.4975	Homeostatic_Oligos
SENP5	0.190646	1.98963e-41	8.96409e-41	13.4822	Homeostatic_Oligos
POLK	0.101465	3.37829e-41	1.51807e-40	13.4431	Homeostatic_Oligos
MTSS1	0.105248	4.4016e-41	1.97662e-40	13.4235	Homeostatic_Oligos
INTS10	0.18884	5.08698e-41	2.28217e-40	13.4128	Homeostatic_Oligos
DAAM2	0.038509	8.2312e-41	3.68674e-40	13.3771	Homeostatic_Oligos
CMIP	0.236726	8.81339e-41	3.94622e-40	13.372	Homeostatic_Oligos
TDRD3	0.120029	1.01226e-40	4.52946e-40	13.3617	Homeostatic_Oligos
MIPOL1	0.322513	1.13042e-40	5.05161e-40	13.3535	Homeostatic_Oligos
PPP2R5C	0.144938	1.27854e-40	5.70983e-40	13.3443	Homeostatic_Oligos
MROH1	0.650802	2.04579e-40	9.11849e-40	13.3092	Homeostatic_Oligos
DNAH14	0.488235	2.60277e-40	1.15785e-39	13.2912	Homeostatic_Oligos
IKBKB	0.278187	2.95987e-40	1.31589e-39	13.2816	Homeostatic_Oligos
ETV6	0.31237	2.95994e-40	1.31589e-39	13.2816	Homeostatic_Oligos
PPP2R3A	0.112977	2.99473e-40	1.33093e-39	13.2807	Homeostatic_Oligos
KMT2E	0.0670599	3.01941e-40	1.34146e-39	13.2801	Homeostatic_Oligos
SIL1	0.170703	5.0327e-40	2.23088e-39	13.2418	Homeostatic_Oligos
SZT2	0.292864	5.59035e-40	2.47647e-39	13.2339	Homeostatic_Oligos
MAP2K6	0.227592	8.00684e-40	3.54239e-39	13.2069	Homeostatic_Oligos
DGKI	0.192892	1.14156e-39	5.04076e-39	13.1802	Homeostatic_Oligos
EXTL3	0.316226	1.32231e-39	5.83139e-39	13.1691	Homeostatic_Oligos
DBF4B	0.34206	1.76987e-39	7.79266e-39	13.147	Homeostatic_Oligos
LARP1B	0.241938	1.90999e-39	8.40418e-39	13.1413	Homeostatic_Oligos
MSH3	0.169092	2.12316e-39	9.33919e-39	13.1333	Homeostatic_Oligos
SETX	0.124288	3.02958e-39	1.33007e-38	13.1063	Homeostatic_Oligos
UPF2	0.195759	4.87265e-39	2.13514e-38	13.0702	Homeostatic_Oligos
TATDN3	0.221404	7.25896e-39	3.17776e-38	13.0399	Homeostatic_Oligos
BRMS1L	0.308227	7.51414e-39	3.28738e-38	13.0372	Homeostatic_Oligos
ELN	0.34622	7.96729e-39	3.48452e-38	13.0328	Homeostatic_Oligos
VGLL4	0.172509	8.93578e-39	3.9056e-38	13.024	Homeostatic_Oligos
PHF20	0.203294	1.05978e-38	4.6232e-38	13.011	Homeostatic_Oligos
LRRC37B	0.323299	1.21737e-38	5.30227e-38	13.0004	Homeostatic_Oligos
APPL2	0.158083	2.50437e-38	1.08768e-37	12.9451	Homeostatic_Oligos
RLF	0.159159	2.94747e-38	1.27931e-37	12.9326	Homeostatic_Oligos
ZNF345	0.285475	3.00669e-38	1.30378e-37	12.9311	Homeostatic_Oligos
VPS54	0.14258	3.38282e-38	1.46642e-37	12.922	Homeostatic_Oligos
WDR33	0.142406	3.45977e-38	1.49931e-37	12.9203	Homeostatic_Oligos
ARHGAP12	0.163676	3.62361e-38	1.56932e-37	12.9167	Homeostatic_Oligos
TRPM6	0.174134	4.41803e-38	1.91156e-37	12.9014	Homeostatic_Oligos
GMDS	0.254735	5.37791e-38	2.32468e-37	12.8863	Homeostatic_Oligos
KIAA0319L	0.152037	7.92428e-38	3.42108e-37	12.8563	Homeostatic_Oligos
SNX25	0.347312	9.22301e-38	3.97927e-37	12.8446	Homeostatic_Oligos
SCAF8	0.113927	9.61244e-38	4.14599e-37	12.8414	Homeostatic_Oligos
PSPC1	0.102161	9.94289e-38	4.28717e-37	12.8388	Homeostatic_Oligos
ATF7IP2	0.621928	1.08419e-37	4.67188e-37	12.8321	Homeostatic_Oligos
SORCS2	0.160648	1.10442e-37	4.75757e-37	12.8306	Homeostatic_Oligos
TAB2	0.184152	1.71581e-37	7.38201e-37	12.7965	Homeostatic_Oligos
KATNAL2	0.272729	2.0895e-37	8.98132e-37	12.7812	Homeostatic_Oligos
SAMD4B	0.1043	3.42755e-37	1.47005e-36	12.7426	Homeostatic_Oligos
NR3C2	0.195127	5.20088e-37	2.22923e-36	12.71	Homeostatic_Oligos
CRTC1	0.344361	9.43557e-37	4.03425e-36	12.6634	Homeostatic_Oligos
ULK2	0.127298	9.46218e-37	4.04438e-36	12.6632	Homeostatic_Oligos
TOM1L2	0.103327	1.01688e-36	4.34371e-36	12.6575	Homeostatic_Oligos
SACS	0.171869	1.32605e-36	5.65907e-36	12.6366	Homeostatic_Oligos
GNB1	0.097818	1.38732e-36	5.91872e-36	12.6331	Homeostatic_Oligos
SOX5	0.47459	2.15529e-36	9.17801e-36	12.5984	Homeostatic_Oligos
DDI2	0.248634	7.82414e-36	3.31537e-35	12.4963	Homeostatic_Oligos
AFMID	0.170314	1.0844e-35	4.58932e-35	12.4703	Homeostatic_Oligos
CAMK2D	0.167085	1.49917e-35	6.33689e-35	12.4444	Homeostatic_Oligos
RAD54L2	0.273565	1.93563e-35	8.15422e-35	12.424	Homeostatic_Oligos
ZC2HC1A	0.220576	2.84173e-35	1.1964e-34	12.3933	Homeostatic_Oligos
CABIN1	0.246477	3.49137e-35	1.46901e-34	12.3768	Homeostatic_Oligos
WIPF1	0.0936365	3.77397e-35	1.58694e-34	12.3705	Homeostatic_Oligos
IMMP2L	0.127977	5.08281e-35	2.13469e-34	12.3466	Homeostatic_Oligos
HTT	0.169985	5.36684e-35	2.25191e-34	12.3422	Homeostatic_Oligos
SUFU	0.382773	5.47436e-35	2.29632e-34	12.3406	Homeostatic_Oligos
IFT172	0.236579	8.28762e-35	3.47216e-34	12.3072	Homeostatic_Oligos
FMO5	0.326792	1.25621e-34	5.25499e-34	12.2736	Homeostatic_Oligos
NEFM	0.572876	1.79371e-34	7.4989e-34	12.2447	Homeostatic_Oligos
KCND2	0.749806	2.09739e-34	8.75249e-34	12.232	Homeostatic_Oligos
DAP3	0.219397	2.2995e-34	9.59299e-34	12.2245	Homeostatic_Oligos
MED13	0.0988386	2.44459e-34	1.01921e-33	12.2195	Homeostatic_Oligos
ZNF292	0.074522	2.56041e-34	1.06685e-33	12.2158	Homeostatic_Oligos
EXOC2	0.162793	3.2145e-34	1.33818e-33	12.1973	Homeostatic_Oligos
CACNA1D	0.389092	3.51919e-34	1.46457e-33	12.1899	Homeostatic_Oligos
QRICH1	0.289094	6.20357e-34	2.5786e-33	12.1436	Homeostatic_Oligos
CEP164	0.193589	6.96169e-34	2.89285e-33	12.1342	Homeostatic_Oligos
HLCS	0.1869	7.78757e-34	3.23212e-33	12.125	Homeostatic_Oligos
KIDINS220	0.0512721	1.17006e-33	4.84594e-33	12.0916	Homeostatic_Oligos
BCL2L13	0.211021	1.5157e-33	6.2661e-33	12.0703	Homeostatic_Oligos
VOPP1	0.384696	2.76667e-33	1.14103e-32	12.0207	Homeostatic_Oligos
TCERG1	0.154197	3.41262e-33	1.40575e-32	12.0033	Homeostatic_Oligos
TRNAU1AP	0.29255	3.6537e-33	1.5046e-32	11.9977	Homeostatic_Oligos
DNAJC6	0.0331378	4.26011e-33	1.7538e-32	11.985	Homeostatic_Oligos
PIGU	0.153883	4.45388e-33	1.83302e-32	11.9813	Homeostatic_Oligos
RALYL	0.453902	6.03429e-33	2.479e-32	11.9561	Homeostatic_Oligos
WDFY2	0.0687858	6.98178e-33	2.86739e-32	11.944	Homeostatic_Oligos
TANK	0.170326	9.61155e-33	3.94036e-32	11.9174	Homeostatic_Oligos
MAPKBP1	0.24476	1.3353e-32	5.46119e-32	11.8899	Homeostatic_Oligos
PITPNC1	0.587416	1.37288e-32	5.60987e-32	11.8876	Homeostatic_Oligos
PDE1A	0.105664	1.5408e-32	6.2923e-32	11.878	Homeostatic_Oligos
BMP2K	0.188497	1.56209e-32	6.37732e-32	11.8768	Homeostatic_Oligos
ADAM19	0.218278	1.70035e-32	6.93975e-32	11.8697	Homeostatic_Oligos
MSH2	0.184848	1.99668e-32	8.13949e-32	11.8563	Homeostatic_Oligos
UBR4	0.20085	2.22152e-32	9.05068e-32	11.8473	Homeostatic_Oligos
ITGA2	0.0889918	2.35018e-32	9.56918e-32	11.8426	Homeostatic_Oligos
LIMS1	0.211445	3.25312e-32	1.32105e-31	11.8153	Homeostatic_Oligos
ARID1A	0.121248	3.41914e-32	1.38764e-31	11.8111	Homeostatic_Oligos
INTS4	0.247304	3.56324e-32	1.4457e-31	11.8077	Homeostatic_Oligos
HDAC9	0.119372	4.027e-32	1.63145e-31	11.7974	Homeostatic_Oligos
TRAPPC10	0.102987	4.09056e-32	1.65671e-31	11.7961	Homeostatic_Oligos
KIF1B	0.0419619	4.19713e-32	1.69838e-31	11.7939	Homeostatic_Oligos
ADAM12	0.217593	6.73912e-32	2.72218e-31	11.754	Homeostatic_Oligos
TIAM2	0.177443	7.2557e-32	2.92913e-31	11.7477	Homeostatic_Oligos
CSAD	0.167055	9.19902e-32	3.70712e-31	11.7276	Homeostatic_Oligos
IFT88	0.132993	1.00716e-31	4.05519e-31	11.72	Homeostatic_Oligos
PCNT	0.293776	1.27006e-31	5.10772e-31	11.7003	Homeostatic_Oligos
ATP6V0A1	0.116623	1.49746e-31	6.00821e-31	11.6863	Homeostatic_Oligos
LRRC28	0.198813	1.66344e-31	6.66636e-31	11.6774	Homeostatic_Oligos
CDK12	0.173415	1.82248e-31	7.30159e-31	11.6696	Homeostatic_Oligos
MAP2K4	0.0947233	2.02259e-31	8.09389e-31	11.6607	Homeostatic_Oligos
TLL2	0.361248	3.07262e-31	1.22708e-30	11.6251	Homeostatic_Oligos
GRK4	0.300762	3.12158e-31	1.24627e-30	11.6237	Homeostatic_Oligos
MICU2	0.120982	3.38113e-31	1.34872e-30	11.6169	Homeostatic_Oligos
CAPZB	0.135212	3.68756e-31	1.4701e-30	11.6095	Homeostatic_Oligos
TRIP12	0.0622604	4.34838e-31	1.73255e-30	11.5954	Homeostatic_Oligos
FBXW4	0.164893	5.14818e-31	2.05003e-30	11.5809	Homeostatic_Oligos
PARP4	0.223048	6.72656e-31	2.6739e-30	11.558	Homeostatic_Oligos
PTPRS	0.120895	7.71814e-31	3.0654e-30	11.5462	Homeostatic_Oligos
CACNA2D1	0.0464527	8.94679e-31	3.55133e-30	11.5335	Homeostatic_Oligos
SIPA1L1	0.0905065	9.46962e-31	3.75561e-30	11.5286	Homeostatic_Oligos
LIMA1	0.180361	1.16518e-30	4.61704e-30	11.5107	Homeostatic_Oligos
ZER1	0.223748	1.28993e-30	5.10993e-30	11.5019	Homeostatic_Oligos
VPS45	0.210023	1.29951e-30	5.14637e-30	11.5013	Homeostatic_Oligos
SLC9A8	0.265976	1.33759e-30	5.29414e-30	11.4988	Homeostatic_Oligos
L3MBTL4	0.119459	1.38886e-30	5.49548e-30	11.4956	Homeostatic_Oligos
CNTLN	0.32886	1.49357e-30	5.90468e-30	11.4893	Homeostatic_Oligos
CACNA1A	0.419836	1.52396e-30	6.0231e-30	11.4875	Homeostatic_Oligos
UVRAG	0.0544835	1.86083e-30	7.35029e-30	11.4703	Homeostatic_Oligos
PPP1R13B	0.349989	2.10619e-30	8.31467e-30	11.4595	Homeostatic_Oligos
NSUN6	0.185452	2.23274e-30	8.81172e-30	11.4545	Homeostatic_Oligos
NT5DC1	0.060966	2.24986e-30	8.87676e-30	11.4538	Homeostatic_Oligos
BCKDHB	0.138877	2.59428e-30	1.0221e-29	11.4415	Homeostatic_Oligos
TBC1D19	0.181156	2.59554e-30	1.0223e-29	11.4414	Homeostatic_Oligos
C3orf70	0.460044	2.81504e-30	1.10812e-29	11.4344	Homeostatic_Oligos
HGSNAT	0.1905	3.13095e-30	1.23107e-29	11.4252	Homeostatic_Oligos
RNF149	0.183878	3.16265e-30	1.24317e-29	11.4243	Homeostatic_Oligos
ME1	0.273423	3.50403e-30	1.37579e-29	11.4154	Homeostatic_Oligos
SERGEF	0.241938	5.34301e-30	2.09544e-29	11.3786	Homeostatic_Oligos
NRG1	0.679779	5.4457e-30	2.1351e-29	11.377	Homeostatic_Oligos
DHTKD1	0.322852	6.22071e-30	2.43757e-29	11.3654	Homeostatic_Oligos
RGS11	0.343182	7.5421e-30	2.95199e-29	11.3485	Homeostatic_Oligos
CHI3L1	1.71463	8.43636e-30	3.29824e-29	11.3387	Homeostatic_Oligos
PKNOX1	0.215064	9.08176e-30	3.54855e-29	11.3323	Homeostatic_Oligos
HFM1	0.49761	1.05449e-29	4.11675e-29	11.3192	Homeostatic_Oligos
TMC7	0.125094	1.05541e-29	4.11916e-29	11.3191	Homeostatic_Oligos
RTN1	0.110872	1.12412e-29	4.38609e-29	11.3136	Homeostatic_Oligos
VSIG10	0.322033	1.15829e-29	4.51812e-29	11.3109	Homeostatic_Oligos
NEBL	0.731844	1.40895e-29	5.49119e-29	11.2937	Homeostatic_Oligos
DHX32	0.213168	1.70235e-29	6.62529e-29	11.2771	Homeostatic_Oligos
NRG2	0.31217	2.31859e-29	9.0032e-29	11.2499	Homeostatic_Oligos
ROBO1	0.0760766	2.89828e-29	1.12351e-28	11.2302	Homeostatic_Oligos
PHACTR2	0.369352	4.32476e-29	1.67224e-28	11.1948	Homeostatic_Oligos
ST7	0.378775	5.04674e-29	1.95031e-28	11.1811	Homeostatic_Oligos
NPLOC4	0.180856	6.21894e-29	2.39993e-28	11.1625	Homeostatic_Oligos
SAP130	0.246166	8.35006e-29	3.21692e-28	11.1363	Homeostatic_Oligos
KRIT1	0.188254	1.36357e-28	5.24006e-28	11.0925	Homeostatic_Oligos
GXYLT2	0.212363	1.4404e-28	5.53064e-28	11.0876	Homeostatic_Oligos
STXBP5L	0.410284	1.64478e-28	6.31186e-28	11.0758	Homeostatic_Oligos
MED12L	0.622067	1.95481e-28	7.49115e-28	11.0603	Homeostatic_Oligos
SGK1	0.0552689	2.40785e-28	9.217e-28	11.0416	Homeostatic_Oligos
MAN1C1	0.298777	2.64572e-28	1.01135e-27	11.0331	Homeostatic_Oligos
SIMC1	0.644616	3.02549e-28	1.15555e-27	11.021	Homeostatic_Oligos
RAB40C	0.357913	3.27953e-28	1.25154e-27	11.0138	Homeostatic_Oligos
MAGI3	0.395023	3.30816e-28	1.26211e-27	11.013	Homeostatic_Oligos
ARMC8	0.101947	3.78839e-28	1.44453e-27	11.0008	Homeostatic_Oligos
RIMBP2	0.534483	5.02573e-28	1.91527e-27	10.9753	Homeostatic_Oligos
LGR5	0.139555	5.13985e-28	1.95821e-27	10.9732	Homeostatic_Oligos
TASP1	0.242095	7.97951e-28	3.0342e-27	10.9334	Homeostatic_Oligos
ZNF407	0.127647	8.85578e-28	3.36461e-27	10.924	Homeostatic_Oligos
PRPF40B	0.232804	9.15648e-28	3.4779e-27	10.9209	Homeostatic_Oligos
RIMS2	0.417109	1.03797e-27	3.93923e-27	10.9095	Homeostatic_Oligos
UBXN2A	0.175157	1.12167e-27	4.25337e-27	10.9025	Homeostatic_Oligos
SIK3	0.094662	1.48903e-27	5.64017e-27	10.8767	Homeostatic_Oligos
RNF213	0.144739	1.52596e-27	5.77848e-27	10.8744	Homeostatic_Oligos
ROCK1	0.0934644	1.71753e-27	6.49853e-27	10.8636	Homeostatic_Oligos
METTL15	0.108246	1.8426e-27	6.96791e-27	10.8572	Homeostatic_Oligos
PARP14	1.30576	2.03681e-27	7.69598e-27	10.8481	Homeostatic_Oligos
LPIN1	0.233549	2.12344e-27	8.02111e-27	10.8443	Homeostatic_Oligos
MCF2L	0.199488	2.56538e-27	9.68252e-27	10.827	Homeostatic_Oligos
TAOK3	0.0794969	2.92642e-27	1.10391e-26	10.8149	Homeostatic_Oligos
DMTF1	0.0715506	2.9934e-27	1.12887e-26	10.8128	Homeostatic_Oligos
ZNF248	0.144771	3.19179e-27	1.20336e-26	10.8069	Homeostatic_Oligos
SCN8A	0.419624	3.32394e-27	1.25284e-26	10.8032	Homeostatic_Oligos
HPSE2	0.965365	5.37609e-27	2.01802e-26	10.759	Homeostatic_Oligos
CFDP1	0.151144	6.04862e-27	2.26798e-26	10.7481	Homeostatic_Oligos
HSD17B7	0.287744	6.50806e-27	2.43826e-26	10.7414	Homeostatic_Oligos
ANKRD13C	0.115898	8.49055e-27	3.17754e-26	10.7168	Homeostatic_Oligos
EXOSC10	0.255999	9.07831e-27	3.39658e-26	10.7106	Homeostatic_Oligos
ABCB9	0.402241	1.06971e-26	4.00008e-26	10.6954	Homeostatic_Oligos
ZNF346	0.307216	1.12485e-26	4.20509e-26	10.6907	Homeostatic_Oligos
PLEKHA6	0.28249	1.28097e-26	4.78486e-26	10.6787	Homeostatic_Oligos
MICAL2	0.35961	1.29327e-26	4.82946e-26	10.6778	Homeostatic_Oligos
CUL4A	0.15622	1.44003e-26	5.37608e-26	10.6678	Homeostatic_Oligos
MARK4	0.32236	1.80535e-26	6.73076e-26	10.6468	Homeostatic_Oligos
TSEN2	0.254273	2.09823e-26	7.81421e-26	10.6328	Homeostatic_Oligos
EXOC6	0.173993	2.11267e-26	7.86585e-26	10.6321	Homeostatic_Oligos
WDR17	0.268616	2.2116e-26	8.23198e-26	10.6278	Homeostatic_Oligos
PNPLA7	0.351535	2.62146e-26	9.74699e-26	10.612	Homeostatic_Oligos
CNTNAP3	0.538135	2.76652e-26	1.02752e-25	10.6069	Homeostatic_Oligos
NEFH	1.06295	3.39774e-26	1.25992e-25	10.5877	Homeostatic_Oligos
USP4	0.283237	4.83888e-26	1.78997e-25	10.5546	Homeostatic_Oligos
TARBP1	0.151153	6.1649e-26	2.27436e-25	10.5318	Homeostatic_Oligos
EXD3	0.312014	6.27614e-26	2.31416e-25	10.5301	Homeostatic_Oligos
DGKD	0.137752	8.76191e-26	3.22726e-25	10.4987	Homeostatic_Oligos
LRRFIP1	0.558246	1.04541e-25	3.84846e-25	10.482	Homeostatic_Oligos
TRAK2	0.214209	1.43379e-25	5.26694e-25	10.4521	Homeostatic_Oligos
ACIN1	0.155197	1.69e-25	6.20312e-25	10.4365	Homeostatic_Oligos
GBP2	1.07655	1.7059e-25	6.25981e-25	10.4356	Homeostatic_Oligos
PCDH15	0.797534	1.78634e-25	6.5515e-25	10.4312	Homeostatic_Oligos
NAV1	0.0820784	2.22089e-25	8.13437e-25	10.4105	Homeostatic_Oligos
RTTN	0.107458	2.23438e-25	8.1816e-25	10.4099	Homeostatic_Oligos
WDR7	0.0578318	2.38069e-25	8.71272e-25	10.4039	Homeostatic_Oligos
CRTC3	0.0822975	2.38775e-25	8.73623e-25	10.4036	Homeostatic_Oligos
GLIS3	0.889611	2.93226e-25	1.07114e-24	10.384	Homeostatic_Oligos
HELB	0.404733	2.98587e-25	1.09043e-24	10.3823	Homeostatic_Oligos
SH3D21	1.45006	3.73795e-25	1.36328e-24	10.3608	Homeostatic_Oligos
RSRC1	0.0912585	4.69453e-25	1.70898e-24	10.339	Homeostatic_Oligos
WSB1	7.5586e-05	5.81749e-25	2.11442e-24	10.3184	Homeostatic_Oligos
ARHGEF7	0.049453	5.83259e-25	2.11934e-24	10.3182	Homeostatic_Oligos
TTC27	0.175004	6.53238e-25	2.37174e-24	10.3073	Homeostatic_Oligos
SFI1	0.411639	7.79387e-25	2.82528e-24	10.2903	Homeostatic_Oligos
EML2	0.149257	9.49161e-25	3.43347e-24	10.2713	Homeostatic_Oligos
NCOA2	0.0886711	1.13757e-24	4.10959e-24	10.2538	Homeostatic_Oligos
MPDZ	0.0658141	1.22468e-24	4.42314e-24	10.2467	Homeostatic_Oligos
MTOR	0.194836	1.52437e-24	5.50261e-24	10.2255	Homeostatic_Oligos
TTC14	0.105645	1.56535e-24	5.64907e-24	10.2229	Homeostatic_Oligos
CLYBL	0.4563	1.57506e-24	5.68262e-24	10.2223	Homeostatic_Oligos
AOAH	0.27476	1.64472e-24	5.9324e-24	10.2181	Homeostatic_Oligos
DENND4C	0.159444	1.8296e-24	6.59403e-24	10.2078	Homeostatic_Oligos
IFI16	0.260256	1.92e-24	6.91623e-24	10.2031	Homeostatic_Oligos
ADAM23	0.303239	2.09576e-24	7.54342e-24	10.1946	Homeostatic_Oligos
TMPRSS5	0.242082	2.83682e-24	1.01974e-23	10.1652	Homeostatic_Oligos
ZFAND6	0.151747	3.49008e-24	1.25391e-23	10.1449	Homeostatic_Oligos
ABCD4	0.236491	3.93238e-24	1.41208e-23	10.1333	Homeostatic_Oligos
JAK2	0.220902	4.16832e-24	1.49642e-23	10.1276	Homeostatic_Oligos
WRN	0.131782	5.68412e-24	2.03686e-23	10.0972	Homeostatic_Oligos
TTLL4	0.291365	5.73263e-24	2.05371e-23	10.0964	Homeostatic_Oligos
GALNT7	0.140925	7.19952e-24	2.57318e-23	10.074	Homeostatic_Oligos
MPRIP	0.107415	1.04214e-23	3.71989e-23	10.0376	Homeostatic_Oligos
BRF1	0.183515	1.19922e-23	4.27502e-23	10.0237	Homeostatic_Oligos
ZFP36L1	1.01191	1.87243e-23	6.66097e-23	9.97959	Homeostatic_Oligos
SLC16A7	0.172217	2.05447e-23	7.30489e-23	9.97038	Homeostatic_Oligos
AGBL4	0.456149	2.37877e-23	8.4558e-23	9.95581	Homeostatic_Oligos
SAFB2	0.216732	2.38386e-23	8.4717e-23	9.9556	Homeostatic_Oligos
CACNA1B	0.381764	2.38923e-23	8.48641e-23	9.95537	Homeostatic_Oligos
NUP205	0.254135	2.47482e-23	8.78812e-23	9.95187	Homeostatic_Oligos
DYNC2H1	0.150179	2.57488e-23	9.13636e-23	9.94793	Homeostatic_Oligos
SLC35E3	0.153714	3.07487e-23	1.08964e-22	9.93025	Homeostatic_Oligos
ANKDD1A	0.459743	4.88645e-23	1.7276e-22	9.88396	Homeostatic_Oligos
RAPGEF1	0.271734	5.84745e-23	2.06683e-22	9.86596	Homeostatic_Oligos
RNGTT	0.124006	9.07049e-23	3.19782e-22	9.82181	Homeostatic_Oligos
NEDD4	0.328903	9.4269e-23	3.32092e-22	9.81792	Homeostatic_Oligos
RHBDD1	0.135134	9.73953e-23	3.42929e-22	9.81463	Homeostatic_Oligos
GRAMD1C	1.01818	1.22491e-22	4.30849e-22	9.79148	Homeostatic_Oligos
RASA2	0.137651	1.22974e-22	4.32438e-22	9.79108	Homeostatic_Oligos
LHFPL4	0.685582	1.36126e-22	4.78442e-22	9.7808	Homeostatic_Oligos
ERICH1	0.222518	1.60131e-22	5.62381e-22	9.76435	Homeostatic_Oligos
USP24	0.102629	1.61256e-22	5.66186e-22	9.76364	Homeostatic_Oligos
GALNT18	0.527022	1.62328e-22	5.69806e-22	9.76297	Homeostatic_Oligos
TFEB	0.092144	1.63231e-22	5.7283e-22	9.76241	Homeostatic_Oligos
SLC7A11	0.482349	1.65703e-22	5.81356e-22	9.76089	Homeostatic_Oligos
BCL2L1	0.124109	2.02e-22	7.07978e-22	9.74078	Homeostatic_Oligos
STRBP	0.226718	2.17062e-22	7.59995e-22	9.73347	Homeostatic_Oligos
AIG1	0.0911056	2.23099e-22	7.80732e-22	9.73068	Homeostatic_Oligos
RASSF4	0.134869	2.49317e-22	8.71817e-22	9.71937	Homeostatic_Oligos
NUBPL	0.113987	2.86963e-22	1.00269e-21	9.70504	Homeostatic_Oligos
SCAI	0.192353	3.16478e-22	1.10414e-21	9.69505	Homeostatic_Oligos
HSPA12A	0.145575	3.99804e-22	1.39238e-21	9.67116	Homeostatic_Oligos
STK38	0.226622	4.1553e-22	1.44604e-21	9.66722	Homeostatic_Oligos
MAPK14	0.159521	4.28086e-22	1.48899e-21	9.66417	Homeostatic_Oligos
SLTM	0.0928958	4.81003e-22	1.6722e-21	9.65223	Homeostatic_Oligos
GALNT11	0.235269	5.41208e-22	1.87912e-21	9.64013	Homeostatic_Oligos
MMS22L	0.21015	5.67367e-22	1.96895e-21	9.63528	Homeostatic_Oligos
BCR	0.39747	7.44351e-22	2.57924e-21	9.60736	Homeostatic_Oligos
PRKCB	0.148085	7.73718e-22	2.68033e-21	9.60337	Homeostatic_Oligos
FYCO1	0.238102	8.89943e-22	3.08062e-21	9.58894	Homeostatic_Oligos
TSC22D2	0.127445	9.43177e-22	3.26408e-21	9.58294	Homeostatic_Oligos
STYXL1	0.288275	9.61213e-22	3.32566e-21	9.58099	Homeostatic_Oligos
ZNF521	0.151645	1.20344e-21	4.15744e-21	9.55775	Homeostatic_Oligos
FNDC3B	0.248124	1.22016e-21	4.21416e-21	9.55632	Homeostatic_Oligos
P2RX7	0.0689335	1.31158e-21	4.52534e-21	9.54884	Homeostatic_Oligos
NRCAM	0.463165	1.56331e-21	5.38445e-21	9.53063	Homeostatic_Oligos
SOS1	0.112577	1.7386e-21	5.98216e-21	9.51959	Homeostatic_Oligos
PTPRG	0.503998	1.77739e-21	6.11411e-21	9.5173	Homeostatic_Oligos
PAM	0.652158	1.82742e-21	6.28464e-21	9.51441	Homeostatic_Oligos
JAZF1	0.085258	1.84359e-21	6.33868e-21	9.5135	Homeostatic_Oligos
B4GALT5	0.222652	2.63185e-21	9.02856e-21	9.47641	Homeostatic_Oligos
LIPC	0.629581	2.86604e-21	9.82212e-21	9.46751	Homeostatic_Oligos
ITFG2	0.194048	3.34131e-21	1.14395e-20	9.45146	Homeostatic_Oligos
NEK3	0.115825	3.40614e-21	1.16586e-20	9.44945	Homeostatic_Oligos
CAPS2	0.126228	4.14633e-21	1.41709e-20	9.42884	Homeostatic_Oligos
DCAKD	0.356974	6.76878e-21	2.3042e-20	9.37729	Homeostatic_Oligos
ZNF577	0.175014	6.7903e-21	2.31096e-20	9.37696	Homeostatic_Oligos
DENND2A	0.188187	7.31971e-21	2.48743e-20	9.36904	Homeostatic_Oligos
RAD52	0.214178	7.84573e-21	2.66487e-20	9.36171	Homeostatic_Oligos
ZNF438	0.148903	8.16856e-21	2.77316e-20	9.35745	Homeostatic_Oligos
SNCA	0.120229	8.44367e-21	2.86514e-20	9.35395	Homeostatic_Oligos
CDKL1	0.171271	8.85365e-21	3.00203e-20	9.34893	Homeostatic_Oligos
NPRL3	0.167463	9.48222e-21	3.21358e-20	9.34167	Homeostatic_Oligos
EML1	0.177751	9.55029e-21	3.23585e-20	9.34092	Homeostatic_Oligos
ANKMY1	0.216466	1.16861e-20	3.95656e-20	9.31953	Homeostatic_Oligos
CDH18	0.559456	1.35642e-20	4.59134e-20	9.3037	Homeostatic_Oligos
ZFC3H1	0.13111	1.37582e-20	4.65469e-20	9.30219	Homeostatic_Oligos
CHST11	0.92432	1.43133e-20	4.8413e-20	9.29799	Homeostatic_Oligos
KIAA1755	0.0880313	1.54723e-20	5.23205e-20	9.2897	Homeostatic_Oligos
FANCC	0.197235	1.79715e-20	6.06818e-20	9.27375	Homeostatic_Oligos
DNAH9	0.36231	2.00432e-20	6.76274e-20	9.26211	Homeostatic_Oligos
ST3GAL2	0.499396	2.05336e-20	6.92652e-20	9.25953	Homeostatic_Oligos
CLASP2	0.050769	2.15488e-20	7.26538e-20	9.25437	Homeostatic_Oligos
RSU1	0.229175	2.17912e-20	7.34352e-20	9.25318	Homeostatic_Oligos
FRK	0.192642	2.34096e-20	7.88118e-20	9.24552	Homeostatic_Oligos
TRIM37	0.217402	2.96172e-20	9.9564e-20	9.22034	Homeostatic_Oligos
ESYT2	0.145147	3.14188e-20	1.05595e-19	9.214	Homeostatic_Oligos
DAB1	0.232319	3.14838e-20	1.05787e-19	9.21378	Homeostatic_Oligos
NCOA7	0.0422401	3.44337e-20	1.15643e-19	9.20417	Homeostatic_Oligos
RIC3	0.210127	3.55129e-20	1.1918e-19	9.20085	Homeostatic_Oligos
SLC24A2	0.0434377	3.62501e-20	1.21624e-19	9.19864	Homeostatic_Oligos
CERS5	0.192438	3.68297e-20	1.23539e-19	9.19694	Homeostatic_Oligos
ICA1L	0.186545	3.85098e-20	1.29143e-19	9.19214	Homeostatic_Oligos
SPDYE3	0.275759	4.06291e-20	1.3615e-19	9.18638	Homeostatic_Oligos
CBLB	0.114777	4.50804e-20	1.50993e-19	9.17518	Homeostatic_Oligos
TMEM120B	0.488669	4.77461e-20	1.59766e-19	9.16899	Homeostatic_Oligos
SP110	0.317348	5.13994e-20	1.71823e-19	9.16104	Homeostatic_Oligos
TOP1	0.117656	5.82758e-20	1.94432e-19	9.14748	Homeostatic_Oligos
ARID4A	0.129659	6.41881e-20	2.1395e-19	9.13704	Homeostatic_Oligos
ZDHHC11B	0.163901	7.84915e-20	2.61246e-19	9.11525	Homeostatic_Oligos
HELZ	0.127006	9.2945e-20	3.08903e-19	9.0969	Homeostatic_Oligos
PHLPP1	0.0506689	1.00833e-19	3.35039e-19	9.08805	Homeostatic_Oligos
ANKAR	0.145427	1.07189e-19	3.55986e-19	9.0814	Homeostatic_Oligos
ARHGAP28	0.779489	1.15285e-19	3.82594e-19	9.07347	Homeostatic_Oligos
ZNF846	0.34202	1.31823e-19	4.36951e-19	9.05886	Homeostatic_Oligos
ARSI	0.322903	1.33982e-19	4.44002e-19	9.05709	Homeostatic_Oligos
GTF2I	0.0546206	1.42627e-19	4.72421e-19	9.05026	Homeostatic_Oligos
GALNT2	0.183719	1.55704e-19	5.15364e-19	9.04068	Homeostatic_Oligos
KCTD16	0.349708	1.79918e-19	5.94937e-19	9.02486	Homeostatic_Oligos
RAPGEF4	0.366066	1.95669e-19	6.46554e-19	9.01567	Homeostatic_Oligos
CDK5RAP2	0.0795485	1.97463e-19	6.5217e-19	9.01467	Homeostatic_Oligos
C19orf12	0.295013	2.0068e-19	6.62634e-19	9.0129	Homeostatic_Oligos
USP15	0.100579	2.19581e-19	7.24697e-19	9.00303	Homeostatic_Oligos
SYMPK	0.195541	2.67722e-19	8.82519e-19	8.98124	Homeostatic_Oligos
FAM13B	0.0582772	2.78537e-19	9.17951e-19	8.97689	Homeostatic_Oligos
SESN1	0.116123	2.93091e-19	9.65451e-19	8.97128	Homeostatic_Oligos
RPS6KB1	0.176255	3.13397e-19	1.0311e-18	8.9639	Homeostatic_Oligos
PTPRZ1	0.574296	3.19967e-19	1.05222e-18	8.96161	Homeostatic_Oligos
DENND6A	0.132406	3.27496e-19	1.07672e-18	8.95905	Homeostatic_Oligos
PARP8	0.658112	3.69436e-19	1.21373e-18	8.94575	Homeostatic_Oligos
STK39	0.0369803	4.62736e-19	1.51845e-18	8.92085	Homeostatic_Oligos
RYR3	0.676754	5.03177e-19	1.65076e-18	8.91156	Homeostatic_Oligos
ETFA	0.204052	5.12547e-19	1.6807e-18	8.90952	Homeostatic_Oligos
REV1	0.121563	5.21562e-19	1.70944e-18	8.90759	Homeostatic_Oligos
PRTG	0.361543	5.31375e-19	1.74077e-18	8.90552	Homeostatic_Oligos
TET1	0.208461	5.89794e-19	1.93031e-18	8.89394	Homeostatic_Oligos
SEC23IP	0.201462	5.99557e-19	1.96133e-18	8.89212	Homeostatic_Oligos
PNPLA3	1.1205	6.48802e-19	2.12041e-18	8.88334	Homeostatic_Oligos
EPB41L5	0.23865	6.80263e-19	2.22217e-18	8.87808	Homeostatic_Oligos
CNKSR3	0.157089	6.81203e-19	2.22471e-18	8.87792	Homeostatic_Oligos
CNTN4	0.586074	6.91391e-19	2.25691e-18	8.87627	Homeostatic_Oligos
AEBP2	0.121196	7.09756e-19	2.31631e-18	8.87335	Homeostatic_Oligos
RBMS1	0.428741	7.58261e-19	2.47402e-18	8.86599	Homeostatic_Oligos
CDH12	0.14725	7.80834e-19	2.54646e-18	8.86272	Homeostatic_Oligos
ATP6V0D2	1.23126	8.56552e-19	2.78942e-18	8.8524	Homeostatic_Oligos
EML6	0.383685	8.69233e-19	2.82938e-18	8.85076	Homeostatic_Oligos
ANKRD27	0.295304	1.05992e-18	3.44681e-18	8.8286	Homeostatic_Oligos
SPRED2	0.364776	1.11076e-18	3.60787e-18	8.82336	Homeostatic_Oligos
ERGIC1	0.21265	1.32231e-18	4.29097e-18	8.80382	Homeostatic_Oligos
SRRM1	0.075181	1.45721e-18	4.72425e-18	8.79292	Homeostatic_Oligos
SLC38A9	0.104088	1.51653e-18	4.91308e-18	8.78844	Homeostatic_Oligos
ZNF471	0.191905	1.78741e-18	5.78246e-18	8.76995	Homeostatic_Oligos
MAP3K5	0.786837	2.0029e-18	6.47808e-18	8.75713	Homeostatic_Oligos
TSC1	0.159435	2.03935e-18	6.59286e-18	8.75509	Homeostatic_Oligos
RBM5	0.0838266	2.09977e-18	6.78342e-18	8.7518	Homeostatic_Oligos
KIAA0825	0.201231	2.47164e-18	7.97912e-18	8.73338	Homeostatic_Oligos
STXBP1	0.221142	2.55644e-18	8.25096e-18	8.72957	Homeostatic_Oligos
SRBD1	0.180223	2.70919e-18	8.73782e-18	8.723	Homeostatic_Oligos
LIMD1	0.304108	2.83535e-18	9.14256e-18	8.71785	Homeostatic_Oligos
GPT2	0.217116	3.38155e-18	1.08961e-17	8.69788	Homeostatic_Oligos
AGO4	0.174762	3.71207e-18	1.19555e-17	8.68728	Homeostatic_Oligos
NUP98	0.158885	3.73726e-18	1.20338e-17	8.68652	Homeostatic_Oligos
LRRFIP2	0.0404398	3.80815e-18	1.22592e-17	8.68438	Homeostatic_Oligos
USP53	0.399304	3.9021e-18	1.25587e-17	8.68161	Homeostatic_Oligos
MOB3B	0.033848	3.97521e-18	1.2788e-17	8.6795	Homeostatic_Oligos
NR2C2	0.112699	4.03333e-18	1.29689e-17	8.67785	Homeostatic_Oligos
IRF2	0.113826	4.38692e-18	1.41026e-17	8.66828	Homeostatic_Oligos
PPIP5K1	0.407055	5.13092e-18	1.64712e-17	8.65042	Homeostatic_Oligos
CEP192	0.0998235	5.78124e-18	1.85354e-17	8.63679	Homeostatic_Oligos
ILKAP	0.109186	5.78204e-18	1.85354e-17	8.63678	Homeostatic_Oligos
ITPR2	0.194892	6.1162e-18	1.95975e-17	8.63035	Homeostatic_Oligos
ABCA9	0.357147	6.75492e-18	2.1629e-17	8.61899	Homeostatic_Oligos
ZNF208	0.222927	6.99881e-18	2.24047e-17	8.61492	Homeostatic_Oligos
RFX3	0.0802982	7.04309e-18	2.25412e-17	8.6142	Homeostatic_Oligos
SLC10A7	0.140427	7.05067e-18	2.25602e-17	8.61408	Homeostatic_Oligos
BTAF1	0.108028	7.68901e-18	2.45912e-17	8.60414	Homeostatic_Oligos
NUP160	0.15884	7.91687e-18	2.53082e-17	8.60079	Homeostatic_Oligos
UNK	0.198036	9.90879e-18	3.16464e-17	8.575	Homeostatic_Oligos
COPA	0.0579525	1.02364e-17	3.26699e-17	8.57125	Homeostatic_Oligos
CD46	0.0638668	1.14524e-17	3.65086e-17	8.55832	Homeostatic_Oligos
WBP2NL	0.25744	1.20688e-17	3.84556e-17	8.55227	Homeostatic_Oligos
NBPF11	0.241027	1.45887e-17	4.64526e-17	8.53036	Homeostatic_Oligos
PPP4R1	0.126941	1.63319e-17	5.19552e-17	8.5173	Homeostatic_Oligos
FERMT2	0.0971216	1.87042e-17	5.94469e-17	8.50157	Homeostatic_Oligos
CAPN7	0.101075	1.93562e-17	6.14764e-17	8.49759	Homeostatic_Oligos
FAM169A	0.146401	1.95122e-17	6.19289e-17	8.49666	Homeostatic_Oligos
NFKB1	0.104986	2.66475e-17	8.44196e-17	8.46039	Homeostatic_Oligos
KLHL22	0.251701	2.68721e-17	8.5092e-17	8.45942	Homeostatic_Oligos
PKIA	0.329416	2.82271e-17	8.93208e-17	8.45368	Homeostatic_Oligos
ST7L	0.141034	3.2018e-17	1.01223e-16	8.43896	Homeostatic_Oligos
DCP1A	0.183254	3.5105e-17	1.10881e-16	8.42819	Homeostatic_Oligos
DNHD1	0.125762	3.63481e-17	1.14754e-16	8.42412	Homeostatic_Oligos
ZNF133	0.208042	4.76978e-17	1.50276e-16	8.39224	Homeostatic_Oligos
EPS15L1	0.187396	4.77872e-17	1.50523e-16	8.39202	Homeostatic_Oligos
GGA2	0.344295	5.1387e-17	1.61825e-16	8.38348	Homeostatic_Oligos
EPDR1	0.4746	5.36854e-17	1.69024e-16	8.37833	Homeostatic_Oligos
SRGAP1	0.106873	5.62151e-17	1.76948e-16	8.3729	Homeostatic_Oligos
CELF2	0.383781	5.98068e-17	1.88211e-16	8.36561	Homeostatic_Oligos
ZNF439	0.192288	6.5588e-17	2.06121e-16	8.35472	Homeostatic_Oligos
MTMR3	0.137829	6.85849e-17	2.15391e-16	8.34944	Homeostatic_Oligos
ZSCAN5A	0.284482	7.68517e-17	2.41078e-16	8.33599	Homeostatic_Oligos
EVI5	0.0656894	8.44971e-17	2.64819e-16	8.32476	Homeostatic_Oligos
AKAP10	0.123079	8.73137e-17	2.7346e-16	8.32088	Homeostatic_Oligos
POU2F1	0.0699023	9.07629e-17	2.84133e-16	8.31629	Homeostatic_Oligos
ADCY2	0.563969	9.18484e-17	2.87465e-16	8.31488	Homeostatic_Oligos
BAZ1B	0.142228	9.20386e-17	2.87995e-16	8.31463	Homeostatic_Oligos
DENND5A	0.026153	1.07659e-16	3.36566e-16	8.29602	Homeostatic_Oligos
MAP2	0.224221	1.14821e-16	3.58792e-16	8.28836	Homeostatic_Oligos
PTPN2	0.187801	1.22218e-16	3.81819e-16	8.28093	Homeostatic_Oligos
CCDC180	0.453632	1.23078e-16	3.84419e-16	8.28009	Homeostatic_Oligos
GLS	0.0808603	1.38753e-16	4.32789e-16	8.26581	Homeostatic_Oligos
DLGAP1	0.245019	1.4171e-16	4.4191e-16	8.26329	Homeostatic_Oligos
POLD3	0.228792	1.49241e-16	4.6508e-16	8.25711	Homeostatic_Oligos
CTTNBP2NL	0.262197	1.50633e-16	4.69312e-16	8.256	Homeostatic_Oligos
GYS1	0.461049	1.56433e-16	4.87272e-16	8.25149	Homeostatic_Oligos
TENM2	0.411984	1.57253e-16	4.89715e-16	8.25086	Homeostatic_Oligos
INTS9	0.208496	1.61978e-16	5.04315e-16	8.24733	Homeostatic_Oligos
CD2AP	0.236525	1.66455e-16	5.1802e-16	8.24407	Homeostatic_Oligos
DROSHA	0.173038	2.13268e-16	6.62805e-16	8.21438	Homeostatic_Oligos
LCOR	0.0387005	2.15104e-16	6.68359e-16	8.21335	Homeostatic_Oligos
ABLIM2	0.308272	2.26273e-16	7.02426e-16	8.20727	Homeostatic_Oligos
SGK3	0.0430079	2.36241e-16	7.33207e-16	8.20209	Homeostatic_Oligos
DOT1L	0.29167	3.03147e-16	9.38737e-16	8.17207	Homeostatic_Oligos
LARP4B	0.113318	3.17832e-16	9.83326e-16	8.16636	Homeostatic_Oligos
SMARCA2	0.104188	3.69905e-16	1.14366e-15	8.14803	Homeostatic_Oligos
ZNF274	0.232036	3.79043e-16	1.17139e-15	8.14508	Homeostatic_Oligos
SEC31A	0.121926	3.92317e-16	1.21214e-15	8.14091	Homeostatic_Oligos
NADSYN1	0.184369	5.09675e-16	1.57156e-15	8.10917	Homeostatic_Oligos
ODF2L	0.141273	6.05518e-16	1.86457e-15	8.0882	Homeostatic_Oligos
NCK2	0.403642	6.20396e-16	1.90996e-15	8.08524	Homeostatic_Oligos
ARNT	0.152221	7.35734e-16	2.26048e-15	8.06444	Homeostatic_Oligos
CCDC57	0.348393	7.61294e-16	2.33849e-15	8.06026	Homeostatic_Oligos
KATNBL1	0.0894583	7.75987e-16	2.38309e-15	8.05793	Homeostatic_Oligos
NCAM2	0.0493776	8.43067e-16	2.58794e-15	8.04778	Homeostatic_Oligos
DICER1	0.0238936	8.73146e-16	2.67968e-15	8.04349	Homeostatic_Oligos
COLQ	0.32348	1.0535e-15	3.22885e-15	8.02046	Homeostatic_Oligos
ARHGEF37	0.103311	1.08674e-15	3.3285e-15	8.01664	Homeostatic_Oligos
C1orf159	0.238878	1.10251e-15	3.37606e-15	8.01487	Homeostatic_Oligos
EOGT	0.440184	1.28881e-15	3.94215e-15	7.99566	Homeostatic_Oligos
SOX6	0.288296	1.42579e-15	4.3592e-15	7.98321	Homeostatic_Oligos
LRFN5	0.613684	1.45602e-15	4.44962e-15	7.98062	Homeostatic_Oligos
MMS19	0.156274	1.47626e-15	4.50949e-15	7.97891	Homeostatic_Oligos
GFAP	0.258421	1.50837e-15	4.60654e-15	7.97626	Homeostatic_Oligos
SPTBN4	0.350098	1.54684e-15	4.72089e-15	7.97315	Homeostatic_Oligos
DMGDH	0.376636	1.58559e-15	4.83701e-15	7.97009	Homeostatic_Oligos
ZNF277	0.142171	1.96155e-15	5.97462e-15	7.94375	Homeostatic_Oligos
PTPN4	0.10489	2.21436e-15	6.74165e-15	7.92871	Homeostatic_Oligos
CCDC93	0.189745	2.29359e-15	6.98132e-15	7.92434	Homeostatic_Oligos
SORBS2	0.583759	2.65504e-15	8.07258e-15	7.90613	Homeostatic_Oligos
MMD2	0.589878	2.68143e-15	8.15104e-15	7.9049	Homeostatic_Oligos
NAA35	0.123539	2.85564e-15	8.67866e-15	7.89706	Homeostatic_Oligos
GGT7	0.190795	3.32491e-15	1.00825e-14	7.87806	Homeostatic_Oligos
GRAMD1B	0.73248	4.11883e-15	1.24708e-14	7.85126	Homeostatic_Oligos
UTRN	0.93644	4.26058e-15	1.28858e-14	7.84701	Homeostatic_Oligos
BMS1	0.224213	4.43715e-15	1.34169e-14	7.84192	Homeostatic_Oligos
KCNN2	0.558301	4.7606e-15	1.43822e-14	7.83308	Homeostatic_Oligos
GIT2	0.176329	5.26473e-15	1.58948e-14	7.82042	Homeostatic_Oligos
UIMC1	0.148173	5.71829e-15	1.7249e-14	7.81001	Homeostatic_Oligos
ZNF398	0.223839	5.96881e-15	1.79928e-14	7.80461	Homeostatic_Oligos
PLXND1	0.24688	6.70402e-15	2.01958e-14	7.78994	Homeostatic_Oligos
ZNF785	0.316831	6.75605e-15	2.03481e-14	7.78896	Homeostatic_Oligos
ABL1	0.0910876	6.78493e-15	2.04306e-14	7.78843	Homeostatic_Oligos
GAK	0.216094	7.25217e-15	2.18328e-14	7.78	Homeostatic_Oligos
ADCK1	0.214982	7.37011e-15	2.21829e-14	7.77796	Homeostatic_Oligos
ZNF33A	0.120975	8.25941e-15	2.48161e-14	7.76354	Homeostatic_Oligos
SCN9A	0.720074	8.38525e-15	2.51832e-14	7.76162	Homeostatic_Oligos
ATP1B3	0.196205	8.84448e-15	2.65508e-14	7.75485	Homeostatic_Oligos
FGFR2	0.0193757	8.93079e-15	2.68041e-14	7.75362	Homeostatic_Oligos
MBTD1	0.11916	9.55253e-15	2.86389e-14	7.74508	Homeostatic_Oligos
TRIM4	0.235044	9.97483e-15	2.98919e-14	7.73958	Homeostatic_Oligos
SEC22A	0.177792	1.11344e-14	3.3345e-14	7.72558	Homeostatic_Oligos
SNTG1	0.363283	1.11905e-14	3.35058e-14	7.72494	Homeostatic_Oligos
BRD4	0.148289	1.20458e-14	3.60429e-14	7.71555	Homeostatic_Oligos
FAM124A	0.030291	1.25226e-14	3.74532e-14	7.7106	Homeostatic_Oligos
RIPK1	0.276792	1.26846e-14	3.79213e-14	7.70896	Homeostatic_Oligos
ALDH8A1	0.314883	1.30158e-14	3.89029e-14	7.70567	Homeostatic_Oligos
ADAM28	1.46066	1.33067e-14	3.97553e-14	7.70285	Homeostatic_Oligos
AHCTF1	0.14096	1.44818e-14	4.3247e-14	7.69203	Homeostatic_Oligos
ST6GAL1	1.03282	1.55175e-14	4.631e-14	7.68319	Homeostatic_Oligos
ABL2	0.151576	1.80112e-14	5.37288e-14	7.66408	Homeostatic_Oligos
SEC24B	0.115429	1.82375e-14	5.43801e-14	7.66248	Homeostatic_Oligos
EML4	0.230543	1.89144e-14	5.63865e-14	7.6578	Homeostatic_Oligos
CDC27	0.112808	1.97367e-14	5.88251e-14	7.65233	Homeostatic_Oligos
OPCML	0.226802	2.21056e-14	6.58141e-14	7.63775	Homeostatic_Oligos
GPR135	0.229112	2.43578e-14	7.24568e-14	7.62524	Homeostatic_Oligos
XPR1	0.170224	2.59679e-14	7.72127e-14	7.61698	Homeostatic_Oligos
SFXN5	0.20415	2.85052e-14	8.47188e-14	7.60493	Homeostatic_Oligos
WDR37	0.14427	2.91841e-14	8.66634e-14	7.60189	Homeostatic_Oligos
MPPED2	0.521445	2.95969e-14	8.78323e-14	7.60007	Homeostatic_Oligos
GPD2	0.180729	3.27624e-14	9.72052e-14	7.58691	Homeostatic_Oligos
SPATA7	0.165814	3.30004e-14	9.78902e-14	7.58597	Homeostatic_Oligos
TBC1D22B	0.242934	3.38298e-14	1.00286e-13	7.58275	Homeostatic_Oligos
AKAP7	0.133569	3.52625e-14	1.04488e-13	7.57737	Homeostatic_Oligos
RGS6	0.577927	3.54106e-14	1.04904e-13	7.57683	Homeostatic_Oligos
ARFGEF2	0.127802	3.83415e-14	1.13489e-13	7.5665	Homeostatic_Oligos
DOCK8	1.14709	4.15355e-14	1.2289e-13	7.55609	Homeostatic_Oligos
NR2C1	0.156826	4.38726e-14	1.29721e-13	7.54897	Homeostatic_Oligos
NKD1	0.226279	4.54881e-14	1.3444e-13	7.54425	Homeostatic_Oligos
GTF3C2	0.246513	4.71087e-14	1.3917e-13	7.53969	Homeostatic_Oligos
MAP3K13	0.136097	5.30044e-14	1.56452e-13	7.5243	Homeostatic_Oligos
MAX	0.120396	5.43619e-14	1.60425e-13	7.52099	Homeostatic_Oligos
ZNF235	0.180542	6.06179e-14	1.78656e-13	7.50674	Homeostatic_Oligos
SCG2	0.673068	6.15617e-14	1.81399e-13	7.50472	Homeostatic_Oligos
CCDC149	0.210933	7.76516e-14	2.28614e-13	7.47424	Homeostatic_Oligos
CYBRD1	0.173151	8.60746e-14	2.53249e-13	7.46068	Homeostatic_Oligos
NPAS2	1.16082	1.01485e-13	2.98143e-13	7.43895	Homeostatic_Oligos
PPIP5K2	0.113566	1.03442e-13	3.03827e-13	7.43643	Homeostatic_Oligos
MARK2	0.13651	1.05861e-13	3.10866e-13	7.43338	Homeostatic_Oligos
PDE9A	0.275985	1.07472e-13	3.15528e-13	7.43138	Homeostatic_Oligos
SLAIN1	0.00985153	1.18852e-13	3.4879e-13	7.41806	Homeostatic_Oligos
GRM5	0.365707	1.21276e-13	3.55752e-13	7.41538	Homeostatic_Oligos
FGGY	0.177639	1.21343e-13	3.55874e-13	7.41531	Homeostatic_Oligos
NTRK3	0.561181	1.24177e-13	3.63876e-13	7.41225	Homeostatic_Oligos
CCDC146	0.157658	1.35633e-13	3.9702e-13	7.40054	Homeostatic_Oligos
EPC2	0.0988086	1.40069e-13	4.09918e-13	7.39626	Homeostatic_Oligos
ZKSCAN1	0.033136	1.47465e-13	4.31196e-13	7.38943	Homeostatic_Oligos
RAF1	0.116346	1.64588e-13	4.80347e-13	7.3748	Homeostatic_Oligos
DHRS7B	0.251071	1.75287e-13	5.11353e-13	7.36641	Homeostatic_Oligos
SARM1	0.305728	1.89265e-13	5.5131e-13	7.35617	Homeostatic_Oligos
NEK9	0.137186	1.94256e-13	5.65731e-13	7.35269	Homeostatic_Oligos
MBD2	0.159637	1.95127e-13	5.68025e-13	7.35209	Homeostatic_Oligos
FAM184A	0.285642	2.17635e-13	6.32876e-13	7.33749	Homeostatic_Oligos
MCPH1	0.135614	2.42188e-13	7.03385e-13	7.32317	Homeostatic_Oligos
MZF1	0.239882	2.47579e-13	7.1889e-13	7.32021	Homeostatic_Oligos
ZNF587	0.276579	2.50257e-13	7.26511e-13	7.31877	Homeostatic_Oligos
RIMS1	0.0829544	2.54845e-13	7.39206e-13	7.31633	Homeostatic_Oligos
MYOM1	0.424671	2.7349e-13	7.92954e-13	7.30684	Homeostatic_Oligos
ARHGAP32	0.111936	2.74154e-13	7.94711e-13	7.30652	Homeostatic_Oligos
FBXW8	0.220348	2.92542e-13	8.47656e-13	7.29779	Homeostatic_Oligos
ZNF710	0.221774	3.3569e-13	9.71655e-13	7.27925	Homeostatic_Oligos
RCL1	0.169867	3.65612e-13	1.0576e-12	7.26772	Homeostatic_Oligos
RTN4IP1	0.275187	3.84223e-13	1.11097e-12	7.26101	Homeostatic_Oligos
RAB27A	0.366006	3.95491e-13	1.14283e-12	7.2571	Homeostatic_Oligos
ZFYVE9	0.183399	4.05516e-13	1.1713e-12	7.25371	Homeostatic_Oligos
COBL	0.0282053	4.45375e-13	1.28562e-12	7.241	Homeostatic_Oligos
AFAP1	0.518488	4.62763e-13	1.33525e-12	7.23581	Homeostatic_Oligos
SLC9B1	0.191895	4.85951e-13	1.40186e-12	7.22917	Homeostatic_Oligos
ZNF621	0.171604	5.21288e-13	1.50349e-12	7.21963	Homeostatic_Oligos
MBOAT2	0.038821	5.46057e-13	1.57394e-12	7.21332	Homeostatic_Oligos
KNOP1	0.0899379	5.91773e-13	1.70392e-12	7.20236	Homeostatic_Oligos
SLC35F1	0.470951	6.51931e-13	1.87478e-12	7.18916	Homeostatic_Oligos
HS6ST3	0.463433	6.54257e-13	1.88107e-12	7.18867	Homeostatic_Oligos
ABCA10	0.349639	6.64821e-13	1.91025e-12	7.18648	Homeostatic_Oligos
PPARA	0.231975	6.84933e-13	1.9668e-12	7.18241	Homeostatic_Oligos
TCF7L2	0.175505	7.15348e-13	2.05328e-12	7.17647	Homeostatic_Oligos
HMBOX1	0.0714252	8.0472e-13	2.30836e-12	7.16035	Homeostatic_Oligos
EIF2B3	0.180733	8.31954e-13	2.38599e-12	7.15579	Homeostatic_Oligos
DNAJC11	0.212396	8.67229e-13	2.48664e-12	7.15009	Homeostatic_Oligos
ZFP90	0.175894	9.16867e-13	2.62841e-12	7.14244	Homeostatic_Oligos
SLC4A7	0.255047	9.45515e-13	2.70772e-12	7.13821	Homeostatic_Oligos
ZNF765	0.313731	1.05829e-12	3.02625e-12	7.12271	Homeostatic_Oligos
IQCB1	0.15199	1.11336e-12	3.18242e-12	7.11571	Homeostatic_Oligos
TTC23	0.253336	1.44618e-12	4.11919e-12	7.07956	Homeostatic_Oligos
CEP95	0.133958	1.52312e-12	4.33654e-12	7.07237	Homeostatic_Oligos
TAF3	0.145265	1.5292e-12	4.35296e-12	7.07182	Homeostatic_Oligos
MAP4K5	0.0221645	1.85366e-12	5.26563e-12	7.04507	Homeostatic_Oligos
FOXK1	0.136498	1.92451e-12	5.46352e-12	7.03985	Homeostatic_Oligos
RFX4	0.662549	1.95578e-12	5.55114e-12	7.0376	Homeostatic_Oligos
SATB2	0.186678	2.04161e-12	5.79354e-12	7.03161	Homeostatic_Oligos
LINGO2	0.511783	2.11159e-12	5.98966e-12	7.02691	Homeostatic_Oligos
ARMC2	0.277809	2.21358e-12	6.27508e-12	7.02032	Homeostatic_Oligos
PHTF2	0.0763329	2.43944e-12	6.90395e-12	7.00673	Homeostatic_Oligos
GPBP1L1	0.0983995	2.56199e-12	7.2493e-12	6.99987	Homeostatic_Oligos
KDM5A	0.0961836	2.65542e-12	7.51058e-12	6.99485	Homeostatic_Oligos
BCAS1	0.0132293	2.65961e-12	7.51934e-12	6.99463	Homeostatic_Oligos
CEP128	0.137059	2.75227e-12	7.77651e-12	6.98983	Homeostatic_Oligos
CTBP2	0.0940796	2.75327e-12	7.77775e-12	6.98978	Homeostatic_Oligos
AGAP4	0.291671	2.80057e-12	7.9081e-12	6.98738	Homeostatic_Oligos
MCC	0.39821	2.89021e-12	8.15788e-12	6.98296	Homeostatic_Oligos
RNLS	0.173359	3.08875e-12	8.71289e-12	6.97363	Homeostatic_Oligos
TEX9	0.276325	4.15477e-12	1.16721e-11	6.93181	Homeostatic_Oligos
TMEM62	0.177812	4.16809e-12	1.17071e-11	6.93136	Homeostatic_Oligos
TTLL9	0.214901	4.18169e-12	1.17429e-11	6.9309	Homeostatic_Oligos
PTPN11	0.0759921	4.60973e-12	1.29264e-11	6.9171	Homeostatic_Oligos
HOXD3	0.42681	4.78974e-12	1.34257e-11	6.91167	Homeostatic_Oligos
BIN3	0.340473	4.9947e-12	1.39974e-11	6.90573	Homeostatic_Oligos
TUBD1	0.248654	5.02649e-12	1.40779e-11	6.90483	Homeostatic_Oligos
ZNF544	0.271128	5.04054e-12	1.41143e-11	6.90443	Homeostatic_Oligos
EP400	0.122748	5.2849e-12	1.47925e-11	6.89771	Homeostatic_Oligos
COPG2	0.158233	5.33925e-12	1.49416e-11	6.89625	Homeostatic_Oligos
ZEB1	0.60328	6.81301e-12	1.90272e-11	6.86152	Homeostatic_Oligos
NIPBL	0.0281867	6.87399e-12	1.91936e-11	6.86025	Homeostatic_Oligos
EIF4E3	0.279806	7.27733e-12	2.0295e-11	6.8521	Homeostatic_Oligos
PIK3C2A	0.0897617	7.52712e-12	2.09789e-11	6.84727	Homeostatic_Oligos
NEMF	0.0696301	7.80549e-12	2.17503e-11	6.84207	Homeostatic_Oligos
TUBGCP3	0.129187	9.03876e-12	2.51461e-11	6.82103	Homeostatic_Oligos
AVEN	0.152138	9.93638e-12	2.76042e-11	6.80742	Homeostatic_Oligos
DDX60	0.799315	1.00039e-11	2.77861e-11	6.80645	Homeostatic_Oligos
PHLPP2	0.220773	1.05955e-11	2.94174e-11	6.79817	Homeostatic_Oligos
APPBP2	0.0571531	1.0766e-11	2.98728e-11	6.79587	Homeostatic_Oligos
PSPH	0.265647	1.10724e-11	3.07168e-11	6.79182	Homeostatic_Oligos
KLHDC4	0.268659	1.17186e-11	3.24832e-11	6.78364	Homeostatic_Oligos
TBC1D8	0.247595	1.21663e-11	3.37173e-11	6.77822	Homeostatic_Oligos
ANAPC4	0.135992	1.23566e-11	3.42239e-11	6.77598	Homeostatic_Oligos
ANKRD10	0.0590047	1.28783e-11	3.56331e-11	6.77	Homeostatic_Oligos
DCAF6	0.118122	1.30389e-11	3.60629e-11	6.76821	Homeostatic_Oligos
RCOR3	0.0575127	1.33993e-11	3.70373e-11	6.76426	Homeostatic_Oligos
ESRRG	0.0857204	1.37304e-11	3.79374e-11	6.76072	Homeostatic_Oligos
MGAT4C	0.508597	1.43462e-11	3.96309e-11	6.75436	Homeostatic_Oligos
IFT52	0.21913	1.46905e-11	4.05737e-11	6.75093	Homeostatic_Oligos
MAPRE2	0.0300418	1.50813e-11	4.16448e-11	6.74712	Homeostatic_Oligos
GSAP	0.268183	1.56858e-11	4.32967e-11	6.74141	Homeostatic_Oligos
PDZD2	0.125638	1.75472e-11	4.8415e-11	6.7251	Homeostatic_Oligos
IPO9	0.127189	1.7707e-11	4.88266e-11	6.72378	Homeostatic_Oligos
LMBR1	0.115693	1.78274e-11	4.91388e-11	6.72279	Homeostatic_Oligos
UBE3D	0.146275	1.89412e-11	5.21358e-11	6.71396	Homeostatic_Oligos
DEPDC1B	0.368643	2.02302e-11	5.55945e-11	6.70435	Homeostatic_Oligos
CCDC30	0.195641	2.12219e-11	5.83083e-11	6.69736	Homeostatic_Oligos
RSF1	0.0648141	2.14485e-11	5.89083e-11	6.69581	Homeostatic_Oligos
ANAPC10	0.164631	2.14489e-11	5.89083e-11	6.6958	Homeostatic_Oligos
PACS1	0.190313	2.1848e-11	5.99805e-11	6.69311	Homeostatic_Oligos
PPIL2	0.204605	2.19243e-11	6.0178e-11	6.6926	Homeostatic_Oligos
USP48	0.0616636	2.21955e-11	6.09103e-11	6.6908	Homeostatic_Oligos
HS3ST4	0.818885	2.29907e-11	6.30547e-11	6.68565	Homeostatic_Oligos
TCP11L2	0.0934639	2.30389e-11	6.31743e-11	6.68534	Homeostatic_Oligos
SLC37A3	0.24238	2.31328e-11	6.3419e-11	6.68474	Homeostatic_Oligos
GPR89B	0.238213	2.35563e-11	6.45543e-11	6.68209	Homeostatic_Oligos
RB1	0.0943229	2.4158e-11	6.61769e-11	6.67839	Homeostatic_Oligos
PRDM5	0.48157	2.58242e-11	7.07131e-11	6.66861	Homeostatic_Oligos
PRKCE	0.113768	2.71668e-11	7.43598e-11	6.66116	Homeostatic_Oligos
ZNF431	0.13192	2.80418e-11	7.67396e-11	6.6565	Homeostatic_Oligos
CEP89	0.25706	3.00783e-11	8.22286e-11	6.64619	Homeostatic_Oligos
CAMSAP2	0.061549	3.53237e-11	9.64177e-11	6.62247	Homeostatic_Oligos
PRTFDC1	0.0930521	3.74616e-11	1.02192e-10	6.61378	Homeostatic_Oligos
COA1	0.116465	4.05724e-11	1.10612e-10	6.60197	Homeostatic_Oligos
UBASH3B	0.762573	4.50626e-11	1.22708e-10	6.5864	Homeostatic_Oligos
CERS6	0.435412	5.00741e-11	1.36193e-10	6.57072	Homeostatic_Oligos
RHOT1	0.117495	5.54958e-11	1.50819e-10	6.55539	Homeostatic_Oligos
GSN	0.00527588	5.96619e-11	1.61918e-10	6.54458	Homeostatic_Oligos
NPEPPS	0.0756103	5.98164e-11	1.62305e-10	6.5442	Homeostatic_Oligos
MICALL1	0.265509	6.31574e-11	1.71336e-10	6.53607	Homeostatic_Oligos
TMEM150C	0.294707	6.67751e-11	1.81079e-10	6.52773	Homeostatic_Oligos
NPIPB15	0.547112	6.77634e-11	1.83687e-10	6.52553	Homeostatic_Oligos
ASXL2	0.113663	6.88051e-11	1.86474e-10	6.52324	Homeostatic_Oligos
PPARD	0.157615	7.28471e-11	1.9721e-10	6.51468	Homeostatic_Oligos
LARS2	0.216338	7.37615e-11	1.99631e-10	6.5128	Homeostatic_Oligos
GRK5	0.565391	7.64367e-11	2.0679e-10	6.50745	Homeostatic_Oligos
SSH1	0.233567	7.94533e-11	2.14866e-10	6.50163	Homeostatic_Oligos
AP3D1	0.189261	9.11692e-11	2.46307e-10	6.48091	Homeostatic_Oligos
APBB1IP	1.05929	9.1943e-11	2.483e-10	6.47964	Homeostatic_Oligos
TPK1	0.190978	9.8432e-11	2.65616e-10	6.46934	Homeostatic_Oligos
STK40	0.337751	1.00584e-10	2.71316e-10	6.46607	Homeostatic_Oligos
TFAP2E	0.312	1.02754e-10	2.77062e-10	6.46284	Homeostatic_Oligos
COG7	0.156238	1.04566e-10	2.81891e-10	6.4602	Homeostatic_Oligos
CDC73	0.0771291	1.08345e-10	2.91965e-10	6.45482	Homeostatic_Oligos
ASCC1	0.122713	1.19644e-10	3.22033e-10	6.43978	Homeostatic_Oligos
PIK3C2B	0.0634783	1.25621e-10	3.37988e-10	6.43238	Homeostatic_Oligos
STX5	0.248588	1.35416e-10	3.63914e-10	6.42096	Homeostatic_Oligos
DTNBP1	0.195531	1.36553e-10	3.66898e-10	6.41969	Homeostatic_Oligos
NPL	0.277103	1.37634e-10	3.69731e-10	6.41849	Homeostatic_Oligos
SLC9B2	0.301978	1.37859e-10	3.70265e-10	6.41824	Homeostatic_Oligos
MED15	0.136324	1.39055e-10	3.73403e-10	6.41692	Homeostatic_Oligos
ZNF148	0.0547422	1.40213e-10	3.76292e-10	6.41566	Homeostatic_Oligos
RBMS2	0.342597	1.47955e-10	3.96914e-10	6.40747	Homeostatic_Oligos
PILRA	0.344541	1.50747e-10	4.04247e-10	6.40462	Homeostatic_Oligos
LRRC49	0.193398	1.55801e-10	4.17717e-10	6.39958	Homeostatic_Oligos
ZNF44	0.14554	1.60925e-10	4.31372e-10	6.39464	Homeostatic_Oligos
DDX60L	0.84183	1.63876e-10	4.39198e-10	6.39186	Homeostatic_Oligos
SPATS2	0.222503	1.80448e-10	4.83235e-10	6.37712	Homeostatic_Oligos
QRICH2	0.531103	1.82604e-10	4.88913e-10	6.3753	Homeostatic_Oligos
PSME4	0.0418711	1.87901e-10	5.02997e-10	6.37092	Homeostatic_Oligos
MCU	0.181362	1.93025e-10	5.16612e-10	6.36679	Homeostatic_Oligos
SP100	0.559315	1.99068e-10	5.32578e-10	6.36206	Homeostatic_Oligos
BNC2	1.14926	2.00677e-10	5.36674e-10	6.36082	Homeostatic_Oligos
PSMG4	0.155062	2.22178e-10	5.93022e-10	6.34517	Homeostatic_Oligos
PARP11	0.231714	2.49451e-10	6.64526e-10	6.32732	Homeostatic_Oligos
KREMEN1	0.355606	2.59297e-10	6.90219e-10	6.32134	Homeostatic_Oligos
SLC35F5	0.0735152	2.66368e-10	7.08768e-10	6.31719	Homeostatic_Oligos
TPD52	0.0547676	2.66549e-10	7.09113e-10	6.31708	Homeostatic_Oligos
ODF2	0.334473	2.86424e-10	7.61544e-10	6.30595	Homeostatic_Oligos
PDS5B	0.0592074	2.91012e-10	7.73315e-10	6.30349	Homeostatic_Oligos
METTL8	0.17799	2.9102e-10	7.73315e-10	6.30349	Homeostatic_Oligos
HERC6	0.645756	2.95751e-10	7.85735e-10	6.30099	Homeostatic_Oligos
WWTR1	0.244873	3.0228e-10	8.0277e-10	6.29761	Homeostatic_Oligos
KIAA1958	0.0558006	3.06306e-10	8.1315e-10	6.29555	Homeostatic_Oligos
ATE1	0.0331522	3.67437e-10	9.74304e-10	6.26727	Homeostatic_Oligos
MYEF2	0.120186	3.79014e-10	1.00403e-09	6.26243	Homeostatic_Oligos
CLSTN2	0.288725	3.90888e-10	1.03509e-09	6.25762	Homeostatic_Oligos
VRK2	0.0354968	3.97532e-10	1.05248e-09	6.25499	Homeostatic_Oligos
MEF2A	0.0377049	4.18629e-10	1.10791e-09	6.24692	Homeostatic_Oligos
PRKCI	0.176258	4.44858e-10	1.1771e-09	6.23742	Homeostatic_Oligos
NSMAF	0.14411	4.68726e-10	1.23858e-09	6.22923	Homeostatic_Oligos
ATF7IP	0.0594693	4.80517e-10	1.2695e-09	6.22534	Homeostatic_Oligos
NLK	0.0163451	4.94149e-10	1.30476e-09	6.22095	Homeostatic_Oligos
CMTM4	0.150059	5.29174e-10	1.39536e-09	6.2102	Homeostatic_Oligos
DTX4	0.144503	5.3373e-10	1.40684e-09	6.20885	Homeostatic_Oligos
PRIM2	0.148216	5.46885e-10	1.44096e-09	6.20502	Homeostatic_Oligos
FBXL18	0.181567	5.59476e-10	1.47357e-09	6.20144	Homeostatic_Oligos
CREM	0.196256	5.85099e-10	1.53987e-09	6.19439	Homeostatic_Oligos
XYLB	0.299197	5.86373e-10	1.54293e-09	6.19405	Homeostatic_Oligos
NPTX2	0.229527	6.0853e-10	1.60062e-09	6.18821	Homeostatic_Oligos
LDB2	0.269239	6.22822e-10	1.6379e-09	6.18454	Homeostatic_Oligos
ZNF730	0.605115	6.48993e-10	1.70575e-09	6.17805	Homeostatic_Oligos
YY1AP1	0.127756	6.73495e-10	1.76947e-09	6.17219	Homeostatic_Oligos
ABCC8	0.426358	6.77783e-10	1.7804e-09	6.17119	Homeostatic_Oligos
NUP93	0.185064	6.81975e-10	1.79106e-09	6.17021	Homeostatic_Oligos
CELF1	0.113725	7.06486e-10	1.85473e-09	6.16463	Homeostatic_Oligos
ZNF155	0.234734	7.07119e-10	1.85604e-09	6.16449	Homeostatic_Oligos
ZNF611	0.224559	7.18116e-10	1.88418e-09	6.16204	Homeostatic_Oligos
ABAT	0.227268	7.70242e-10	2.0194e-09	6.15094	Homeostatic_Oligos
ARID2	0.0478658	7.70768e-10	2.0204e-09	6.15083	Homeostatic_Oligos
ANAPC1	0.15361	7.81284e-10	2.04758e-09	6.14868	Homeostatic_Oligos
DNAJC13	0.115949	9.53362e-10	2.49522e-09	6.11703	Homeostatic_Oligos
DACH1	0.626866	9.84015e-10	2.57398e-09	6.11198	Homeostatic_Oligos
OR2L2	0.435084	1.18782e-09	3.10297e-09	6.08188	Homeostatic_Oligos
FREM1	0.519098	1.21949e-09	3.18509e-09	6.07766	Homeostatic_Oligos
TCF25	0.0836149	1.34887e-09	3.52099e-09	6.06147	Homeostatic_Oligos
ZCCHC14	0.173066	1.36927e-09	3.57356e-09	6.05905	Homeostatic_Oligos
CDKL2	0.151698	1.51601e-09	3.95279e-09	6.04265	Homeostatic_Oligos
BCAR3	0.391676	1.52535e-09	3.97638e-09	6.04166	Homeostatic_Oligos
FAM13A	0.260868	1.60446e-09	4.18023e-09	6.0335	Homeostatic_Oligos
PID1	0.751338	1.61785e-09	4.21352e-09	6.03216	Homeostatic_Oligos
DUS2	0.354441	1.8873e-09	4.90504e-09	6.00722	Homeostatic_Oligos
DCLK1	0.303066	2.30083e-09	5.9753e-09	5.975	Homeostatic_Oligos
LRCH1	0.315825	2.42836e-09	6.30291e-09	5.9662	Homeostatic_Oligos
SHPRH	0.055609	2.47659e-09	6.42203e-09	5.96299	Homeostatic_Oligos
RADIL	0.624676	2.65766e-09	6.88638e-09	5.95146	Homeostatic_Oligos
PCGF6	0.295707	2.67306e-09	6.92366e-09	5.95051	Homeostatic_Oligos
NTNG2	0.187279	2.70135e-09	6.99563e-09	5.94879	Homeostatic_Oligos
LUZP1	0.496792	2.76716e-09	7.16469e-09	5.94485	Homeostatic_Oligos
BAZ1A	0.16636	2.95868e-09	7.65769e-09	5.93387	Homeostatic_Oligos
TSGA10	0.0914894	2.9931e-09	7.74531e-09	5.93198	Homeostatic_Oligos
ZFR	0.0346817	2.99965e-09	7.7608e-09	5.93162	Homeostatic_Oligos
PUS7	0.213436	3.23489e-09	8.36314e-09	5.91921	Homeostatic_Oligos
LEPR	0.303492	3.29199e-09	8.50595e-09	5.91633	Homeostatic_Oligos
BTBD2	0.246474	3.4036e-09	8.79104e-09	5.91084	Homeostatic_Oligos
SWT1	0.139954	3.40562e-09	8.7946e-09	5.91075	Homeostatic_Oligos
UPF3A	0.0614313	3.46972e-09	8.95678e-09	5.90767	Homeostatic_Oligos
NOL10	0.140427	3.48552e-09	8.99586e-09	5.90693	Homeostatic_Oligos
CCDC148	0.217481	3.7131e-09	9.57783e-09	5.89649	Homeostatic_Oligos
ACTR3B	0.210125	3.7713e-09	9.72613e-09	5.89392	Homeostatic_Oligos
IFI44	0.608327	3.85783e-09	9.94556e-09	5.89018	Homeostatic_Oligos
ALDH1A2	0.339026	3.93319e-09	1.01379e-08	5.88698	Homeostatic_Oligos
ZNF827	0.0907865	3.99247e-09	1.02869e-08	5.8845	Homeostatic_Oligos
TMEM108	0.270716	4.02154e-09	1.03579e-08	5.88331	Homeostatic_Oligos
CNTNAP5	0.395131	4.38108e-09	1.12628e-08	5.86912	Homeostatic_Oligos
PREP	0.238674	4.55181e-09	1.16995e-08	5.86278	Homeostatic_Oligos
PMM2	0.193552	4.71253e-09	1.21059e-08	5.85702	Homeostatic_Oligos
SYT9	0.0672862	4.92706e-09	1.26499e-08	5.84962	Homeostatic_Oligos
CHI3L2	1.74858	5.07962e-09	1.30391e-08	5.84454	Homeostatic_Oligos
PENK	1.65294	5.11572e-09	1.31269e-08	5.84336	Homeostatic_Oligos
HEATR5B	0.111995	5.58842e-09	1.43104e-08	5.82863	Homeostatic_Oligos
AGMO	0.175148	5.92521e-09	1.51672e-08	5.81886	Homeostatic_Oligos
GATAD2A	0.220907	6.5683e-09	1.6804e-08	5.80161	Homeostatic_Oligos
PI16	0.136314	6.90438e-09	1.76441e-08	5.79323	Homeostatic_Oligos
NCOR2	0.0764153	6.93703e-09	1.77242e-08	5.79244	Homeostatic_Oligos
RALGAPB	0.0905679	7.04414e-09	1.79879e-08	5.78987	Homeostatic_Oligos
ANKRD24	0.51392	7.14268e-09	1.82327e-08	5.78754	Homeostatic_Oligos
CAMK1D	0.450352	7.28949e-09	1.86006e-08	5.78412	Homeostatic_Oligos
ASTN1	0.200407	7.5267e-09	1.91987e-08	5.77873	Homeostatic_Oligos
RBM47	0.990433	7.81341e-09	1.9919e-08	5.77243	Homeostatic_Oligos
ZNF627	0.280789	7.88111e-09	2.00878e-08	5.77098	Homeostatic_Oligos
WDR49	0.922151	8.0246e-09	2.0446e-08	5.76794	Homeostatic_Oligos
ERBB4	0.0402698	8.08097e-09	2.05858e-08	5.76676	Homeostatic_Oligos
PHF12	0.153382	8.19227e-09	2.08655e-08	5.76445	Homeostatic_Oligos
PGM5	0.44379	8.71916e-09	2.21869e-08	5.75393	Homeostatic_Oligos
POU2AF1	0.266088	8.75551e-09	2.22753e-08	5.75323	Homeostatic_Oligos
ZNF385D	0.530318	9.09764e-09	2.31371e-08	5.74675	Homeostatic_Oligos
C19orf18	0.336741	9.30184e-09	2.36521e-08	5.74299	Homeostatic_Oligos
WBP1L	0.194367	9.59748e-09	2.43948e-08	5.73769	Homeostatic_Oligos
GRIK2	0.0911211	9.76939e-09	2.48226e-08	5.73468	Homeostatic_Oligos
STARD4	0.250647	9.82795e-09	2.49667e-08	5.73367	Homeostatic_Oligos
FYN	0.0428986	1.0365e-08	2.63115e-08	5.72465	Homeostatic_Oligos
OGDH	0.148444	1.12908e-08	2.86246e-08	5.7101	Homeostatic_Oligos
TIPIN	0.303743	1.20505e-08	3.05339e-08	5.69901	Homeostatic_Oligos
MAP3K4	0.110428	1.21922e-08	3.08872e-08	5.69702	Homeostatic_Oligos
BRINP3	0.680477	1.25014e-08	3.16648e-08	5.69274	Homeostatic_Oligos
DNASE1	0.160387	1.25541e-08	3.17924e-08	5.69203	Homeostatic_Oligos
PIK3C3	0.0632089	1.29337e-08	3.27356e-08	5.68694	Homeostatic_Oligos
TRIOBP	0.243417	1.29596e-08	3.27951e-08	5.6866	Homeostatic_Oligos
MYH9	0.160939	1.2971e-08	3.28177e-08	5.68645	Homeostatic_Oligos
SLC41A2	0.499021	1.40824e-08	3.55905e-08	5.67238	Homeostatic_Oligos
VWC2L	1.00662	1.52238e-08	3.84328e-08	5.65902	Homeostatic_Oligos
FBXO16	0.695504	1.55061e-08	3.91239e-08	5.65587	Homeostatic_Oligos
FCHO1	0.119684	1.5965e-08	4.02744e-08	5.65086	Homeostatic_Oligos
TMEM184B	0.081154	1.6177e-08	4.08017e-08	5.64859	Homeostatic_Oligos
ADAMTS12	0.256501	1.86258e-08	4.69005e-08	5.6243	Homeostatic_Oligos
PTPRH	0.526807	1.96621e-08	4.94648e-08	5.61495	Homeostatic_Oligos
EPHA7	0.487936	2.46382e-08	6.18701e-08	5.57581	Homeostatic_Oligos
PPP2R5E	0.0820335	2.47707e-08	6.21915e-08	5.57488	Homeostatic_Oligos
ARHGAP44	0.32344	2.60931e-08	6.54637e-08	5.56581	Homeostatic_Oligos
UBAC2	0.103739	2.63774e-08	6.6165e-08	5.56392	Homeostatic_Oligos
FAM174B	0.173004	2.69442e-08	6.75742e-08	5.56022	Homeostatic_Oligos
FOXN3	0.0892818	2.81562e-08	7.05665e-08	5.55253	Homeostatic_Oligos
ABLIM1	0.456007	2.85184e-08	7.14572e-08	5.5503	Homeostatic_Oligos
MYO16	0.568033	2.86874e-08	7.18544e-08	5.54926	Homeostatic_Oligos
MOK	0.444737	3.02678e-08	7.57577e-08	5.53988	Homeostatic_Oligos
ERCC8	0.130452	3.34253e-08	8.35845e-08	5.52248	Homeostatic_Oligos
ZNF782	0.118134	3.43466e-08	8.58571e-08	5.5177	Homeostatic_Oligos
SEC23A	0.132893	3.5489e-08	8.86646e-08	5.51194	Homeostatic_Oligos
TRAF3IP1	0.2341	3.77602e-08	9.42873e-08	5.50102	Homeostatic_Oligos
EPG5	0.121704	3.82448e-08	9.548e-08	5.49877	Homeostatic_Oligos
SH3YL1	0.0819355	4.07778e-08	1.01675e-07	5.48745	Homeostatic_Oligos
HOMER2	0.289843	4.13187e-08	1.02986e-07	5.48512	Homeostatic_Oligos
EPB41	0.487933	4.32575e-08	1.07721e-07	5.47701	Homeostatic_Oligos
RAD18	0.184954	4.41868e-08	1.10015e-07	5.47325	Homeostatic_Oligos
ANKS3	0.182916	4.43452e-08	1.10389e-07	5.47261	Homeostatic_Oligos
RBMS3	0.27886	4.5286e-08	1.1269e-07	5.46889	Homeostatic_Oligos
TSHZ2	0.634148	4.69999e-08	1.16913e-07	5.4623	Homeostatic_Oligos
CDH4	0.249147	4.70845e-08	1.17102e-07	5.46198	Homeostatic_Oligos
SOX13	0.253103	4.71514e-08	1.17247e-07	5.46173	Homeostatic_Oligos
IQCH	0.326247	4.78598e-08	1.18944e-07	5.45908	Homeostatic_Oligos
PRDM2	0.0612255	5.02846e-08	1.24925e-07	5.4503	Homeostatic_Oligos
KCNMB3	0.389269	5.24668e-08	1.30253e-07	5.44274	Homeostatic_Oligos
GSE1	0.428668	5.26446e-08	1.30647e-07	5.44214	Homeostatic_Oligos
TGFBR3	0.938965	5.41632e-08	1.34367e-07	5.43707	Homeostatic_Oligos
XPO4	0.0866434	5.8683e-08	1.45448e-07	5.42277	Homeostatic_Oligos
RAB12	0.1321	6.26851e-08	1.55284e-07	5.41097	Homeostatic_Oligos
SVIL	0.267268	6.51293e-08	1.61309e-07	5.40411	Homeostatic_Oligos
NBPF15	0.475259	7.33028e-08	1.81292e-07	5.38288	Homeostatic_Oligos
ZNF141	0.133061	7.37176e-08	1.82285e-07	5.38187	Homeostatic_Oligos
PHTF1	0.347168	7.71142e-08	1.90615e-07	5.37375	Homeostatic_Oligos
PHF14	0.0377454	8.00599e-08	1.97826e-07	5.36699	Homeostatic_Oligos
TULP3	0.145082	8.2006e-08	2.02561e-07	5.36266	Homeostatic_Oligos
SCN1A	0.435897	8.27604e-08	2.04351e-07	5.361	Homeostatic_Oligos
EIF2AK4	0.173092	8.58451e-08	2.11892e-07	5.35439	Homeostatic_Oligos
METTL16	0.115377	9.56074e-08	2.3565e-07	5.33488	Homeostatic_Oligos
CSGALNACT2	0.101998	1.01179e-07	2.49158e-07	5.32459	Homeostatic_Oligos
RAD9A	0.241648	1.01708e-07	2.50417e-07	5.32365	Homeostatic_Oligos
TRANK1	0.634536	1.08492e-07	2.67024e-07	5.31189	Homeostatic_Oligos
GALNTL6	0.373532	1.09962e-07	2.70546e-07	5.30944	Homeostatic_Oligos
KDM3A	0.16197	1.19197e-07	2.93004e-07	5.29472	Homeostatic_Oligos
ELMOD3	0.127742	1.2325e-07	3.02805e-07	5.28861	Homeostatic_Oligos
CTDSPL2	0.0754835	1.32558e-07	3.25326e-07	5.27527	Homeostatic_Oligos
CCNL1	0.0922438	1.40399e-07	3.4426e-07	5.26473	Homeostatic_Oligos
PLSCR1	1.23178	1.40662e-07	3.44845e-07	5.26438	Homeostatic_Oligos
RFX2	0.296304	1.44856e-07	3.54935e-07	5.25898	Homeostatic_Oligos
BCAT2	0.217312	1.4593e-07	3.57504e-07	5.25762	Homeostatic_Oligos
VAT1L	0.377123	1.46039e-07	3.57707e-07	5.25748	Homeostatic_Oligos
CPS1	0.269707	1.47338e-07	3.60761e-07	5.25586	Homeostatic_Oligos
CACNA2D3	0.390111	1.57541e-07	3.85124e-07	5.24352	Homeostatic_Oligos
SST	0.645023	1.57973e-07	3.86113e-07	5.24302	Homeostatic_Oligos
INPP4B	0.136052	1.6462e-07	4.02143e-07	5.23541	Homeostatic_Oligos
MPHOSPH8	0.0718216	1.67273e-07	4.08408e-07	5.23246	Homeostatic_Oligos
KIFC3	0.183029	1.72559e-07	4.21238e-07	5.2267	Homeostatic_Oligos
JARID2	0.0610182	1.7862e-07	4.35571e-07	5.22031	Homeostatic_Oligos
YTHDC2	0.0729235	1.86459e-07	4.54284e-07	5.21235	Homeostatic_Oligos
TMEM143	0.315959	1.91635e-07	4.6681e-07	5.20727	Homeostatic_Oligos
PDIA5	0.628691	1.98849e-07	4.84125e-07	5.20041	Homeostatic_Oligos
TAOK1	0.0279496	2.05443e-07	4.99916e-07	5.19434	Homeostatic_Oligos
C2orf42	0.25959	2.15793e-07	5.24636e-07	5.18519	Homeostatic_Oligos
PRPF38B	0.134372	2.26592e-07	5.50598e-07	5.17608	Homeostatic_Oligos
GDPD5	0.673083	2.36794e-07	5.75084e-07	5.16786	Homeostatic_Oligos
ESCO1	0.143335	2.4373e-07	5.91614e-07	5.16246	Homeostatic_Oligos
R3HCC1L	0.111329	2.46716e-07	5.98757e-07	5.16018	Homeostatic_Oligos
GLCCI1	0.125448	2.57012e-07	6.23195e-07	5.15252	Homeostatic_Oligos
CDK11B	0.254412	2.66094e-07	6.45103e-07	5.146	Homeostatic_Oligos
HACE1	0.0945091	2.76904e-07	6.70954e-07	5.13852	Homeostatic_Oligos
FUT8	0.00488922	2.79135e-07	6.7624e-07	5.13702	Homeostatic_Oligos
EBF1	1.21079	2.92956e-07	7.091e-07	5.12792	Homeostatic_Oligos
USP49	0.209738	3.00859e-07	7.27843e-07	5.12291	Homeostatic_Oligos
CHODL	0.189885	3.05584e-07	7.39146e-07	5.11997	Homeostatic_Oligos
BACH1	0.158048	3.28745e-07	7.94326e-07	5.10618	Homeostatic_Oligos
PACRGL	0.114162	3.50652e-07	8.46664e-07	5.09397	Homeostatic_Oligos
USP36	0.174043	3.585e-07	8.65461e-07	5.08977	Homeostatic_Oligos
KCNE1	0.778615	3.63792e-07	8.78084e-07	5.08699	Homeostatic_Oligos
XRCC4	0.111142	3.68588e-07	8.89348e-07	5.0845	Homeostatic_Oligos
SPSB1	0.171812	3.68994e-07	8.9017e-07	5.0843	Homeostatic_Oligos
FBXW7	0.0973584	3.73225e-07	9.0022e-07	5.08213	Homeostatic_Oligos
CNTNAP3B	0.868009	3.75135e-07	9.04667e-07	5.08116	Homeostatic_Oligos
FLRT2	0.449943	3.98063e-07	9.59455e-07	5.06988	Homeostatic_Oligos
PRDM6	0.468219	4.00843e-07	9.65986e-07	5.06856	Homeostatic_Oligos
CSRNP3	0.114505	4.03139e-07	9.71178e-07	5.06747	Homeostatic_Oligos
NUAK1	0.0966252	4.07299e-07	9.80856e-07	5.06551	Homeostatic_Oligos
TNR	0.499731	4.38603e-07	1.05495e-06	5.05139	Homeostatic_Oligos
MTUS2	0.379291	4.43159e-07	1.06554e-06	5.04942	Homeostatic_Oligos
FLVCR1	0.176618	4.47681e-07	1.07603e-06	5.04748	Homeostatic_Oligos
SPOCD1	0.860665	4.50354e-07	1.08227e-06	5.04634	Homeostatic_Oligos
SEMA3A	0.448096	4.51684e-07	1.08527e-06	5.04578	Homeostatic_Oligos
POM121C	0.133191	4.61529e-07	1.10854e-06	5.04165	Homeostatic_Oligos
DGKG	0.256924	4.78551e-07	1.14862e-06	5.03472	Homeostatic_Oligos
POLR3G	0.127344	4.84216e-07	1.16181e-06	5.03246	Homeostatic_Oligos
AK9	0.144261	4.93722e-07	1.18442e-06	5.02874	Homeostatic_Oligos
SIK2	0.0480889	4.98784e-07	1.19635e-06	5.02678	Homeostatic_Oligos
SRSF4	0.097072	4.99364e-07	1.19753e-06	5.02656	Homeostatic_Oligos
TAF2	0.111063	5.61779e-07	1.3451e-06	5.00391	Homeostatic_Oligos
ZNF891	0.166093	5.62435e-07	1.34644e-06	5.00369	Homeostatic_Oligos
UVSSA	0.173414	5.6955e-07	1.36323e-06	5.00127	Homeostatic_Oligos
CDK8	0.092914	5.91326e-07	1.41511e-06	4.99403	Homeostatic_Oligos
SCFD1	0.0767159	5.94264e-07	1.42139e-06	4.99307	Homeostatic_Oligos
DHX57	0.215738	6.04283e-07	1.44511e-06	4.98984	Homeostatic_Oligos
CRYL1	0.0578125	6.11717e-07	1.46238e-06	4.98748	Homeostatic_Oligos
CHST8	0.527374	6.13453e-07	1.46627e-06	4.98693	Homeostatic_Oligos
CROCC	0.192166	6.15439e-07	1.47051e-06	4.98631	Homeostatic_Oligos
DAAM1	0.183536	6.83816e-07	1.63162e-06	4.9659	Homeostatic_Oligos
KCNQ3	0.232696	6.84754e-07	1.63357e-06	4.96564	Homeostatic_Oligos
BICC1	0.617693	6.97147e-07	1.66285e-06	4.96216	Homeostatic_Oligos
CCDC138	0.129618	7.24841e-07	1.7286e-06	4.95459	Homeostatic_Oligos
SCN2A	0.283625	7.78839e-07	1.85512e-06	4.9406	Homeostatic_Oligos
FGF12	0.166602	7.79308e-07	1.85592e-06	4.94048	Homeostatic_Oligos
DZIP1	0.461342	7.88086e-07	1.8765e-06	4.93829	Homeostatic_Oligos
TMEM178A	0.142454	7.90478e-07	1.88187e-06	4.9377	Homeostatic_Oligos
KLHL18	0.214471	7.95714e-07	1.89401e-06	4.93642	Homeostatic_Oligos
MKRN3	0.0693365	8.0835e-07	1.92308e-06	4.93334	Homeostatic_Oligos
PEX14	0.156368	8.1741e-07	1.94363e-06	4.93116	Homeostatic_Oligos
ANKRD30BL	0.33718	8.73836e-07	2.07636e-06	4.91811	Homeostatic_Oligos
PDE8A	0.033784	8.81991e-07	2.09465e-06	4.91629	Homeostatic_Oligos
MAN2B1	0.260934	8.87949e-07	2.10807e-06	4.91497	Homeostatic_Oligos
ATP11B	0.0508926	9.01122e-07	2.13898e-06	4.91209	Homeostatic_Oligos
TNPO3	0.114184	9.08532e-07	2.15582e-06	4.91048	Homeostatic_Oligos
DPY19L2	0.50608	9.2878e-07	2.20273e-06	4.90616	Homeostatic_Oligos
SNX32	0.295179	9.40299e-07	2.22966e-06	4.90374	Homeostatic_Oligos
KIAA1217	0.401885	9.47879e-07	2.24686e-06	4.90216	Homeostatic_Oligos
ADAP2	0.405085	9.73221e-07	2.30574e-06	4.89698	Homeostatic_Oligos
PDK1	0.290658	9.94256e-07	2.35476e-06	4.89277	Homeostatic_Oligos
GDPD1	0.170403	1.00377e-06	2.37648e-06	4.8909	Homeostatic_Oligos
DNMBP	0.575887	1.02792e-06	2.4328e-06	4.88622	Homeostatic_Oligos
SUCLG2	0.109708	1.04169e-06	2.46413e-06	4.88359	Homeostatic_Oligos
UBP1	0.155485	1.05911e-06	2.50492e-06	4.88032	Homeostatic_Oligos
KMT2A	0.0550709	1.10898e-06	2.62106e-06	4.87124	Homeostatic_Oligos
ZNF814	0.155317	1.11808e-06	2.6421e-06	4.86963	Homeostatic_Oligos
ZNF69	0.45648	1.13618e-06	2.68303e-06	4.86645	Homeostatic_Oligos
ATG5	0.11689	1.13862e-06	2.68833e-06	4.86603	Homeostatic_Oligos
ZNF804A	0.74318	1.28085e-06	3.01896e-06	4.8427	Homeostatic_Oligos
MORC3	0.107781	1.30991e-06	3.08692e-06	4.83824	Homeostatic_Oligos
ZDHHC21	0.0503497	1.3135e-06	3.09486e-06	4.8377	Homeostatic_Oligos
CCDC62	0.341021	1.33375e-06	3.14202e-06	4.83466	Homeostatic_Oligos
MTO1	0.184107	1.33862e-06	3.15295e-06	4.83393	Homeostatic_Oligos
ZFP64	0.193474	1.37375e-06	3.23404e-06	4.82878	Homeostatic_Oligos
RAB3GAP1	0.0560848	1.46621e-06	3.44934e-06	4.81579	Homeostatic_Oligos
ATP10D	0.190343	1.46789e-06	3.45271e-06	4.81556	Homeostatic_Oligos
CCNYL1	0.146556	1.48756e-06	3.49779e-06	4.8129	Homeostatic_Oligos
SRGN	0.688392	1.55334e-06	3.65121e-06	4.80425	Homeostatic_Oligos
ARHGEF12	0.111079	1.5566e-06	3.65769e-06	4.80383	Homeostatic_Oligos
PAN2	0.166439	1.59298e-06	3.74118e-06	4.7992	Homeostatic_Oligos
CUL9	0.246419	1.66099e-06	3.89957e-06	4.79082	Homeostatic_Oligos
RANBP10	0.217948	1.66258e-06	3.90264e-06	4.79063	Homeostatic_Oligos
PIAS2	0.0744278	1.69697e-06	3.982e-06	4.78652	Homeostatic_Oligos
STX18	0.0967808	1.89168e-06	4.43661e-06	4.76467	Homeostatic_Oligos
VASH1	0.207044	1.96544e-06	4.60725e-06	4.75695	Homeostatic_Oligos
KCNQ5	0.254463	1.99415e-06	4.67217e-06	4.75402	Homeostatic_Oligos
ALK	0.25629	2.04439e-06	4.78743e-06	4.74899	Homeostatic_Oligos
NCAM1	0.00527638	2.09494e-06	4.9033e-06	4.74404	Homeostatic_Oligos
RNF168	0.169477	2.18747e-06	5.11551e-06	4.73529	Homeostatic_Oligos
CDHR3	0.488802	2.51248e-06	5.86657e-06	4.70711	Homeostatic_Oligos
GLMN	0.152907	2.51633e-06	5.87458e-06	4.7068	Homeostatic_Oligos
SLC4A4	0.47937	2.52935e-06	5.90396e-06	4.70575	Homeostatic_Oligos
PLCH1	0.517465	2.5309e-06	5.90657e-06	4.70562	Homeostatic_Oligos
IGFBP7	0.763998	2.57875e-06	6.01314e-06	4.7018	Homeostatic_Oligos
PPP1R42	0.522007	2.70024e-06	6.29005e-06	4.6924	Homeostatic_Oligos
NEK11	0.151749	2.70294e-06	6.29525e-06	4.69219	Homeostatic_Oligos
LARP4	0.115525	2.706e-06	6.30131e-06	4.69196	Homeostatic_Oligos
STARD13	0.0384821	2.76805e-06	6.44145e-06	4.68732	Homeostatic_Oligos
ZNF549	0.229831	2.878e-06	6.69503e-06	4.67934	Homeostatic_Oligos
ARHGEF28	0.251652	2.98009e-06	6.92785e-06	4.67219	Homeostatic_Oligos
EPHA6	0.413087	3.06654e-06	7.1252e-06	4.66631	Homeostatic_Oligos
DCAF5	0.110944	3.20836e-06	7.44592e-06	4.65701	Homeostatic_Oligos
GOLPH3L	0.296343	3.34811e-06	7.76237e-06	4.64822	Homeostatic_Oligos
LPCAT3	0.178167	3.40957e-06	7.90219e-06	4.64447	Homeostatic_Oligos
RNF215	0.276613	3.57433e-06	8.27567e-06	4.63471	Homeostatic_Oligos
LCLAT1	0.169287	3.63597e-06	8.41697e-06	4.63118	Homeostatic_Oligos
PAPPA2	0.190768	3.66999e-06	8.49144e-06	4.62925	Homeostatic_Oligos
OSBPL6	0.464437	3.69224e-06	8.53862e-06	4.62799	Homeostatic_Oligos
ZFYVE1	0.173672	3.69505e-06	8.54369e-06	4.62784	Homeostatic_Oligos
SCAF11	0.0469383	3.73412e-06	8.6311e-06	4.62566	Homeostatic_Oligos
ETV5	0.198901	3.75e-06	8.66635e-06	4.62478	Homeostatic_Oligos
CLHC1	0.16815	3.79559e-06	8.77023e-06	4.62227	Homeostatic_Oligos
RPRD1A	0.0628295	3.84205e-06	8.87282e-06	4.61975	Homeostatic_Oligos
SCN3A	0.462017	3.84256e-06	8.87282e-06	4.61972	Homeostatic_Oligos
FUBP1	0.0704643	3.8878e-06	8.97426e-06	4.61729	Homeostatic_Oligos
PPP2R2B	0.0770398	4.12671e-06	9.51933e-06	4.6049	Homeostatic_Oligos
CBR4	0.0601838	4.13421e-06	9.53504e-06	4.60452	Homeostatic_Oligos
PRICKLE2	0.233704	4.31839e-06	9.95315e-06	4.59544	Homeostatic_Oligos
ZNF717	0.109155	4.35113e-06	1.00269e-05	4.59386	Homeostatic_Oligos
NUP43	0.184159	4.609e-06	1.06105e-05	4.58184	Homeostatic_Oligos
PC	0.192981	4.62339e-06	1.06401e-05	4.58119	Homeostatic_Oligos
ZFAND4	0.136571	4.8544e-06	1.11605e-05	4.57098	Homeostatic_Oligos
POLN	0.622618	4.99402e-06	1.14719e-05	4.56504	Homeostatic_Oligos
PDE4B	0.0827134	5.07967e-06	1.16647e-05	4.56147	Homeostatic_Oligos
EPHB1	0.303921	5.21646e-06	1.19769e-05	4.55589	Homeostatic_Oligos
RGPD8	0.353665	5.3874e-06	1.2359e-05	4.54911	Homeostatic_Oligos
NTNG1	0.787331	5.5419e-06	1.26986e-05	4.54315	Homeostatic_Oligos
KIAA0232	0.0351484	5.74253e-06	1.31474e-05	4.53565	Homeostatic_Oligos
KCNS3	0.331241	5.87267e-06	1.34386e-05	4.53092	Homeostatic_Oligos
ZNRF3	0.258012	5.95375e-06	1.36196e-05	4.52803	Homeostatic_Oligos
SLC35D1	0.129387	6.01567e-06	1.3759e-05	4.52584	Homeostatic_Oligos
GIPC1	0.100883	6.04706e-06	1.38285e-05	4.52474	Homeostatic_Oligos
TP53BP1	0.116093	6.35203e-06	1.45138e-05	4.51432	Homeostatic_Oligos
TTBK1	0.20445	6.47246e-06	1.47865e-05	4.51034	Homeostatic_Oligos
KNTC1	0.381895	6.59015e-06	1.50529e-05	4.50651	Homeostatic_Oligos
STXBP4	0.137002	6.77683e-06	1.54716e-05	4.50058	Homeostatic_Oligos
MBNL1	0.0134592	6.78743e-06	1.54932e-05	4.50025	Homeostatic_Oligos
MGRN1	0.111147	7.26033e-06	1.65616e-05	4.48591	Homeostatic_Oligos
KLHL3	0.070548	7.2977e-06	1.66441e-05	4.48482	Homeostatic_Oligos
DNA2	0.249942	7.41524e-06	1.69066e-05	4.48141	Homeostatic_Oligos
ME3	0.425231	7.47698e-06	1.70417e-05	4.47964	Homeostatic_Oligos
HSCB	0.236486	7.53311e-06	1.7164e-05	4.47804	Homeostatic_Oligos
NOP58	0.153435	7.54953e-06	1.71957e-05	4.47758	Homeostatic_Oligos
RALGPS2	0.571297	7.85771e-06	1.78917e-05	4.46902	Homeostatic_Oligos
MOB1B	0.289573	8.08093e-06	1.83908e-05	4.46303	Homeostatic_Oligos
ZNF135	0.119082	8.14898e-06	1.85334e-05	4.46123	Homeostatic_Oligos
NPFFR1	0.637823	8.25804e-06	1.87752e-05	4.45838	Homeostatic_Oligos
USP42	0.167709	8.30385e-06	1.88731e-05	4.4572	Homeostatic_Oligos
ZNF680	0.0919645	9.12693e-06	2.07267e-05	4.43689	Homeostatic_Oligos
PCBD2	0.199899	9.17337e-06	2.08287e-05	4.43579	Homeostatic_Oligos
ATAD3B	0.270783	9.23623e-06	2.09645e-05	4.43432	Homeostatic_Oligos
FAF2	0.125894	9.56433e-06	2.16949e-05	4.4268	Homeostatic_Oligos
BTBD10	0.11405	9.68178e-06	2.19577e-05	4.42416	Homeostatic_Oligos
MAN2C1	0.188273	9.98612e-06	2.26442e-05	4.41747	Homeostatic_Oligos
SMC6	0.0959081	1.02169e-05	2.31599e-05	4.41253	Homeostatic_Oligos
FADS2	0.172422	1.03644e-05	2.34827e-05	4.40943	Homeostatic_Oligos
CSGALNACT1	0.640583	1.06798e-05	2.41892e-05	4.40293	Homeostatic_Oligos
TRIM66	0.168613	1.07684e-05	2.43818e-05	4.40114	Homeostatic_Oligos
CTNND1	0.129405	1.10515e-05	2.50063e-05	4.39551	Homeostatic_Oligos
SP140L	0.734339	1.1066e-05	2.50351e-05	4.39522	Homeostatic_Oligos
EPS15	0.00802635	1.12875e-05	2.55153e-05	4.39091	Homeostatic_Oligos
CREBBP	0.0683407	1.13983e-05	2.57572e-05	4.38879	Homeostatic_Oligos
RABL2B	0.221036	1.1404e-05	2.57658e-05	4.38868	Homeostatic_Oligos
L2HGDH	0.192167	1.17132e-05	2.64515e-05	4.38286	Homeostatic_Oligos
FLYWCH1	0.18175	1.17199e-05	2.64621e-05	4.38274	Homeostatic_Oligos
ZNF678	0.109307	1.19143e-05	2.68836e-05	4.37915	Homeostatic_Oligos
DISC1	0.113502	1.27373e-05	2.87074e-05	4.36457	Homeostatic_Oligos
DGKB	0.285118	1.29224e-05	2.91199e-05	4.36141	Homeostatic_Oligos
GLYATL2	0.502942	1.30678e-05	2.94427e-05	4.35897	Homeostatic_Oligos
RAB1A	0.0673914	1.30934e-05	2.94956e-05	4.35854	Homeostatic_Oligos
RAB28	0.0910768	1.31933e-05	2.97158e-05	4.35687	Homeostatic_Oligos
METTL2B	0.197391	1.3491e-05	3.03762e-05	4.35199	Homeostatic_Oligos
PPP3CB	0.0961926	1.52097e-05	3.41957e-05	4.32563	Homeostatic_Oligos
NR6A1	0.108781	1.56085e-05	3.50866e-05	4.31992	Homeostatic_Oligos
RAB31	0.269801	1.57283e-05	3.53385e-05	4.31823	Homeostatic_Oligos
UNC80	0.42301	1.57709e-05	3.54227e-05	4.31764	Homeostatic_Oligos
SPEF2	0.263781	1.69996e-05	3.81326e-05	4.30104	Homeostatic_Oligos
RC3H1	0.057831	1.71098e-05	3.83735e-05	4.29961	Homeostatic_Oligos
SIN3A	0.158494	1.72098e-05	3.85852e-05	4.29832	Homeostatic_Oligos
EPB41L4B	0.412789	1.82206e-05	4.08116e-05	4.28565	Homeostatic_Oligos
LAMC3	0.737035	1.91301e-05	4.28278e-05	4.27481	Homeostatic_Oligos
PRMT7	0.153228	1.92134e-05	4.30003e-05	4.27384	Homeostatic_Oligos
DPYSL4	0.25289	1.9734e-05	4.41438e-05	4.26788	Homeostatic_Oligos
NBPF9	0.491805	2.04398e-05	4.57002e-05	4.26003	Homeostatic_Oligos
ATRNL1	0.154392	2.06259e-05	4.60864e-05	4.25801	Homeostatic_Oligos
PDE10A	0.140337	2.13152e-05	4.75957e-05	4.25065	Homeostatic_Oligos
UBN2	0.0776172	2.16662e-05	4.83636e-05	4.24699	Homeostatic_Oligos
FRRS1L	0.211645	2.22711e-05	4.96818e-05	4.24081	Homeostatic_Oligos
CAMK2G	0.208339	2.52724e-05	5.62765e-05	4.21235	Homeostatic_Oligos
WDR25	0.182997	2.53077e-05	5.63368e-05	4.21204	Homeostatic_Oligos
TMEM39B	0.237208	2.54403e-05	5.66137e-05	4.21086	Homeostatic_Oligos
LYN	0.918669	2.55978e-05	5.69457e-05	4.20946	Homeostatic_Oligos
CCDC3	0.204418	2.56828e-05	5.71256e-05	4.20871	Homeostatic_Oligos
NGLY1	0.106453	2.60619e-05	5.795e-05	4.2054	Homeostatic_Oligos
FGF1	0.0631382	2.64954e-05	5.89044e-05	4.20167	Homeostatic_Oligos
OR2L5	0.32321	2.66748e-05	5.92841e-05	4.20014	Homeostatic_Oligos
HDAC1	0.192809	2.73039e-05	6.0643e-05	4.19486	Homeostatic_Oligos
GMEB1	0.248759	2.75106e-05	6.10824e-05	4.19315	Homeostatic_Oligos
ACOT11	0.411547	2.89415e-05	6.42387e-05	4.18164	Homeostatic_Oligos
HOOK2	0.204305	2.96717e-05	6.58274e-05	4.17597	Homeostatic_Oligos
POLR3B	0.177003	3.03116e-05	6.72254e-05	4.17111	Homeostatic_Oligos
VCAN	0.504156	3.08011e-05	6.8278e-05	4.16746	Homeostatic_Oligos
CPB1	0.158684	3.11581e-05	6.90248e-05	4.16483	Homeostatic_Oligos
SLC20A2	0.0393566	3.18135e-05	7.04541e-05	4.16008	Homeostatic_Oligos
CSMD3	0.0748897	3.23274e-05	7.1569e-05	4.15642	Homeostatic_Oligos
ZFR2	0.49838	3.24115e-05	7.17437e-05	4.15583	Homeostatic_Oligos
BMP8A	0.272766	3.2843e-05	7.26636e-05	4.1528	Homeostatic_Oligos
ING5	0.128173	3.32525e-05	7.35579e-05	4.14997	Homeostatic_Oligos
PIGB	0.217296	3.35808e-05	7.42721e-05	4.14772	Homeostatic_Oligos
MGP	1.11514	3.54155e-05	7.82293e-05	4.13552	Homeostatic_Oligos
IFT74	0.15072	3.61588e-05	7.98199e-05	4.13075	Homeostatic_Oligos
ARHGEF1	0.142311	3.70593e-05	8.17685e-05	4.12509	Homeostatic_Oligos
CHST12	0.207117	3.86463e-05	8.52425e-05	4.11543	Homeostatic_Oligos
DPY19L3	0.158106	3.96904e-05	8.75174e-05	4.10927	Homeostatic_Oligos
CARS2	0.130867	4.09939e-05	9.03192e-05	4.10181	Homeostatic_Oligos
BMPR1B	0.734541	4.16557e-05	9.1748e-05	4.0981	Homeostatic_Oligos
AKAP12	0.418122	4.16787e-05	9.1784e-05	4.09797	Homeostatic_Oligos
GOLGA1	0.109998	4.50811e-05	9.91336e-05	4.07977	Homeostatic_Oligos
ANKRD23	0.112128	4.56746e-05	0.000100407	4.07672	Homeostatic_Oligos
MKNK1	0.322872	4.65347e-05	0.000102265	4.07238	Homeostatic_Oligos
CYTH1	0.0173585	4.6809e-05	0.000102835	4.07101	Homeostatic_Oligos
SLC14A1	0.644577	4.98386e-05	0.000109333	4.05638	Homeostatic_Oligos
CACUL1	0.0950514	5.04177e-05	0.000110568	4.05368	Homeostatic_Oligos
FDPS	0.146441	5.0601e-05	0.000110935	4.05283	Homeostatic_Oligos
NHSL1	0.615719	5.06529e-05	0.000111031	4.05259	Homeostatic_Oligos
MSR1	0.546505	5.18218e-05	0.000113539	4.04725	Homeostatic_Oligos
ECHDC2	0.426396	5.27028e-05	0.00011545	4.04331	Homeostatic_Oligos
PRKAA2	0.20738	5.37273e-05	0.000117582	4.03879	Homeostatic_Oligos
INPP5A	0.116358	5.38231e-05	0.000117773	4.03837	Homeostatic_Oligos
DIAPH1	0.298731	5.45759e-05	0.000119383	4.03511	Homeostatic_Oligos
SEC24D	0.488964	5.72587e-05	0.000125152	4.02383	Homeostatic_Oligos
SDK2	0.337784	5.80822e-05	0.000126891	4.02047	Homeostatic_Oligos
CACHD1	0.872512	6.04896e-05	0.000132045	4.01089	Homeostatic_Oligos
KCTD9	0.215139	6.15788e-05	0.000134359	4.00668	Homeostatic_Oligos
SPATA6L	0.273338	6.16206e-05	0.000134408	4.00652	Homeostatic_Oligos
AASS	0.0443306	6.23027e-05	0.000135874	4.00391	Homeostatic_Oligos
ATP8A1	0.00133962	6.51716e-05	0.000141973	3.99326	Homeostatic_Oligos
METTL6	0.156514	6.54132e-05	0.000142454	3.99238	Homeostatic_Oligos
CHL1	0.30603	6.56786e-05	0.000142987	3.99142	Homeostatic_Oligos
LOXL2	0.282422	6.67087e-05	0.000145183	3.98773	Homeostatic_Oligos
THOC1	0.0744175	6.67419e-05	0.000145233	3.98761	Homeostatic_Oligos
CDK11A	0.229832	6.71135e-05	0.000145972	3.98629	Homeostatic_Oligos
TNPO1	0.0620971	6.90928e-05	0.000150134	3.97939	Homeostatic_Oligos
[truncated: 25,493 more rows]

## Sheet: MC_Oligos_C9ALS_Control
baseMean	log2FoldChange	lfcSE	stat	pvalue	padj	gene
369.114	0.328167	0.052693	6.2279	4.72722e-10	1.27398e-06	AP2B1
585.97	1.97589	0.331612	5.95842	2.54688e-09	3.43192e-06	PLCG2
492.245	0.257637	0.0476303	5.40911	6.33388e-08	5.68993e-05	VPS41
509.598	0.583134	0.111771	5.21722	1.81629e-07	0.000122373	PTP4A2
357.587	1.99294	0.401722	4.96099	7.01331e-07	0.000378017	FMN1
418.656	0.314832	0.0649406	4.848	1.24713e-06	0.00056017	FAM133B
247.843	0.253485	0.0591338	4.28663	1.81404e-05	0.00488884	CDC40
228.319	0.656824	0.158274	4.14991	3.32603e-05	0.00805066	FAM221A
535.476	0.974747	0.23586	4.13274	3.58471e-05	0.00805066	SNAP25
432.062	0.845751	0.20762	4.07355	4.63024e-05	0.00891321	CSMD1
484.892	1.03232	0.255253	4.04429	5.24814e-05	0.00942916	SPARCL1
234.948	0.243207	0.0610865	3.98136	6.85221e-05	0.0115417	KPNA6
704.591	0.299234	0.0784732	3.8132	0.00013718	0.0176048	SPECC1
492.264	0.175972	0.0468336	3.75738	0.0001717	0.0210332	NCKAP1
223.415	0.162587	0.0458901	3.54296	0.000395656	0.0392352	ATG5
621.783	1.20525	0.343175	3.51206	0.00044465	0.0392352	CLU
415.107	0.246725	0.0703299	3.5081	0.000451314	0.0392352	ZNF827
327.75	0.261176	0.0753223	3.46744	0.000525435	0.0418857	RSRC2
243.079	0.508108	0.146889	3.45913	0.000541931	0.0418857	SLC25A29
331.45	0.69507	0.201672	3.44654	0.000567806	0.0418857	CHN1
207.221	0.302799	0.0885247	3.42051	0.000625042	0.0421221	WDSUB1
656.678	0.186665	0.0546329	3.41671	0.00063383	0.0421221	CEP85L
488.936	0.175809	0.0515999	3.40715	0.000656448	0.0421221	ADAM22
463.101	0.774464	0.231009	3.35253	0.000800777	0.0490476	SYT1
215.205	0.198535	0.0596095	3.33059	0.000866623	0.0505425	FBXO25
424.718	0.305974	0.0929298	3.29252	0.000992922	0.0536682	SACS
600.862	0.253529	0.0791442	3.20338	0.00135823	0.0653647	MFAP3L
1796.38	0.257957	0.080824	3.19159	0.00141491	0.0668979	SGIP1
530.363	0.174419	0.0547654	3.18484	0.00144833	0.0672975	DCUN1D4
795.621	0.148831	0.0468729	3.17521	0.0014973	0.0683935	SPIN1
599.324	0.308589	0.0975505	3.16338	0.0015595	0.0697242	GATAD1
445.964	0.451811	0.144286	3.13136	0.00173998	0.0734338	SMOC1
238.41	0.210159	0.0671285	3.1307	0.00174388	0.0734338	DMXL2
434.41	0.137326	0.0439563	3.12414	0.00178323	0.0739355	SNX13
554.978	0.15721	0.0505163	3.11207	0.00185783	0.0758613	UBE2K
2183.71	0.252731	0.0817764	3.09051	0.00199813	0.0795425	ST6GALNAC3
453.341	0.185801	0.0602301	3.08485	0.00203652	0.0795425	FUBP1
248.066	0.422653	0.137382	3.07647	0.00209467	0.0806448	NRBP2
219.991	0.344518	0.112391	3.06537	0.00217403	0.0819199	MYEF2
550.543	0.225616	0.0741409	3.04307	0.00234176	0.0860327	GLS
572.644	0.177054	0.0582329	3.04044	0.00236231	0.0860327	TTBK2
269.96	0.185996	0.0625127	2.97533	0.00292671	0.102435	ORC4
1338.09	0.251785	0.0850065	2.96195	0.00305702	0.104287	PPP1R9A
308.504	0.213313	0.0723038	2.95023	0.00317533	0.106969	HACE1
217.643	0.159984	0.054338	2.94425	0.00323741	0.107242	CTNNBL1
311.435	0.165407	0.0565532	2.9248	0.00344675	0.110718	UPF2
801.192	0.106807	0.0366167	2.91691	0.00353522	0.110718	NBAS
500.698	0.266919	0.0915575	2.91532	0.00355327	0.110718	C21orf91
307.225	0.244282	0.0845525	2.88911	0.0038633	0.115837	SLC16A7
597.847	0.831141	0.287918	2.88673	0.00389265	0.115837	GNAS
560.446	0.228147	0.0793494	2.87522	0.0040374	0.115837	ZNF483
433.755	0.334699	0.116417	2.875	0.00404033	0.115837	PTPRE
407.991	0.247861	0.086248	2.87381	0.00405552	0.115837	EPB41L1
1139.75	0.251106	0.0876602	2.86454	0.00417616	0.116028	TBC1D12
267.423	0.15295	0.0538457	2.84052	0.00450399	0.122609	PRPF39
245.059	0.132438	0.0467658	2.83194	0.00462663	0.124688	CMTM4
362.488	0.130614	0.0466104	2.80225	0.00507477	0.131505	PPHLN1
304.143	0.495789	0.177638	2.79101	0.00525445	0.134864	CSRNP3
632.341	0.288427	0.103923	2.77539	0.0055135	0.138868	PDZD2
1470.58	0.134845	0.0487772	2.7645	0.00570094	0.140954	CLASP1
345.762	0.13602	0.0493221	2.75778	0.00581954	0.142579	EYA3
333.987	0.223048	0.0812912	2.74382	0.00607287	0.144801	NME7
397.313	0.233792	0.085485	2.73489	0.00624014	0.144801	SLC35E3
926.994	0.156587	0.0573393	2.73088	0.00631663	0.144801	UBE2D3
1177.3	0.204242	0.0752043	2.71582	0.00661111	0.149722	MPDZ
791.964	0.328552	0.122368	2.68495	0.00725404	0.160891	PHACTR1
409.765	0.135766	0.0506384	2.68109	0.00733821	0.160891	AFF1
1547.69	0.140999	0.0526084	2.68016	0.00735874	0.160891	VPS13C
415.19	0.171472	0.0640259	2.67816	0.00740277	0.160891	PSIP1
268.464	0.222912	0.0833454	2.67456	0.00748284	0.16133	TRIQK
242.929	0.144817	0.0542214	2.67085	0.00756593	0.161827	KPNA5
295.988	0.118188	0.0446235	2.64857	0.00808327	0.167572	ACTR3
1264.52	0.256377	0.0973757	2.63287	0.00846669	0.171311	HNRNPDL
308.058	0.13906	0.0529033	2.62858	0.00857428	0.171311	STAM
416.194	0.149897	0.0571299	2.6238	0.00869558	0.171311	FBXL4
438.736	0.156985	0.0598326	2.62374	0.00869699	0.171311	YTHDC2
283.929	0.144972	0.0553261	2.62031	0.00878491	0.171311	HLTF
1186.86	0.344634	0.131673	2.61735	0.00886167	0.171311	DTNA
283.54	0.269525	0.103033	2.6159	0.00889927	0.171311	ZNF680
257.287	0.157506	0.0604975	2.60352	0.00922714	0.173896	LARP1B
887.981	0.183336	0.0705111	2.60011	0.0093195	0.174417	DYNC1I1
267.509	0.282114	0.108949	2.58942	0.00961383	0.177461	CMIP
286.439	0.491205	0.19024	2.58203	0.00982207	0.179211	APOLD1
306.398	0.184966	0.071655	2.58134	0.00984164	0.179211	EIF5B
676.341	0.149404	0.0579608	2.57767	0.00994692	0.179626	SYT9
309.677	0.175783	0.0683021	2.57361	0.0100644	0.179626	TXNL1
666.642	0.115122	0.0448487	2.56691	0.0102611	0.181931	STRN3
246.393	0.194669	0.0761204	2.55739	0.0105462	0.185765	ARSB
245.94	0.196126	0.0770701	2.54477	0.0109351	0.190129	SNX2
376.849	0.119466	0.0469909	2.54233	0.0110117	0.190234	AGPS
251.355	0.588833	0.232031	2.53774	0.011157	0.190398	GRM7
240.7	0.244399	0.0964066	2.53509	0.0112419	0.190398	GAS2
814.827	0.10692	0.0423264	2.52609	0.0115339	0.190398	PHC3
847.98	0.0958274	0.037937	2.52596	0.0115381	0.190398	GIGYF2
1049.44	0.107399	0.0425665	2.52307	0.0116334	0.190398	MYCBP2
467.492	0.12144	0.0481623	2.52148	0.0116863	0.190398	KIF16B
1752.34	0.266776	0.106786	2.49823	0.0124815	0.197869	MGAT5
249.59	0.206008	0.0827445	2.48969	0.0127856	0.198706	METAP2
366.587	0.148803	0.0597698	2.4896	0.0127886	0.198706	GCA
1263.82	0.600772	0.241422	2.48847	0.0128292	0.198706	RBFOX1
926.604	0.193797	0.078324	2.4743	0.0133498	0.204367	CCDC91
304.261	0.173307	0.0701129	2.47183	0.0134422	0.204367	PSMD14
273.953	0.16747	0.0677921	2.47035	0.013498	0.204367	DEK
454.715	0.121491	0.0493474	2.46196	0.0138182	0.207687	UBE2E1
598.54	0.127917	0.0521217	2.45419	0.0141201	0.207687	SENP7
444.375	0.0997902	0.0406862	2.45268	0.0141797	0.207687	OSBPL8
235.738	0.14288	0.0583345	2.44932	0.0143125	0.208499	SCAI
709.515	0.112755	0.0462775	2.43649	0.0148305	0.212597	PSPC1
214.473	0.169896	0.0698493	2.43232	0.0150025	0.212799	PARP4
669.793	0.105594	0.0436053	2.42158	0.0154533	0.216216	USP48
1133.41	0.135857	0.0561912	2.41777	0.0156161	0.216936	CPEB4
687.844	0.251551	0.104461	2.40808	0.0160367	0.221635	MSI2
325.573	0.186444	0.0774953	2.40587	0.016134	0.221842	SYTL2
927.606	0.151152	0.0629532	2.40102	0.0163494	0.222606	FER
1334.97	0.207285	0.0863363	2.4009	0.0163548	0.222606	SH3TC2
1271.83	0.153345	0.0643023	2.38476	0.0170903	0.226889	ZNF280D
287.826	0.147879	0.0620912	2.38163	0.017236	0.227657	NSUN6
509.733	0.225155	0.0946779	2.37811	0.0174016	0.227657	YWHAZ
447.719	0.124973	0.0527851	2.36759	0.0179044	0.228617	TNPO1
352.011	0.131797	0.055754	2.36391	0.0180832	0.228617	MDM2
275.061	0.181216	0.0767097	2.36236	0.0181589	0.228617	MANBA
1125.04	0.187447	0.0794832	2.35832	0.018358	0.228617	MAPK10
210.089	0.299395	0.127059	2.35635	0.0184556	0.228617	FLNB
356.159	0.0936386	0.0400645	2.3372	0.019429	0.238005	NUDCD3
1012.45	0.160495	0.0687973	2.33286	0.0196553	0.238608	DNER
377.268	0.142897	0.0613145	2.33056	0.0197764	0.239002	HNRNPH3
529.814	0.110009	0.0473691	2.32238	0.0202124	0.242099	NDUFA10
218.934	0.180332	0.0777562	2.3192	0.0203844	0.243079	TARDBP
776.46	0.101564	0.0439968	2.30845	0.0209743	0.24726	U2SURP
379.355	0.160379	0.0694781	2.30833	0.0209806	0.24726	ERMP1
674.855	0.178716	0.0774954	2.30616	0.0211019	0.24726	PPP4R2
466.194	0.255017	0.110695	2.30378	0.0212351	0.247743	SVIP
236.521	0.312962	0.136034	2.30061	0.0214136	0.247886	FANCC
1434.39	0.18841	0.0819067	2.3003	0.0214313	0.247886	L3MBTL4
747.212	0.344986	0.150742	2.28859	0.0221031	0.251509	PLA2G4C
466.582	0.252667	0.110415	2.28833	0.0221182	0.251509	TRIO
241.889	0.144326	0.0632099	2.28329	0.0224134	0.252737	WASL
827.216	0.270432	0.118721	2.27787	0.0227341	0.254225	RTN1
1192.25	0.148947	0.0656004	2.27051	0.0231764	0.258101	ARHGEF7
564.744	0.0906532	0.0399718	2.26793	0.0233337	0.258783	HMBOX1
711.265	0.159724	0.0704967	2.26569	0.0234703	0.259232	PDS5A
213.832	0.132209	0.0584055	2.26363	0.0235967	0.25955	SEC61A2
220.045	0.241991	0.10705	2.26053	0.0237881	0.25955	SCRN1
426.103	0.13699	0.0608689	2.25058	0.024412	0.263971	CENPC
445.252	0.127452	0.0566606	2.2494	0.0244871	0.263971	TIAL1
320.107	0.254448	0.113229	2.24719	0.0246279	0.264431	CCDC146
678.525	0.145793	0.0650445	2.24144	0.0249978	0.265522	PPA2
401.012	0.164521	0.0735142	2.23795	0.0252242	0.266585	CAST
292.399	0.10566	0.0473131	2.23321	0.0255352	0.268818	CNOT1
501.248	0.120157	0.0541389	2.21942	0.026458	0.273312	PAPSS1
266.819	0.114003	0.0513985	2.21802	0.0265533	0.273312	EPG5
389.563	0.117098	0.0528681	2.21492	0.0267658	0.273312	PIKFYVE
1904.13	0.133694	0.0603921	2.21376	0.0268454	0.273312	PPM1H
329.369	0.13787	0.0622796	2.21372	0.026848	0.273312	RBBP6
460.403	0.40612	0.183491	2.21329	0.0268775	0.273312	EEF1A1
389.655	0.150151	0.0679275	2.21046	0.0270732	0.273312	CYB5R4
1754.81	0.0769002	0.0348766	2.20492	0.0274597	0.275545	RALGAPA1
434.681	0.157432	0.0718169	2.19213	0.02837	0.282174	CAPS2
303.251	0.131481	0.0599801	2.19207	0.0283744	0.282174	UGP2
230.437	0.139086	0.0636363	2.18564	0.0288417	0.28465	OXCT1
339.981	0.114419	0.0523824	2.1843	0.0289403	0.28465	BMPR1A
258.58	0.116101	0.0532253	2.18131	0.0291604	0.285772	UBR4
478.202	0.11655	0.0538008	2.16632	0.0302869	0.293609	RPRD1A
318.586	0.121241	0.0560084	2.16469	0.0304113	0.293758	LMBR1
1595	0.0748842	0.0346904	2.15864	0.0308778	0.295689	SPAG9
366.692	0.195083	0.0903909	2.15821	0.0309113	0.295689	RAD21
232.524	0.106416	0.0493661	2.15565	0.0311112	0.295689	MBD2
224.506	0.165858	0.0769634	2.15503	0.0311598	0.295689	CBX5
571.482	0.118674	0.055576	2.13534	0.0327334	0.306443	DENND5B
562.872	0.133758	0.062961	2.12446	0.0336314	0.31254	RBM5
307.302	0.094515	0.0447799	2.11066	0.0348019	0.319017	PPP4R1
757.093	0.311356	0.147914	2.10498	0.0352932	0.321283	SGCD
281.09	0.109529	0.0520802	2.10308	0.0354589	0.321283	SAFB
391.703	0.10122	0.0481471	2.10231	0.0355259	0.321283	TRAPPC8
200.434	0.160926	0.0769035	2.09256	0.0363881	0.32646	SERGEF
976.426	0.171698	0.08212	2.09082	0.0365442	0.32646	HP1BP3
308.225	0.159726	0.0764096	2.09039	0.0365829	0.32646	LUC7L
621.153	0.169059	0.0810577	2.08567	0.0370088	0.32829	RAB30
574.828	0.160592	0.077106	2.08274	0.0372752	0.32829	CLTC
508.483	0.334303	0.160724	2.07999	0.0375267	0.329428	RPL37A
296.146	0.0949828	0.0457554	2.07588	0.0379048	0.331667	THRAP3
272.563	0.341169	0.16492	2.06869	0.0385749	0.335179	INPP5F
321.777	0.101965	0.0493162	2.06758	0.0386793	0.335179	LATS1
616.469	0.231123	0.112083	2.06207	0.0392012	0.337531	CLK1
222.261	0.214168	0.104185	2.05565	0.0398165	0.339574	GFOD1
1350.5	0.0721415	0.0352383	2.04725	0.0406336	0.344364	TNRC6A
747.611	0.0997162	0.0487674	2.04473	0.0408813	0.344821	MLLT10
253.826	0.217891	0.10662	2.04362	0.0409914	0.344821	PGBD5
895.163	0.0863074	0.0424112	2.03502	0.0418493	0.344821	PHF14
671.908	0.135413	0.0665671	2.03423	0.0419283	0.344821	CAMK2D
494.939	0.0984059	0.0483841	2.03385	0.0419671	0.344821	PCMTD1
350.339	0.0884368	0.0435523	2.03059	0.0422967	0.346473	RAB3GAP2
567.498	0.131825	0.0650003	2.02806	0.0425537	0.347522	PTPRS
478.214	0.185763	0.0916903	2.02598	0.0427666	0.348205	MORF4L1
261.901	0.115845	0.0572618	2.02308	0.0430651	0.349579	FRA10AC1
267.031	0.264791	0.131024	2.02094	0.0432856	0.350314	BEST1
438.082	0.133717	0.0662755	2.0176	0.0436331	0.35207	NR3C2
344.414	0.127604	0.0636033	2.00624	0.0448302	0.357158	RANBP2
495.915	0.104364	0.0520764	2.00406	0.0450636	0.357158	NBEAL1
301.772	0.121917	0.0612794	1.98953	0.0466427	0.359026	ASPH
321.513	0.18585	0.0934438	1.98889	0.0467129	0.359026	CRB1
919.008	0.237338	0.119412	1.98755	0.0468611	0.359026	FUT9
328.255	0.119411	0.0601013	1.98683	0.0469417	0.359026	NFATC3
3959.81	0.297039	0.149632	1.98513	0.0471298	0.359026	LRP1B
213.857	0.126428	0.0637139	1.9843	0.0472221	0.359026	RCL1
670.032	0.121271	0.0611354	1.98364	0.0472959	0.359026	STXBP5
415.678	0.198723	0.100226	1.98274	0.0473964	0.359026	TIAM2
435.601	0.0789461	0.0399267	1.97728	0.0480105	0.35992	SLC30A9
469.361	0.114864	0.0583201	1.96954	0.0488914	0.35992	TOP1
557.049	0.10835	0.0550881	1.96686	0.0491998	0.35992	PHTF2
1622.7	0.209046	0.10642	1.96435	0.049489	0.35992	KCTD8
374.215	0.175242	0.089234	1.96385	0.0495475	0.35992	ARL15
331.23	0.129413	0.065957	1.96208	0.0497528	0.360315	LIMS1
1456.39	0.164387	0.0841244	1.9541	0.0506896	0.362357	GRIA2
435.947	0.0839859	0.043095	1.94886	0.0513127	0.363832	CUL1
683.723	0.0881173	0.045215	1.94885	0.0513133	0.363832	AAK1
299.853	0.125021	0.0642219	1.9467	0.051571	0.363832	EIF3H
620.963	0.0712997	0.0367527	1.93999	0.0523813	0.368584	SCAF8
514.289	0.306988	0.158425	1.93775	0.0526543	0.36954	PARD3B
752.647	0.126975	0.065599	1.93563	0.0529134	0.370393	AIG1
221.385	0.137265	0.0710002	1.9333	0.0531997	0.370473	SWT1
246.277	0.0940113	0.0487484	1.9285	0.0537931	0.37364	UBAP1
1210.79	0.138741	0.0721516	1.92291	0.0544913	0.377517	CHKA
299.448	0.41152	0.216137	1.90398	0.0569131	0.387083	TMEM132C
469.147	0.0875483	0.0459996	1.90324	0.0570093	0.387083	WDR33
596.813	0.135449	0.0711777	1.90297	0.0570446	0.387083	MPHOSPH8
286.649	0.0918011	0.0482643	1.90205	0.0571648	0.387083	RANBP9
333.628	0.109223	0.0574599	1.90086	0.0573206	0.387165	TTC21B
283.013	0.263249	0.139246	1.89053	0.0586871	0.392871	TNS1
327.847	0.319539	0.169117	1.88946	0.0588305	0.392871	CFTR
692.874	0.0758126	0.040128	1.88927	0.0588556	0.392871	RSRC1
263.773	0.0932988	0.049391	1.88898	0.0588942	0.392871	BCL2L13
472.069	0.196011	0.103932	1.88596	0.059301	0.394608	ACSL1
238.658	0.126311	0.0670918	1.88266	0.0597469	0.396484	IGF2R
293.358	0.122649	0.0652313	1.88022	0.0600783	0.396484	ZBTB8OS
382.109	0.0689609	0.0366904	1.87954	0.0601714	0.396484	XPO4
238.824	0.330228	0.176234	1.8738	0.0609573	0.400321	INPP4B
993.697	0.0856689	0.0459421	1.86471	0.0622214	0.403235	ZNF451
385.801	0.12262	0.0658026	1.86345	0.0623994	0.403235	RAB11FIP2
1147.33	0.158848	0.0852905	1.86243	0.0625425	0.403235	TRA2A
1020.67	0.0774147	0.0417737	1.85319	0.0638547	0.409363	DMXL1
398.255	0.0853018	0.0460781	1.85124	0.0641345	0.409363	IRF2
342.88	0.0948499	0.0514052	1.84514	0.0650166	0.412038	COA1
472.221	0.129303	0.0701278	1.84382	0.0652097	0.412038	RNPC3
230.441	0.1059	0.057451	1.84331	0.0652843	0.412038	MTRR
282.523	0.130685	0.070937	1.84226	0.0654368	0.412038	ZNF138
3937.81	0.103967	0.0567792	1.83107	0.0670897	0.419505	PXK
290.481	0.530836	0.290351	1.82825	0.0675117	0.419613	GCNT1
233.091	0.156618	0.0857158	1.82717	0.067674	0.419613	UTP20
510.453	0.146985	0.0804557	1.82691	0.0677134	0.419613	BTBD8
230.751	0.157993	0.086864	1.81886	0.0689328	0.425594	MAPKBP1
524.55	0.104016	0.0577074	1.80247	0.0714711	0.437666	NAP1L1
356.348	0.184	0.10217	1.80093	0.0717138	0.437666	TRPM6
790.624	0.175614	0.0975356	1.80051	0.0717805	0.437666	ASAP1
437.695	0.297526	0.16544	1.79839	0.0721146	0.438711	ACTN2
1566.85	0.0896543	0.0498992	1.79671	0.0723821	0.439346	SPTBN1
282.924	0.0898185	0.0500402	1.79493	0.0726653	0.43965	RYK
206.283	0.110394	0.061795	1.78645	0.074026	0.443387	SLC25A16
369.389	0.0948564	0.0531064	1.78616	0.0740735	0.443387	TCERG1
1047.65	0.0784906	0.0439629	1.78538	0.0741994	0.443387	CDK13
822.469	0.117653	0.0662121	1.77692	0.0755816	0.449652	FANCL
283.406	0.124102	0.0699175	1.77498	0.0759008	0.450556	PPP3CB
765.207	0.13881	0.0784433	1.76956	0.0768	0.451317	NBEA
581.703	0.0935346	0.0528693	1.76917	0.0768662	0.451317	ANKRD10
607.918	0.130652	0.0740683	1.76394	0.0777416	0.453493	TFDP2
368.761	0.297684	0.168879	1.7627	0.0779504	0.453515	SEMA5A
919.687	0.144328	0.0820284	1.75949	0.0784944	0.453515	TANC1
380.131	0.11065	0.0629473	1.75782	0.0787777	0.453515	SH3YL1
484.062	0.0854755	0.0486328	1.75757	0.078821	0.453515	CDC73
269.539	0.111609	0.0635927	1.75506	0.0792496	0.453515	MTA3
251.418	0.0997833	0.0568567	1.755	0.07926	0.453515	YTHDF3
213.14	0.113164	0.064705	1.74892	0.0803055	0.456589	FAM91A1
419.473	0.247785	0.141936	1.74576	0.0808529	0.457579	MAST4
1160.64	0.164097	0.0941085	1.7437	0.0812121	0.457579	TMEM63A
864.286	0.166003	0.0952592	1.74265	0.081395	0.457579	NASP
713.948	0.181103	0.104031	1.74085	0.081709	0.457579	PREX2
639.09	0.107924	0.0620186	1.74019	0.0818255	0.457579	KIF21A
480.836	0.232404	0.13363	1.73915	0.0820076	0.457579	GRIK4
1010.42	0.0575506	0.0331506	1.73604	0.0825575	0.457888	ATXN2
766.641	0.190692	0.109849	1.73595	0.0825728	0.457888	FXR1
1154.14	0.115939	0.0669552	1.73158	0.0833475	0.459632	AHI1
242.41	0.26358	0.152288	1.7308	0.083487	0.459632	EPHB2
877.22	0.096918	0.0560109	1.73034	0.0835694	0.459632	PHF3
1642.25	0.0742773	0.0429596	1.729	0.0838086	0.460009	USP34
266.505	0.09498	0.0550249	1.72613	0.0843248	0.461901	RAD23B
154.952	0.366204	0.212303	1.72491	0.0845434	0.462159	EYS
660.117	0.0909639	0.0529071	1.71931	0.0855571	0.466754	R3HDM2
268.642	0.0944567	0.0550411	1.71611	0.0861413	0.468992	MARK2
746.044	0.186041	0.108713	1.71129	0.0870272	0.471558	HDAC9
288.087	0.0908812	0.0531253	1.71069	0.0871376	0.471558	ZFAND6
409.72	0.081171	0.0475275	1.70787	0.0876599	0.472487	CTDSPL2
1029.45	0.0835916	0.0490084	1.70566	0.0880717	0.472691	PRRC2C
689.222	0.277275	0.16264	1.70484	0.088224	0.472691	EMC10
489.27	0.101865	0.0599595	1.6989	0.0893378	0.475724	DDX46
463.857	0.171842	0.10123	1.69753	0.0895963	0.475724	EPB41L3
287.066	0.120354	0.0710667	1.69353	0.0903544	0.475724	PRR14L
1351.47	0.185811	0.109738	1.69323	0.0904124	0.475724	BBS9
945.273	0.408189	0.241676	1.68899	0.0912215	0.475724	HSP90AB1
273.081	0.0966827	0.0572812	1.68786	0.0914379	0.475724	NNT
412.944	0.0811585	0.0480952	1.68746	0.0915157	0.475724	AP1G1
424.985	0.105732	0.0626741	1.68701	0.0916014	0.475724	ZSWIM5
535.3	0.142915	0.0847763	1.68579	0.091837	0.475724	ZDHHC21
235.35	0.120607	0.0715839	1.68483	0.0920205	0.475724	ZNF678
669.871	0.0958808	0.0569388	1.68393	0.0921958	0.475724	HNRNPC
2852.32	0.112913	0.0670904	1.683	0.0923744	0.475724	SORT1
324.611	0.107297	0.0638609	1.68017	0.0929245	0.475724	TRA2B
701.709	0.0850017	0.0506111	1.67951	0.0930533	0.475724	MAP2K5
570.21	0.129006	0.0768257	1.6792	0.0931136	0.475724	SMARCA2
213.948	0.215217	0.128271	1.67783	0.0933796	0.475724	HEG1
239.582	0.119147	0.0711583	1.67439	0.0940541	0.477567	MSL2
786.388	0.0922961	0.0551612	1.67321	0.0942867	0.477636	TPD52
563.818	0.0675268	0.0404705	1.66854	0.0952076	0.480138	RPRD2
1286.36	0.117195	0.070336	1.66621	0.0956713	0.480138	FAM124A
391.756	0.0708804	0.0425772	1.66475	0.0959626	0.480138	PPIG
1365.16	0.265484	0.159669	1.66272	0.0963684	0.48095	MAP1B
376.218	0.109609	0.0661263	1.65757	0.0974048	0.485223	EVL
1477	0.113055	0.068726	1.64501	0.0999685	0.495248	SGK3
1781.96	0.0731496	0.0444949	1.644	0.100176	0.495368	MEGF10
202.339	0.508653	0.310014	1.64074	0.100851	0.497789	SLC25A48
354.099	0.288488	0.17602	1.63895	0.101224	0.497807	ERC2
327.031	0.122873	0.0750509	1.63719	0.101591	0.497953	NR6A1
384.683	0.15622	0.0954286	1.63704	0.101623	0.497953	SSBP3
392.52	0.126575	0.0773951	1.63544	0.101957	0.498685	ZBTB1
304.297	0.0991672	0.0606704	1.63452	0.102149	0.498718	SLC10A7
614.704	0.0852972	0.0522322	1.63304	0.102461	0.498795	VPS8
254.071	0.130507	0.0799622	1.63211	0.102655	0.498795	ATP13A3
253.116	0.256875	0.157485	1.63111	0.102868	0.498795	ALDH3A2
230.924	0.0937026	0.0576408	1.62563	0.104028	0.498795	ACADSB
276.811	0.0599925	0.0369091	1.62541	0.104075	0.498795	STAU1
1363.92	0.0699045	0.0430439	1.62403	0.10437	0.498795	KIDINS220
549.799	0.073438	0.0452661	1.62236	0.104726	0.498795	ACAP2
1830.41	0.104456	0.0643909	1.62222	0.104756	0.498795	MBNL1
460.236	0.0742692	0.0458901	1.61841	0.105573	0.501799	SS18
1063.29	0.13094	0.0810866	1.61482	0.106351	0.502409	CLIP4
369.671	0.0893775	0.0554519	1.6118	0.107005	0.502726	ARFIP1
647.875	0.12891	0.080066	1.61005	0.107387	0.502726	GRB10
257.282	0.0972996	0.0605677	1.60646	0.108173	0.502726	CEP44
391.368	0.0911298	0.0567942	1.60456	0.10859	0.502726	SLC25A27
461.316	0.0895445	0.0558787	1.60248	0.10905	0.502726	MYSM1
313.982	0.0939099	0.0586098	1.60229	0.109092	0.502726	CAND1
279.845	0.0758092	0.0474064	1.59913	0.109791	0.502726	DNAJC13
890.825	0.115687	0.0723524	1.59893	0.109835	0.502726	CDK5RAP2
8022.16	0.111119	0.0696215	1.59604	0.11048	0.502946	NCKAP5
365.598	0.195522	0.122642	1.59425	0.110881	0.503622	PAK1
205.475	0.0963809	0.0604761	1.5937	0.111002	0.503622	ZNF141
686.706	0.109277	0.0686075	1.59279	0.111207	0.503703	ADK
3132.4	0.129944	0.0816915	1.59066	0.111685	0.503792	GRID1
351.178	0.0795072	0.0500762	1.58773	0.112349	0.503792	NDUFAF2
325.96	0.405289	0.255549	1.58595	0.11275	0.504751	NEDD4L
1232.88	0.158852	0.100227	1.58492	0.112984	0.50496	CPQ
224.915	0.121266	0.076661	1.58185	0.113683	0.506408	ANO10
297.283	0.186672	0.118786	1.57149	0.116068	0.513634	TMEM30A
4065.96	0.135215	0.0861003	1.57044	0.116314	0.51387	LSAMP
1082.5	0.101076	0.0643947	1.56962	0.116503	0.51387	HNRNPU
268.42	0.0891782	0.0569975	1.5646	0.117677	0.517356	POT1
234.652	0.0895608	0.0573409	1.5619	0.118311	0.519171	SLC35D1
839.013	0.117302	0.075175	1.56039	0.118668	0.519171	FBN1
450.034	0.0474157	0.030413	1.55906	0.118982	0.5197	NR2C2
1255.42	0.0941612	0.0606787	1.5518	0.12071	0.524292	OSBPL9
279.096	0.172211	0.111026	1.55108	0.120883	0.524292	NDUFS2
638.407	0.104662	0.0675418	1.54958	0.121241	0.524292	TMEM117
276.795	0.204587	0.132099	1.54874	0.121444	0.524292	RPL37
338.785	0.068563	0.0443047	1.54753	0.121735	0.524292	FBXW4
727.107	0.0846311	0.0548124	1.54401	0.122585	0.524707	DENND1A
227.707	0.0893108	0.0578956	1.54262	0.122923	0.524707	LARP4
437.627	0.126437	0.0819778	1.54234	0.122992	0.524707	NDFIP2
317.899	0.0800496	0.0519576	1.54067	0.123397	0.524707	NDUFS4
218.384	0.184108	0.119701	1.53807	0.124032	0.525574	MYLK
765.933	0.0686959	0.0447204	1.53612	0.124509	0.526339	TRIM44
222.703	0.143551	0.0936201	1.53334	0.125193	0.526637	RAI14
679.334	0.206804	0.135284	1.52866	0.126348	0.527383	EEPD1
550.448	0.136655	0.0894681	1.52742	0.126658	0.527383	SRGAP3
353.13	0.113013	0.0740566	1.52603	0.127002	0.527383	UBQLN1
849.232	0.0879279	0.0576887	1.52418	0.127464	0.528487	SNX9
620.33	0.0863477	0.0567318	1.52204	0.128	0.529712	FBXL5
[truncated: 2,320 more rows]

## Sheet: MC_Oligos_sALS_Control
baseMean	log2FoldChange	lfcSE	stat	pvalue	padj	gene
[truncated: 2,695 more rows]

[truncated: 15 more sheets: SC_Oligos_C9ALS_Control, SC_Oligos_sALS_Control, GO_Up_MC_Oligos_C9ALS_Control, GO_Up_SC_Oligos_C9ALS_Control, GO_Down_SC_Oligos_C9ALS_Control, GO_Up_SC_Oligos_sALS_Control, MC_OPCs_C9ALS_Control, MC_OPCs_sALS_Control, SC_OPCs_C9ALS_Control, SC_OPCs_sALS_Control, GO_Up_SC_OPCs_C9ALS_Control, GO_Down_SC_OPCs_C9ALS_Control, GO_Up_SC_OPCs_sALS_Control, GO_Down_SC_Oligos_sALS_Control, Color_Pallete]
