# Supplementary material for: Motor System Oligodendroglia Atlas Reveals Activation States Associated with Region-Specific Vulnerability in ALS
Source: Research Square preprint supplement (doi:10.21203/rs.3.rs-8351425/v1), 2026-01-07
Supplement: Supplementary file 1 [file 234193d11449338e8a79687f.pdf]

**Title:** Motor System Oligodendroglia Atlas Reveals Activation States Associated with Region-Specific Vulnerability in ALS

**Date:** December 12, 2025

**DOI:** <https://doi.org/10.64898/2025.12.09.693234>

**Copyright:** The copyright holder for this preprint is the author/funder, who has granted bioRxiv a license to display the preprint in perpetuity. All rights reserved. No reuse allowed without permission.
